# Supplementary material for: Spontaneous mutations and the origin and maintenance of quantitative genetic variation
Source: eLife journal article supplement (doi:10.7554/elife.14625), 2016-05-23
Supplement: supp [file elife_poa_e14625_Supplementary_File_1.xlsx]

## Sheet: A
A. Summary of DNA sequencing for MA lines
Line	Number of Fragments Sequenced	Read Type	Median Filtered Coverage	Number of Sites for Mutation Identification
DGRP360	27,979,823	PE125	28	-
MA01	35,525,884	PE100	35	109,143,092
MA02	34,566,370	PE100	32	108,995,355
MA03	31,501,881	PE100	29	108,606,894
MA04	37,286,809	PE100	33	109,043,427
MA05	32,845,598	PE100	28	108,520,743
MA06	53,663,642	PE100	52	109,240,629
MA07	53,394,980	PE100	44	109,198,721
MA08	28,822,095	PE100	21	98,807,107
MA09	42,783,429	PE100	33	107,992,513
MA10	34,619,717	PE100	29	108,102,630
MA11	35,713,949	PE100	28	106,393,719
MA12	38,944,080	PE100	32	109,000,140
MA13	64,641,154	PE100	61	109,245,699
MA14	35,298,641	PE100	31	108,677,868
MA15	49,406,272	PE100	41	109,195,972
MA16	47,448,751	PE100	43	109,213,322
MA17	51,589,979	PE100	42	109,208,580
MA18	42,727,955	PE100	30	107,269,420
MA19	43,793,420	PE100	19	93,402,857
MA20	41,585,212	PE100	18	88,995,368
MA21	30,964,649	PE100	8	-
MA22	50,081,898	PE100	32	107,972,949
MA23	22,931,948	PE100	6	-
MA24	45,334,140	PE100	16	83,532,194
MA25	50,669,688	PE100	38	109,140,263
MA total	1,036,142,141	PE100	-	109,260,235

## Sheet: B
B. List of detected mutations
Chromosome	Position	Reference Allele	DGRP 360 Allele	Mutant Allele	Mutation Type	Mutant line	Mutant Allele Frequency	Mutant Annotation	FlyBase ID	Gene Symbol	Fixed in G130	Forward Primer	Reverse Primer
2L	16255	T	T	G	SNP	MA06	0.446154	intron_variant	FBgn0002121	l_2_gl	ND
2L	103563	CTCAC	CTCAC	C----	DEL	MA03	0.25641	frameshift_variant	FBgn0031217	CG11377	ND
2L	179883	C	C	T	SNP	MA25	0.869565	intron_variant	FBgn0016977	spen	ND
2L	306838	C	C	T	SNP	MA19	1	intron_variant	FBgn0004611	Plc21C	ND
2L	342090	CCC	CCC	A--	COMPLEX	MA04	1	intron_variant	FBgn0004611	Plc21C	ND
2L	385883	G	G	T	SNP	MA08	1	intron_variant	FBgn0000061	al	ND
2L	512317	C	C	T	SNP	MA02	0.204545	intron_variant	FBgn0003963	ush	ND
2L	525271	C	C	A	SNP	MA18	0.433333	intron_variant	FBgn0003963	ush	ND
2L	583337	G	G	A	SNP	MA01	0.45283	downstream_gene_variant	FBgn0010323	Gsc	ND
2L	627567	AGAA	AGAA	GGA-	COMPLEX	MA07	0.985075	frameshift_variant	FBgn0031273	CG2839	ND
2L	710638	G	G	T	SNP	MA12	0.407407	non_coding_exon_variant	FBgn0266323	CR44988	ND
2L	1074971	CTTATTATTATT---	CTTATTATTATTATT	ATTATTATTATT---	COMPLEX	MA11	0.235294	intron_variant	FBgn0003310	S	ND
2L	1122044	TTG	TTA	T-A	DEL	MA14	0.909091	intron_variant	FBgn0016926	Pino	ND
2L	1153985	A	A	T	SNP	MA13	0.988372	intron_variant	FBgn0261458	capt	Yes	AGGTGGAGGTGGTGTCTCTG	GCGGATGCTTGACTTTCTGT
2L	1242226	G	G	A	SNP	MA08	1	3_prime_UTR_variant	FBgn0031327	CG5397	ND
2L	1278341	CC	CC	C-	DEL	MA19	1	intron_variant	FBgn0041097	robo3	ND
2L	1426098	A	A	T	SNP	MA13	0.375	intergenic_region	-	-	ND
2L	1431209	CA	CC	C-	DEL	MA07	0.631579	intergenic_region	-	-	ND
2L	1645735	G	G	A	SNP	MA06	1	intergenic_region	-	-	ND
2L	1653877	T	T	C	SNP	MA04	0.758621	intron_variant	FBgn0086758	chinmo	ND
2L	1710283	C	C	A	SNP	MA25	0.333333	synonymous_variant	FBgn0031356	CG17660	ND
2L	1723928	TCTTCGTTGT	TCTTCGTTGT	T---------	DEL	MA01	0.578947	5_prime_UTR_variant	FBgn0031359	Rim2	ND
2L	1912873	G	G	A	SNP	MA22	0.475	intron_variant	FBgn0031374	CG7337	ND
2L	1926274	G	G	A	SNP	MA09	0.232143	intron_variant	FBgn0031374	CG7337	ND
2L	2031693	C	C	T	SNP	MA25	0.790698	non_coding_exon_variant	FBgn0011860	tRNA:G3:22BCb	ND
2L	2085657	C-A	C-T	CCT	INS	MA12	0.411765	intron_variant	FBgn0053516	dpr3	ND
2L	2093882	C	C	T	SNP	MA19	1	intron_variant	FBgn0053516	dpr3	ND
2L	2202359	T	T	A	SNP	MA12	0.315789	intergenic_region	-	-	ND
2L	2255263	C	C	G	SNP	MA09	0.977273	upstream_gene_variant	FBgn0031406	Send1	ND
2L	2289898	TG	TG	T-	DEL	MA02	0.407407	upstream_gene_variant	FBgn0031410	CG17237	No	TTGATGGCTGCGACAGTAGT	CCCGCAGGAAGATTACTTCA
2L	2428356	G	G	A	SNP	MA19	1	upstream_gene_variant	FBgn0266217	CR44912	ND
2L	2430511	A	A	C	SNP	MA05	1	intron_variant	FBgn0000490	dpp	ND
2L	2477356	G	G	T	SNP	MA04	1	intergenic_region	-	-	ND
2L	2574252	AAGAA	AAGAA	A----	DEL	MA12	0.513514	intron_variant	FBgn0026778	Rad1	ND
2L	2574511	G	G	A	SNP	MA08	1	5_prime_UTR_variant	FBgn0026778	Rad1	ND
2L	2595629	C	C	T	SNP	MA19	0.961538	intergenic_region	-	-	ND
2L	2605946	T-	T-	TT	INS	MA19	0.9375	intergenic_region	-	-	ND
2L	2627722	GGCTCC-----	GGCTCC-----	CACTCCCCTCC	COMPLEX	MA15	0.36	non_coding_exon_variant	FBgn0267269	CR45705	ND
2L	2628047	C	C	T	SNP	MA03	0.607143	upstream_gene_variant	FBgn0267269	CR45705	ND
2L	2656231	A	A	G	SNP	MA09	0.254237	3_prime_UTR_variant	FBgn0031443	Prosbeta4R2	ND
2L	2848282	C	C	T	SNP	MA07	0.772727	synonymous_variant	FBgn0031472	CG2983	ND
2L	2905062	G	G	T	SNP	MA16	0.419355	intron_variant	FBgn0041111	lilli	ND
2L	2920029	A	A	T	SNP	MA19	0.304348	intron_variant	FBgn0041111	lilli	ND
2L	2922954	C	C	A	SNP	MA15	0.606061	intron_variant	FBgn0041111	lilli	ND
2L	2939891	AA	AA	A-	DEL	MA19	1	intron_variant	FBgn0041111	lilli	ND
2L	2985144	G	G	C	SNP	MA14	0.346154	missense_variant	FBgn0250786	Chd1	ND
2L	3026359	A	A	T	SNP	MA01	0.510638	3_prime_UTR_variant	FBgn0031492	CG3542	ND
2L	3086985	G	G	A	SNP	MA19	1	intron_variant	FBgn0015600	toc	ND
2L	3089962	GCGGAG	GCGGAG	G-----	DEL	MA01	1	frameshift_variant	FBgn0015600	toc	ND
2L	3099768	A	A	T	SNP	MA24	0.714286	5_prime_UTR_variant	FBgn0015600	toc	ND
2L	3130268	C	C	G	SNP	MA12	0.325581	intron_variant	FBgn0015600	toc	ND
2L	3271427	C	C	A	SNP	MA22	0.74	missense_variant	FBgn0031513	CG3347	ND
2L	3326792	C	C	T	SNP	MA15	0.775	downstream_gene_variant	FBgn0053281	CG33281	ND
2L	3442362	G	G	C	SNP	MA20	0.434783	intergenic_region	-	-	ND
2L	3505966	TATCTACTTTTCTTGGA	TATCTACTTTTCTTGGA	T----------------	DEL	MA13	1	intron_variant	FBgn0014396	tim	Yes	CAGCGCAAACAGTTGAGAAA	GGGAATCGTCCTGAAACTGA
2L	3602220	G	G	A	SNP	MA04	1	intergenic_region	-	-	ND
2L	3606995	TGGCTTTTTCCGTTCCTT	TGGCTTTTTCCGTTCCTT	T-----------------	DEL	MA22	0.59375	upstream_gene_variant	FBgn0002985	odd	ND
2L	3635339	C	C	A	SNP	MA01	1	intron_variant	FBgn0000721	for	ND
2L	3640222	C	C	T	SNP	MA14	0.275	synonymous_variant	FBgn0000721	for	ND
2L	3764453	T	T	A	SNP	MA24	1	missense_variant	FBgn0263846	CG43707	ND
2L	3766532	A	A	G	SNP	MA17	0.395833	intron_variant	FBgn0263846	CG43707	ND
2L	3782852	C	C	G	SNP	MA19	1	missense_variant	FBgn0004893	bowl	ND
2L	3907087	ATAAAACA	ATAAAACA	A-------	DEL	MA10	0.222222	intron_variant	FBgn0051774	fred	ND
2L	3937147	T	T	C	SNP	MA19	0.961538	intron_variant	FBgn0051774	fred	ND
2L	3970177	T	T	G	SNP	MA09	0.594595	intron_variant	FBgn0051774	fred	ND
2L	3998502	G	G	A	SNP	MA11	0.485714	intergenic_region	-	-	ND
2L	4115115	CTCTTAAGA	CTCTTAAGC	TTCTTAAGC	SNP	MA20	1	3_prime_UTR_variant	FBgn0000547	ed	ND
2L	4201819	C	C	A	SNP	MA02	0.238095	intron_variant	FBgn0001075	ft	ND
2L	4394847	C	C	G	SNP	MA03	0.314286	missense_variant	FBgn0022153	l_2_k05819	ND
2L	4416135	C	C	T	SNP	MA11	0.275862	intron_variant	FBgn0031602	CG15431	ND
2L	4505385	G	G	A	SNP	MA14	0.428571	missense_variant	FBgn0053196	dp	ND
2L	4939233	T	T	C	SNP	MA25	0.37037	synonymous_variant	FBgn0003372	Sgs1	ND
2L	5048867	CTG	CTG	TTT	COMPLEX	MA14	0.21875	missense_variant	FBgn0031675	CG9121	ND
2L	5064033	C	C	T	SNP	MA15	0.827586	intron_variant	FBgn0028572	qtc	ND
2L	5203488	C	C	A	SNP	MA05	1	synonymous_variant	FBgn0261836	Msp300	ND
2L	5245749	C	C	T	SNP	MA08	1	intron_variant	FBgn0003716	tkv	ND
2L	5468551	G	G	A	SNP	MA07	1	downstream_gene_variant	FBgn0261963	mid	ND
2L	5506990	G	G	A	SNP	MA05	0.277778	intergenic_region	-	-	ND
2L	5588384	TT	TT	T-	DEL	MA09	0.608696	5_prime_UTR_variant	FBgn0031723	CG7251	ND
2L	5678396	TT	TT	T-	DEL	MA18	0.961538	upstream_gene_variant	FBgn0031729	CG12511	ND
2L	5884212	A-	A-	AA	INS	MA10	0.351351	frameshift_variant	FBgn0265785	CG44574	ND
2L	6025818	C	C	A	SNP	MA20	0.25	downstream_gene_variant	FBgn0031765	CG9109	ND
2L	6091268	AAAG	AAAT	A--T	DEL	MA13	0.861538	intron_variant	FBgn0266450	Kr-h1	ND
2L	6112668	T	T	A	SNP	MA22	0.30303	intron_variant	FBgn0266521	stai	ND
2L	6244962	T	T	C	SNP	MA19	1	intergenic_region	-	-	ND
2L	6290267	A	A	G	SNP	MA05	0.795455	intron_variant	FBgn0053531	Ddr	ND
2L	6422279	G	G	A	SNP	MA02	1	synonymous_variant	FBgn0011722	Tig	Yes	CTTTGCCTCGAAGAAGTTGG	ATCACAGGATGAGGGCTCTG
2L	6516155	G	G	A	SNP	MA10	0.365854	intron_variant	FBgn0051637	CG31637	ND
2L	6517186	G	G	T	SNP	MA01	0.232143	intron_variant	FBgn0051637	CG31637	ND
2L	6566461	C	C	T	SNP	MA10	0.296296	upstream_gene_variant	FBgn0031834	CG13766	ND
2L	6720266	T	T	C	SNP	MA07	1	3_prime_UTR_variant	FBgn0025777	homer	ND
2L	6885250	C	C	A	SNP	MA25	1	intron_variant	FBgn0031866	Nlg2	ND
2L	6974122	G	G	C	SNP	MA16	0.735294	missense_variant	FBgn0031879	uif	ND
2L	7306967	T	T	C	SNP	MA14	0.344828	upstream_gene_variant	FBgn0004009	wg	ND
2L	7540662	T	T	G	SNP	MA15	0.488889	intron_variant	FBgn0264895	RapGAP1	ND
2L	7541956	G	G	A	SNP	MA19	1	intron_variant	FBgn0264895	RapGAP1	ND
2L	7558713	C	C	A	SNP	MA14	0.244898	intron_variant	FBgn0264895	RapGAP1	ND
2L	7593449	C-------	C-------	CGCCACTC	INS	MA22	0.52381	intergenic_region	-	-	ND
2L	7599592	AAT	AAG	A-G	DEL	MA24	0.947368	intergenic_region	-	-	ND
2L	7623552	C	C	T	SNP	MA25	0.966667	intergenic_region	-	-	ND
2L	7694036	G	G	T	SNP	MA24	0.333333	missense_variant	FBgn0041182	Tep2	ND
2L	7722116	A	A	G	SNP	MA07	0.944444	intron_variant	FBgn0031936	CG13794	ND
2L	7782425	C	C	G	SNP	MA05	0.416667	missense_variant	FBgn0031946	CG7164	ND
2L	7797800	G	G	C	SNP	MA24	1	intron_variant	FBgn0031950	Herp	Yes	CCTCCTGAATGTTGGGAAAA	TCATCTACAACGCCTGGATG
2L	7814771	TT	TT	T-	DEL	MA05	0.380952	intron_variant	FBgn0261800	LanB1	ND
2L	7872968	A	A	G	SNP	MA22	0.708333	upstream_gene_variant	FBgn0266904	CR45364	ND
2L	7872984	C	C	G	SNP	MA22	0.678571	upstream_gene_variant	FBgn0266904	CR45364	ND
2L	7880608	A	A	C	SNP	MA07	0.795455	intergenic_region	-	-	ND
2L	7965008	GAG	GAG	G--	DEL	MA06	0.945946	intron_variant	FBgn0085450	Snoo	ND
2L	8000882	A	A	C	SNP	MA02	0.583333	intron_variant	FBgn0031972	Wwox	ND
2L	8116665	A	A	G	SNP	MA11	0.213115	downstream_gene_variant	FBgn0261822	Bsg	ND
2L	8193089	G	G	T	SNP	MA16	0.28	intron_variant	FBgn0031995	CG8475	ND
2L	8337561	G	G	A	SNP	MA14	0.25	upstream_gene_variant	FBgn0032023	CG14274	ND
2L	8449065	G	G	C	SNP	MA12	0.442308	missense_variant	FBgn0027780	U26	ND
2L	8529822	G	G	A	SNP	MA18	1	intron_variant	FBgn0028394	CG17834	ND
2L	8560430	G	G	A	SNP	MA12	0.529412	intron_variant	FBgn0011259	Sema-1a	ND
2L	8567443	T	T	A	SNP	MA24	1	intron_variant	FBgn0011259	Sema-1a	Yes	GCGCAGATTTCCTGATTACC	ACGTCGGCGACAGAACTATT
2L	8611746	C	C	T	SNP	MA07	0.235294	intron_variant	FBgn0011259	Sema-1a	ND
2L	8800174	TA	TA	T-	DEL	MA02	0.964286	intergenic_region	-	-	ND
2L	8899244	C	C	T	SNP	MA13	0.208955	5_prime_UTR_premature_start_codon_gain_variant	FBgn0085427	CG34398	No	AGTGAAGCCAAGCGTTGAGT	CAGCGTGAAGTCCACTGAAG
2L	9014392	G	G	A	SNP	MA14	0.378378	upstream_gene_variant	FBgn0032089	Rcd-1r	ND
2L	9137912	AT	AT	A-	DEL	MA11	0.26087	intron_variant	FBgn0052982	CG32982	No	GCGGTTCAAGCTTTTGACTT	GCCCAAAATGCAACAAAACT
2L	9310719	A	A	G	SNP	MA06	0.577778	intergenic_region	-	-	ND
2L	9346276	T	T	C	SNP	MA19	0.411765	intergenic_region	-	-	ND
2L	9469359	AAA	AAA	A--	DEL	MA12	0.5	upstream_gene_variant	FBgn0264269	CR43769	ND
2L	9600390	G	G	A	SNP	MA15	0.207547	missense_variant	FBgn0032132	CG4382	ND
2L	9846767	C	C	T	SNP	MA19	0.433333	intron_variant	FBgn0032151	nAChRalpha6	ND
2L	9862744	GCTCCTGCTTCTG	G------------	GCTCCTGCTCCTG	INS	MA20	0.225806	intron_variant	FBgn0032151	nAChRalpha6	ND
2L	9907398	T	T	G	SNP	MA07	1	5_prime_UTR_variant	FBgn0032156	CG13124	ND
2L	9989047	GTG	GTG	G--	DEL	MA25	0.346154	intron_variant	FBgn0000180	bib	ND
2L	10089144	C	C	T	SNP	MA12	0.97561	intron_variant	FBgn0265002	CG44153	ND
2L	10185875	A	A	G	SNP	MA10	0.363636	intron_variant	FBgn0028675	Sur	ND
2L	10270176	C	C	G	SNP	MA01	0.525	missense_variant	FBgn0260750	Mulk	ND
2L	10453446	G	G	A	SNP	MA24	0.35	missense_variant	FBgn0032253	CG5322	No	TACCGAAGAAATCGGGAATC	TGCCTATGTTTTCCGTCCAT
2L	10579079	TT	TT	T-	DEL	MA03	0.878788	intron_variant	FBgn0051721	Trim9	ND
2L	10584915	C	C	T	SNP	MA09	0.340426	intron_variant	FBgn0051721	Trim9	ND
2L	10842408	C	C	A	SNP	MA10	0.866667	5_prime_UTR_premature_start_codon_gain_variant	FBgn0032305	CG6700	ND
2L	10912114	C	C	T	SNP	MA19	0.8	intergenic_region	-	-	ND
2L	10925662	C	C	A	SNP	MA17	1	intron_variant	FBgn0261871	dpr2	ND
2L	10930641	CTTCGCG	CTTCGCT	GTTCGCT	SNP	MA14	0.304348	intron_variant	FBgn0261871	dpr2	ND
2L	10931960	T	T	C	SNP	MA19	1	intron_variant	FBgn0261871	dpr2	ND
2L	11060645	C	C	A	SNP	MA03	1	intron_variant	FBgn0032330	Samuel	ND
2L	11158082	G	G	A	SNP	MA19	0.407407	3_prime_UTR_variant	FBgn0259822	Ca-beta	ND
2L	11226718	AA	AA	A-	DEL	MA11	0.56	intron_variant	FBgn0264442	ab	ND
2L	11304083	G---	G---	GTTC	INS	MA12	0.961538	intergenic_region	-	-	ND
2L	11465437	A	A	C	SNP	MA18	1	intergenic_region	-	-	ND
2L	11494675	G	A	C	SNP	MA19	0.636364	intergenic_region	-	-	ND
2L	11741592	G	G	A	SNP	MA02	0.46875	synonymous_variant	FBgn0032373	Vha100-5	ND
2L	11747910	G	G	T	SNP	MA14	0.4	intergenic_region	-	-	ND
2L	11747927	TCG	TCG	CCC	COMPLEX	MA14	0.375	intergenic_region	-	-	ND
2L	11778140	C	C	G	SNP	MA25	0.235294	intergenic_region	-	-	ND
2L	11892173	G	G	T	SNP	MA12	0.823529	intron_variant	FBgn0264815	Pde1c	ND
2L	11940873	C	C	T	SNP	MA02	1	intergenic_region	-	-	ND
2L	11953094	C	C	A	SNP	MA12	0.48	non_coding_exon_variant	FBgn0263019	CR43314	ND
2L	11976656	C	C	T	SNP	MA16	0.25	intergenic_region	-	-	ND
2L	12038173	G	G	T	SNP	MA11	0.48	5_prime_UTR_variant	FBgn0032397	Tom70	Yes	AATGGCCTCATCGTACTTCC	TTTTTCGATGTCGTGTGCTC
2L	12103154	TT	TT	T-	DEL	MA19	0.956522	5_prime_UTR_variant	FBgn0029137	Patsas	ND
2L	12130861	A	A	C	SNP	MA24	0.305556	intron_variant	FBgn0032415	rho-6	ND
2L	12206407	G	G	A	SNP	MA06	0.811321	intron_variant	FBgn0000114	aret	ND
2L	12238236	T	T	A	SNP	MA02	0.25	intron_variant	FBgn0000114	aret	ND
2L	12388908	A	A	T	SNP	MA01	0.941176	intron_variant	FBgn0262475	bru-2	ND
2L	12394778	C	G	T	SNP	MA15	0.552632	intron_variant	FBgn0262475	bru-2	ND
2L	12587945	C	C	A	SNP	MA17	0.205882	5_prime_UTR_variant	FBgn0085424	nub	ND
2L	12655196	T	T	G	SNP	MA14	0.235294	intergenic_region	-	-	ND
2L	12661499	G	G	A	SNP	MA01	0.965517	intron_variant	FBgn0004394	pdm2	ND
2L	12712883	C	C	A	SNP	MA12	0.933333	5_prime_UTR_premature_start_codon_gain_variant	FBgn0032454	CG5787	ND
2L	12749875	G	G	A	SNP	MA19	1	intergenic_region	-	-	ND
2L	12877393	G	G	T	SNP	MA19	0.944444	intergenic_region	-	-	ND
2L	12913803	T	T	A	SNP	MA02	0.642857	missense_variant	FBgn0040508	ACXC	ND
2L	12941465	T	T	A	SNP	MA07	1	intergenic_region	-	-	ND
2L	12953751	TGTC	TGTC	CAA-	COMPLEX	MA13	0.244898	intergenic_region	-	-	ND
2L	13015308	G	G	A	SNP	MA18	1	synonymous_variant	FBgn0032467	CG9934	ND
2L	13029376	G	G	A	SNP	MA05	0.555556	missense_variant	FBgn0262160	CG9932	ND
2L	13081752	CCTT	TCTC	TCTT	SNP	MA02	0.30303	intergenic_region	-	-	ND
2L	13264835	C	C	G	SNP	MA13	0.208955	intron_variant	FBgn0264894	CG44085	ND
2L	13269359	TA	TA	CT	MNP	MA01	0.977273	intron_variant	FBgn0264894	CG44085	ND
2L	13401391	T	T	C	SNP	MA07	1	intron_variant	FBgn0032521	CG7110	ND
2L	13536532	G	G	A	SNP	MA12	0.441176	intron_variant	FBgn0023407	B4	ND
2L	13537539	T	T	G	SNP	MA14	0.5625	intron_variant	FBgn0023407	B4	ND
2L	13567867	GA	G-	GG	INS	MA19	0.222222	intron_variant	FBgn0259984	kuz	ND
2L	13668166	C	C	T	SNP	MA18	0.222222	synonymous_variant	FBgn0028527	CG18507	ND
2L	13792434	C	C	T	SNP	MA22	0.586207	missense_variant	FBgn0028931	CG16863	ND
2L	13798825	T	T	C	SNP	MA25	0.533333	missense_variant	FBgn0028538	Sec71	ND
2L	13899271	CTC	CTC	ATT	COMPLEX	MA18	0.323529	3_prime_UTR_variant	FBgn0019890	Smg5	ND
2L	14150264	G	G	T	SNP	MA13	0.987342	intron_variant	FBgn0028906	CG17341	ND
2L	14174367	C	C	T	SNP	MA19	1	intron_variant	FBgn0263038	CG43333	ND
2L	14219030	C	C	T	SNP	MA18	0.27027	intron_variant	FBgn0016930	Dyrk2	ND
2L	14228396	A	A	T	SNP	MA04	1	intron_variant	FBgn0016930	Dyrk2	ND
2L	14260473	G	G	T	SNP	MA01	1	intergenic_region	-	-	ND
2L	14315423	C	C	A	SNP	MA25	0.979167	intron_variant	FBgn0261563	wb	ND
2L	14340996	C	C	T	SNP	MA19	0.944444	intron_variant	FBgn0028916	CG33090	ND
2L	14355577	CTCCGC	CTCCGC	GCCCG-	COMPLEX	MA09	0.735294	non_coding_exon_variant	FBgn0266145	CR44851	ND
2L	14583296	G	G	A	SNP	MA11	0.56	intergenic_region	-	-	ND
2L	14663650	AAGAA	A----	AAAAA	INS	MA09	0.25	intron_variant	FBgn0003016	osp	ND
2L	14798763	T	T	G	SNP	MA02	0.25	intergenic_region	-	-	No	TACATTTGGTGGGGGAAATG	ATTTGTTTGCGGCATCTCTT
2L	14884835	A	A	T	SNP	MA02	0.5	upstream_gene_variant	FBgn0266840	CR45302	ND
2L	15082249	T	T	A	SNP	MA16	0.244898	intron_variant	FBgn0028879	CG15270	ND
2L	15250738	T	T	A	SNP	MA19	1	synonymous_variant	FBgn0028862	dao	ND
2L	15280252	CC	CC	TA	MNP	MA19	0.405405	non_coding_exon_variant	FBgn0266888	CR45349	ND
2L	15550356	G	G	A	SNP	MA25	0.215686	upstream_gene_variant	FBgn0028880	CG15256	ND
2L	15739580	A	A	T	SNP	MA14	0.54	intron_variant	FBgn0010382	CycE	ND
2L	15833950	G	G	T	SNP	MA18	1	downstream_gene_variant	FBgn0266908	CR45368	ND
2L	15911597	A	A	G	SNP	MA19	0.318182	intron_variant	FBgn0028645	beat-Ib	ND
2L	15989005	C	C	T	SNP	MA05	0.76	upstream_gene_variant	FBgn0263331	CR43412	ND
2L	16018765	TTTCAC	TTTCAT	GTTCAT	SNP	MA01	0.9	intron_variant	FBgn0028644	beat-Ic	ND
2L	16029248	G	G	T	SNP	MA11	0.212121	intron_variant	FBgn0028644	beat-Ic	Yes	GAAGTTGCAAGCAGGGAGAC	GCAGGGTTTGGTCTAATGGA
2L	16174467	GGCCT	GGCCC	TGCCC	SNP	MA07	0.317073	coding_variant	FBgn0001991	Ca-alpha1D	ND
2L	16289918	C	C	A	SNP	MA01	0.25	missense_variant	FBgn0040079	pkaap	ND
2L	16359511	G	G	A	SNP	MA19	0.517241	intergenic_region	-	-	ND
2L	16362871	AACAAATCG	AACAAATCG	TTTAA----	COMPLEX	MA09	0.5	intergenic_region	-	-	ND
2L	16436483	G	G	C	SNP	MA01	0.4	intron_variant	FBgn0028523	CG5888	ND
2L	16564906	G	G	A	SNP	MA11	0.590909	intron_variant	FBgn0259735	CG42389	ND
2L	16782921	C	C	T	SNP	MA12	1	synonymous_variant	FBgn0264695	Mhc	ND
2L	16847325	C	C	T	SNP	MA16	0.638889	intron_variant	FBgn0032614	CG13284	ND
2L	17092335	C	C	G	SNP	MA04	1	intergenic_region	-	-	ND
2L	17237342	G	G	A	SNP	MA19	0.961538	intron_variant	FBgn0032629	beat-IIIc	ND
2L	17254138	T	T	C	SNP	MA06	0.6	intron_variant	FBgn0032629	beat-IIIc	ND
2L	17264505	G	G	A	SNP	MA03	0.962963	intergenic_region	-	-	ND
2L	17264587	C	C	A	SNP	MA15	0.346154	intergenic_region	-	-	ND
2L	17309181	G	G	A	SNP	MA01	0.303571	intergenic_region	-	-	ND
2L	17392014	C	C	T	SNP	MA19	1	intron_variant	FBgn0020503	CLIP-190	ND
2L	17510485	T	T	A	SNP	MA18	0.294118	intron_variant	FBgn0013810	Dhc36C	ND
2L	17530701	C	C	A	SNP	MA15	0.759259	missense_variant	FBgn0032649	CG15145	ND
2L	17582173	C	C	T	SNP	MA01	0.375	intergenic_region	-	-	ND
2L	17625334	G	G	C	SNP	MA15	0.25	non_coding_exon_variant	FBgn0265586	CR44413	ND
2L	17825493	T	T	C	SNP	MA20	0.95	intron_variant	FBgn0262018	CadN2	ND
2L	17841707	G	G	A	SNP	MA22	1	intron_variant	FBgn0262018	CadN2	ND
2L	17846732	C	C	T	SNP	MA01	0.560976	intron_variant	FBgn0262018	CadN2	ND
2L	17878725	C	C	A	SNP	MA19	1	intergenic_region	-	-	ND
2L	18111448	G	G	A	SNP	MA24	0.928571	intergenic_region	-	-	ND
2L	18130698	G	G	C	SNP	MA19	0.777778	3_prime_UTR_variant	FBgn0001301	kel	ND
2L	18162983	C	C	T	SNP	MA15	0.655172	intron_variant	FBgn0261804	CG42750	ND
2L	18197505	AGGATGATATGAGAAGA	AGGATGATATGAGAAGA	A----------------	DEL	MA06	0.225	intron_variant	FBgn0261804	CG42750	ND
2L	18387679	A	A	G	SNP	MA16	0.729167	intron_variant	FBgn0000636	Fas3	ND
2L	18476184	G	G	A	SNP	MA18	0.289855	missense_variant	FBgn0032681	CG10283	ND
2L	18484403	AAC	AAT	A-T	DEL	MA04	1	5_prime_UTR_variant	FBgn0032681	CG10283	ND
2L	18502793	A	A	T	SNP	MA12	1	intron_variant	FBgn0032683	kon	ND
2L	18541520	C	C	A	SNP	MA19	0.962963	missense_variant	FBgn0085370	Pde11	ND
2L	18547006	T	T	C	SNP	MA19	0.363636	5_prime_UTR_variant	FBgn0085370	Pde11	ND
2L	18665369	G	G	A	SNP	MA04	1	intron_variant	FBgn0086200	CR42490	ND
2L	18688254	C	C	A	SNP	MA19	0.970588	missense_variant	FBgn0005617	msl-1	ND
2L	18858993	G	G	A	SNP	MA19	1	missense_variant	FBgn0032720	mRpL13	ND
2L	19009924	GCATCCTCATCCG	G------------	GCATCCACATCCG	INS	MA13	0.304348	upstream_gene_variant	FBgn0086710	RpL30	ND
2L	19118852	GAAAG	GAAAG	G----	DEL	MA16	0.638889	intron_variant	FBgn0000422	Ddc	ND
2L	19214912	AAC	AAG	A-G	DEL	MA10	0.904762	intergenic_region	-	-	ND
2L	19308269	AAG	AAT	A-T	DEL	MA15	0.942857	intergenic_region	-	-	ND
2L	19344294	G	G	A	SNP	MA08	0.92	intron_variant	FBgn0024245	dnt	ND
2L	19357545	G	G	T	SNP	MA04	1	intron_variant	FBgn0024245	dnt	ND
2L	19368951	C	C	G	SNP	MA12	1	intergenic_region	-	-	ND
2L	19695063	C	C	T	SNP	MA14	0.685714	intron_variant	FBgn0000464	Lar	ND
2L	19714972	C	C	T	SNP	MA19	0.954545	missense_variant	FBgn0000464	Lar	ND
2L	20096266	C	C	T	SNP	MA01	0.255814	downstream_gene_variant	FBgn0032848	nesd	ND
2L	20329819	C	C	G	SNP	MA02	0.482759	intron_variant	FBgn0003475	spir	ND
2L	20376215	C	C	G	SNP	MA06	1	downstream_gene_variant	FBgn0032856	CG16798	ND
2L	20480671	G	G	A	SNP	MA25	0.305556	intron_variant	FBgn0266315	CR44980	ND
2L	20537639	C	C	T	SNP	MA19	0.9	intergenic_region	-	-	ND
2L	20665753	C	C	T	SNP	MA16	0.696429	non_coding_exon_variant	FBgn0266356	CR45004	ND
2L	20685769	C	C	A	SNP	MA19	0.9375	3_prime_UTR_variant	FBgn0014859	Hr38	ND
2L	20838281	G	G	A	SNP	MA06	0.693878	upstream_gene_variant	FBgn0028986	Spn38F	ND
2L	21018531	C	C	T	SNP	MA19	0.62069	intron_variant	FBgn0250867	CG42238	ND
2L	21039267	C	C	T	SNP	MA24	0.210526	intron_variant	FBgn0250867	CG42238	ND
2L	21119120	C	C	T	SNP	MA22	0.218182	intron_variant	FBgn0040297	Nhe2	ND
2L	21127668	G	G	A	SNP	MA08	0.208333	intron_variant	FBgn0040297	Nhe2	ND
2L	21201648	TATT	TATT	T---	DEL	MA14	0.742857	3_prime_UTR_variant	FBgn0051988	CG31988	ND
2L	21260071	G	G	A	SNP	MA02	0.214286	downstream_gene_variant	FBgn0261239	Hr39	ND
2L	21285526	G	G	A	SNP	MA03	0.972973	downstream_gene_variant	FBgn0032940	Mio	ND
2L	21381418	G	G	A	SNP	MA19	1	intron_variant	FBgn0032946	nrv3	ND
2L	21406535	A	A	G	SNP	MA25	0.363636	downstream_gene_variant	FBgn0051754	His-Psi:CR31754	ND
2L	21636518	C	C	A	SNP	MA16	0.575	intron_variant	FBgn0023416	Ac3	ND
2L	21788327	T-AAAA	T-AAAT	TTAAAT	INS	MA03	0.923077	intron_variant	FBgn0051612	CG31612	ND
2L	21838280	A	A	G	SNP	MA10	0.44	intergenic_region	-	-	ND
2L	21928850	A	A	G	SNP	MA08	0.954545	intergenic_region	-	-	ND
2L	21976738	T	T	C	SNP	MA01	0.340909	intergenic_region	-	-	ND
2L	22133159	CACTATCGTCCAC	CACTATCATCCAA	AACTATCATCCAA	SNP	MA09	0.979167	intron_variant	FBgn0261802	CG42748	ND
2L	22226620	G	G	T	SNP	MA16	0.666667	non_coding_exon_variant	FBgn0042701	CR12628	ND
2L	22294788	C	C	A	SNP	MA01	0.37037	intergenic_region	-	-	ND
2L	22450912	GAGCCAG	GAGCCAG	G------	DEL	MA09	1	intergenic_region	-	-	ND
2L	22652487	G	G	A	SNP	MA11	0.405405	intergenic_region	-	-	ND
2L	22737722	TCT	TCT	T--	DEL	MA07	1	intron_variant	FBgn0041004	CG17715	ND
2L	22794310	T	T	C	SNP	MA18	0.206897	intergenic_region	-	-	ND
2L	22923267	T	T	C	SNP	MA19	0.909091	intergenic_region	-	-	ND
2L	22926427	C	C	T	SNP	MA03	0.594595	intergenic_region	-	-	ND
2L	22945659	C	C	A	SNP	MA14	0.25	intergenic_region	-	-	ND
2R	41313	C	C	T	SNP	MA01	0.317073	intergenic_region	-	-	ND
2R	305792	G	G	T	SNP	MA11	0.26087	intron_variant	FBgn0260798	Gprk1	Yes	TCCGAAAAGGTTCTGCAGTC	AGCGGGCGTATGTTTTATTG
2R	468222	A	A	T	SNP	MA25	0.326087	intergenic_region	-	-	ND
2R	504862	A	A	T	SNP	MA07	0.310345	intergenic_region	-	-	ND
2R	600236	T	T	C	SNP	MA19	0.958333	synonymous_variant	FBgn0026401	Nipped-B	ND
2R	723143	T	T	A	SNP	MA03	0.438596	intergenic_region	-	-	ND
2R	805036	C	C	T	SNP	MA07	0.466667	synonymous_variant	FBgn0040849	Ir41a	ND
2R	826725	CAGTCCAAAACTTTAAGACTTGTGC	CAGTCCAAAACTTTAAGACTTGTGC	C------------------------	DEL	MA05	0.4375	intron_variant	FBgn0040849	Ir41a	ND
2R	847305	C	C	A	SNP	MA19	0.95	intron_variant	FBgn0040849	Ir41a	ND
2R	959697	A	A	T	SNP	MA15	0.288889	intergenic_region	-	-	ND
2R	1154705	C	C	G	SNP	MA24	0.472222	intron_variant	FBgn0033015	d4	ND
2R	1170275	T	T	A	SNP	MA24	1	intron_variant	FBgn0033015	d4	ND
2R	1210691	A	A	T	SNP	MA11	0.311111	intron_variant	FBgn0261403	sxc	No	CCTCCTTGCACCTTCAAATC	GTCCAGCACAGGGTTCAGTT
2R	1229569	C	C	A	SNP	MA19	0.971429	intergenic_region	-	-	ND
2R	1439348	A	A	C	SNP	MA15	0.763636	intergenic_region	-	-	ND
2R	1628619	TC	TC	AT	MNP	MA15	0.568182	intergenic_region	-	-	ND
2R	1732113	T	T	A	SNP	MA07	0.320513	intron_variant	FBgn0085414	dpr12	ND
2R	1747169	G	G	A	SNP	MA16	0.629032	3_prime_UTR_variant	FBgn0085414	dpr12	ND
2R	1903731	T	T	A	SNP	MA22	0.272727	upstream_gene_variant	FBgn0000043	Act42A	ND
2R	1950916	G	G	C	SNP	MA15	0.75	intron_variant	FBgn0033058	CCHa2-R	ND
2R	1951412	T	T	G	SNP	MA19	0.952381	intron_variant	FBgn0033058	CCHa2-R	ND
2R	2003732	C	C	T	SNP	MA25	1	intron_variant	FBgn0000546	EcR	ND
2R	2032424	G	G	T	SNP	MA18	1	intron_variant	FBgn0000546	EcR	ND
2R	2161898	G	G	C	SNP	MA02	0.369565	intergenic_region	-	-	ND
2R	2707887	A	A	C	SNP	MA25	1	downstream_gene_variant	FBgn0265635	CR44442	ND
2R	3003969	A	A	C	SNP	MA17	0.36	intron_variant	FBgn0263934	esn	ND
2R	3042801	T	T	C	SNP	MA18	0.282609	synonymous_variant	FBgn0044011	Spn43Ad	ND
2R	3050079	G	G	T	SNP	MA14	0.243243	intron_variant	FBgn0003090	pk	ND
2R	3268724	T	T	C	SNP	MA02	0.418605	intron_variant	FBgn0033159	Dscam1	ND
2R	3281723	CTACT	CTACT	G----	COMPLEX	MA18	1	intron_variant	FBgn0033162	CG1707	ND
2R	3363909	C	C	T	SNP	MA19	0.969697	5_prime_UTR_variant	FBgn0010548	Aldh-III	ND
2R	3409013	G	G	A	SNP	MA19	0.97619	synonymous_variant	FBgn0033187	CG2144	ND
2R	3442292	G	G	C	SNP	MA19	1	intron_variant	FBgn0033192	Corin	ND
2R	3448420	TG	TG	T-	DEL	MA14	0.513514	intron_variant	FBgn0033192	Corin	ND
2R	3727309	C	C	G	SNP	MA24	1	intron_variant	FBgn0085390	Dgk	ND
2R	3780227	G	G	A	SNP	MA02	1	intron_variant	FBgn0050377	CG30377	ND
2R	3819976	G	G	A	SNP	MA14	0.230769	5_prime_UTR_variant	FBgn0026722	drosha	ND
2R	3836725	TCAAGA	TCAAGA	T-AAGG	COMPLEX	MA05	1	intron_variant	FBgn0033236	CG14764	ND
2R	3945117	T	T	G	SNP	MA19	1	5_prime_UTR_variant	FBgn0033252	CG12769	ND
2R	4096818	C	C	T	SNP	MA24	0.9375	intron_variant	FBgn0053087	LRP1	ND
2R	4262208	TGTGTGTTT	TGTGTGTTT	T--------	DEL	MA05	0.428571	intron_variant	FBgn0261588	pdm3	ND
2R	4274416	C	C	G	SNP	MA14	0.414634	intron_variant	FBgn0261588	pdm3	ND
2R	4469841	C	C	T	SNP	MA19	0.958333	intron_variant	FBgn0259226	CG42326	ND
2R	4582071	T-----------	T-----------	TGAAGATGCCCA	INS	MA11	0.272727	frameshift_variant	FBgn0033320	CG8586	Yes	GCTTCGCCTGACACTCTTCT	AGTCCTTGTACCGCTGTTGC
2R	4627577	C	C	T	SNP	MA20	0.95	intron_variant	FBgn0027585	CG8740	ND
2R	4651593	A	A	T	SNP	MA25	0.590909	intergenic_region	-	-	ND
2R	4663054	C	C	G	SNP	MA15	0.826087	intergenic_region	-	-	ND
2R	4886222	C	C	G	SNP	MA01	1	intron_variant	FBgn0265011	Np	ND
2R	5121003	C	C	T	SNP	MA19	1	intron_variant	FBgn0010114	hig	ND
2R	5192905	T	T	C	SNP	MA02	0.366667	splice_region_variant	FBgn0033402	Myd88	ND
2R	5359816	CAG	CAG	TAT	COMPLEX	MA13	0.372549	missense_variant	FBgn0259234	Camta	ND
2R	5879806	G	G	A	SNP	MA19	0.947368	missense_variant	FBgn0261014	TER94	ND
2R	5933217	C	C	A	SNP	MA06	0.811321	intron_variant	FBgn0033476	oys	ND
2R	6104040	TATATAATTT	TATATAATTA	AATATAATTA	SNP	MA19	0.368421	intron_variant	FBgn0000448	Hr46	ND
2R	6246753	C	C	T	SNP	MA19	0.875	intron_variant	FBgn0261698	CG42732	ND
2R	6444399	TT	TT	T-	DEL	MA19	0.941176	upstream_gene_variant	FBgn0263102	psq	ND
2R	6561168	TTAGC	TTGGG	T-GGG	DEL	MA06	0.956522	5_prime_UTR_variant	FBgn0024836	stan	ND
2R	6642194	G	G	A	SNP	MA14	0.209302	intron_variant	FBgn0053144	CG33144	ND
2R	6645623	C	C	A	SNP	MA19	0.952381	intron_variant	FBgn0053144	CG33144	ND
2R	6705338	G	G	A	SNP	MA06	1	stop_gained	FBgn0086898	dgo	ND
2R	6722440	C	C	A	SNP	MA22	0.25	intron_variant	FBgn0033558	CG12344	ND
2R	6781011	TTGTGT	TTGTGT	T-----	DEL	MA03	1	frameshift_variant	FBgn0017414	cag	ND
2R	6806112	CAC	CAC	G--	COMPLEX	MA12	0.441176	intergenic_region	-	-	ND
2R	6817827	A	A	G	SNP	MA19	1	intergenic_region	-	-	ND
2R	6854109	G	G	T	SNP	MA03	0.793103	intergenic_region	-	-	ND
2R	6928748	ATTCCGGA	ATTCCGGA	A-------	DEL	MA22	0.933333	intron_variant	FBgn0040765	luna	ND
2R	7036733	T	T	G	SNP	MA20	0.970588	missense_variant	FBgn0033581	CG12391	ND
2R	7077132	AATTCGGAAA	AATTCGGAAA	A---------	DEL	MA12	0.4	intron_variant	FBgn0003396	shn	ND
2R	7320366	C	C	A	SNP	MA15	0.22807	non_coding_exon_variant	FBgn0264271	CR43771	ND
2R	7326111	A	A	C	SNP	MA02	0.214286	intron_variant	FBgn0033635	CG7777	ND
2R	7332723	AAT	AAC	A-C	DEL	MA18	1	intron_variant	FBgn0260499	qvr	ND
2R	7344625	C	C	T	SNP	MA09	1	synonymous_variant	FBgn0000581	E_Pc_	ND
2R	7370580	T	T	A	SNP	MA03	1	intron_variant	FBgn0001269	inv	ND
2R	7422871	A	A	T	SNP	MA15	0.694915	intergenic_region	-	-	ND
2R	7439278	CC	CC	C-	DEL	MA20	0.9375	intergenic_region	-	-	ND
2R	7495654	C	C	T	SNP	MA16	0.5	intron_variant	FBgn0033636	tou	ND
2R	7609198	GA	GA	TT	MNP	MA17	0.76087	intron_variant	FBgn0033649	pyr	ND
2R	7737284	G	G	A	SNP	MA07	0.47619	missense_variant	FBgn0033657	Sln	ND
2R	7846290	T	T	C	SNP	MA15	0.289474	intron_variant	FBgn0033668	CG13188	ND
2R	7910219	A--------------	ACAGAAGGGTGATGA	ACAGAAGGGTGATAA	SNP	MA07	0.358974	downstream_gene_variant	FBgn0033674	CG8964	ND
2R	7959244	T	T	C	SNP	MA07	0.978261	intron_variant	FBgn0033679	CG8888	ND
2R	8006063	A	A	G	SNP	MA20	0.636364	5_prime_UTR_variant	FBgn0086677	jeb	ND
2R	8080253	AGAACGATGTTGAGCGCCTCCTTTTTCA	AGAACGATGTTGAGCGCCTCCTTTTTCA	A---------------------------	DEL	MA14	0.318182	disruptive_inframe_deletion	FBgn0033698	CG8858	ND
2R	8087662	G	G	A	SNP	MA02	0.609756	missense_variant	FBgn0033699	RpS11	No	CGCACAAAGTGCAGGTAGTC	TGGTGTCGCCAATAGTGAAC
2R	8089234	T	T	G	SNP	MA07	0.607143	upstream_gene_variant	FBgn0033699	RpS11	ND
2R	8129743	C	C	T	SNP	MA02	0.515152	upstream_gene_variant	FBgn0263021	CG43316	ND
2R	8350357	G	G	A	SNP	MA19	0.964286	intron_variant	FBgn0010238	Lac	ND
2R	8559931	C	C	T	SNP	MA19	1	missense_variant	FBgn0261625	CG42708	ND
2R	8566376	C	C	A	SNP	MA24	1	intron_variant	FBgn0261625	CG42708	ND
2R	8590246	C	C	G	SNP	MA04	1	intergenic_region	-	-	ND
2R	8689439	T---------A	TTAAAAAAAAA	T---------T	COMPLEX	MA01	0.736842	3_prime_UTR_variant	FBgn0003326	sca	ND
2R	8850819	G	G	A	SNP	MA19	1	intergenic_region	-	-	ND
2R	8879267	G	G	A	SNP	MA11	0.285714	intergenic_region	-	-	ND
2R	8883505	A	A	T	SNP	MA16	0.5	upstream_gene_variant	FBgn0265623	Su_z_2	ND
2R	8938232	AA	AA	A-	DEL	MA17	0.733333	intergenic_region	-	-	ND
2R	9084745	G	G	A	SNP	MA05	0.72	intron_variant	FBgn0053182	Kdm4B	ND
2R	9105008	T------	T------	TTAGCTA	INS	MA18	1	intron_variant	FBgn0033809	CG4630	ND
2R	9172441	A	A	T	SNP	MA24	1	intron_variant	FBgn0052843	Dh31-R	ND
2R	9241997	A--TTT	A--TTT	AAATTG	COMPLEX	MA12	0.869565	5_prime_UTR_variant	FBgn0033828	CG17048	ND
2R	9329420	C	C	G	SNP	MA20	0.526316	missense_variant	FBgn0013765	cnn	ND
2R	9341101	G	G	A	SNP	MA17	0.923077	downstream_gene_variant	FBgn0086757	cbs	ND
2R	9384861	C	C	T	SNP	MA17	0.466667	intron_variant	FBgn0004638	drk	ND
2R	9399938	G	G	T	SNP	MA01	0.238095	missense_variant	FBgn0033846	mip120	ND
2R	9445196	T	T	G	SNP	MA04	0.25	upstream_gene_variant	FBgn0083006	snoRNA:Psi28S-1153	ND
2R	9529632	G	A	G	SNP	MA17	0.820513	intron_variant	FBgn0000633	fas	ND
2R	9664154	GCCCG	GCCCG	G----	DEL	MA07	0.266667	intron_variant	FBgn0033867	Cpr50Ca	ND
2R	9807599	G	G	A	SNP	MA25	0.621622	intron_variant	FBgn0013733	shot	ND
2R	9863958	C	C	T	SNP	MA18	1	missense_variant	FBgn0033889	CG6701	ND
2R	9875182	G	G	A	SNP	MA20	0.346154	3_prime_UTR_variant	FBgn0020620	RN-tre	ND
2R	10028502	G	G	A	SNP	MA19	0.947368	upstream_gene_variant	FBgn0040752	Prosap	ND
2R	10030280	T	T	A	SNP	MA22	0.342105	intergenic_region	-	-	ND
2R	10124971	C	C	G	SNP	MA07	1	missense_variant	FBgn0033915	CG8485	ND
2R	10396292	CTTGGGCAAGACC	CTTGGGCAAGACC	C------------	DEL	MA15	0.511628	inframe_deletion	FBgn0261823	Asx	ND
2R	10577445	G	G	T	SNP	MA16	0.377358	intron_variant	FBgn0020269	mspo	ND
2R	11053226	C	C	T	SNP	MA01	1	intron_variant	FBgn0013467	igl	ND
2R	11067651	T	T	G	SNP	MA05	0.257143	intron_variant	FBgn0013467	igl	ND
2R	11074580	G	G	A	SNP	MA07	0.306122	intron_variant	FBgn0013467	igl	ND
2R	11239405	T	T	C	SNP	MA17	0.264151	intron_variant	FBgn0034013	unc-5	ND
2R	11435099	C	C	T	SNP	MA01	0.34375	intron_variant	FBgn0034030	CG8192	ND
2R	11558373	G	G	T	SNP	MA20	0.208333	intron_variant	FBgn0023441	fus	ND
2R	11675806	G	G	T	SNP	MA20	0.555556	intron_variant	FBgn0265991	Zasp52	ND
2R	11708953	A	A	C	SNP	MA01	0.756098	intron_variant	FBgn0034046	tun	ND
2R	11753725	T	T	A	SNP	MA07	0.48	missense_variant	FBgn0050085	Rif1	ND
2R	12188334	T	T	A	SNP	MA19	0.970588	non_coding_exon_variant	FBgn0266767	CR45232	ND
2R	12421766	CG	CG	C-	DEL	MA10	0.964286	upstream_gene_variant	FBgn0259795	loopin-1	ND
2R	12535320	A	A	T	SNP	MA10	0.257143	missense_variant	FBgn0024232	gprs	ND
2R	12576625	G	G	A	SNP	MA13	0.975309	intron_variant	FBgn0050463	CG30463	ND
2R	12641673	A	A	G	SNP	MA19	1	intron_variant	FBgn0267002	unc-104	ND
2R	12662707	T	T	C	SNP	MA19	0.945946	synonymous_variant	FBgn0011743	Arp53D	ND
2R	12705003	G	G	C	SNP	MA10	0.622222	3_prime_UTR_variant	FBgn0034160	CG5550	ND
2R	12724242	GG	GG	G-	DEL	MA24	1	non_coding_exon_variant	FBgn0263659	CR43650	ND
2R	12756421	G	G	A	SNP	MA02	0.416667	stop_gained	FBgn0028737	Ef1beta	No	GTACTCCTCTGCCCCAGTTG	ACTTGAGAGAGCCAGCAAGC
2R	12817147	C	C	T	SNP	MA19	1	intron_variant	FBgn0003091	Pkc53E	ND
2R	13023028	G	G	T	SNP	MA18	0.666667	upstream_gene_variant	FBgn0265541	CR44391	ND
2R	13192782	A--	AAT	T--	COMPLEX	MA11	0.227273	intron_variant	FBgn0265487	mbl	ND
2R	13473810	A-	A-	TC	COMPLEX	MA18	0.964286	upstream_gene_variant	FBgn0034248	CG14483	ND
2R	13548482	A	A	G	SNP	MA10	1	intron_variant	FBgn0050106	CCHa1-R	ND
2R	13630271	A	A	T	SNP	MA10	0.333333	missense_variant	FBgn0034271	CG4996	ND
2R	13660641	C	C	T	SNP	MA14	0.21875	upstream_gene_variant	FBgn0028740	CG6362	ND
2R	13708439	T	T	C	SNP	MA19	1	intron_variant	FBgn0259211	grh	ND
2R	14039609	A	A	C	SNP	MA02	1	missense_variant	FBgn0000057	adp	ND
2R	14138250	CT	CT	AG	MNP	MA01	0.487179	intergenic_region	-	-	ND
2R	14190749	AG-------	AGCTTGTTG	TG-------	COMPLEX	MA03	0.32	3_prime_UTR_variant	FBgn0034327	CG14505	ND
2R	14343380	C	C	G	SNP	MA17	1	downstream_gene_variant	FBgn0028496	CG30116	ND
2R	14352705	A	A	G	SNP	MA16	0.46875	intron_variant	FBgn0028496	CG30116	ND
2R	14404037	G	G	A	SNP	MA06	0.25	intron_variant	FBgn0262476	CG43066	ND
2R	14532883	CTGCTGCAGTTGCTGATGC	CTGCTGCAGTTGCTGATGC	C------------------	DEL	MA14	0.24	intron_variant	FBgn0034371	SP2637	ND
2R	14549858	G	G	T	SNP	MA13	0.261538	upstream_gene_variant	FBgn0034372	Gint3	ND
2R	14582302	T	T	C	SNP	MA12	0.475	intron_variant	FBgn0262103	Sik3	ND
2R	14587963	G	G	A	SNP	MA24	1	synonymous_variant	FBgn0262103	Sik3	ND
2R	14698512	G	G	A	SNP	MA02	1	intron_variant	FBgn0034394	CG15096	ND
2R	14746284	C	C	T	SNP	MA15	0.206897	upstream_gene_variant	FBgn0034405	Jheh2	ND
2R	14807793	TA	TA	AT	MNP	MA19	0.947368	intron_variant	FBgn0034408	sano	ND
2R	14835163	T	T	C	SNP	MA01	1	5_prime_UTR_variant	FBgn0034408	sano	ND
2R	14836010	A	A	T	SNP	MA14	0.384615	intron_variant	FBgn0034408	sano	ND
2R	15106642	T	T	G	SNP	MA22	1	intron_variant	FBgn0263395	hppy	ND
2R	15158347	G	G	T	SNP	MA24	0.217391	intron_variant	FBgn0003254	rib	ND
2R	15245186	G	G	A	SNP	MA06	0.377358	5_prime_UTR_variant	FBgn0034436	CG11961	ND
2R	15294398	C	C	A	SNP	MA19	1	intron_variant	FBgn0263391	hts	ND
2R	15395334	G	G	A	SNP	MA25	0.966667	upstream_gene_variant	FBgn0034456	Ir56b	ND
2R	15451763	C	C	T	SNP	MA12	0.25	intron_variant	FBgn0003435	sm	ND
2R	15493214	G	G	A	SNP	MA10	0.485714	intron_variant	FBgn0003435	sm	ND
2R	15529675	C	C	T	SNP	MA20	0.25	upstream_gene_variant	FBgn0034461	CG15124	ND
2R	15541994	A	A	G	SNP	MA07	0.978261	downstream_gene_variant	FBgn0265144	CR44213	ND
2R	15610993	A	A	C	SNP	MA10	0.763158	intergenic_region	-	-	ND
2R	15763786	G	G	A	SNP	MA01	0.971429	intergenic_region	-	-	ND
2R	15769936	TT	TT	T-	DEL	MA19	0.263158	intergenic_region	-	-	ND
2R	15988673	TGTT	TGTT	T---	DEL	MA03	0.684211	intergenic_region	-	-	ND
2R	16033752	C	C	G	SNP	MA14	0.272727	missense_variant	FBgn0034481	CG11041	ND
2R	16055465	TCGACTTTTTT-	TCGACTTTTTTT	ACGACTTTTTTT	SNP	MA06	0.403846	intergenic_region	-	-	ND
2R	16062308	G	G	C	SNP	MA10	0.53125	intergenic_region	-	-	ND
2R	16083291	GAT	GAT	G--	DEL	MA19	0.222222	intergenic_region	-	-	ND
2R	16145074	A	A	T	SNP	MA25	0.973684	upstream_gene_variant	FBgn0025720	Ate1	ND
2R	16146333	G	G	T	SNP	MA09	0.359375	synonymous_variant	FBgn0034491	Hsl	ND
2R	16220670	C	C	A	SNP	MA07	0.22449	intergenic_region	-	-	ND
2R	16288792	C	C	A	SNP	MA24	0.952381	intergenic_region	-	-	ND
2R	16344571	G	G	A	SNP	MA01	0.342857	intron_variant	FBgn0086604	CG12484	ND
2R	16376432	CGAAAACAC	CGAAAACAC	C--------	DEL	MA17	1	intergenic_region	-	-	ND
2R	16428627	G	G	C	SNP	MA14	0.791667	non_coding_exon_variant	FBgn0265863	CR44652	ND
2R	16452975	C	C	G	SNP	MA06	0.38806	missense_variant	FBgn0028622	qsm	ND
2R	16466758	C	C	A	SNP	MA16	0.959184	intron_variant	FBgn0028622	qsm	ND
2R	16471154	C	C	T	SNP	MA19	0.909091	upstream_gene_variant	FBgn0028622	qsm	ND
2R	16567607	T	T	A	SNP	MA03	1	intergenic_region	-	-	ND
2R	16567627	G	G	A	SNP	MA03	1	intergenic_region	-	-	ND
2R	16700368	C	C	A	SNP	MA07	0.246154	intergenic_region	-	-	ND
2R	16814453	ATT	ATT	A--	DEL	MA15	0.438596	intron_variant	FBgn0020617	Rx	ND
2R	16855047	A	A	T	SNP	MA05	0.3	intergenic_region	-	-	ND
2R	16881613	C	C	T	SNP	MA05	0.205882	synonymous_variant	FBgn0034569	dgt3	ND
2R	16894067	AAG	A-G	A-C	SNP	MA20	0.272727	3_prime_UTR_variant	FBgn0034570	CG10543	ND
2R	17030835	G	G	A	SNP	MA22	0.307692	upstream_gene_variant	FBgn0021872	Xbp1	ND
2R	17092290	G	G	C	SNP	MA10	0.25	missense_variant	FBgn0265191	Glycogenin	ND
2R	17193400	G	G	A	SNP	MA16	0.565217	missense_variant	FBgn0261554	CG42672	ND
2R	17391338	A	A	T	SNP	MA24	0.969697	intron_variant	FBgn0043070	MESK2	ND
2R	17397992	A	A	G	SNP	MA05	0.970588	intron_variant	FBgn0043070	MESK2	ND
2R	17437766	G-AT-----	G-AT-----	GCATTAGCT	COMPLEX	MA06	0.206897	intron_variant	FBgn0003731	Egfr	ND
2R	17479961	A	A	C	SNP	MA13	0.822222	downstream_gene_variant	FBgn0053225	CG33225	ND
2R	17485415	C	C	G	SNP	MA02	0.892857	intergenic_region	-	-	No	GTGAAAGTATCGGGCAATCG	TGGCAATGCAACAAGTCATT
2R	17550108	A--A--AAG-	A--A--AAG-	ATGATGATGG	COMPLEX	MA20	0.222222	intron_variant	FBgn0034647	pirk	ND
2R	17591472	T	T	A	SNP	MA16	0.543478	intron_variant	FBgn0010228	HmgZ	ND
2R	17682103	G	G	T	SNP	MA10	0.340909	intergenic_region	-	-	ND
2R	17799463	TT	TT	T-	DEL	MA19	1	intron_variant	FBgn0085397	Fili	ND
2R	17846244	GCCGCCGCCGCCGCCG	GCCGCCG---------	ACCGCCG---------	SNP	MA19	1	intergenic_region	-	-	ND
2R	17927635	T	T	C	SNP	MA09	1	upstream_gene_variant	FBgn0085399	CG34370	ND
2R	17987302	TT--	AT--	TTAT	COMPLEX	MA08	0.9375	upstream_gene_variant	FBgn0034693	CG11073	ND
2R	18040646	GGTTT	GGCTC	G-CTC	DEL	MA11	1	intron_variant	FBgn0000008	a	ND
2R	18151292	TATGTGAA	TGTGTTGG	T-TG---G	COMPLEX	MA10	0.875	intron_variant	FBgn0020307	dve	ND
2R	18167890	G	G	A	SNP	MA04	1	intron_variant	FBgn0020307	dve	ND
2R	18286580	T	T	A	SNP	MA18	0.96	intron_variant	FBgn0034724	babos	ND
2R	18291976	T	T	A	SNP	MA10	0.214286	intron_variant	FBgn0034725	CG6044	ND
2R	18318172	G	G	A	SNP	MA25	0.285714	intergenic_region	-	-	ND
2R	18331800	CATCCCACTCCTTCCGACTCC	C--------------------	CATCCCACTCCATCCCACTCC	INS	MA24	0.222222	intergenic_region	-	-	ND
2R	18337068	C	C	T	SNP	MA22	0.410256	intergenic_region	-	-	ND
2R	18352642	C	C	G	SNP	MA15	0.720588	intron_variant	FBgn0034731	CG10384	ND
2R	18366829	T	T	C	SNP	MA11	0.405405	intron_variant	FBgn0034733	CG4752	ND
2R	18666147	G	G	A	SNP	MA01	0.55814	intron_variant	FBgn0259145	CG42260	ND
2R	18677648	A	A	G	SNP	MA12	0.568627	intron_variant	FBgn0259145	CG42260	ND
2R	18719210	G	G	C	SNP	MA24	0.882353	missense_variant	FBgn0050272	CG30272	ND
2R	18730588	TTTATATA--	ATTGTATA--	ATTGTATATA	INS	MA14	0.958333	downstream_gene_variant	FBgn0034784	CG9826	ND
2R	18765869	A	A	C	SNP	MA20	0.28	missense_variant	FBgn0034789	PIP5K59B	ND
2R	18822991	C-A-----	C-A-----	CTACCTCC	COMPLEX	MA01	0.380952	3_prime_UTR_variant	FBgn0034802	CG3800	ND
2R	18965699	G	G	A	SNP	MA16	0.431818	synonymous_variant	FBgn0034817	Art7	ND
2R	19083367	A	A	C	SNP	MA12	1	intron_variant	FBgn0085400	CG34371	ND
2R	19151462	C	C	A	SNP	MA12	0.294118	downstream_gene_variant	FBgn0034838	CG12782	ND
2R	19355320	T	T	G	SNP	MA09	0.416667	intron_variant	FBgn0264339	CG43795	ND
2R	19460509	AAG	AAT	A-T	DEL	MA17	0.972973	intron_variant	FBgn0015903	apt	ND
2R	19550727	G	G	T	SNP	MA20	0.291667	intron_variant	FBgn0266377	Pde8	ND
2R	19650180	G	G	A	SNP	MA25	0.206897	intron_variant	FBgn0034903	CG9850	ND
2R	19730327	C	C	A	SNP	MA12	0.214286	missense_variant	FBgn0003401	shu	ND
2R	19823786	A	A	G	SNP	MA25	0.229167	upstream_gene_variant	FBgn0263006	Ca-P60A	ND
2R	19945313	G	G	A	SNP	MA04	0.971429	upstream_gene_variant	FBgn0034965	ppk29	ND
2R	20150223	G	G	A	SNP	MA17	0.388889	missense_variant	FBgn0034997	CG3376	ND
2R	20182807	C	C	T	SNP	MA10	0.378378	intron_variant	FBgn0034999	CG3394	ND
2R	20203160	CA	CA	AG	MNP	MA12	0.342857	intergenic_region	-	-	ND
2R	20430366	A	C	T	SNP	MA10	0.758621	intron_variant	FBgn0035023	ITP	ND
2R	20465623	AAG	AAC	A-C	DEL	MA17	0.948718	5_prime_UTR_variant	FBgn0053527	SIFa	ND
2R	20689077	AT	AT	G-	COMPLEX	MA24	0.428571	downstream_gene_variant	FBgn0035069	CG3611	ND
2R	20732323	G	G	A	SNP	MA03	1	intergenic_region	-	-	ND
2R	20806467	ATATGCCAAAG	ATATGCCAAAG	A----------	DEL	MA09	1	3_prime_UTR_variant	FBgn0085434	NaCP60E	ND
2R	20893198	G	G	T	SNP	MA22	0.352941	intron_variant	FBgn0265434	zip	ND
2R	20910512	TC	TC	T-	DEL	MA07	0.405797	intron_variant	FBgn0004055	uzip	ND
2R	21066520	G	G	T	SNP	MA15	0.357143	intergenic_region	-	-	ND
3L	77307	AA	AA	A-	DEL	MA19	0.40625	intergenic_region	-	-	ND
3L	257149	C	C	T	SNP	MA06	1	synonymous_variant	FBgn0024806	DIP2	ND
3L	281069	G	G	A	SNP	MA02	0.302326	intron_variant	FBgn0264707	RhoGEF3	ND
3L	357289	G	G	C	SNP	MA14	0.368421	missense_variant	FBgn0035134	CG1231	ND
3L	387840	C	C	G	SNP	MA18	0.978261	intron_variant	FBgn0262139	trh	ND
3L	488687	G	G	T	SNP	MA20	1	intron_variant	FBgn0001316	klar	ND
3L	512518	C	C	G	SNP	MA17	0.984127	intron_variant	FBgn0001316	klar	Yes	GACAATCGAGGAGACCCAGA	TTGTCAAAGCCAGACACGAC
3L	582530	C	C	T	SNP	MA20	0.25	missense_variant	FBgn0035143	Ppm1	ND
3L	658599	CAATCTC	C------	CAATCCC	INS	MA12	0.214286	downstream_gene_variant	FBgn0035150	Rev1	ND
3L	821033	T	T	A	SNP	MA16	0.408163	non_coding_exon_variant	FBgn0264475	CR43883	ND
3L	870008	C	C	T	SNP	MA24	0.809524	synonymous_variant	FBgn0035171	CG12502	ND
3L	1036430	A	A	G	SNP	MA19	0.222222	3_prime_UTR_variant	FBgn0004870	bab1	ND
3L	1123152	G	G	T	SNP	MA05	0.72	intergenic_region	-	-	ND
3L	1154062	C	C	G	SNP	MA07	0.547619	intron_variant	FBgn0025525	bab2	ND
3L	1253298	T	T	G	SNP	MA04	0.268293	splice_region_variant	FBgn0035197	CG9130	ND
3L	1293326	A	A	G	SNP	MA19	0.578947	missense_variant	FBgn0052333	CG32333	ND
3L	1294023	T	T	C	SNP	MA04	0.304348	missense_variant	FBgn0052333	CG32333	ND
3L	1317132	G	G	A	SNP	MA19	0.423077	missense_variant	FBgn0035207	CG9153	ND
3L	1460176	C	C	T	SNP	MA02	1	intron_variant	FBgn0003138	Ptp61F	ND
3L	1533999	T	T	A	SNP	MA06	0.890909	5_prime_UTR_variant	FBgn0035227	CG12090	ND
3L	1623108	T	T	G	SNP	MA24	0.32	3_prime_UTR_variant	FBgn0035244	ABCB7	ND
3L	1636528	T	T	G	SNP	MA11	0.388889	intron_variant	FBgn0013342	nSyb	ND
3L	1689545	A	A	G	SNP	MA02	0.5	5_prime_UTR_variant	FBgn0035260	CG7991	ND
3L	1739476	G	G	C	SNP	MA15	0.304348	intron_variant	FBgn0035266	Gk	ND
3L	1802277	G	G	C	SNP	MA02	0.297297	synonymous_variant	FBgn0025820	JTBR	No	TTTGTCCCCTGAAAACAAGC	CCAGGTTGTTTCCAGCACTT
3L	1890360	C	C	T	SNP	MA11	0.854167	synonymous_variant	FBgn0262624	Tmhs	ND
3L	2017681	C	C	G	SNP	MA24	0.533333	intergenic_region	-	-	ND
3L	2256153	G	G	T	SNP	MA19	0.222222	intron_variant	FBgn0035321	CG1275	ND
3L	2273042	T	T	C	SNP	MA19	0.428571	upstream_gene_variant	FBgn0041709	yellow-g	ND
3L	2377601	G	G	A	SNP	MA13	0.666667	upstream_gene_variant	FBgn0035337	CG15877	ND
3L	2520245	AA--	GA--	AAGA	COMPLEX	MA02	0.75	intron_variant	FBgn0010905	Spn	ND
3L	2565776	A	A	T	SNP	MA11	0.416667	intron_variant	FBgn0010909	msn	No	GAGTGCGTTGCCGAAGTTAT	TGACTTTCAGGCGAGAGAGC
3L	2751057	C	C	G	SNP	MA07	0.323529	intron_variant	FBgn0052296	Mrtf	ND
3L	2836662	G------	GCAGCAG	G------	DEL	MA01	0.366667	intron_variant	FBgn0263392	CG43444	ND
3L	2942501	GCCCCGCT--	GCCCCGCT--	CCCCC-CTCA	COMPLEX	MA04	0.461538	intron_variant	FBgn0262593	Shab	ND
3L	2989972	ATTTCCTG	ATTGCCTA	TTTGCCTA	SNP	MA01	0.447368	intergenic_region	-	-	ND
3L	3029456	A	A	G	SNP	MA19	0.388889	intergenic_region	-	-	ND
3L	3029806	C	C	T	SNP	MA12	0.651163	intergenic_region	-	-	ND
3L	3116735	A-	A-	AA	INS	MA16	0.365854	intron_variant	FBgn0026189	prominin-like	ND
3L	3173092	G	G	A	SNP	MA19	0.4	3_prime_UTR_variant	FBgn0035410	CG14964	ND
3L	3248589	C	C	T	SNP	MA09	0.985294	5_prime_UTR_premature_start_codon_gain_variant	FBgn0263246	CG43389	ND
3L	3535220	GG	GG	G-	DEL	MA11	0.285714	intron_variant	FBgn0005640	Eip63E	No	TTCGAGCGCTTTAAAGTTTTT	TTTGCTTTTGGCAAGGTTCT
3L	3634485	TTC	TTG	T-G	DEL	MA16	0.957447	intron_variant	FBgn0263239	dar1	ND
3L	3694043	T	T	A	SNP	MA03	0.6	non_coding_exon_variant	FBgn0263496	CR43485	ND
3L	3768130	G	G	T	SNP	MA19	0.458333	intron_variant	FBgn0052264	CG32264	ND
3L	3924584	T	T	C	SNP	MA03	0.725	intron_variant	FBgn0004910	Eip63F-1	ND
3L	3950782	C	C	T	SNP	MA10	0.366667	downstream_gene_variant	FBgn0035480	CG14984	ND
3L	3951070	T	T	A	SNP	MA12	0.387097	downstream_gene_variant	FBgn0035480	CG14984	ND
3L	3951095	A	A	G	SNP	MA12	0.428571	downstream_gene_variant	FBgn0035480	CG14984	ND
3L	4046478	C	C	T	SNP	MA18	1	upstream_gene_variant	FBgn0035490	CG1136	ND
3L	4310466	G	G	A	SNP	MA17	1	intergenic_region	-	-	ND
3L	4312801	C	C	T	SNP	MA09	0.914286	upstream_gene_variant	FBgn0052251	Claspin	ND
3L	4424733	C	C	T	SNP	MA10	0.5	missense_variant	FBgn0035543	CG15020	ND
3L	4425939	T	T	A	SNP	MA18	0.289474	intron_variant	FBgn0035543	CG15020	ND
3L	4543238	GTT-	TTT-	TTTT	INS	MA19	0.266667	intron_variant	FBgn0035558	CG11357	ND
3L	4640032	T	T	A	SNP	MA07	1	intron_variant	FBgn0262870	axo	ND
3L	4643124	C	C	T	SNP	MA19	0.238095	missense_variant	FBgn0262870	axo	ND
3L	4657778	C	C	T	SNP	MA02	0.21875	intron_variant	FBgn0262870	axo	ND
3L	4678211	G	G	T	SNP	MA20	0.882353	3_prime_UTR_variant	FBgn0085295	CG34266	ND
3L	4766404	G	G	A	SNP	MA02	0.214286	synonymous_variant	FBgn0035574	RhoGEF64C	ND
3L	4797287	T	T	C	SNP	MA19	0.222222	intergenic_region	-	-	ND
3L	4851338	C	C	A	SNP	MA01	1	missense_variant	FBgn0052237	CG32237	ND
3L	4856152	T	T	G	SNP	MA25	0.97561	intergenic_region	-	-	ND
3L	4875388	G	G	T	SNP	MA10	0.225	intron_variant	FBgn0035581	CG17150	ND
3L	4891300	G	G	T	SNP	MA19	0.25	missense_variant	FBgn0035581	CG17150	ND
3L	4941435	G-	G-	GA	INS	MA05	0.4	intron_variant	FBgn0005775	Con	ND
3L	4954258	T	T	G	SNP	MA01	0.617021	intron_variant	FBgn0005775	Con	ND
3L	5203939	A	A	T	SNP	MA09	0.367347	intron_variant	FBgn0052423	shep	ND
3L	5207305	G	G	A	SNP	MA19	0.222222	intron_variant	FBgn0052423	shep	ND
3L	5280395	G	G	A	SNP	MA11	0.638889	intergenic_region	-	-	ND
3L	5299883	C	C	T	SNP	MA17	0.333333	intergenic_region	-	-	ND
3L	5307210	A	A	T	SNP	MA20	0.95	intergenic_region	-	-	ND
3L	5335001	G	G	A	SNP	MA05	1	upstream_gene_variant	FBgn0011986	tRNA:S7:64D	ND
3L	5384543	GC	GA	AA	SNP	MA02	0.447368	intergenic_region	-	-	No	ATGTCTACTTCCGGCAAAGC	TTCTGTCAGTGTGGCTGTGA
3L	5491070	C	C	G	SNP	MA02	0.692308	missense_variant	FBgn0035608	blanks	ND
3L	5614302	C	C	T	SNP	MA25	0.975	intergenic_region	-	-	ND
3L	5621094	T	T	C	SNP	MA25	1	intergenic_region	-	-	ND
3L	5637478	C	C	T	SNP	MA14	0.357143	missense_variant	FBgn0035625	Blimp-1	ND
3L	5784167	T	T	C	SNP	MA13	0.866667	synonymous_variant	FBgn0086694	Bre1	ND
3L	5882260	G	G	T	SNP	MA09	1	intergenic_region	-	-	ND
3L	5936646	C	C	T	SNP	MA18	0.341463	intron_variant	FBgn0053993	CG33993	ND
3L	5962098	C	C	A	SNP	MA16	0.719298	missense_variant	FBgn0035656	CG10479	ND
3L	6004674	C	C	T	SNP	MA11	0.769231	intron_variant	FBgn0052406	PVRAP	ND
3L	6031040	AT	AT	TA	MNP	MA08	0.204545	missense_variant	FBgn0035663	CG6462	ND
3L	6211353	G	G	A	SNP	MA05	0.444444	upstream_gene_variant	FBgn0002526	LanA	ND
3L	6320914	G	G	C	SNP	MA16	0.282609	missense_variant	FBgn0041623	Or65c	ND
3L	6386209	G	G	C	SNP	MA02	0.289474	intergenic_region	-	-	ND
3L	6426487	C	C	A	SNP	MA03	0.76	intron_variant	FBgn0261801	CG42747	ND
3L	6503777	T	T	A	SNP	MA24	1	intron_variant	FBgn0020251	sfl	Yes	TGGCCACCATTAGGAAAGAA	TAGGATGCCAAAAAGCCAAC
3L	6515680	C	C	T	SNP	MA08	0.777778	intron_variant	FBgn0020251	sfl	ND
3L	6593128	C	C	T	SNP	MA22	0.818182	synonymous_variant	FBgn0002926	ndl	ND
3L	6665880	G	G	T	SNP	MA17	0.230769	intergenic_region	-	-	Yes	GGCAGGAGTGGGGAATAACT	CAGGCATTCACTTGGCATTA
3L	6699907	G	G	T	SNP	MA05	0.36	intron_variant	FBgn0035711	CG8519	ND
3L	6816994	G	G	A	SNP	MA03	0.952381	intergenic_region	-	-	ND
3L	6847934	TTC	TTG	T-G	DEL	MA25	0.97561	intergenic_region	-	-	ND
3L	6991810	A	C	T	SNP	MA24	0.823529	upstream_gene_variant	FBgn0260660	Mp	ND
3L	7107128	G	G	A	SNP	MA25	1	intron_variant	FBgn0053556	form3	ND
3L	7133507	A	A	G	SNP	MA05	0.28125	synonymous_variant	FBgn0023001	melt	ND
3L	7213936	C	C	A	SNP	MA22	0.788462	intergenic_region	-	-	ND
3L	7274025	T	T	G	SNP	MA02	0.692308	intron_variant	FBgn0035756	unc-13-4A	ND
3L	7274972	TG	TG	AA	MNP	MA12	0.969697	intron_variant	FBgn0035756	unc-13-4A	ND
3L	7345351	G	G	C	SNP	MA16	0.290909	missense_variant	FBgn0019662	qm	ND
3L	7358901	CG	CG	GA	MNP	MA01	0.538462	missense_variant	FBgn0035772	Sh3beta	ND
3L	7479638	C	C	A	SNP	MA17	0.36	missense_variant	FBgn0035789	mthl6	ND
3L	7546645	C	C	T	SNP	MA20	0.84	intergenic_region	-	-	ND
3L	7588242	T	T	G	SNP	MA07	0.294118	intron_variant	FBgn0035802	CG33275	ND
3L	7616422	C	C	T	SNP	MA18	0.381818	intron_variant	FBgn0035802	CG33275	ND
3L	7844412	C	C	A	SNP	MA07	0.347826	intron_variant	FBgn0016694	Pdp1	ND
3L	7870794	G	G	A	SNP	MA19	0.230769	intron_variant	FBgn0052365	CG32365	ND
3L	7923598	C	C	T	SNP	MA11	0.891892	synonymous_variant	FBgn0024187	syd	ND
3L	7931162	A	A	G	SNP	MA11	0.787879	downstream_gene_variant	FBgn0035827	Srp9	ND
3L	7945081	A	A	T	SNP	MA09	0.37037	downstream_gene_variant	FBgn0041156	exex	ND
3L	8036603	C	C	G	SNP	MA24	0.619048	intron_variant	FBgn0011817	nmo	ND
3L	8146695	A	A	C	SNP	MA16	0.592593	intergenic_region	-	-	ND
3L	8205805	C	C	T	SNP	MA11	0.8	synonymous_variant	FBgn0035857	CG8006	ND
3L	8209963	C	C	A	SNP	MA01	0.627907	downstream_gene_variant	FBgn0040832	CG8012	ND
3L	8250415	G	G	C	SNP	MA11	0.95	intron_variant	FBgn0263219	Dscam4	ND
3L	8269227	T	T	C	SNP	MA05	1	missense_variant	FBgn0263219	Dscam4	ND
3L	8348454	G	G	C	SNP	MA07	0.324324	missense_variant	FBgn0035880	CG17352	ND
3L	8427569	C	C	A	SNP	MA19	0.47619	stop_lost	FBgn0263352	Unr	ND
3L	8443575	ACAA	ACAA	A---	DEL	MA04	1	intron_variant	FBgn0010825	Gug	ND
3L	8489797	G	G	C	SNP	MA19	0.35	intron_variant	FBgn0262719	CG43163	ND
3L	8542086	GTT	ATA	A--	DEL	MA12	0.45	intron_variant	FBgn0260442	rhea	ND
3L	8576947	G	G	A	SNP	MA11	0.724138	intron_variant	FBgn0262508	CG43078	ND
3L	8674504	T	T	A	SNP	MA11	0.541667	intergenic_region	-	-	ND
3L	8712190	G	G	T	SNP	MA19	0.477273	3_prime_UTR_variant	FBgn0011509	SrpRbeta	ND
3L	8908548	A	A	G	SNP	MA09	0.953488	non_coding_exon_variant	FBgn0264701	CR43970	ND
3L	8927762	T	T	G	SNP	MA04	0.540541	splice_region_variant	FBgn0264305	CG43783	ND
3L	8991540	C	C	A	SNP	MA18	0.25	5_prime_UTR_premature_start_codon_gain_variant	FBgn0035953	CG5087	ND
3L	9017061	A	A	G	SNP	MA19	0.4375	intergenic_region	-	-	ND
3L	9063619	C	C	T	SNP	MA19	0.214286	synonymous_variant	FBgn0035959	CG4911	ND
3L	9117003	C	C	T	SNP	MA01	0.785714	intron_variant	FBgn0011206	bol	ND
3L	9160945	G	G	T	SNP	MA19	0.4	intron_variant	FBgn0004244	Rdl	ND
3L	9165281	G	G	A	SNP	MA19	0.25	intron_variant	FBgn0004244	Rdl	ND
3L	9247827	C	C	A	SNP	MA16	0.27027	intron_variant	FBgn0264000	GluRIB	ND
3L	9275418	C	C	G	SNP	MA07	0.354167	intron_variant	FBgn0264000	GluRIB	ND
3L	9282960	C	C	T	SNP	MA16	0.324324	intergenic_region	-	-	ND
3L	9302802	C	C	G	SNP	MA03	0.695652	intergenic_region	-	-	ND
3L	9339938	C	C	G	SNP	MA14	0.742857	missense_variant	FBgn0035976	PGRP-LC	ND
3L	9342285	A	A	T	SNP	MA13	0.958333	upstream_gene_variant	FBgn0035977	PGRP-LF	Yes	GTAAGTTTGCCTGGGGGTTT	GTACGCACCCGATCTCAAGT
3L	9366757	T-TTTT	T-TT--	TCTT-T	COMPLEX	MA09	0.230769	3_prime_UTR_variant	FBgn0001228	Hsp67Bb	ND
3L	9420685	G	G	C	SNP	MA08	1	synonymous_variant	FBgn0015296	Shc	ND
3L	9473940	A	A	G	SNP	MA19	0.409091	missense_variant	FBgn0036004	Jarid2	ND
3L	9479479	A	A	T	SNP	MA17	0.980769	3_prime_UTR_variant	FBgn0036004	Jarid2	ND
3L	9743073	C	C	G	SNP	MA15	0.369565	intron_variant	FBgn0259163	CG42268	ND
3L	9749416	C	C	T	SNP	MA06	0.866667	intron_variant	FBgn0259163	CG42268	ND
3L	9824678	G	G	T	SNP	MA15	0.295455	intron_variant	FBgn0264489	CG43897	ND
3L	9931996	TTGTCGCCTA	TTGTCGCATG	ATGTCGCATG	SNP	MA14	0.957447	intron_variant	FBgn0085385	CG34356	ND
3L	9967655	T	T	A	SNP	MA01	0.95122	upstream_gene_variant	FBgn0040823	dpr6	ND
3L	10018144	T	T	C	SNP	MA19	0.735294	intron_variant	FBgn0040823	dpr6	ND
3L	10070032	G	G	A	SNP	MA14	0.285714	intron_variant	FBgn0040823	dpr6	ND
3L	10073861	C	C	T	SNP	MA19	0.530612	intron_variant	FBgn0040823	dpr6	ND
3L	10156431	G	G	A	SNP	MA02	0.454545	intron_variant	FBgn0052057	dpr10	ND
3L	10167710	G	G	C	SNP	MA03	0.205128	intron_variant	FBgn0052057	dpr10	ND
3L	10519665	C	C	A	SNP	MA25	1	intron_variant	FBgn0052062	A2bp1	ND
3L	10580361	A-	A-	AA	INS	MA14	0.903226	intron_variant	FBgn0052062	A2bp1	ND
3L	10658385	C	C	A	SNP	MA06	0.309091	5_prime_UTR_variant	FBgn0010762	simj	ND
3L	10820361	T	T	G	SNP	MA13	0.224719	intergenic_region	-	-	ND
3L	10844832	AC	AC	A-	DEL	MA24	0.263158	intergenic_region	-	-	ND
3L	10943106	C	C	T	SNP	MA01	0.891892	intergenic_region	-	-	ND
3L	10997206	A---------	A---------	ACCAGCACCA	INS	MA22	0.333333	intron_variant	FBgn0013469	klu	ND
3L	11128330	G	G	A	SNP	MA08	0.21875	synonymous_variant	FBgn0036138	CG14143	ND
3L	11156306	A	A	G	SNP	MA15	0.469388	3_prime_UTR_variant	FBgn0052082	CG32082	ND
3L	11189951	A-AAAAAA-	A-AAAAAAA	ATAAAAAA-	COMPLEX	MA12	1	5_prime_UTR_variant	FBgn0036144	GlcAT-P	ND
3L	11278492	TCGATTAATTTTTC	TCGATTTATTTTTT	ACGATTTATTTTTT	SNP	MA17	0.972973	downstream_gene_variant	FBgn0266953	CR45404	ND
3L	11288770	G	G	A	SNP	MA17	0.977273	5_prime_UTR_variant	FBgn0036152	CG6175	ND
3L	11346347	G	G	A	SNP	MA10	0.219512	intergenic_region	-	-	ND
3L	11373903	T	T	C	SNP	MA16	0.689655	intergenic_region	-	-	ND
3L	11422609	A	A	G	SNP	MA12	0.296296	intergenic_region	-	-	ND
3L	11422624	C	C	G	SNP	MA12	0.285714	intergenic_region	-	-	ND
3L	11462217	T	T	C	SNP	MA08	0.441176	intergenic_region	-	-	ND
3L	11512756	T	T	C	SNP	MA04	0.724138	missense_variant	FBgn0036169	Fuca	ND
3L	11514444	T------ATATA	T------ATATG	TGTATATATATG	INS	MA15	0.487179	3_prime_UTR_variant	FBgn0036170	CG11714	ND
3L	11523774	G	G	A	SNP	MA14	0.25	intron_variant	FBgn0259481	Mob2	ND
3L	11566256	A	A	C	SNP	MA02	0.575758	missense_variant	FBgn0053490	CG33490	ND
3L	11724264	C	C	T	SNP	MA02	0.377778	missense_variant	FBgn0052088	CG32088	ND
3L	11737451	A	A	T	SNP	MA12	0.24	intron_variant	FBgn0036202	CG6024	ND
3L	11769753	A	A	T	SNP	MA19	0.73913	intron_variant	FBgn0015278	Pi3K68D	ND
3L	11788659	G	G	T	SNP	MA25	0.678571	upstream_gene_variant	FBgn0004381	Klp68D	ND
3L	11918387	G	G	C	SNP	MA18	0.82	intron_variant	FBgn0266100	CG44837	ND
3L	12218898	G	G	C	SNP	MA04	0.361111	intron_variant	FBgn0260941	app	ND
3L	12309153	T---	T-TA	TTTA	INS	MA17	0.4	intergenic_region	-	-	ND
3L	12329481	C	C	T	SNP	MA13	0.322581	upstream_gene_variant	FBgn0036277	CG10418	ND
3L	12347473	G	G	A	SNP	MA19	0.833333	intergenic_region	-	-	ND
3L	12418066	A	A	C	SNP	MA12	0.970588	intron_variant	FBgn0036285	toe	ND
3L	12487785	G	G	C	SNP	MA18	0.740741	intron_variant	FBgn0036289	CG10657	ND
3L	12750233	A	A	G	SNP	MA19	0.72093	missense_variant	FBgn0052113	CG32113	ND
3L	12870596	G	G	A	SNP	MA02	0.205882	intergenic_region	-	-	ND
3L	13073254	C	C	T	SNP	MA15	0.322581	intergenic_region	-	-	ND
3L	13102689	A	A	C	SNP	MA16	0.714286	intergenic_region	-	-	ND
3L	13128721	G	G	A	SNP	MA22	0.357143	upstream_gene_variant	FBgn0053262	CG33262	ND
3L	13172288	A	A	C	SNP	MA11	0.515152	intergenic_region	-	-	ND
3L	13253513	G	G	T	SNP	MA19	0.409091	intron_variant	FBgn0023095	caps	ND
3L	13467519	C	C	A	SNP	MA03	0.205882	5_prime_UTR_premature_start_codon_gain_variant	FBgn0036369	CG10089	ND
3L	13497359	C	C	T	SNP	MA24	0.225806	synonymous_variant	FBgn0036374	Spt20	ND
3L	13542887	A-	A-	AA	INS	MA07	0.96875	intron_variant	FBgn0264001	bru-3	ND
3L	13553950	AATTTAATGTCGAGTGAGATGA	AATTTAATGTCGAGTGAGATGA	A---------------------	DEL	MA04	0.52381	intron_variant	FBgn0264001	bru-3	ND
3L	13647846	A	A	G	SNP	MA16	0.282051	intron_variant	FBgn0264001	bru-3	ND
3L	13674584	A	A	C	SNP	MA13	0.508197	intron_variant	FBgn0264001	bru-3	ND
3L	13785923	G	G	C	SNP	MA14	0.972973	intron_variant	FBgn0264001	bru-3	ND
3L	13792429	A	A	C	SNP	MA17	1	intron_variant	FBgn0264001	bru-3	Yes	TGGCCCAGAAGAAAATGAAG	CAAAAACCTAGTCGGGCGTA
3L	14070046	C--	C--	CCC	INS	MA07	0.895833	intron_variant	FBgn0005592	btl	ND
3L	14196924	C--	C--	CTA	INS	MA04	0.477273	frameshift_variant	FBgn0052141	CG32141	ND
3L	14347622	A	A	T	SNP	MA03	0.758621	intron_variant	FBgn0001085	fz	ND
3L	14348642	A-----AA-AG--	A-----AA-AG--	ATATAGAATAGAA	COMPLEX	MA02	0.45	intron_variant	FBgn0001085	fz	ND
3L	14445851	C	C	T	SNP	MA11	0.269231	intron_variant	FBgn0087007	bbg	ND
3L	14670399	A	A	T	SNP	MA15	0.45614	intron_variant	FBgn0036436	CG4914	ND
3L	14755059	A	A	C	SNP	MA12	0.6	upstream_gene_variant	FBgn0053260	CG33260	ND
3L	14764920	C	C	T	SNP	MA01	1	missense_variant	FBgn0036448	mop	ND
3L	14805174	G	G	A	SNP	MA08	0.96875	intron_variant	FBgn0036454	CG17839	ND
3L	14864380	A	A	G	SNP	MA19	0.548387	intron_variant	FBgn0036454	CG17839	ND
3L	14897901	C	C	T	SNP	MA10	0.857143	missense_variant	FBgn0259099	DCX-EMAP	ND
3L	14912061	G	G	A	SNP	MA11	0.294118	intron_variant	FBgn0259099	DCX-EMAP	No	TGCAATGCAAAATGCTGACT	TTTACACGGCTCACCCCTAC
3L	14978748	AAAAAT	CAAAAG	CAAAAA	SNP	MA25	0.53125	intron_variant	FBgn0002778	mnd	ND
3L	15070956	G------------	G------------	GATGCAGCATCAG	INS	MA18	0.351852	inframe_insertion	FBgn0036474	Or71a	ND
3L	15202880	C	C	T	SNP	MA03	0.454545	intergenic_region	-	-	ND
3L	15334056	G	G	A	SNP	MA12	0.242424	synonymous_variant	FBgn0036494	Toll-6	ND
3L	15389039	G	G	C	SNP	MA03	0.782609	intergenic_region	-	-	ND
3L	15423118	G	G	A	SNP	MA14	0.978723	intergenic_region	-	-	ND
3L	15425774	TATTTTT	TATTTTT	T------	DEL	MA01	0.25	intergenic_region	-	-	ND
3L	15462993	G	G	C	SNP	MA11	0.48	intergenic_region	-	-	ND
3L	15559114	G	G	A	SNP	MA20	0.913043	5_prime_UTR_variant	FBgn0036511	CG6498	ND
3L	15666607	G	G	T	SNP	MA08	0.411765	intergenic_region	-	-	ND
3L	16083025	C	C	T	SNP	MA24	1	missense_variant	FBgn0036565	CG5235	ND
3L	16115639	G	G	A	SNP	MA19	0.548387	missense_variant	FBgn0036571	CG12272	ND
3L	16145047	T	T	C	SNP	MA01	0.5	intron_variant	FBgn0036576	CG5151	ND
3L	16248276	C	C	A	SNP	MA12	0.581395	downstream_gene_variant	FBgn0036584	CG13054	ND
3L	16299913	C	C	T	SNP	MA18	0.27451	synonymous_variant	FBgn0036601	CG13063	ND
3L	16349805	C	C	T	SNP	MA09	0.777778	intron_variant	FBgn0266417	CG45057	ND
3L	16463303	C	C	T	SNP	MA22	0.40625	intron_variant	FBgn0053158	CG33158	ND
3L	16532509	AAA	AAG	A--	DEL	MA11	0.375	intron_variant	FBgn0263131	CG43373	ND
3L	16536648	C	C	T	SNP	MA22	0.533333	upstream_gene_variant	FBgn0263131	CG43373	ND
3L	16660662	T	T	A	SNP	MA04	0.781818	intron_variant	FBgn0010223	Galphaf	ND
3L	16741928	G	G	T	SNP	MA11	0.454545	intergenic_region	-	-	ND
3L	16763658	T	T	C	SNP	MA13	0.258065	intron_variant	FBgn0004108	Nrt	ND
3L	16794664	C	C	G	SNP	MA12	0.233333	intron_variant	FBgn0036663	CG9674	ND
3L	16839057	ACCCAAAAATGTA	ACCCAAAAATTTA	A------------	DEL	MA13	0.6	intron_variant	FBgn0036668	CG9715	ND
3L	16902743	T	T	C	SNP	MA19	0.666667	intron_variant	FBgn0261565	Lmpt	ND
3L	16902780	C	C	A	SNP	MA24	0.84	intron_variant	FBgn0261565	Lmpt	ND
3L	16928887	G	G	A	SNP	MA04	0.68	upstream_gene_variant	FBgn0036678	CG11905	ND
3L	16975958	A	A	G	SNP	MA07	0.97561	synonymous_variant	FBgn0261547	Exn	ND
3L	17031658	T	T	C	SNP	MA20	0.966667	missense_variant	FBgn0261872	scaf6	ND
3L	17193259	A	A	T	SNP	MA09	1	intron_variant	FBgn0260943	Rbp6	ND
3L	17327085	T	T	A	SNP	MA17	0.795455	upstream_gene_variant	FBgn0265756	CR44563	ND
3L	17676461	T	T	A	SNP	MA07	0.62963	3_prime_UTR_variant	FBgn0085280	CG34251	ND
3L	17872761	AA	A-	AA	INS	MA01	0.964286	intron_variant	FBgn0036765	CG7408	ND
3L	17887968	T	T	C	SNP	MA16	0.722222	intron_variant	FBgn0036769	Tsp74F	ND
3L	17902533	TTT	TTT	T--	DEL	MA07	0.930233	frameshift_variant	FBgn0036771	CG14353	ND
3L	17946163	C	C	A	SNP	MA17	1	3_prime_UTR_variant	FBgn0000568	Eip75B	Yes	AGCTTTGTGCCAAAGGAGAA	TGAAAGCAAAACCAACATGC
3L	18012330	A	A	T	SNP	MA15	0.41791	intron_variant	FBgn0000568	Eip75B	ND
3L	18195234	T	T	C	SNP	MA19	0.64	missense_variant	FBgn0036782	CG7320	ND
3L	18269092	A	A	T	SNP	MA06	1	intergenic_region	-	-	ND
3L	18318654	G	G	C	SNP	MA19	0.545455	intergenic_region	-	-	ND
3L	18589708	A	A	C	SNP	MA08	0.965517	non_coding_exon_variant	FBgn0266938	CR45389	ND
3L	18630522	T	T	C	SNP	MA08	0.346154	intron_variant	FBgn0036801	MYPT-75D	ND
3L	18735458	T	T	G	SNP	MA24	0.222222	intergenic_region	-	-	ND
3L	18898356	T	T	A	SNP	MA05	0.638889	upstream_gene_variant	FBgn0027057	CSN1b	ND
3L	18911633	C	C	T	SNP	MA03	0.76087	missense_variant	FBgn0036831	CG6839	ND
3L	19010801	A	A	T	SNP	MA14	1	intron_variant	FBgn0002945	nkd	ND
3L	19011836	C	C	T	SNP	MA12	1	intron_variant	FBgn0002945	nkd	ND
3L	19016241	T	T	C	SNP	MA14	0.266667	intron_variant	FBgn0002945	nkd	ND
3L	19071159	C	C	G	SNP	MA01	1	intron_variant	FBgn0036844	Mkp3	ND
3L	19094108	C	C	A	SNP	MA10	0.235294	upstream_gene_variant	FBgn0036850	Gem2	ND
3L	19104002	G	G	A	SNP	MA25	0.980392	intron_variant	FBgn0036851	CG14082	ND
3L	19142943	G	G	A	SNP	MA25	0.97561	intron_variant	FBgn0016797	fz2	ND
3L	19244366	C	C	A	SNP	MA10	0.75	intergenic_region	-	-	ND
3L	19289596	C	C	T	SNP	MA15	0.344828	5_prime_UTR_premature_start_codon_gain_variant	FBgn0028380	fal	ND
3L	19520857	A	A	T	SNP	MA06	0.476923	downstream_gene_variant	FBgn0036880	Cpr76Bc	ND
3L	19611882	T-	T-	TT	INS	MA06	1	upstream_gene_variant	FBgn0260655	l_3_76BDm	ND
3L	19622719	G	G	A	SNP	MA20	0.285714	missense_variant	FBgn0036896	wnd	ND
3L	19667311	G	G	T	SNP	MA12	0.36	intergenic_region	-	-	ND
3L	19811921	C	C	A	SNP	MA20	0.451613	intron_variant	FBgn0013799	Deaf1	ND
3L	19831623	G	G	A	SNP	MA03	0.263158	missense_variant	FBgn0001324	kto	ND
3L	20203531	T	T	A	SNP	MA13	0.64	3_prime_UTR_variant	FBgn0036951	CG7017	ND
3L	20275417	C	C	A	SNP	MA22	0.5	intron_variant	FBgn0052227	gogo	ND
3L	20315645	T	T	C	SNP	MA04	0.807692	synonymous_variant	FBgn0036972	CG6434	ND
3L	20337166	G	G	T	SNP	MA03	0.689655	stop_gained	FBgn0036970	Spn77Bc	ND
3L	20346761	T	T	A	SNP	MA12	0.509434	3_prime_UTR_variant	FBgn0036974	eRF1	ND
3L	20414805	T	T	A	SNP	MA12	1	synonymous_variant	FBgn0036985	zye	ND
3L	20556038	G	G	C	SNP	MA13	0.316667	intergenic_region	-	-	ND
3L	20563157	T	T	C	SNP	MA11	0.387097	intergenic_region	-	-	ND
3L	20699923	G	G	C	SNP	MA03	0.25	intergenic_region	-	-	ND
3L	21094093	A	A	C	SNP	MA24	0.315789	intron_variant	FBgn0020294	ko	ND
3L	21218851	G	G	C	SNP	MA02	0.419355	upstream_gene_variant	FBgn0004865	Eip78C	ND
3L	21232154	C	C	A	SNP	MA25	0.777778	intron_variant	FBgn0004865	Eip78C	ND
3L	21257120	CT--	CTCT	TTCT	SNP	MA11	0.333333	intron_variant	FBgn0004865	Eip78C	ND
3L	21274696	G	G	T	SNP	MA20	0.25	upstream_gene_variant	FBgn0027945	ppl	ND
3L	21342475	C	C	T	SNP	MA16	0.727273	intron_variant	FBgn0052436	CG32436	ND
3L	21395297	G	G	C	SNP	MA18	0.576923	intron_variant	FBgn0261258	rgn	ND
3L	21417531	C	C	G	SNP	MA11	0.349206	intron_variant	FBgn0037081	barc	ND
3L	21439072	G	G	A	SNP	MA09	0.833333	5_prime_UTR_variant	FBgn0086377	Syx7	ND
3L	21470022	CTCTCTCTCTCACTT	CTCTCTCTCTCACTC	C--------------	DEL	MA24	0.777778	upstream_gene_variant	FBgn0014143	croc	ND
3L	21473971	T	T	A	SNP	MA10	0.290323	intergenic_region	-	-	ND
3L	21498123	TT	TT	T-	DEL	MA25	0.282051	frameshift_variant	FBgn0264561	Glg1	ND
3L	21562136	C	C	A	SNP	MA11	0.605263	upstream_gene_variant	FBgn0037102	CG7172	ND
3L	21585821	G	G	T	SNP	MA04	0.97561	intron_variant	FBgn0261953	TfAP-2	ND
3L	21601279	G	G	C	SNP	MA24	0.842105	5_prime_UTR_variant	FBgn0261953	TfAP-2	ND
3L	21648166	T------	T------	TTCATCT	INS	MA20	1	intron_variant	FBgn0264711	CG43980	ND
3L	21670425	C	C	A	SNP	MA11	0.4375	missense_variant	FBgn0037116	CG7158	ND
3L	21976460	T	T	C	SNP	MA18	0.972973	3_prime_UTR_variant	FBgn0037146	CG7470	ND
3L	21998203	GG	GG	TT	MNP	MA15	0.477273	intergenic_region	-	-	ND
3L	22018904	G	G	T	SNP	MA20	1	downstream_gene_variant	FBgn0037147	CG7140	ND
3L	22136547	T	T	C	SNP	MA22	0.485714	intron_variant	FBgn0037153	olf413	ND
3L	22177711	A	A	T	SNP	MA22	0.689655	intron_variant	FBgn0037153	olf413	ND
3L	22276636	ACAAAAGA	ACAAAAGA	A-------	DEL	MA22	0.315789	3_prime_UTR_variant	FBgn0025702	srpk79D	ND
3L	22488014	ACTGACTGA	ACTGACTGA	A--------	DEL	MA12	0.6	intergenic_region	-	-	ND
3L	22548233	G	G	A	SNP	MA24	0.222222	intergenic_region	-	-	ND
3L	22559370	G	G	T	SNP	MA20	1	intergenic_region	-	-	ND
3L	22565479	GCT	GCA	CCA	SNP	MA16	0.588235	intergenic_region	-	-	ND
3L	22766177	A-C--TAG------	A-C--TAG------	ATCATTAATCATCC	COMPLEX	MA11	0.307692	intron_variant	FBgn0052451	SPoCk	ND
3L	22791811	C	C	T	SNP	MA25	0.3125	intron_variant	FBgn0027339	jim	ND
3L	22916173	C	C	G	SNP	MA06	0.462963	intron_variant	FBgn0037206	CG12768	ND
3L	22923119	C	C	T	SNP	MA02	0.692308	intergenic_region	-	-	ND
3L	22979684	T	T	A	SNP	MA02	0.342857	intergenic_region	-	-	ND
3L	23199637	A	A	T	SNP	MA05	1	upstream_gene_variant	FBgn0266347	nAChRalpha4	ND
3L	23455103	G	G	C	SNP	MA10	0.217391	intergenic_region	-	-	ND
3L	23551385	AA	AA	A-	DEL	MA22	0.466667	intron_variant	FBgn0250816	AGO3	ND
3L	23640574	A	A	G	SNP	MA07	1	intron_variant	FBgn0250816	AGO3	ND
3L	23866098	T	T	A	SNP	MA02	0.264706	intron_variant	FBgn0058470	CG40470	ND
3L	23901869	C	C	T	SNP	MA15	0.242424	intron_variant	FBgn0058470	CG40470	ND
3L	24116305	T	T	G	SNP	MA14	0.54902	intron_variant	FBgn0011288	Snap25	ND
3L	24120207	A	A	T	SNP	MA08	0.212766	intron_variant	FBgn0011288	Snap25	ND
3L	24160882	G	G	C	SNP	MA13	0.319149	missense_variant	FBgn0011288	Snap25	No	AACTGCCAAGCCACACTTCT	GCCACGTGTTGCCTACAATA
3L	24244140	G	G	T	SNP	MA02	0.263158	intron_variant	FBgn0011288	Snap25	ND
3L	24327123	G	G	T	SNP	MA05	0.4	intron_variant	FBgn0259697	nvd	ND
3L	24360507	C	C	G	SNP	MA12	0.416667	intron_variant	FBgn0259697	nvd	ND
3R	56421	G	G	A	SNP	MA17	0.787234	downstream_gene_variant	FBgn0037220	CG14641	Yes	ATTTTGCGCTATGCGATGAT	CACTTCCACAGCCCTTTCTT
3R	148309	G	G	T	SNP	MA11	0.431818	intron_variant	FBgn0037234	CG9795	ND
3R	153645	G	G	T	SNP	MA01	1	3_prime_UTR_variant	FBgn0027866	CG9776	ND
3R	321974	A	A	G	SNP	MA03	0.862069	intron_variant	FBgn0085386	CG34357	ND
3R	358414	T	T	A	SNP	MA04	0.773585	intron_variant	FBgn0085386	CG34357	ND
3R	430470	C	C	A	SNP	MA25	0.927273	intergenic_region	-	-	ND
3R	487818	C	C	G	SNP	MA13	0.265625	intron_variant	FBgn0263346	CG43427	ND
3R	626932	C	C	T	SNP	MA16	0.703125	splice_region_variant	FBgn0260794	ctrip	ND
3R	912082	A	A	T	SNP	MA17	0.231884	5_prime_UTR_variant	FBgn0010313	corto	ND
3R	963953	T	T	A	SNP	MA19	0.375	5_prime_UTR_variant	FBgn0040684	CG12589	ND
3R	1051278	A	A	G	SNP	MA14	0.25	upstream_gene_variant	FBgn0037299	Vps37B	ND
3R	1257619	G	G	T	SNP	MA19	0.521739	intron_variant	FBgn0037326	CG14669	ND
3R	1357626	G	G	A	SNP	MA02	0.861111	synonymous_variant	FBgn0010051	Itp-r83A	ND
3R	1393105	GAG	GAG	G--	DEL	MA20	0.25	3_prime_UTR_variant	FBgn0037341	CG12746	ND
3R	1425032	A	A	C	SNP	MA14	1	missense_variant	FBgn0250753	kra	ND
3R	1569623	T	T	C	SNP	MA13	0.53125	missense_variant	FBgn0027497	Madm	Yes	GCCTACAGGAGCTGAAGTCG	CGAAAAGCAATGGGTGAAAG
3R	1590033	C	C	T	SNP	MA19	0.666667	intron_variant	FBgn0027608	CG2082	ND
3R	1623733	A	A	T	SNP	MA03	0.758621	missense_variant	FBgn0037379	CG10979	ND
3R	1661145	T-	T-	TG	INS	MA22	0.363636	intron_variant	FBgn0037386	CG1208	ND
3R	1675316	G	G	T	SNP	MA24	0.285714	non_coding_exon_variant	FBgn0037389	CR10991	No	CCAATGTGCAGATCCATGAG	CAAACGTTTCAACGCTGTTT
3R	1680794	G	G	A	SNP	MA15	0.403846	missense_variant	FBgn0029088	disp	ND
3R	1870515	AG	AG	A-	DEL	MA24	0.238095	intergenic_region	-	-	ND
3R	1955261	C	C	T	SNP	MA15	0.538462	intergenic_region	-	-	ND
3R	1968165	T	T	A	SNP	MA02	0.688889	intergenic_region	-	-	ND
3R	2059983	G	G	A	SNP	MA19	0.8	upstream_gene_variant	FBgn0027527	Osi6	ND
3R	2062815	C	C	T	SNP	MA02	0.75	3_prime_UTR_variant	FBgn0027527	Osi6	ND
3R	2133027	G	G	C	SNP	MA03	0.771429	synonymous_variant	FBgn0051556	CG31556	ND
3R	2298238	G	G	A	SNP	MA19	0.208333	intergenic_region	-	-	ND
3R	2313030	C	C	T	SNP	MA20	1	missense_variant	FBgn0037448	CG15186	ND
3R	2392707	G	G	A	SNP	MA20	0.227273	intron_variant	FBgn0053202	dpr11	ND
3R	2427510	G	G	T	SNP	MA17	0.846154	missense_variant	FBgn0051482	CG31482	ND
3R	2458856	C	C	T	SNP	MA22	0.433333	intergenic_region	-	-	ND
3R	2610395	A	A	C	SNP	MA07	0.3	intergenic_region	-	-	ND
3R	2672622	CC	CC	C-	DEL	MA05	0.352941	intron_variant	FBgn0003339	Scr	ND
3R	2953012	G	G	A	SNP	MA13	0.302326	synonymous_variant	FBgn0037473	CG10068	ND
3R	2974072	T	T	A	SNP	MA19	0.210526	missense_variant	FBgn0250732	gfzf	ND
3R	3016411	G	G	A	SNP	MA12	0.28	intron_variant	FBgn0086372	lap	ND
3R	3036531	C	C	T	SNP	MA24	0.6	intergenic_region	-	-	ND
3R	3079009	T	T	C	SNP	MA10	1	missense_variant	FBgn0001112	Gld	ND
3R	3127055	G	G	A	SNP	MA11	0.557692	intron_variant	FBgn0267337	rn	ND
3R	3143433	AA	AA	A-	DEL	MA19	0.5	upstream_gene_variant	FBgn0037498	CG10029	ND
3R	3185608	G	G	A	SNP	MA09	1	intergenic_region	-	-	ND
3R	3223585	C	C	A	SNP	MA14	0.97561	intergenic_region	-	-	ND
3R	3360303	A	A	C	SNP	MA19	0.555556	missense_variant	FBgn0261393	alpha-Est5	ND
3R	3394896	C	C	A	SNP	MA19	0.619048	intergenic_region	-	-	ND
3R	3481011	T	T	C	SNP	MA06	0.982143	intergenic_region	-	-	ND
3R	3600770	C	G	C	SNP	MA16	0.787879	intergenic_region	-	-	ND
3R	3633897	G	G	C	SNP	MA09	1	missense_variant	FBgn0037521	CG2993	ND
3R	3645724	A	A	T	SNP	MA11	0.407407	intron_variant	FBgn0085413	CG34384	ND
3R	3723562	C	C	T	SNP	MA03	0.666667	splice_region_variant	FBgn0260005	wtrw	ND
3R	3822642	A	A	G	SNP	MA19	0.56	intergenic_region	-	-	ND
3R	3920129	TATT	TATT	T---	DEL	MA12	0.325	intron_variant	FBgn0037548	CG7900	ND
3R	4178077	A	A	G	SNP	MA13	0.648352	3_prime_UTR_variant	FBgn0261108	Atg13	ND
3R	4181257	G	G	A	SNP	MA02	0.3	intergenic_region	-	-	No	CAGTTGTCCATCTGGTTTGC	CGGCGCTCTTTGTTTATCA
3R	4328217	C	C	T	SNP	MA18	0.34375	intergenic_region	-	-	ND
3R	4412225	GT	GT	G-	DEL	MA19	0.55	intron_variant	FBgn0261929	5-HT2B	ND
3R	4440324	T	T	A	SNP	MA12	0.432432	intron_variant	FBgn0261929	5-HT2B	ND
3R	4476801	C	C	T	SNP	MA17	0.289474	upstream_gene_variant	FBgn0024326	Mkk4	ND
3R	4540581	GGTTCCAAG	GGTTCCAAG	G--------	DEL	MA24	0.777778	frameshift_variant	FBgn0037612	CG8112	ND
3R	4633284	AA	AA	A-	DEL	MA18	0.5	3_prime_UTR_variant	FBgn0037634	hng2	ND
3R	4705541	A	A	G	SNP	MA22	0.512821	intron_variant	FBgn0262614	pyd	ND
3R	4723105	TT	TT	T-	DEL	MA09	0.6	intron_variant	FBgn0262614	pyd	ND
3R	4777268	TATATATATATA	TATATATATA--	CATATATATATA	COMPLEX	MA02	0.217391	3_prime_UTR_variant	FBgn0037645	CG11966	ND
3R	4846166	C	C	G	SNP	MA11	0.377358	3_prime_UTR_variant	FBgn0002932	neur	ND
3R	4857488	A	A	G	SNP	MA19	0.714286	intron_variant	FBgn0002932	neur	ND
3R	4858485	C	C	T	SNP	MA06	0.563218	intron_variant	FBgn0002932	neur	ND
3R	5008490	G	G	T	SNP	MA22	0.525424	intron_variant	FBgn0003165	pum	ND
3R	5054008	G	G	A	SNP	MA05	0.677419	intron_variant	FBgn0003165	pum	ND
3R	5096349	A	A	G	SNP	MA05	1	downstream_gene_variant	FBgn0261241	Vps16A	ND
3R	5451523	G	G	C	SNP	MA06	1	missense_variant	FBgn0037721	CG9427	ND
3R	5644411	T	T	A	SNP	MA25	0.268293	upstream_gene_variant	FBgn0037764	CG9459	ND
3R	6034445	C	C	T	SNP	MA12	0.358974	intron_variant	FBgn0004575	Syn	ND
3R	6179209	G	G	A	SNP	MA07	0.442308	intron_variant	FBgn0015396	jumu	ND
3R	6377389	T	T	C	SNP	MA01	0.263158	intron_variant	FBgn0001235	hth	ND
3R	6418862	TT	T-	TC	INS	MA11	0.208333	intron_variant	FBgn0001235	hth	ND
3R	6600892	G	G	A	SNP	MA03	0.84	intron_variant	FBgn0266446	CG45076	ND
3R	6647869	C	C	T	SNP	MA19	0.65625	intergenic_region	-	-	ND
3R	6705201	AAACA	AAACC	CAACC	SNP	MA22	0.740741	upstream_gene_variant	FBgn0037850	CG14695	ND
3R	6769722	CCTTTT	C-----	CTTTTT	INS	MA05	0.35	intergenic_region	-	-	ND
3R	6879139	GGGTGGCTAGAG	GGGTGGCTAGAG	G-----------	DEL	MA18	0.352941	intergenic_region	-	-	ND
3R	6899373	T	T	G	SNP	MA09	1	intergenic_region	-	-	ND
3R	7072238	G	G	A	SNP	MA20	0.242424	missense_variant	FBgn0037891	CG5214	ND
3R	7087459	G	G	T	SNP	MA06	1	intergenic_region	-	-	ND
3R	7291180	G	G	A	SNP	MA05	0.548387	missense_variant	FBgn0046225	CG17230	ND
3R	7300352	C	C	A	SNP	MA15	0.317073	intergenic_region	-	-	ND
3R	7578853	G	G	A	SNP	MA07	0.465517	synonymous_variant	FBgn0017581	Lk6	ND
3R	7643707	G	G	A	SNP	MA12	0.5	intron_variant	FBgn0259139	glo	ND
3R	7699095	T	T	C	SNP	MA14	1	intergenic_region	-	-	ND
3R	7728381	C	C	A	SNP	MA03	0.825	intron_variant	FBgn0037963	Cad87A	ND
3R	7798447	A	A	G	SNP	MA07	0.736842	missense_variant	FBgn0037970	GC2	ND
3R	7811261	T	T	G	SNP	MA15	0.212766	intron_variant	FBgn0260745	mfas	ND
3R	8014488	A	A	T	SNP	MA19	0.71875	intergenic_region	-	-	ND
3R	8177715	G	G	A	SNP	MA24	1	missense_variant	FBgn0038014	CG10041	ND
3R	8183827	A	A	G	SNP	MA19	0.65	intergenic_region	-	-	ND
3R	8349638	C	C	T	SNP	MA07	1	intron_variant	FBgn0250910	Octbeta3R	ND
3R	8356230	T	T	A	SNP	MA06	1	intron_variant	FBgn0250910	Octbeta3R	ND
3R	8458689	C	C	G	SNP	MA11	0.25	missense_variant	FBgn0260444	Not10	ND
3R	8560196	T-	T-	TT	INS	MA19	0.448276	intergenic_region	-	-	ND
3R	8569041	C	C	T	SNP	MA19	0.772727	missense_variant	FBgn0038083	CG5999	ND
3R	8648093	G	G	A	SNP	MA08	0.478261	intergenic_region	-	-	ND
3R	8765612	G	G	C	SNP	MA11	0.228571	intergenic_region	-	-	ND
3R	8813171	G	G	T	SNP	MA25	0.225806	missense_variant	FBgn0051342	CG31342	ND
3R	8837400	A	A	G	SNP	MA12	0.25	5_prime_UTR_variant	FBgn0020496	CtBP	ND
3R	8940495	G	G	C	SNP	MA13	0.347826	intron_variant	FBgn0038118	timeout	Yes	CATCGTAGTCCTGGGCAGTT	ACGAAATAAACCCGGATGTG
3R	9018756	TTA	TTG	T-G	DEL	MA11	0.947368	downstream_gene_variant	FBgn0038125	CG8141	ND
3R	9054782	C	C	T	SNP	MA13	0.409836	3_prime_UTR_variant	FBgn0000024	Ace	ND
3R	9096462	AAC	AAT	A-T	DEL	MA17	1	intron_variant	FBgn0038129	CG8449	ND
3R	9099602	G	G	A	SNP	MA12	0.966667	intergenic_region	-	-	ND
3R	9130009	C	C	T	SNP	MA05	0.388889	synonymous_variant	FBgn0052473	CG32473	ND
3R	9138675	TC	TC	GA	MNP	MA08	0.3125	missense_variant	FBgn0264991	CG44142	ND
3R	9201770	AGGTACTATA	AGGTACTATA	A---------	DEL	MA14	0.738095	intron_variant	FBgn0038143	CG9813	ND
3R	9225236	G	G	C	SNP	MA12	0.775	missense_variant	FBgn0038149	CG9796	ND
3R	9241244	G	G	C	SNP	MA17	0.716981	upstream_gene_variant	FBgn0041711	yellow-e	ND
3R	9316762	C	C	T	SNP	MA13	0.661972	intergenic_region	-	-	ND
3R	9478892	C	C	G	SNP	MA24	0.235294	3_prime_UTR_variant	FBgn0015778	rin	ND
3R	9728918	C	C	A	SNP	MA01	1	missense_variant	FBgn0000576	ems	ND
3R	9739222	A	A	T	SNP	MA09	1	intergenic_region	-	-	ND
3R	9742657	C	C	A	SNP	MA19	0.652174	intergenic_region	-	-	ND
3R	9951934	A	A	T	SNP	MA22	0.290323	missense_variant	FBgn0262955	RpII140	ND
3R	9980865	T	T	G	SNP	MA25	0.585366	missense_variant	FBgn0051533	CG31533	ND
3R	10057150	T	T	C	SNP	MA19	0.733333	intergenic_region	-	-	ND
3R	10080473	T	T	A	SNP	MA13	0.329268	intron_variant	FBgn0027083	Aats-met	ND
3R	10131890	A	A	T	SNP	MA01	1	missense_variant	FBgn0003567	su_Hw_	ND
3R	10375108	C	C	T	SNP	MA22	1	intron_variant	FBgn0038237	Pde6	ND
3R	10468466	C	C	G	SNP	MA13	0.288889	3_prime_UTR_variant	FBgn0086686	l_3_L1231	ND
3R	10569042	AGCGGC	AGCGGC	A-CGGG	COMPLEX	MA01	0.545455	intron_variant	FBgn0263929	jvl	ND
3R	10582273	C	C	G	SNP	MA13	0.245902	intron_variant	FBgn0263929	jvl	ND
3R	10602991	T---	T---	TATT	INS	MA03	0.772727	intron_variant	FBgn0263929	jvl	ND
3R	10749311	G	G	A	SNP	MA11	0.548387	non_coding_exon_variant	FBgn0267158	CR45598	ND
3R	10812621	TACCAGC	TACCAGC	T----GT	COMPLEX	MA25	1	intergenic_region	-	-	ND
3R	11195917	TGGTT	TGGTT	T----	DEL	MA13	0.311688	3_prime_UTR_variant	FBgn0038332	CG6136	ND
3R	11236701	C	C	A	SNP	MA19	0.214286	intron_variant	FBgn0041188	Atx2	ND
3R	11354706	G	G	A	SNP	MA11	0.5	intergenic_region	-	-	ND
3R	11722694	C	C	T	SNP	MA18	0.939394	3_prime_UTR_variant	FBgn0027657	glob1	ND
3R	11865631	C	C	T	SNP	MA01	0.25	missense_variant	FBgn0003117	pnr	ND
3R	11891444	G	G	A	SNP	MA01	0.285714	missense_variant	FBgn0038397	CG10185	ND
3R	11975931	AAA	AA-	A--	DEL	MA19	0.352941	intron_variant	FBgn0038402	Fer2	ND
3R	12040184	GTATAC	GTATAC	G-----	DEL	MA16	0.762712	non_coding_exon_variant	FBgn0267201	CR45641	ND
3R	12132610	C	C	T	SNP	MA19	0.411765	missense_variant	FBgn0038412	Zip89B	ND
3R	12175538	C	C	T	SNP	MA20	1	intron_variant	FBgn0027095	Manf	ND
3R	12357437	G	G	C	SNP	MA18	0.904762	intron_variant	FBgn0259244	CG42342	ND
3R	12361452	T	T	A	SNP	MA19	0.352941	intron_variant	FBgn0259244	CG42342	ND
3R	12671500	G	G	T	SNP	MA13	0.481481	intron_variant	FBgn0264857	iab-8	Yes	CCGACCAATCGAGCAGATTA	AGCGAGGAAACCAAAGTCAA
3R	12710388	C	C	T	SNP	MA24	1	intron_variant	FBgn0264857	iab-8	ND
3R	12761832	A	A	T	SNP	MA20	1	splice_region_variant	FBgn0000015	Abd-B	ND
3R	12834923	C	C	T	SNP	MA19	0.333333	intron_variant	FBgn0038466	CG8907	ND
3R	12872119	A	A	G	SNP	MA19	0.294118	missense_variant	FBgn0266053	Patr-1	ND
3R	12939981	C	C	G	SNP	MA18	0.708333	intron_variant	FBgn0014141	cher	ND
3R	12944212	AA	AA	A-	DEL	MA07	0.828571	intron_variant	FBgn0014141	cher	ND
3R	13092215	C	C	G	SNP	MA08	0.630435	downstream_gene_variant	FBgn0265197	CG44257	ND
3R	13168211	G	G	A	SNP	MA04	1	intron_variant	FBgn0038498	beat-IIa	ND
3R	13415557	C	C	A	SNP	MA25	0.8	intergenic_region	-	-	ND
3R	13430527	GGT	GGC	G-C	DEL	MA13	0.939394	intergenic_region	-	-	ND
3R	13453780	C	C	G	SNP	MA11	0.234043	intron_variant	FBgn0038531	CG14325	ND
3R	13529940	A	A	T	SNP	MA05	0.290323	intron_variant	FBgn0261885	osa	ND
3R	13608219	C	C	T	SNP	MA19	0.517241	missense_variant	FBgn0262562	CG43102	ND
3R	13883575	C	C	A	SNP	MA02	0.268293	intergenic_region	-	-	ND
3R	13943245	G	G	T	SNP	MA17	0.380952	intron_variant	FBgn0003499	sr	ND
3R	14113151	G	G	A	SNP	MA19	0.8	missense_variant	FBgn0038598	CG7131	ND
3R	14134252	TTTTA	TTGTG	T-GTG	DEL	MA09	0.428571	intron_variant	FBgn0038603	PKD	ND
3R	14175514	C	C	G	SNP	MA07	0.979167	intron_variant	FBgn0038606	CG15803	ND
3R	14356136	C	C	T	SNP	MA12	0.222222	intron_variant	FBgn0004652	fru	ND
3R	14372815	G	G	T	SNP	MA05	0.26087	intergenic_region	-	-	ND
3R	14384724	T	T	A	SNP	MA01	0.76	upstream_gene_variant	FBgn0038626	CG7691	ND
3R	14500235	C	C	T	SNP	MA17	0.352113	3_prime_UTR_variant	FBgn0038638	CG7702	ND
3R	14578278	T	T	A	SNP	MA20	1	missense_variant	FBgn0038651	CG14299	ND
3R	14755445	C	C	G	SNP	MA07	1	intron_variant	FBgn0261262	CG42613	ND
3R	14956690	G	G	A	SNP	MA04	1	synonymous_variant	FBgn0038679	CG6040	ND
3R	15126777	G	G	A	SNP	MA22	1	intergenic_region	-	-	ND
3R	15229691	G	G	A	SNP	MA04	1	missense_variant	FBgn0038704	CG5316	ND
3R	15320665	A	A	T	SNP	MA04	1	intron_variant	FBgn0260003	Dys	ND
3R	15327402	G	G	A	SNP	MA02	0.268293	intron_variant	FBgn0260003	Dys	No	ACTTTTAGGCGGAGCAGTCA	GCAGATTGCTGATTTGTCCA
3R	15345659	T	T	A	SNP	MA08	1	intron_variant	FBgn0260003	Dys	ND
3R	15371156	G	G	C	SNP	MA01	0.7	intron_variant	FBgn0260003	Dys	ND
3R	15467302	T	T	C	SNP	MA25	1	intron_variant	FBgn0038721	subdued	ND
3R	15643728	G	G	T	SNP	MA13	0.728571	intron_variant	FBgn0014135	bnl	ND
3R	15685984	AA	AA	A-	DEL	MA16	0.694444	intron_variant	FBgn0261984	Ire1	ND
3R	15749344	GAAAT	GAAAC	AAAAC	SNP	MA25	1	coding_variant	FBgn0038752	CG4462	ND
3R	15767023	C	C	A	SNP	MA07	1	intron_variant	FBgn0038755	Hs6st	ND
3R	15796085	G	G	A	SNP	MA15	1	intron_variant	FBgn0038755	Hs6st	ND
3R	15866170	C	C	T	SNP	MA12	0.217391	intron_variant	FBgn0040571	CG17193	ND
3R	15868616	T	T	A	SNP	MA17	0.934783	intron_variant	FBgn0040571	CG17193	Yes	GCCAAATCGGAGACCTGATA	GCAGGGCCATGGTAACAATA
3R	15929487	C	T	C	SNP	MA04	0.428571	intergenic_region	-	-	ND
3R	16151682	T	T	C	SNP	MA04	1	missense_variant	FBgn0038787	CG4360	ND
3R	16251203	G	G	A	SNP	MA04	1	intron_variant	FBgn0262869	Gfrl	ND
3R	16596107	ACTTAA	ACTTAA	A-----	DEL	MA22	0.382353	intron_variant	FBgn0038826	Syp	ND
3R	16686666	T	T	A	SNP	MA17	0.333333	3_prime_UTR_variant	FBgn0038837	CG3822	ND
3R	16839807	C	C	T	SNP	MA06	0.339286	3_prime_UTR_variant	FBgn0013995	Calx	ND
3R	16891570	GT	GG	CG	SNP	MA08	0.243243	intron_variant	FBgn0000083	AnxB9	ND
3R	17016835	C	C	G	SNP	MA11	0.878788	intron_variant	FBgn0264357	SNF4Agamma	ND
3R	17020210	C	C	T	SNP	MA13	0.8125	intron_variant	FBgn0264357	SNF4Agamma	No	CAACGAGTTGACAGGAGTGC	TGCGTATCGCTAGGCAATTA
3R	17098430	G	G	A	SNP	MA19	0.916667	synonymous_variant	FBgn0038877	CG3308	ND
3R	17118642	G	G	T	SNP	MA17	1	intron_variant	FBgn0038880	SIFaR	Yes	AAAAGTTTGTTGCCGTTTCG	TGTGCGTGGTCAGTTTGAAT
3R	17146428	G	G	A	SNP	MA25	0.982759	3_prime_UTR_variant	FBgn0038881	CG16791	ND
3R	17372343	G	G	A	SNP	MA12	1	intergenic_region	-	-	ND
3R	17483698	CTGTA	CTGTG	ATGTG	SNP	MA04	1	intron_variant	FBgn0011766	E2f	ND
3R	17549769	A	A	G	SNP	MA11	0.833333	downstream_gene_variant	FBgn0264905	CR44096	ND
3R	17583753	TT	TT	T-	DEL	MA22	0.483871	upstream_gene_variant	FBgn0259237	CG42335	ND
3R	17599684	C	C	G	SNP	MA12	0.974359	missense_variant	FBgn0027575	GABA-B-R2	ND
3R	17707659	A	A	T	SNP	MA02	1	missense_variant	FBgn0051465	CG31465	ND
3R	17788564	C	C	A	SNP	MA13	0.97619	intron_variant	FBgn0264490	Eip93F	Yes	AAATTGCAGACGATGAGTGC	AGACAAATTTCCGCCCATAA
3R	18023798	C	C	A	SNP	MA19	1	intron_variant	FBgn0051163	SKIP	ND
3R	18158030	GC	GC	CT	MNP	MA11	0.617647	missense_variant	FBgn0038942	CG13862	ND
3R	18245185	C	C	T	SNP	MA12	0.25641	missense_variant	FBgn0038964	Nop56	ND
3R	18327404	T	T	A	SNP	MA14	0.964286	intron_variant	FBgn0038980	Octbeta1R	ND
3R	18333715	C	C	G	SNP	MA22	0.47619	intron_variant	FBgn0038980	Octbeta1R	ND
3R	18369675	A	A	T	SNP	MA16	1	3_prime_UTR_variant	FBgn0038984	AdipoR	ND
3R	18394133	TA	TA	T-	DEL	MA18	1	intergenic_region	-	-	ND
3R	18397086	G	G	C	SNP	MA12	0.311111	intron_variant	FBgn0053110	CG33110	ND
3R	18461971	C	C	T	SNP	MA15	1	5_prime_UTR_variant	FBgn0020278	loco	ND
3R	18480526	C	C	G	SNP	MA04	0.5	intron_variant	FBgn0266418	CG45058	ND
3R	18486626	G	G	A	SNP	MA24	0.222222	intron_variant	FBgn0266418	CG45058	ND
3R	18717306	A	A	T	SNP	MA16	0.541667	intergenic_region	-	-	ND
3R	18783693	G	G	A	SNP	MA15	0.97619	intron_variant	FBgn0017590	klg	ND
3R	18835121	G	G	C	SNP	MA08	0.470588	intron_variant	FBgn0085404	CG34375	ND
3R	18835226	C	C	T	SNP	MA24	0.730769	intron_variant	FBgn0085404	CG34375	Yes	TAGCTTCCTCCTTGGCTGTC	TTGCGGTTTCTTTCGTGTAA
3R	18878630	T	T	G	SNP	MA19	0.521739	intron_variant	FBgn0039044	p53	ND
3R	19071963	T	T	C	SNP	MA09	0.627907	intron_variant	FBgn0039064	CG4467	ND
3R	19181183	C	C	G	SNP	MA13	0.447368	missense_variant	FBgn0016119	ATPsyn-Cf6	ND
3R	19182227	A	A	C	SNP	MA12	0.769231	5_prime_UTR_premature_start_codon_gain_variant	FBgn0024509	Sec13	ND
3R	19393851	G	G	A	SNP	MA07	1	intron_variant	FBgn0039089	beat-IV	ND
3R	19428393	C	C	T	SNP	MA20	0.236842	synonymous_variant	FBgn0039094	CG10184	ND
3R	19509266	G	G	T	SNP	MA15	1	missense_variant	FBgn0039101	CG16710	ND
3R	19692010	AAATGGTGGA	AAATGGTGGA	A---------	DEL	MA20	0.826087	intron_variant	FBgn0025574	Pli	ND
3R	19792657	T	T	G	SNP	MA11	0.891892	intron_variant	FBgn0051140	CG31140	ND
3R	19869362	GG	GG	G-	DEL	MA18	1	3_prime_UTR_variant	FBgn0005649	Rox8	ND
3R	19999688	G	G	A	SNP	MA13	0.642857	intron_variant	FBgn0039161	CG13606	ND
3R	20094132	GG	GG	G-	DEL	MA04	0.347826	intron_variant	FBgn0011225	jar	ND
3R	20243529	G	G	C	SNP	MA20	0.208333	intron_variant	FBgn0000036	nAChRalpha1	ND
3R	20267552	C	C	T	SNP	MA13	0.984127	intron_variant	FBgn0000036	nAChRalpha1	ND
3R	20348919	G	G	A	SNP	MA13	1	missense_variant	FBgn0039202	CG13622	ND
3R	20378435	T	T	G	SNP	MA19	0.285714	intron_variant	FBgn0266758	Esyt2	ND
3R	20395168	TCATCATACAATAGCAAT	TCATCATACAATAGCAAT	T-----------------	DEL	MA15	0.205128	intron_variant	FBgn0039209	CG13624	ND
3R	20396689	C	C	T	SNP	MA12	0.651163	intron_variant	FBgn0039209	CG13624	ND
3R	20401261	AAC	AAT	A-T	DEL	MA24	1	intron_variant	FBgn0039209	CG13624	ND
3R	20438327	AA	AA	A-	DEL	MA02	0.289474	intron_variant	FBgn0263490	mld	ND
3R	20441933	G	G	A	SNP	MA15	0.314815	missense_variant	FBgn0263490	mld	ND
3R	20512788	A	A	T	SNP	MA08	0.4375	intron_variant	FBgn0003429	slo	ND
3R	20552521	G	G	A	SNP	MA01	0.829268	intron_variant	FBgn0004885	tok	ND
3R	20713305	T	T	A	SNP	MA13	0.215686	intron_variant	FBgn0051121	CG31121	No	AAGCCTCGCACTTGCATTAT	AGCTGCGGCTTTAGTTTCTG
3R	20726813	A	A	G	SNP	MA11	0.76	intron_variant	FBgn0040601	CG13643	Yes	CTAAACTGGGCCAAAACTCG	GCTGAAGACTGTGCTGATGC
3R	20773473	G	G	A	SNP	MA25	0.551724	synonymous_variant	FBgn0039255	CG13646	ND
3R	20858733	C	C	T	SNP	MA25	0.489796	missense_variant	FBgn0039260	Smg6	ND
3R	20925122	G	G	A	SNP	MA19	0.555556	3_prime_UTR_variant	FBgn0053096	CG33096	ND
3R	20939763	C	C	T	SNP	MA17	0.774194	missense_variant	FBgn0051108	CG31108	ND
3R	20997298	C	C	T	SNP	MA25	0.375	missense_variant	FBgn0083946	lobo	ND
3R	21043093	C	C	T	SNP	MA25	0.380952	intron_variant	FBgn0051106	CG31106	ND
3R	21208684	C	C	A	SNP	MA17	0.969697	intron_variant	FBgn0004509	Fur1	Yes	AATCACGACATTCGTGCAAA	GCATTCCCACTCGTTTTTGT
3R	21275587	AAT	AAG	A-G	DEL	MA13	1	intron_variant	FBgn0004509	Fur1	ND
3R	21383401	C	C	T	SNP	MA11	0.272727	intron_variant	FBgn0011666	msi	ND
3R	21395316	T	T	C	SNP	MA02	0.393939	intron_variant	FBgn0011666	msi	ND
3R	21516936	T	T	G	SNP	MA20	0.238095	intergenic_region	-	-	ND
3R	21611630	C	C	T	SNP	MA09	1	downstream_gene_variant	FBgn0039371	CG4960	ND
3R	21686904	A	A	T	SNP	MA09	1	intron_variant	FBgn0039380	CG5890	ND
3R	21842418	C	C	T	SNP	MA19	0.725	3_prime_UTR_variant	FBgn0002592	E_spl_m2-BFM	ND
3R	21923502	AA	AA	A-	DEL	MA19	0.25	intron_variant	FBgn0039411	dys	ND
3R	22102093	A	A	C	SNP	MA04	1	3_prime_UTR_variant	FBgn0039420	CG6154	ND
3R	22141928	T	T	C	SNP	MA03	0.888889	intergenic_region	-	-	ND
3R	22255005	T	T	C	SNP	MA02	0.964286	downstream_gene_variant	FBgn0051084	CR31084	ND
3R	22346366	C	C	A	SNP	MA05	1	non_coding_exon_variant	FBgn0266753	CR45226	ND
3R	22382580	G	G	T	SNP	MA05	0.27027	intron_variant	FBgn0263289	scrib	ND
3R	22399408	C	C	G	SNP	MA09	0.652174	missense_variant	FBgn0263289	scrib	ND
3R	22471662	T	T	A	SNP	MA04	0.615385	3_prime_UTR_variant	FBgn0250908	beat-VII	ND
3R	22503199	GGC---	GGC---	AACAGA	COMPLEX	MA04	0.5	intron_variant	FBgn0250908	beat-VII	ND
3R	22593122	T	T	C	SNP	MA02	0.24	intergenic_region	-	-	ND
3R	22647313	G	G	C	SNP	MA05	0.518519	intron_variant	FBgn0262473	Tl	ND
3R	22659552	C	C	T	SNP	MA14	0.395349	intron_variant	FBgn0262473	Tl	ND
3R	22793428	G	G	A	SNP	MA02	0.275	intron_variant	FBgn0039466	CG5521	ND
3R	22851663	G	G	A	SNP	MA18	1	synonymous_variant	FBgn0039476	CG6271	ND
3R	23263487	G	G	T	SNP	MA05	0.25	upstream_gene_variant	FBgn0016061	side	ND
3R	23276769	G	G	C	SNP	MA10	0.644444	intergenic_region	-	-	ND
3R	23283480	G	G	A	SNP	MA14	0.964286	intergenic_region	-	-	ND
3R	23290778	AAGGA	AACGT	A-CGT	DEL	MA11	0.972973	intron_variant	FBgn0039518	CG13978	ND
3R	23527742	G	G	C	SNP	MA25	0.35	missense_variant	FBgn0045862	btz	ND
3R	23539143	T	T	C	SNP	MA12	0.26087	intergenic_region	-	-	ND
3R	23868457	C	C	T	SNP	MA20	0.294118	intron_variant	FBgn0085391	CG34362	ND
3R	23926899	G	G	A	SNP	MA05	1	intergenic_region	-	-	ND
3R	23932508	G	G	A	SNP	MA19	0.684211	intergenic_region	-	-	ND
3R	24063211	T	T	A	SNP	MA22	0.425	non_coding_exon_variant	FBgn0266401	CR45041	ND
3R	24175013	TT	TT	T-	DEL	MA19	0.3125	intergenic_region	-	-	ND
3R	24189598	C	C	T	SNP	MA16	0.727273	intergenic_region	-	-	ND
3R	24275862	G	G	T	SNP	MA02	0.592593	intron_variant	FBgn0039584	beat-VI	ND
3R	24292558	GAATGCTGGATGCT	G-------GATGCT	GGATGCTGGATGCA	COMPLEX	MA24	0.387097	intron_variant	FBgn0039584	beat-VI	ND
3R	24345925	G	G	T	SNP	MA19	0.478261	missense_variant	FBgn0051051	CG31051	ND
3R	24367988	A	A	G	SNP	MA19	0.208333	downstream_gene_variant	FBgn0039588	CG12413	ND
3R	24413846	TTCTAAAAAAAAAAAAAAAAAAAA	TTCTAAAAAAAAAAAA--------	GTCTAAAAAAAAAAAA--------	SNP	MA25	0.933333	splice_region_variant	FBgn0262741	MRE23	ND
3R	24473484	T	T	C	SNP	MA19	0.407407	intergenic_region	-	-	ND
3R	24601005	ACAACGACAGCGACGGATGA	ACAACGACAGCGACGGATGC	A----------------TGC	DEL	MA24	0.882353	intergenic_region	-	-	ND
3R	24667643	T	T	C	SNP	MA19	0.28	intron_variant	FBgn0015589	Apc	ND
3R	24724326	ATTACTTGCG	ATTAATTGCA	CTTAATTGCA	SNP	MA17	1	intron_variant	FBgn0265998	Doa	ND
3R	24741823	C	C	A	SNP	MA13	0.909091	intron_variant	FBgn0265998	Doa	No	TGCTACCCCTATTGCCACAT	CATACGATTCAGGGGGATTG
3R	24759293	G	G	A	SNP	MA19	0.473684	intron_variant	FBgn0039617	CG14521	ND
3R	24816435	C	C	A	SNP	MA18	0.794872	intergenic_region	-	-	ND
3R	24884749	TTG	TTA	T-A	DEL	MA14	0.973684	3_prime_UTR_variant	FBgn0039631	Sirt7	ND
3R	24940261	G	G	A	SNP	MA19	0.380952	synonymous_variant	FBgn0039635	CG11876	ND
3R	24971673	G	G	A	SNP	MA20	0.266667	missense_variant	FBgn0039641	CG14511	ND
3R	25039425	G	G	T	SNP	MA06	1	upstream_gene_variant	FBgn0051044	CR31044	ND
3R	25073906	T	T	A	SNP	MA17	0.981481	missense_variant	FBgn0263236	SP1029	ND
3R	25081397	G	G	C	SNP	MA02	0.75	5_prime_UTR_variant	FBgn0003525	stg	ND
3R	25199841	G	G	A	SNP	MA20	0.25	intergenic_region	-	-	ND
3R	25199905	G	G	A	SNP	MA20	0.28125	intergenic_region	-	-	ND
3R	25429450	AT--------	GT--------	GTGTGTGTGT	INS	MA04	0.72	intron_variant	FBgn0086361	alph	ND
3R	25512654	C	C	A	SNP	MA19	0.9	intron_variant	FBgn0039682	Obp99c	ND
3R	25525761	GG	GG	G-	DEL	MA01	0.645833	intergenic_region	-	-	ND
3R	25553020	C	C	A	SNP	MA15	0.357143	intron_variant	FBgn0039688	Kul	ND
3R	25841983	G	G	A	SNP	MA25	0.220339	3_prime_UTR_variant	FBgn0039738	Mgat2	ND
3R	25887421	C	C	A	SNP	MA17	0.983607	intron_variant	FBgn0266411	sima	ND
3R	25902398	C	C	T	SNP	MA11	0.235294	intron_variant	FBgn0266411	sima	ND
3R	25944369	TCCTAA	TCCTAC	CCCTAC	SNP	MA19	0.96875	intron_variant	FBgn0266411	sima	ND
3R	26005909	G	G	T	SNP	MA13	0.204082	upstream_gene_variant	FBgn0260860	Bet5	ND
3R	26058716	T	T	A	SNP	MA03	1	intergenic_region	-	-	ND
3R	26130278	G	G	A	SNP	MA02	0.472222	intron_variant	FBgn0010113	hdc	ND
3R	26292248	G	G	C	SNP	MA14	0.428571	intron_variant	FBgn0039776	PH4alphaEFB	ND
3R	26325693	G	G	T	SNP	MA22	0.984375	intron_variant	FBgn0039780	PH4alphaNE1	ND
3R	26385679	A	A	G	SNP	MA22	0.583333	intron_variant	FBgn0082582	tmod	ND
3R	26479876	GG	GG	G-	DEL	MA19	0.894737	intergenic_region	-	-	ND
3R	26488184	T	T	C	SNP	MA24	0.375	intergenic_region	-	-	ND
3R	26519216	G	G	T	SNP	MA09	0.382353	downstream_gene_variant	FBgn0039795	Spn100A	ND
3R	26560117	A	A	T	SNP	MA09	0.342857	intergenic_region	-	-	ND
3R	26636552	A	A	G	SNP	MA19	0.894737	intron_variant	FBgn0027598	cindr	ND
3R	26723247	C	C	T	SNP	MA19	1	synonymous_variant	FBgn0015032	Cyp4c3	ND
3R	26724635	T	T	A	SNP	MA13	0.677419	intron_variant	FBgn0015032	Cyp4c3	ND
3R	26930154	C	C	T	SNP	MA16	1	intergenic_region	-	-	ND
3R	27005440	A	A	T	SNP	MA02	0.485714	3_prime_UTR_variant	FBgn0051004	mesh	ND
3R	27034288	C	C	G	SNP	MA09	0.8125	intron_variant	FBgn0000313	chp	ND
3R	27125292	T	T	C	SNP	MA19	0.928571	intergenic_region	-	-	ND
3R	27245151	G	G	A	SNP	MA24	0.6	intron_variant	FBgn0261988	Gprk2	ND
3R	27392509	C	C	T	SNP	MA10	0.611111	downstream_gene_variant	FBgn0039852	nyo	ND
3R	27422097	G	G	C	SNP	MA19	0.294118	upstream_gene_variant	FBgn0039857	RpL6	ND
3R	27436631	C	C	A	SNP	MA07	0.571429	5_prime_UTR_variant	FBgn0039858	CycG	ND
3R	27478820	C	C	G	SNP	MA15	0.983607	intron_variant	FBgn0039862	kek6	ND
3R	27626887	G	G	A	SNP	MA10	0.512821	missense_variant	FBgn0039879	Ir100a	ND
3R	27766569	A	A	G	SNP	MA19	1	intron_variant	FBgn0011224	heph	ND
3R	27814191	T	T	A	SNP	MA25	1	intron_variant	FBgn0039886	CG2003	ND
4	42857	A	A	T	SNP	MA12	0.764706	non_coding_exon_variant	FBgn0052010	CR32010	ND
4	148965	G	G	T	SNP	MA08	1	intron_variant	FBgn0011747	Ank	ND
4	210813	C	C	T	SNP	MA16	0.745763	intron_variant	FBgn0039890	CG2316	ND
4	354162	C	C	A	SNP	MA19	1	intron_variant	FBgn0259214	PMCA	ND
4	464942	ACGTGGAGTAAAAGATATATGTACTTTA	ACGTGGAGTAAAAGATATATGTACTTTA	A---------------------------	DEL	MA22	1	upstream_gene_variant	FBgn0039907	lgs	ND
4	486157	G	G	A	SNP	MA17	0.276596	intron_variant	FBgn0026262	bip2	ND
4	759078	A	A	G	SNP	MA01	1	intron_variant	FBgn0005666	bt	ND
4	777876	A	A	G	SNP	MA13	0.706897	intron_variant	FBgn0005666	bt	ND
4	956325	A	A	G	SNP	MA06	0.32	intergenic_region	-	-	ND
4	1062313	T	T	G	SNP	MA02	0.3	intron_variant	FBgn0264607	CaMKII	ND
4	1091041	C	C	G	SNP	MA04	0.9	missense_variant	FBgn0087002	Rfabg	ND
4	1212838	C	C	A	SNP	MA02	0.8	intron_variant	FBgn0250819	CG33521	ND
4	1228296	A	A	G	SNP	MA16	0.282609	downstream_gene_variant	FBgn0263112	Mitf	ND
4	1234855	A	A	C	SNP	MA04	0.884615	intron_variant	FBgn0053653	Caps	ND
4	1257585	C	C	G	SNP	MA05	0.322581	intron_variant	FBgn0053653	Caps	ND
4	1266762	T	T	C	SNP	MA04	0.866667	intron_variant	FBgn0053653	Caps	ND
4	1286891	T	T	A	SNP	MA05	0.205882	intergenic_region	-	-	ND
X	198169	C	C	A	SNP	MA20	1	intron_variant	FBgn0024989	CG3777	ND
X	198371	G	G	T	SNP	MA15	1	intron_variant	FBgn0024989	CG3777	ND
X	232168	G---C-CA---	G---C-CA---	CTTACACACTA	COMPLEX	MA03	1	intron_variant	FBgn0024989	CG3777	ND
X	259348	T	T	C	SNP	MA13	0.981818	intron_variant	FBgn0266568	yar	ND
X	475735	GTCA	GTCA	ATCG	COMPLEX	MA11	0.710526	upstream_gene_variant	FBgn0261930	vnd	ND
X	529575	G	G	T	SNP	MA05	0.958333	5_prime_UTR_variant	FBgn0020381	Dredd	ND
X	628329	TC	TC	CA	MNP	MA18	0.377778	intron_variant	FBgn0021764	sdk	ND
X	660028	C	C	A	SNP	MA10	0.285714	non_coding_exon_variant	FBgn0266281	CR44966	ND
X	785006	C	C	G	SNP	MA09	0.938776	intron_variant	FBgn0264449	CG43867	ND
X	1016719	C	C	G	SNP	MA22	0.966667	intron_variant	FBgn0040397	CG3655	ND
X	1144403	G	G	C	SNP	MA19	0.828571	intron_variant	FBgn0028550	Atf3	ND
X	1188621	G	G	A	SNP	MA07	0.931034	5_prime_UTR_variant	FBgn0025641	DAAM	ND
X	1235204	G	G	T	SNP	MA24	1	intron_variant	FBgn0024366	CG11409	ND
X	1272325	GG	GG	G-	DEL	MA12	0.958333	3_prime_UTR_variant	FBgn0023169	AMPKalpha	ND
X	1317822	G	G	A	SNP	MA06	0.981481	intron_variant	FBgn0259108	futsch	ND
X	1329894	A	A	T	SNP	MA09	0.981481	missense_variant	FBgn0259108	futsch	ND
X	1411771	A	A	G	SNP	MA13	0.477778	downstream_gene_variant	FBgn0025394	inc	ND
X	1482875	C---	C---	CACA	INS	MA13	0.983871	intron_variant	FBgn0025390	Mur2B	ND
X	1616819	C	C	G	SNP	MA22	0.40625	intergenic_region	-	-	ND
X	1647038	G	G	A	SNP	MA01	0.275	intron_variant	FBgn0025391	Scgdelta	ND
X	1819187	G	G	A	SNP	MA22	0.632653	missense_variant	FBgn0023508	Ocrl	ND
X	1885249	A	A	G	SNP	MA12	0.304348	intron_variant	FBgn0264562	Hr4	ND
X	1980104	G	G	A	SNP	MA22	0.528302	intron_variant	FBgn0040395	Unc-76	ND
X	2096389	C	C	T	SNP	MA11	0.607143	synonymous_variant	FBgn0023550	CG18031	ND
X	2119499	G	G	A	SNP	MA15	0.956522	5_prime_UTR_variant	FBgn0003048	pcx	ND
X	2252513	C	C	A	SNP	MA22	0.235294	intron_variant	FBgn0003159	ptr	ND
X	2279972	TT	AT	AA	SNP	MA01	0.478261	intron_variant	FBgn0264598	PsGEF	ND
X	2305143	T	T	C	SNP	MA14	1	upstream_gene_variant	FBgn0040385	CG12496	ND
X	2429686	C	C	G	SNP	MA17	0.862745	intron_variant	FBgn0261451	trol	ND
X	2483048	G	G	T	SNP	MA18	0.486486	5_prime_UTR_premature_start_codon_gain_variant	FBgn0001404	egh	ND
X	2558342	CTGATAGAGTATATTTTTTAATTGTC	CTGATAGAGTATATTTTTTAATTGTC	C-------------------------	DEL	MA17	0.814815	intron_variant	FBgn0003371	sgg	ND
X	2591069	G	G	A	SNP	MA24	1	synonymous_variant	FBgn0024992	CG2658	Yes	TTCCTTCACCTCCTGTTTCG	TGACGAAAAGATGCGTTCTG
X	2627482	G	G	C	SNP	MA11	0.304348	synonymous_variant	FBgn0024975	CG2712	ND
X	2764313	C	C	G	SNP	MA16	1	intron_variant	FBgn0028369	kirre	ND
X	2801895	G	G	T	SNP	MA04	1	intron_variant	FBgn0028369	kirre	ND
X	2847848	C	C	G	SNP	MA01	0.482759	stop_lost	FBgn0003285	rst	ND
X	2860257	G	G	A	SNP	MA08	1	intron_variant	FBgn0028369	kirre	ND
X	2879864	GA	GA	CT	MNP	MA25	1	intron_variant	FBgn0028369	kirre	ND
X	2933140	T	T	G	SNP	MA06	0.380282	intron_variant	FBgn0028369	kirre	ND
X	3002405	AA	AA	A-	DEL	MA18	0.65625	intron_variant	FBgn0028369	kirre	ND
X	3090892	T	T	G	SNP	MA18	0.451613	intron_variant	FBgn0000479	dnc	ND
X	3149870	A	A	T	SNP	MA17	1	intron_variant	FBgn0000479	dnc	ND
X	3305292	CAT--------ACATAA	CAT--------ACATAA	TATGTATATATACATAT	COMPLEX	MA18	0.363636	intron_variant	FBgn0266350	CR44999	ND
X	3366789	T---------	T---------	TGTTGCTGCT	INS	MA18	0.711538	inframe_insertion	FBgn0029662	CG12206	ND
X	3428484	C	C	A	SNP	MA07	0.973684	intron_variant	FBgn0052791	CG32791	ND
X	3724509	G	G	A	SNP	MA12	1	intron_variant	FBgn0029679	CG2901	ND
X	3733931	A	A	C	SNP	MA19	1	intron_variant	FBgn0000542	ec	ND
X	3762237	C	C	G	SNP	MA06	0.25	5_prime_UTR_variant	FBgn0265575	yin	ND
X	3820791	T	T	G	SNP	MA19	1	intron_variant	FBgn0260658	CG42541	ND
X	3942271	CCC	CCC	C--	DEL	MA12	0.4375	non_coding_exon_variant	FBgn0267038	CR45482	ND
X	4014518	G	G	T	SNP	MA12	1	intron_variant	FBgn0026083	tyf	ND
X	4147917	A	A	T	SNP	MA03	0.952381	intergenic_region	-	-	ND
X	4167913	C	C	T	SNP	MA24	0.277778	intergenic_region	-	-	ND
X	4204517	G	G	A	SNP	MA16	0.972222	downstream_gene_variant	FBgn0040906	CG15579	ND
X	4232232	C	C	T	SNP	MA20	0.222222	intron_variant	FBgn0262738	norpA	ND
X	4294710	G	G	A	SNP	MA06	0.245283	intron_variant	FBgn0052773	CR32773	ND
X	4389101	G	G	C	SNP	MA19	1	intron_variant	FBgn0052773	CR32773	ND
X	4480863	AA	AA	A-	DEL	MA19	1	intron_variant	FBgn0052773	CR32773	ND
X	4518296	G	G	A	SNP	MA02	0.571429	missense_variant	FBgn0003053	peb	ND
X	4593722	CATA	CATA	C---	DEL	MA16	0.973684	3_prime_UTR_variant	FBgn0011760	ctp	ND
X	4698994	C	C	T	SNP	MA13	1	upstream_gene_variant	FBgn0029728	CG2861	ND
X	4735848	T	T	C	SNP	MA08	0.619048	intron_variant	FBgn0260971	CG42594	ND
X	4759674	G	G	T	SNP	MA11	0.407407	intron_variant	FBgn0260971	CG42594	ND
X	4970335	ACAATG	ACAATC	GCAATC	SNP	MA19	1	3_prime_UTR_variant	FBgn0052767	CG32767	ND
X	5008598	CCT	CCA	C-A	DEL	MA25	0.961538	intron_variant	FBgn0266098	rg	ND
X	5040925	T	T	G	SNP	MA08	0.965517	intron_variant	FBgn0266098	rg	ND
X	5125402	T	T	A	SNP	MA13	0.972973	intron_variant	FBgn0266098	rg	ND
X	5195127	C	C	A	SNP	MA10	1	intron_variant	FBgn0261803	CG42749	ND
X	5300478	CCACAATTGATC	CCACAATTGATC	C-----------	DEL	MA13	0.244898	frameshift_variant	FBgn0029762	NAAT1	ND
X	5302038	C	C	T	SNP	MA19	0.833333	intron_variant	FBgn0029762	NAAT1	ND
X	5439677	A	A	G	SNP	MA13	0.204082	intron_variant	FBgn0263512	Vsx2	ND
X	5439828	C	C	A	SNP	MA13	0.276923	intron_variant	FBgn0263512	Vsx2	ND
X	5439840	G	G	T	SNP	MA13	0.352941	intron_variant	FBgn0263512	Vsx2	ND
X	5499423	G	G	C	SNP	MA06	0.322581	intron_variant	FBgn0263511	Vsx1	ND
X	5538661	T	T	C	SNP	MA20	0.333333	intron_variant	FBgn0259994	CG42492	ND
X	5820409	C	C	A	SNP	MA19	0.85	intron_variant	FBgn0029824	CG3726	ND
X	5845736	C	C	T	SNP	MA18	0.22807	3_prime_UTR_variant	FBgn0052755	CG32755	ND
X	6007854	CTAAAA	CTAAAG	TTAAAG	SNP	MA17	0.74359	intron_variant	FBgn0264386	Ca-alpha1T	ND
X	6041700	G--------	A--------	GTGTGCATA	COMPLEX	MA12	0.882353	intron_variant	FBgn0264386	Ca-alpha1T	ND
X	6049156	CAATGCCACC	CAATGCCACC	C---------	DEL	MA13	0.446429	intron_variant	FBgn0264386	Ca-alpha1T	ND
X	6108697	T	T	C	SNP	MA01	0.371429	intergenic_region	-	-	ND
X	6118564	AGCTCTC	AGCTCTC	A------	DEL	MA01	0.972973	intron_variant	FBgn0003514	sqh	ND
X	6202345	T	T	G	SNP	MA10	0.888889	upstream_gene_variant	FBgn0029864	CG15894	ND
X	6243746	A	A	C	SNP	MA02	0.382353	missense_variant	FBgn0029868	CG3446	ND
X	6339199	C	C	A	SNP	MA17	0.975	intron_variant	FBgn0259242	CG42340	ND
X	6620765	C	C	T	SNP	MA11	0.510204	5_prime_UTR_variant	FBgn0029896	CG3168	ND
X	6676416	G	G	C	SNP	MA19	0.806452	missense_variant	FBgn0259228	C3G	ND
X	6684386	G	G	T	SNP	MA03	1	5_prime_UTR_variant	FBgn0259228	C3G	ND
X	6696674	G	G	A	SNP	MA20	0.952381	intron_variant	FBgn0259228	C3G	ND
X	6864981	C	C	G	SNP	MA01	1	missense_variant	FBgn0029924	CG4586	ND
X	6911801	A-	A-	AA	INS	MA18	0.342105	intergenic_region	-	-	ND
X	7080657	T	T	C	SNP	MA18	0.333333	intron_variant	FBgn0029939	CG9650	ND
X	7130609	C	C	T	SNP	MA19	0.761905	intron_variant	FBgn0029939	CG9650	ND
X	7253525	AAGCAATTCATGCGCA	AAGCAATTCATGCGCA	A------TC-------	COMPLEX	MA07	1	frameshift_variant	FBgn0029947	CG1999	ND
X	7364373	C	C	T	SNP	MA14	0.236842	intergenic_region	-	-	ND
X	7432335	A	A	T	SNP	MA03	1	intron_variant	FBgn0052719	CG32719	ND
X	7483116	G	G	A	SNP	MA01	0.885714	intergenic_region	-	-	ND
X	7546607	A	A	C	SNP	MA19	0.958333	intron_variant	FBgn0004198	ct	ND
X	7602930	G	G	A	SNP	MA24	0.709677	intron_variant	FBgn0029504	CHES-1-like	ND
X	7676332	A	A	G	SNP	MA17	0.945946	intergenic_region	-	-	ND
X	7982183	ATAATAAGATTAATTA	ATAATAAGATTAATTA	A---------------	DEL	MA25	1	3_prime_UTR_variant	FBgn0029996	Ubc-E2H	ND
X	8226850	CCG	CCT	C-T	DEL	MA06	1	intron_variant	FBgn0015519	nAChRalpha3	ND
X	8318947	C	C	A	SNP	MA18	1	stop_gained	FBgn0261793	Trf2	ND
X	8355580	G	G	A	SNP	MA11	0.208333	5_prime_UTR_variant	FBgn0023506	Es2	ND
X	8375774	G	G	C	SNP	MA25	0.725	intron_variant	FBgn0053223	CG33223	ND
X	8412058	G	G	T	SNP	MA06	0.587302	5_prime_UTR_premature_start_codon_gain_variant	FBgn0264975	Nrg	ND
X	8632282	T-	T-	TT	INS	MA25	0.432432	intergenic_region	-	-	ND
X	8634710	G	G	T	SNP	MA19	0.847826	intergenic_region	-	-	ND
X	8639007	A---------AAC	A---------AAT	AGACAGCTAAAAT	INS	MA18	0.380952	intergenic_region	-	-	ND
X	8803871	C	C	A	SNP	MA08	0.32	intron_variant	FBgn0261549	rdgA	ND
X	9098224	AAATCC	AAATCC	GAATCT	COMPLEX	MA19	0.266667	intergenic_region	-	-	ND
X	9109956	G	G	A	SNP	MA16	0.238095	missense_variant	FBgn0030104	CG15368	ND
X	9294632	G	G	C	SNP	MA05	0.5625	intron_variant	FBgn0261260	mgl	ND
X	9735292	A	A	G	SNP	MA06	0.642857	intron_variant	FBgn0052698	CG32698	ND
X	9759647	G	G	A	SNP	MA02	0.5	splice_region_variant	FBgn0019929	Ser7	ND
X	9780254	C	C	T	SNP	MA19	0.619048	intergenic_region	-	-	ND
X	9786904	T	T	C	SNP	MA15	0.703704	intron_variant	FBgn0030161	CG15249	ND
X	9799493	G	G	C	SNP	MA24	0.266667	intergenic_region	-	-	ND
X	9817518	A	A	G	SNP	MA04	1	intergenic_region	-	-	ND
X	9902668	C	C	T	SNP	MA19	0.678571	upstream_gene_variant	FBgn0053557	CG33557	ND
X	9912791	T	T	C	SNP	MA14	1	intron_variant	FBgn0263132	Cht6	ND
X	9917377	C	C	A	SNP	MA11	0.275	intron_variant	FBgn0263132	Cht6	Yes	TTCGGCGATATGATAAATGG	GTGCTCCATCAAGTTGGTCA
X	9943057	TAAATCC	TAAATCC	AGAATCT	COMPLEX	MA20	0.210526	intron_variant	FBgn0263132	Cht6	ND
X	10008494	T	T	C	SNP	MA09	1	non_coding_exon_variant	FBgn0266199	CR44894	ND
X	10132609	G	G	A	SNP	MA04	0.967742	3_prime_UTR_variant	FBgn0263220	Hk	ND
X	10174479	TACC	T---	TCCC	INS	MA06	0.206897	intron_variant	FBgn0259170	alpha-Man-I	ND
X	10463013	CATGCGGCATGGGAC	CATGCGGCATGGGAC	C--------------	DEL	MA08	1	intron_variant	FBgn0085443	spri	ND
X	10553700	CAT	CAT	C--	DEL	MA22	0.576923	frameshift_variant	FBgn0030223	CG2111	ND
X	10595255	TT	TT	T-	DEL	MA19	0.6875	intron_variant	FBgn0052677	X11Lbeta	ND
X	10626581	C	C	T	SNP	MA19	0.47619	intron_variant	FBgn0052676	CG32676	ND
X	10659724	T	T	C	SNP	MA18	0.756757	missense_variant	FBgn0052672	Atg8a	ND
X	10779117	C	C	T	SNP	MA05	0.285714	intron_variant	FBgn0017561	Ork1	ND
X	10787207	G	G	T	SNP	MA07	0.25	upstream_gene_variant	FBgn0265717	CR44524	ND
X	10800970	C	C	G	SNP	MA07	1	missense_variant	FBgn0264502	CG43901	ND
X	10830605	T	T	C	SNP	MA06	1	intron_variant	FBgn0263705	Myo10A	ND
X	10872313	C	C	T	SNP	MA20	1	intron_variant	FBgn0259241	CG42339	ND
X	10918250	AAAATCA	A------	AAAATAA	INS	MA24	0.25	intron_variant	FBgn0259241	CG42339	ND
X	10974503	TTCACATG	TTCACATG	T----A--	COMPLEX	MA05	0.217391	intron_variant	FBgn0003366	sev	ND
X	11215034	A	A	C	SNP	MA02	0.461538	downstream_gene_variant	FBgn0003411	sisA	ND
X	11304483	A	A	T	SNP	MA03	0.294118	intron_variant	FBgn0030296	CG15196	ND
X	11407028	TT	TT	T-	DEL	MA01	0.368421	intron_variant	FBgn0052666	Drak	ND
X	11409682	A	A	T	SNP	MA03	1	intron_variant	FBgn0052666	Drak	ND
X	11428078	AA	AA	A-	DEL	MA19	0.533333	intron_variant	FBgn0052666	Drak	ND
X	11498522	T	T	C	SNP	MA22	1	missense_variant	FBgn0030318	rho-4	ND
X	11564302	C	C	T	SNP	MA04	1	intron_variant	FBgn0004370	Ptp10D	ND
X	11624883	T	T	G	SNP	MA12	1	intron_variant	FBgn0030331	CG15221	ND
X	11653172	T	T	A	SNP	MA11	0.291667	intron_variant	FBgn0002577	m	ND
X	11905957	T	C	T	SNP	MA06	1	missense_variant	FBgn0030361	CG1492	ND
X	11938044	C	C	T	SNP	MA13	0.483871	5_prime_UTR_variant	FBgn0267001	Ten-a	ND
X	12019536	TTACT	TTACT	T----	DEL	MA12	0.533333	intron_variant	FBgn0267001	Ten-a	ND
X	12133409	G	G	A	SNP	MA10	0.266667	intron_variant	FBgn0267001	Ten-a	ND
X	12174341	G	G	A	SNP	MA04	1	intron_variant	FBgn0267001	Ten-a	ND
X	12591909	C	C	A	SNP	MA18	0.473684	intron_variant	FBgn0265523	Smr	ND
X	12654931	T	T	C	SNP	MA05	1	3_prime_UTR_variant	FBgn0030420	CG12717	ND
X	12748836	G	G	T	SNP	MA01	1	intron_variant	FBgn0259171	Pde9	ND
X	12875580	GTGTGCGTGCG	G----------	GTGTGTGTGTG	INS	MA18	0.238095	intergenic_region	-	-	ND
X	12890185	T	T	G	SNP	MA11	0.204545	intron_variant	FBgn0265597	rad	ND
X	12990564	CCA	CCT	C-T	DEL	MA01	0.957447	3_prime_UTR_variant	FBgn0263005	CG43313	ND
X	13008600	T	T	A	SNP	MA09	1	upstream_gene_variant	FBgn0250862	CG42237	ND
X	13068635	C	C	T	SNP	MA19	0.764706	intron_variant	FBgn0085440	CG34411	ND
X	13199532	G	G	T	SNP	MA07	1	non_coding_exon_variant	FBgn0266376	CR45018	ND
X	13334056	GCAATTAGATTTATTG	GCAATTAGATTTATTG	G---------------	DEL	MA11	0.26087	intergenic_region	-	-	ND
X	13497556	A	A	T	SNP	MA11	0.25641	upstream_gene_variant	FBgn0265865	CR44654	ND
X	13633168	C	C	T	SNP	MA11	0.395833	3_prime_UTR_variant	FBgn0030518	CG11134	ND
X	13688134	A-	A-	AA	INS	MA17	0.923077	intron_variant	FBgn0261244	inaE	ND
X	13752185	T-	T-	TG	INS	MA01	0.214286	3_prime_UTR_variant	FBgn0267033	mamo	ND
X	13962752	TGTGTATCTGTGT	T------------	T----------GT	INS	MA19	0.625	intergenic_region	-	-	ND
X	14188322	A	A	G	SNP	MA19	0.410256	downstream_gene_variant	FBgn0266278	CR44963	ND
X	14485849	G	G	A	SNP	MA14	0.441176	intron_variant	FBgn0030574	CG9413	ND
X	14554386	C--------------	C--------------	TAATGATAATAATTT	COMPLEX	MA06	1	intergenic_region	-	-	ND
X	14559337	A	A	G	SNP	MA14	0.571429	intergenic_region	-	-	ND
X	14596992	G	G	T	SNP	MA25	0.586957	missense_variant	FBgn0262534	CG43088	ND
X	14738375	TT	TT	GG	MNP	MA12	1	missense_variant	FBgn0030586	CG12539	ND
X	14775277	C	C	G	SNP	MA13	0.479592	intron_variant	FBgn0264078	Flo2	ND
X	14900830	C	C	T	SNP	MA13	0.428571	3_prime_UTR_variant	FBgn0000535	eag	ND
X	14988406	C	C	T	SNP	MA09	1	synonymous_variant	FBgn0030613	Rab3-GEF	ND
X	15037701	G	G	C	SNP	MA25	1	intron_variant	FBgn0030617	CG9095	ND
X	15133541	C	C	T	SNP	MA24	0.518519	intergenic_region	-	-	ND
X	15148166	G	G	A	SNP	MA20	0.541667	intergenic_region	-	-	ND
X	15245767	C	C	G	SNP	MA14	0.243243	3_prime_UTR_variant	FBgn0000028	acj6	ND
X	15269669	G	G	T	SNP	MA22	0.884615	intron_variant	FBgn0000028	acj6	ND
X	15293383	C	C	T	SNP	MA13	0.988506	intron_variant	FBgn0263257	Cngl	ND
X	15375808	T	T	A	SNP	MA14	0.391304	upstream_gene_variant	FBgn0030648	CG6340	ND
X	15412550	C	C	G	SNP	MA09	1	intron_variant	FBgn0022710	Ac13E	ND
X	15495365	G	G	C	SNP	MA01	0.962963	intergenic_region	-	-	ND
X	15498096	A	A	T	SNP	MA24	0.208333	3_prime_UTR_variant	FBgn0003463	sog	ND
X	15539481	G	G	A	SNP	MA17	0.870968	downstream_gene_variant	FBgn0030663	CG8117	ND
X	15657788	A	A	G	SNP	MA19	0.703704	missense_variant	FBgn0030687	CG17209	ND
X	15667691	A	A	C	SNP	MA15	0.345455	missense_variant	FBgn0263747	CG43672	ND
X	15718592	C	C	A	SNP	MA05	1	3_prime_UTR_variant	FBgn0003345	sd	ND
X	15760357	T	T	A	SNP	MA01	0.744186	downstream_gene_variant	FBgn0001105	Gbeta13F	ND
X	15794117	GC	GC	TG	MNP	MA01	0.324324	intron_variant	FBgn0003392	shi	ND
X	15877019	A	A	T	SNP	MA14	0.526316	upstream_gene_variant	FBgn0030716	CG9170	ND
X	16199474	C	C	T	SNP	MA17	0.208955	synonymous_variant	FBgn0027521	CG3679	ND
X	16289782	A	A	C	SNP	MA08	1	missense_variant	FBgn0004367	mei-41	ND
X	16530427	C	C	T	SNP	MA06	0.971429	intron_variant	FBgn0026181	Rok	ND
X	16790888	T	T	C	SNP	MA19	0.6875	splice_acceptor_variant	FBgn0053252	CG33252	ND
X	16798740	T	T	G	SNP	MA01	1	non_coding_exon_variant	FBgn0265967	CR44754	ND
X	16821094	C	C	T	SNP	MA05	0.272727	intron_variant	FBgn0027556	CG4928	ND
X	16923567	G	G	C	SNP	MA11	0.444444	intron_variant	FBgn0266354	CG45002	ND
X	16950915	T	T	G	SNP	MA17	0.545455	intron_variant	FBgn0266354	CG45002	ND
X	16995175	C	C	T	SNP	MA17	1	intron_variant	FBgn0030817	CG4991	ND
X	17018870	G	G	C	SNP	MA02	0.241379	intron_variant	FBgn0260748	CG5004	ND
X	17162894	C	C	G	SNP	MA07	0.625	synonymous_variant	FBgn0262111	f	ND
X	17309509	A	A	G	SNP	MA05	1	intron_variant	FBgn0027602	CG8611	ND
X	17495042	A	A	C	SNP	MA02	0.558824	missense_variant	FBgn0026313	X11L	ND
X	17538432	G	G	T	SNP	MA13	0.977273	intron_variant	FBgn0026375	RhoGAPp190	ND
X	17645757	A	A	T	SNP	MA08	1	3_prime_UTR_variant	FBgn0261570	CG42684	ND
X	17761788	T	T	C	SNP	MA09	0.925926	3_prime_UTR_variant	FBgn0259168	mnb	ND
X	17804318	TT	TT	T-	DEL	MA01	0.238095	3_prime_UTR_variant	FBgn0027605	Vps4	ND
X	17876460	G	G	A	SNP	MA14	0.388889	intron_variant	FBgn0003380	Sh	ND
X	18024134	C	C	T	SNP	MA25	0.354167	intron_variant	FBgn0262607	CG43133	ND
X	18120063	G	G	T	SNP	MA09	0.40625	5_prime_UTR_variant	FBgn0053639	CG33639	ND
X	18143372	G	G	A	SNP	MA14	0.566667	intergenic_region	-	-	ND
X	18153516	A	A	C	SNP	MA24	0.333333	5_prime_UTR_premature_start_codon_gain_variant	FBgn0030905	CG15059	ND
X	18162580	G	G	A	SNP	MA19	0.529412	intergenic_region	-	-	ND
X	18164225	T	C	T	SNP	MA24	1	intergenic_region	-	-	Yes	GGAATCAAGTGCCAGGACAT	AGCGGGATGAGATGAGGAC
X	18580902	G	G	T	SNP	MA12	0.368421	intron_variant	FBgn0004959	phm	ND
X	18673438	A	A	C	SNP	MA25	0.98	intron_variant	FBgn0030955	CG6891	ND
X	18697639	CCG	CCT	C-T	DEL	MA08	0.952381	intron_variant	FBgn0004462	Pk17E	ND
X	18759801	CGGAC	CGGAC	C----	DEL	MA12	0.783784	intron_variant	FBgn0085430	CG34401	ND
X	18788868	C	C	A	SNP	MA25	0.361111	synonymous_variant	FBgn0030975	CG7349	ND
X	18869789	A	A	G	SNP	MA19	0.5	intron_variant	FBgn0264090	CG43759	ND
X	18997531	G	G	C	SNP	MA22	1	intergenic_region	-	-	ND
X	19043284	A	A	C	SNP	MA13	0.333333	intron_variant	FBgn0261461	RhoGAP18B	ND
X	19061295	G	G	T	SNP	MA04	0.512195	upstream_gene_variant	FBgn0261461	RhoGAP18B	ND
X	19400798	G	G	T	SNP	MA12	1	missense_variant	FBgn0027621	Pfrx	ND
X	19429180	G	G	A	SNP	MA19	0.714286	intron_variant	FBgn0052532	CG32532	ND
X	19623642	C	C	T	SNP	MA19	0.483871	3_prime_UTR_variant	FBgn0031064	CG12531	ND
X	19797336	C	C	A	SNP	MA24	0.96	synonymous_variant	FBgn0052529	Hers	Yes	GACGAGGAGCAACAGCCTAC	GCAGACCTGACTCGGAACTT
X	19933002	T	T	A	SNP	MA25	0.296296	intron_variant	FBgn0053517	Dop2R	ND
X	19966670	G	G	T	SNP	MA19	0.5	intergenic_region	-	-	ND
X	19981524	G	G	A	SNP	MA12	1	intergenic_region	-	-	ND
X	20044090	T	T	A	SNP	MA14	0.352941	splice_region_variant	FBgn0031089	CG9572	ND
X	20221567	G	G	C	SNP	MA02	0.285714	intergenic_region	-	-	ND
X	20255597	C	C	G	SNP	MA20	0.416667	upstream_gene_variant	FBgn0085340	CR34311	ND
X	20298759	C	C	T	SNP	MA14	0.412698	3_prime_UTR_variant	FBgn0031115	CG11710	ND
X	20633588	C	C	T	SNP	MA06	0.852941	3_prime_UTR_variant	FBgn0085387	shakB	ND
X	20650728	T-	T-	TT	INS	MA19	0.454545	intron_variant	FBgn0085387	shakB	ND
X	20659527	C	C	A	SNP	MA02	0.916667	intron_variant	FBgn0085387	shakB	Yes	GATCTCTGTGCTGCCAACAA	GTAGGGTTGTCGCTGTCGTT
X	20749786	T	T	C	SNP	MA19	0.470588	intron_variant	FBgn0085387	shakB	ND
X	20876727	T	T	G	SNP	MA08	0.4375	intergenic_region	-	-	ND
X	21062044	C	C	T	SNP	MA19	0.405405	intergenic_region	-	-	ND
X	21107385	T	T	G	SNP	MA01	0.28125	intron_variant	FBgn0052521	CG32521	ND
X	21123919	G	G	C	SNP	MA01	0.241379	intron_variant	FBgn0052521	CG32521	ND
X	21176439	AAG	AAT	A-T	DEL	MA16	0.931818	intron_variant	FBgn0031170	CG1718	ND
X	21195368	C	C	T	SNP	MA19	0.5	5_prime_UTR_premature_start_codon_gain_variant	FBgn0031174	CG1486	ND
X	21207627	GTATCATTC	GTATCTTTG	CTATCTTTG	SNP	MA09	0.461538	intron_variant	FBgn0015558	tty	ND
X	21392442	G	G	T	SNP	MA11	0.458333	intergenic_region	-	-	ND
X	21832957	GTG	GTG	CA-	COMPLEX	MA12	0.432432	intergenic_region	-	-	ND
X	21835922	TCTA	TCTA	CCTT	COMPLEX	MA07	0.488889	intergenic_region	-	-	ND
X	22065401	C	C	T	SNP	MA03	0.294118	intron_variant	FBgn0266348	CR44997	ND
X	22140171	TG-	GG-	TGG	COMPLEX	MA20	0.5625	intron_variant	FBgn0266348	CR44997	ND
X	22164153	T	T	A	SNP	MA12	0.83871	intron_variant	FBgn0266348	CR44997	ND
X	22227196	C	C	T	SNP	MA19	0.461538	3_prime_UTR_variant	FBgn0000719	fog	ND

## Sheet: C
C. GO enrichment analysis of mutations
GO Category	GO ID	GO Description	Observed Number of Genes With Mutations	Expected Number of Genes With Mutations	P-value	FDR
Biological Process	GO:0007398	ectoderm development	13	5.5697	0.00029997	0.185081
Biological Process	GO:0010951	negative regulation of endopeptidase activity	4	0.6882	0.00379962	1
Molecular Function	GO:0003684	damaged DNA binding	4	0.879	0.00849915	1
Molecular Function	GO:0030533	triplet codon-amino acid adaptor activity	2	0.1775	0.0129987	1
Cellular Component	GO:0005783	endoplasmic reticulum	19	11.5495	0.0134987	1
Biological Process	GO:0035277	spiracle morphogenesis, open tracheal system	10	5.5092	0.0150985	1
Biological Process	GO:0046331	lateral inhibition	34	24.7969	0.0174983	1
Biological Process	GO:0016318	ommatidial rotation	13	8.1176	0.0192981	1
Molecular Function	GO:0008237	metallopeptidase activity	7	3.148	0.020098	1
Biological Process	GO:0042127	regulation of cell proliferation	9	4.6915	0.0210979	1
Biological Process	GO:0035147	branch fusion, open tracheal system	9	5.1295	0.0219978	1
Biological Process	GO:0035011	melanotic encapsulation of foreign target	8	4.0598	0.0264974	1
Molecular Function	GO:0004252	serine-type endopeptidase activity	15	9.0029	0.0314969	1
Biological Process	GO:0009888	tissue development	5	2.0645	0.0367963	1
Biological Process	GO:0007389	pattern specification process	7	3.587	0.0369963	1
Biological Process	GO:0007367	segment polarity determination	8	4.4737	0.0459954	1
Biological Process	GO:0001736	establishment of planar polarity	10	6.241	0.0485951	1
Molecular Function	GO:0003676	nucleic acid binding	44	35.6322	0.050195	1
Biological Process	GO:0019731	antibacterial humoral response	3	0.8702	0.0539946	1
Molecular Function	GO:0052689	carboxylic ester hydrolase activity	5	2.1515	0.0543946	1
Molecular Function	GO:0008134	transcription factor binding	16	11.0652	0.0583942	1
Biological Process	GO:0007017	microtubule-based process	9	5.3182	0.060394	1
Biological Process	GO:0050832	defense response to fungus	7	3.8045	0.0613939	1
Biological Process	GO:0007409	axonogenesis	15	10.6256	0.0621938	1
Molecular Function	GO:0004867	serine-type endopeptidase inhibitor activity	6	3.1674	0.0634937	1
Cellular Component	GO:0045169	fusome	9	5.5445	0.070293	1
Molecular Function	GO:0003690	double-stranded DNA binding	4	1.6892	0.0725927	1
Biological Process	GO:0007498	mesoderm development	17	12.245	0.0728927	1
Molecular Function	GO:0004674	protein serine/threonine kinase activity	30	23.6708	0.0748925	1
Cellular Component	GO:0016459	myosin complex	6	3.1552	0.0783922	1
Biological Process	GO:0006357	regulation of transcription from RNA polymerase II promoter	24	18.7487	0.0857914	1
Molecular Function	GO:0003824	catalytic activity	7	4.0602	0.0860914	1
Biological Process	GO:0006888	ER to Golgi vesicle-mediated transport	3	1.0612	0.0865913	1
Cellular Component	GO:0005769	early endosome	6	3.4488	0.089791	1
Biological Process	GO:0000910	cytokinesis	5	2.5159	0.10019	1
Cellular Component	GO:0000785	chromatin	7	4.064	0.10029	1
Cellular Component	GO:0005829	cytosol	13	9.0091	0.108289	1
Biological Process	GO:0016337	single organismal cell-cell adhesion	8	5.3208	0.114089	1
Biological Process	GO:0006508	proteolysis	33	27.1363	0.117888	1
Biological Process	GO:0000122	negative regulation of transcription from RNA polymerase II promoter	26	21.0505	0.118488	1
Biological Process	GO:0007291	sperm individualization	8	5.2991	0.122388	1
Cellular Component	GO:0005884	actin filament	5	2.9249	0.129087	1
Molecular Function	GO:0000981	sequence-specific DNA binding RNA polymerase II transcription factor activity	6	3.6617	0.133087	1
Biological Process	GO:0008293	torso signaling pathway	7	4.547	0.133687	1
Molecular Function	GO:0005484	SNAP receptor activity	3	1.5723	0.135386	1
Molecular Function	GO:0015171	amino acid transmembrane transporter activity	5	2.7668	0.135486	1
Biological Process	GO:0016081	synaptic vesicle docking involved in exocytosis	4	2.2576	0.135686	1
Biological Process	GO:0016042	lipid catabolic process	4	2.061	0.136786	1
Biological Process	GO:0042067	establishment of ommatidial planar polarity	10	7.2696	0.136886	1
Biological Process	GO:0022416	chaeta development	13	9.8521	0.138286	1
Biological Process	GO:0030162	regulation of proteolysis	6	3.8074	0.140386	1
Biological Process	GO:0016310	phosphorylation	6	3.7946	0.141286	1
Biological Process	GO:0006955	immune response	7	4.5305	0.142186	1
Biological Process	GO:0006909	phagocytosis	24	19.4929	0.143786	1
Biological Process	GO:0003333	amino acid transmembrane transport	5	2.8484	0.145385	1
Biological Process	GO:0000281	mitotic cytokinesis	7	4.5331	0.145885	1
Biological Process	GO:0006412	translation	7	4.3432	0.148385	1
Cellular Component	GO:0005768	endosome	6	3.8431	0.153185	1
Biological Process	GO:0051090	regulation of sequence-specific DNA binding transcription factor activity	3	1.4179	0.154785	1
Cellular Component	GO:0000502	proteasome complex	2	0.7307	0.162384	1
Cellular Component	GO:0030496	midbody	4	2.2867	0.166683	1
Biological Process	GO:0016321	female meiosis chromosome segregation	5	2.9564	0.167383	1
Biological Process	GO:0040008	regulation of growth	5	3.0823	0.168283	1
Biological Process	GO:0007423	sensory organ development	12	9.212	0.171383	1
Biological Process	GO:0007629	flight behavior	7	4.9041	0.172283	1
Molecular Function	GO:0004879	ligand-activated sequence-specific DNA binding RNA polymerase II transcription factor activity	8	5.8538	0.176082	1
Biological Process	GO:0009617	response to bacterium	3	1.5394	0.176082	1
Molecular Function	GO:0000976	transcription regulatory region sequence-specific DNA binding	8	5.756	0.180882	1
Biological Process	GO:0042742	defense response to bacterium	4	2.2672	0.182982	1
Molecular Function	GO:0005096	GTPase activator activity	6	4.0128	0.183482	1
Biological Process	GO:0071456	cellular response to hypoxia	7	5.0859	0.187581	1
Biological Process	GO:0007424	open tracheal system development	27	23.2953	0.187881	1
Biological Process	GO:0007400	neuroblast fate determination	7	4.957	0.188181	1
Biological Process	GO:0045214	sarcomere organization	7	4.9205	0.188781	1
Biological Process	GO:0007611	learning or memory	13	10.4847	0.189481	1
Biological Process	GO:0001737	establishment of imaginal disc-derived wing hair orientation	7	5.0389	0.189781	1
Molecular Function	GO:0030246	carbohydrate binding	7	4.852	0.19578	1
Molecular Function	GO:0003899	DNA-directed RNA polymerase activity	2	0.8336	0.19728	1
Molecular Function	GO:0042803	protein homodimerization activity	20	16.8457	0.19938	1
Biological Process	GO:0007307	eggshell chorion gene amplification	3	1.5961	0.20458	1
Biological Process	GO:0006342	chromatin silencing	5	3.238	0.20498	1
Biological Process	GO:0007179	transforming growth factor beta receptor signaling pathway	5	3.3546	0.210179	1
Cellular Component	GO:0005635	nuclear envelope	6	4.355	0.211579	1
Molecular Function	GO:0004177	aminopeptidase activity	4	2.4167	0.214479	1
Molecular Function	GO:0005102	receptor binding	5	3.3447	0.222378	1
Biological Process	GO:0040007	growth	5	3.4051	0.223778	1
Biological Process	GO:0008595	anterior/posterior axis specification, embryo	6	4.3557	0.230877	1
Molecular Function	GO:0005328	neurotransmitter:sodium symporter activity	3	1.6943	0.233277	1
Biological Process	GO:0006816	calcium ion transport	6	4.2664	0.233777	1
Biological Process	GO:0055059	asymmetric neuroblast division	6	4.2813	0.233877	1
Biological Process	GO:0016192	vesicle-mediated transport	11	8.7206	0.235976	1
Molecular Function	GO:0003682	chromatin binding	13	10.6066	0.236876	1
Biological Process	GO:0048149	behavioral response to ethanol	12	9.8379	0.241476	1
Biological Process	GO:0042051	compound eye photoreceptor development	7	5.3312	0.243776	1
Biological Process	GO:0032504	multicellular organism reproduction	8	6.0642	0.246875	1
Biological Process	GO:0009953	dorsal/ventral pattern formation	4	2.6283	0.249875	1
Cellular Component	GO:0031201	SNARE complex	3	1.8974	0.251675	1
Biological Process	GO:0007030	Golgi organization	6	4.3402	0.252675	1
Cellular Component	GO:0022625	cytosolic large ribosomal subunit	2	0.9658	0.255274	1
Molecular Function	GO:0008138	protein tyrosine/serine/threonine phosphatase activity	3	1.7802	0.258174	1
Biological Process	GO:0008355	olfactory learning	16	13.7355	0.259174	1
Biological Process	GO:0035159	regulation of tube length, open tracheal system	7	5.4167	0.261874	1
Molecular Function	GO:0030170	pyridoxal phosphate binding	3	1.782	0.262974	1
Molecular Function	GO:0019992	diacylglycerol binding	6	4.5138	0.265273	1
Biological Process	GO:0007444	imaginal disc development	7	5.3677	0.265573	1
Cellular Component	GO:0016021	integral component of membrane	107	101.662	0.266773	1
Biological Process	GO:0009593	detection of chemical stimulus	3	1.8726	0.268073	1
Molecular Function	GO:0005214	structural constituent of chitin-based cuticle	5	3.5094	0.269873	1
Biological Process	GO:0007391	dorsal closure	21	18.4617	0.273473	1
Molecular Function	GO:0003714	transcription corepressor activity	4	2.7476	0.274173	1
Biological Process	GO:0030866	cortical actin cytoskeleton organization	3	1.842	0.276372	1
Biological Process	GO:0055085	transmembrane transport	28	25.0735	0.279572	1
Biological Process	GO:0006511	ubiquitin-dependent protein catabolic process	6	4.4372	0.280172	1
Cellular Component	GO:0030532	small nuclear ribonucleoprotein complex	2	1.0456	0.280372	1
Biological Process	GO:0035220	wing disc development	12	9.9936	0.282572	1
Biological Process	GO:0007552	metamorphosis	7	5.556	0.283672	1
Biological Process	GO:0008103	oocyte microtubule cytoskeleton polarization	4	2.8432	0.283772	1
Biological Process	GO:0046427	positive regulation of JAK-STAT cascade	3	1.9062	0.289871	1
Cellular Component	GO:0005669	transcription factor TFIID complex	2	1.0829	0.292471	1
Biological Process	GO:0035556	intracellular signal transduction	15	13.0306	0.294071	1
Biological Process	GO:0006468	protein phosphorylation	36	33.012	0.29587	1
Biological Process	GO:0007608	sensory perception of smell	9	7.4558	0.29597	1
Biological Process	GO:0007088	regulation of mitosis	3	1.9217	0.29627	1
Biological Process	GO:0007298	border follicle cell migration	22	19.6993	0.29797	1
Biological Process	GO:0018345	protein palmitoylation	2	1.147	0.30107	1
Molecular Function	GO:0000149	SNARE binding	3	2.06	0.30257	1
Molecular Function	GO:0008236	serine-type peptidase activity	4	2.8956	0.30377	1
Biological Process	GO:0050830	defense response to Gram-positive bacterium	3	1.9753	0.30447	1
Cellular Component	GO:0005667	transcription factor complex	8	6.4668	0.30487	1
Biological Process	GO:0006414	translational elongation	2	1.1743	0.307869	1
Biological Process	GO:0016360	sensory organ precursor cell fate determination	5	3.8068	0.308369	1
Molecular Function	GO:0005200	structural constituent of cytoskeleton	7	5.65	0.313669	1
Biological Process	GO:0007422	peripheral nervous system development	18	16.0971	0.316768	1
Molecular Function	GO:0050839	cell adhesion molecule binding	9	7.6853	0.320668	1
Molecular Function	GO:0019706	protein-cysteine S-palmitoyltransferase activity	2	1.1788	0.321568	1
Biological Process	GO:0007443	Malpighian tubule morphogenesis	9	7.6031	0.321868	1
Biological Process	GO:0042048	olfactory behavior	9	7.5464	0.322668	1
Biological Process	GO:0000278	mitotic cell cycle	6	4.7576	0.322868	1
Biological Process	GO:0007427	epithelial cell migration, open tracheal system	10	8.5104	0.323968	1
Cellular Component	GO:0005839	proteasome core complex	1	0.3896	0.324368	1
Molecular Function	GO:0008017	microtubule binding	13	11.2526	0.325067	1
Molecular Function	GO:0005198	structural molecule activity	6	4.8003	0.325167	1
Biological Process	GO:0019991	septate junction assembly	5	3.8471	0.327367	1
Molecular Function	GO:0046872	metal ion binding	37	34.5772	0.331267	1
Molecular Function	GO:0042623	ATPase activity, coupled	9	7.5842	0.333867	1
Biological Process	GO:0006813	potassium ion transport	9	7.6847	0.337566	1
Molecular Function	GO:0016702	oxidoreductase activity, acting on single donors with incorporation of molecular oxygen, incorporation of two atoms of oxygen	2	1.1941	0.338166	1
Biological Process	GO:0006836	neurotransmitter transport	3	2.0614	0.340066	1
Biological Process	GO:0007156	homophilic cell adhesion	14	12.5446	0.340866	1
Biological Process	GO:0001708	cell fate specification	4	2.9707	0.341466	1
Molecular Function	GO:0004656	procollagen-proline 4-dioxygenase activity	2	1.1964	0.341666	1
Molecular Function	GO:0004298	threonine-type endopeptidase activity	1	0.4114	0.341766	1
Molecular Function	GO:0008301	DNA binding, bending	3	2.0854	0.345265	1
Biological Process	GO:0007417	central nervous system development	16	14.3334	0.345965	1
Molecular Function	GO:0005549	odorant binding	3	2.0856	0.348865	1
Biological Process	GO:0006952	defense response	7	5.771	0.351265	1
Biological Process	GO:0031987	locomotion involved in locomotory behavior	5	3.9914	0.353465	1
Biological Process	GO:0007165	signal transduction	24	22.2155	0.354365	1
Molecular Function	GO:0008553	hydrogen-exporting ATPase activity, phosphorylative mechanism	1	0.4337	0.356264	1
Biological Process	GO:0007379	segment specification	6	4.9058	0.356264	1
Molecular Function	GO:0015450	P-P-bond-hydrolysis-driven protein transmembrane transporter activity	1	0.4375	0.358164	1
Biological Process	GO:0017148	negative regulation of translation	8	6.9462	0.362564	1
Biological Process	GO:0007390	germ-band shortening	5	3.9963	0.364264	1
Molecular Function	GO:0009055	electron carrier activity	5	3.9683	0.365263	1
Biological Process	GO:0008258	head involution	8	6.9185	0.370163	1
Biological Process	GO:0045087	innate immune response	4	3.0993	0.370563	1
Molecular Function	GO:0004984	olfactory receptor activity	2	1.3071	0.377662	1
Cellular Component	GO:0005700	polytene chromosome	14	12.6399	0.378362	1
Biological Process	GO:0007265	Ras protein signal transduction	5	4.085	0.379162	1
Cellular Component	GO:0005789	endoplasmic reticulum membrane	3	2.2117	0.379262	1
Molecular Function	GO:0005179	hormone activity	2	1.301	0.379462	1
Biological Process	GO:0007476	imaginal disc-derived wing morphogenesis	52	49.8911	0.380062	1
Biological Process	GO:0007507	heart development	15	13.6509	0.381562	1
Molecular Function	GO:0004888	transmembrane signaling receptor activity	7	6.0191	0.383862	1
Molecular Function	GO:0003735	structural constituent of ribosome	4	3.1544	0.387561	1
Biological Process	GO:0007606	sensory perception of chemical stimulus	8	6.9827	0.389561	1
Biological Process	GO:0030178	negative regulation of Wnt signaling pathway	6	5.0602	0.391061	1
Molecular Function	GO:0000166	nucleotide binding	23	21.6414	0.391861	1
Biological Process	GO:0030177	positive regulation of Wnt signaling pathway	4	3.1806	0.392161	1
Molecular Function	GO:0046983	protein dimerization activity	6	5.0972	0.394361	1
Biological Process	GO:0009790	embryo development	10	8.9786	0.39706	1
Molecular Function	GO:0003700	sequence-specific DNA binding transcription factor activity	67	64.9905	0.39896	1
Biological Process	GO:0006397	mRNA processing	2	1.3854	0.39956	1
Molecular Function	GO:0003777	microtubule motor activity	7	6.0736	0.40326	1
Biological Process	GO:0007346	regulation of mitotic cell cycle	4	3.1933	0.40476	1
Molecular Function	GO:0031418	L-ascorbic acid binding	2	1.3735	0.405159	1
Biological Process	GO:0007623	circadian rhythm	8	7.0719	0.409559	1
Molecular Function	GO:0008513	secondary active organic cation transmembrane transporter activity	2	1.3986	0.414659	1
Biological Process	GO:0008063	Toll signaling pathway	4	3.2763	0.417258	1
Cellular Component	GO:0005811	lipid particle	14	12.92	0.417458	1
Cellular Component	GO:0005634	nucleus	145	142.744	0.421158	1
Biological Process	GO:0007131	reciprocal meiotic recombination	2	1.4297	0.424158	1
Biological Process	GO:0002121	inter-male aggressive behavior	13	12.1	0.427057	1
Biological Process	GO:0048193	Golgi vesicle transport	1	0.5451	0.428957	1
Biological Process	GO:0007420	brain development	9	8.1742	0.431457	1
Biological Process	GO:0016319	mushroom body development	15	14.0926	0.432057	1
Biological Process	GO:0007419	ventral cord development	8	7.1844	0.432857	1
Biological Process	GO:0008104	protein localization	10	9.1871	0.432857	1
Molecular Function	GO:0043565	sequence-specific DNA binding	36	34.769	0.434257	1
Biological Process	GO:0007173	epidermal growth factor receptor signaling pathway	7	6.2554	0.437256	1
Cellular Component	GO:0035327	transcriptionally active chromatin	3	2.3881	0.439356	1
Molecular Function	GO:0050660	flavin adenine dinucleotide binding	4	3.3719	0.439656	1
Biological Process	GO:0045746	negative regulation of Notch signaling pathway	8	7.2502	0.440556	1
Biological Process	GO:0006814	sodium ion transport	5	4.3342	0.442956	1
Biological Process	GO:0000226	microtubule cytoskeleton organization	4	3.381	0.444756	1
Biological Process	GO:0000902	cell morphogenesis	6	5.3013	0.445555	1
Biological Process	GO:0007369	gastrulation	4	3.3647	0.446255	1
Biological Process	GO:0006281	DNA repair	3	2.4622	0.451055	1
Biological Process	GO:0000022	mitotic spindle elongation	4	3.4342	0.453255	1
Biological Process	GO:0007362	terminal region determination	5	4.3827	0.457454	1
Biological Process	GO:0035317	imaginal disc-derived wing hair organization	5	4.3844	0.457454	1
Biological Process	GO:0006099	tricarboxylic acid cycle	3	2.4904	0.458254	1
Biological Process	GO:0008407	chaeta morphogenesis	9	8.345	0.459754	1
Cellular Component	GO:0005762	mitochondrial large ribosomal subunit	1	0.6145	0.460854	1
Biological Process	GO:0008285	negative regulation of cell proliferation	8	7.3548	0.460954	1
Molecular Function	GO:0008270	zinc ion binding	60	59.0933	0.462254	1
Biological Process	GO:0008152	metabolic process	10	9.3914	0.462454	1
Cellular Component	GO:0005681	spliceosomal complex	3	2.5254	0.462854	1
Cellular Component	GO:0032154	cleavage furrow	3	2.4875	0.463454	1
Biological Process	GO:0006486	protein glycosylation	2	1.53	0.465053	1
Biological Process	GO:0007616	long-term memory	12	11.3365	0.465253	1
Cellular Component	GO:0005874	microtubule	3	2.4738	0.465253	1
Biological Process	GO:0016055	Wnt signaling pathway	11	10.342	0.466353	1
Biological Process	GO:0006811	ion transport	5	4.4397	0.469853	1
Biological Process	GO:0045892	negative regulation of transcription, DNA-templated	13	12.4205	0.471153	1
Biological Process	GO:0048749	compound eye development	22	21.2878	0.472353	1
Biological Process	GO:0045451	pole plasm oskar mRNA localization	4	3.4851	0.473653	1
Molecular Function	GO:0004702	receptor signaling protein serine/threonine kinase activity	3	2.5208	0.476452	1
Biological Process	GO:0016246	RNA interference	3	2.5321	0.479952	1
Biological Process	GO:0045454	cell redox homeostasis	2	1.5912	0.480752	1
Cellular Component	GO:0000228	nuclear chromosome	2	1.5908	0.483652	1
Molecular Function	GO:0016787	hydrolase activity	3	2.5493	0.484352	1
Biological Process	GO:0030431	sleep	6	5.524	0.486851	1
Biological Process	GO:0050829	defense response to Gram-negative bacterium	7	6.5581	0.487651	1
Cellular Component	GO:0043231	intracellular membrane-bounded organelle	3	2.6246	0.491051	1
Cellular Component	GO:0005886	plasma membrane	79	78.4199	0.492351	1
Cellular Component	GO:0043234	protein complex	8	7.578	0.494351	1
Molecular Function	GO:0016887	ATPase activity	4	3.6174	0.49675	1
Biological Process	GO:0008587	imaginal disc-derived wing margin morphogenesis	8	7.5468	0.49875	1
Molecular Function	GO:0015035	protein disulfide oxidoreductase activity	1	0.67	0.49895	1
Biological Process	GO:0006626	protein targeting to mitochondrion	1	0.682	0.49945	1
Cellular Component	GO:0030018	Z disc	5	4.5768	0.50005	1
Biological Process	GO:0007280	pole cell migration	5	4.5703	0.50055	1
Molecular Function	GO:0004871	signal transducer activity	8	7.6017	0.50155	1
Cellular Component	GO:0005840	ribosome	2	1.6634	0.50485	1
Cellular Component	GO:0048471	perinuclear region of cytoplasm	8	7.5994	0.505149	1
Molecular Function	GO:0022857	transmembrane transporter activity	3	2.7101	0.510449	1
Biological Process	GO:0007399	nervous system development	17	16.6865	0.516248	1
Biological Process	GO:0045475	locomotor rhythm	10	9.6988	0.520548	1
Biological Process	GO:0009950	dorsal/ventral axis specification	4	3.6871	0.526047	1
Biological Process	GO:0007099	centriole replication	2	1.7241	0.528447	1
Biological Process	GO:0008406	gonad development	8	7.7491	0.529347	1
Biological Process	GO:0045089	positive regulation of innate immune response	2	1.7355	0.529547	1
Cellular Component	GO:0030424	axon	13	12.7703	0.529747	1
Biological Process	GO:0048666	neuron development	7	6.7434	0.530547	1
Cellular Component	GO:0008021	synaptic vesicle	9	8.7894	0.531247	1
Cellular Component	GO:0030286	dynein complex	3	2.7122	0.533347	1
Molecular Function	GO:0035091	phosphatidylinositol binding	3	2.7044	0.534747	1
Biological Process	GO:0006914	autophagy	6	5.741	0.538546	1
Biological Process	GO:0030707	ovarian follicle cell development	11	10.8086	0.539346	1
Biological Process	GO:0007350	blastoderm segmentation	4	3.75	0.541746	1
Cellular Component	GO:0022627	cytosolic small ribosomal subunit	1	0.7671	0.542246	1
Molecular Function	GO:0003774	motor activity	6	5.8307	0.542846	1
Molecular Function	GO:0015276	ligand-gated ion channel activity	3	2.7985	0.543846	1
Molecular Function	GO:0003755	peptidyl-prolyl cis-trans isomerase activity	1	0.7669	0.545145	1
Biological Process	GO:0042078	germ-line stem cell division	5	4.7384	0.546845	1
Cellular Component	GO:0005918	septate junction	5	4.7853	0.550245	1
Molecular Function	GO:0005516	calmodulin binding	6	5.832	0.550545	1
Molecular Function	GO:0004364	glutathione transferase activity	1	0.788	0.551545	1
Biological Process	GO:0007480	imaginal disc-derived leg morphogenesis	15	14.9529	0.554745	1
Cellular Component	GO:0005871	kinesin complex	3	2.8323	0.556044	1
Cellular Component	GO:0031012	extracellular matrix	8	7.9075	0.556344	1
Biological Process	GO:0042052	rhabdomere development	6	5.8651	0.556544	1
Molecular Function	GO:0004722	protein serine/threonine phosphatase activity	3	2.8333	0.558344	1
Cellular Component	GO:0005813	centrosome	6	5.941	0.559944	1
Cellular Component	GO:0005814	centriole	2	1.8263	0.561744	1
Cellular Component	GO:0005576	extracellular region	34	34.2983	0.562644	1
Biological Process	GO:0006355	regulation of transcription, DNA-templated	52	52.5225	0.563744	1
Biological Process	GO:0060439	trachea morphogenesis	4	3.8098	0.566543	1
Cellular Component	GO:0005770	late endosome	3	2.8268	0.567343	1
Molecular Function	GO:0008233	peptidase activity	2	1.8494	0.568343	1
Biological Process	GO:0010468	regulation of gene expression	6	5.8934	0.568443	1
Molecular Function	GO:0015020	glucuronosyltransferase activity	2	1.8228	0.569343	1
Biological Process	GO:0007310	oocyte dorsal/ventral axis specification	3	2.8355	0.570643	1
Biological Process	GO:0045861	negative regulation of proteolysis	1	0.807	0.571143	1
Molecular Function	GO:0046982	protein heterodimerization activity	11	11.0897	0.572443	1
Biological Process	GO:0009408	response to heat	4	3.9623	0.573443	1
Cellular Component	GO:0005875	microtubule associated complex	24	24.3869	0.574443	1
Cellular Component	GO:0005615	extracellular space	16	16.3062	0.577142	1
Biological Process	GO:0006351	transcription, DNA-templated	5	5.0106	0.577242	1
Biological Process	GO:0006629	lipid metabolic process	4	3.993	0.580942	1
Biological Process	GO:0007275	multicellular organismal development	3	2.8818	0.580942	1
Biological Process	GO:0007349	cellularization	5	5.0345	0.587641	1
Biological Process	GO:0007143	female meiotic division	3	2.9117	0.588441	1
Biological Process	GO:0009880	embryonic pattern specification	4	3.9506	0.588841	1
Cellular Component	GO:0005938	cell cortex	13	13.2643	0.589341	1
Cellular Component	GO:0005705	polytene chromosome interband	2	1.9461	0.590841	1
Biological Process	GO:0030036	actin cytoskeleton organization	9	9.1655	0.594241	1
Molecular Function	GO:0016490	structural constituent of peritrophic membrane	1	0.876	0.59514	1
Biological Process	GO:0045433	male courtship behavior, veined wing generated song production	5	4.9485	0.59734	1
Biological Process	GO:0045944	positive regulation of transcription from RNA polymerase II promoter	27	27.6424	0.60164	1
Cellular Component	GO:0016323	basolateral plasma membrane	6	6.0829	0.605439	1
Biological Process	GO:0016203	muscle attachment	7	7.1369	0.606739	1
Biological Process	GO:0007525	somatic muscle development	5	4.987	0.608039	1
Biological Process	GO:0030717	karyosome formation	3	2.9894	0.608439	1
Biological Process	GO:0009267	cellular response to starvation	3	2.9822	0.611539	1
Molecular Function	GO:0001075	RNA polymerase II core promoter sequence-specific DNA binding transcription factor activity involved in preinitiation complex assembly	1	0.8944	0.611739	1
Cellular Component	GO:0016324	apical plasma membrane	9	9.3329	0.615738	1
Biological Process	GO:0008360	regulation of cell shape	14	14.4658	0.615938	1
Cellular Component	GO:0005834	heterotrimeric G-protein complex	2	1.9588	0.616738	1
Molecular Function	GO:0000980	RNA polymerase II distal enhancer sequence-specific DNA binding	3	3.0087	0.617138	1
Molecular Function	GO:0017022	myosin binding	3	3.0626	0.619938	1
Biological Process	GO:0007015	actin filament organization	12	12.4462	0.621038	1
Biological Process	GO:0007605	sensory perception of sound	8	8.3036	0.622738	1
Biological Process	GO:0008586	imaginal disc-derived wing vein morphogenesis	11	11.312	0.622938	1
Biological Process	GO:0007474	imaginal disc-derived wing vein specification	11	11.3658	0.625337	1
Cellular Component	GO:0005730	nucleolus	3	3.1835	0.627637	1
Cellular Component	GO:0005694	chromosome	2	2.0586	0.628337	1
Biological Process	GO:0007426	tracheal outgrowth, open tracheal system	5	5.146	0.628937	1
Biological Process	GO:0006366	transcription from RNA polymerase II promoter	4	4.1245	0.629237	1
Biological Process	GO:0007619	courtship behavior	6	6.129	0.635536	1
Biological Process	GO:0000381	regulation of alternative mRNA splicing, via spliceosome	7	7.3218	0.636036	1
Molecular Function	GO:0005506	iron ion binding	6	6.4482	0.637136	1
Biological Process	GO:0008049	male courtship behavior	7	7.2971	0.638436	1
Molecular Function	GO:0000287	magnesium ion binding	3	3.2045	0.641636	1
Cellular Component	GO:0043186	P granule	3	2.9805	0.643036	1
Biological Process	GO:0042787	protein ubiquitination involved in ubiquitin-dependent protein catabolic process	2	2.1141	0.644136	1
Molecular Function	GO:0008157	protein phosphatase 1 binding	4	4.175	0.645435	1
Biological Process	GO:0016197	endosomal transport	1	1.0056	0.647435	1
Biological Process	GO:0010506	regulation of autophagy	3	3.1671	0.647735	1
Biological Process	GO:0006950	response to stress	1	1.0012	0.649335	1
Biological Process	GO:0007435	salivary gland morphogenesis	11	11.6435	0.653035	1
Biological Process	GO:0050821	protein stabilization	2	2.1008	0.653335	1
Molecular Function	GO:0042626	ATPase activity, coupled to transmembrane movement of substances	5	5.4616	0.654435	1
Biological Process	GO:0006915	apoptotic process	4	4.29	0.656434	1
Biological Process	GO:0007431	salivary gland development	5	5.3059	0.657334	1
Molecular Function	GO:0016791	phosphatase activity	1	1.0005	0.657934	1
Molecular Function	GO:0019901	protein kinase binding	3	3.1097	0.660334	1
Molecular Function	GO:0003729	mRNA binding	20	21.0189	0.664634	1
Molecular Function	GO:0005184	neuropeptide hormone activity	2	2.2068	0.668233	1
Molecular Function	GO:0008010	structural constituent of chitin-based larval cuticle	2	2.2584	0.668333	1
Biological Process	GO:0006470	protein dephosphorylation	9	9.6646	0.670033	1
Cellular Component	GO:0005856	cytoskeleton	8	8.5349	0.670333	1
Biological Process	GO:0050909	sensory perception of taste	3	3.1724	0.670533	1
Cellular Component	GO:0005743	mitochondrial inner membrane	2	2.2627	0.672033	1
Biological Process	GO:0007010	cytoskeleton organization	5	5.4067	0.672233	1
Molecular Function	GO:0000977	RNA polymerase II regulatory region sequence-specific DNA binding	4	4.3545	0.674533	1
Biological Process	GO:0006749	glutathione metabolic process	1	1.0826	0.675032	1
Cellular Component	GO:0005740	mitochondrial envelope	2	2.3054	0.677532	1
Biological Process	GO:0008039	synaptic target recognition	9	9.5012	0.678632	1
Biological Process	GO:0007157	heterophilic cell-cell adhesion	9	9.5709	0.680632	1
Biological Process	GO:0042594	response to starvation	3	3.3383	0.680932	1
Biological Process	GO:0002009	morphogenesis of an epithelium	6	6.4062	0.681232	1
Biological Process	GO:0006120	mitochondrial electron transport, NADH to ubiquinone	1	1.0175	0.684932	1
Molecular Function	GO:0005234	extracellular-glutamate-gated ion channel activity	3	3.3556	0.687731	1
Cellular Component	GO:0043190	ATP-binding cassette (ABC) transporter complex	4	4.5402	0.687731	1
Molecular Function	GO:0005515	protein binding	80	82.9373	0.690131	1
Biological Process	GO:0001745	compound eye morphogenesis	15	15.997	0.692331	1
Biological Process	GO:0009306	protein secretion	2	2.2745	0.692631	1
Biological Process	GO:0045886	negative regulation of synaptic growth at neuromuscular junction	6	6.6608	0.692731	1
Biological Process	GO:0016477	cell migration	6	6.5	0.69553	1
Molecular Function	GO:0016298	lipase activity	1	1.1598	0.69673	1
Biological Process	GO:0007517	muscle organ development	12	12.9798	0.69873	1
Cellular Component	GO:0016028	rhabdomere	3	3.3992	0.69963	1
Biological Process	GO:0007281	germ cell development	5	5.4388	0.69983	1
Molecular Function	GO:0004970	ionotropic glutamate receptor activity	2	2.2179	0.70093	1
Molecular Function	GO:0005272	sodium channel activity	1	1.1765	0.70133	1
Molecular Function	GO:0003954	NADH dehydrogenase activity	1	1.0741	0.70223	1
Molecular Function	GO:0005543	phospholipid binding	3	3.43	0.705229	1
Molecular Function	GO:0004197	cysteine-type endopeptidase activity	1	1.1525	0.707229	1
Biological Process	GO:0007455	eye-antennal disc morphogenesis	4	4.5337	0.710029	1
Biological Process	GO:0051297	centrosome organization	3	3.5537	0.710329	1
Biological Process	GO:0007219	Notch signaling pathway	6	6.6758	0.714529	1
Biological Process	GO:0048190	wing disc dorsal/ventral pattern formation	8	8.9422	0.715228	1
Cellular Component	GO:0005794	Golgi apparatus	8	9.0939	0.715828	1
Biological Process	GO:0007286	spermatid development	5	5.5376	0.716328	1
Biological Process	GO:0008283	cell proliferation	6	6.8119	0.716628	1
Biological Process	GO:0007224	smoothened signaling pathway	4	4.6265	0.718328	1
Cellular Component	GO:0000922	spindle pole	2	2.3342	0.719928	1
Molecular Function	GO:0004672	protein kinase activity	16	17.5896	0.721628	1
Biological Process	GO:0002168	instar larval development	4	4.6142	0.724428	1
Cellular Component	GO:0005747	mitochondrial respiratory chain complex I	1	1.1631	0.725027	1
Biological Process	GO:0000398	mRNA splicing, via spliceosome	10	11.3285	0.727427	1
Biological Process	GO:0007095	mitotic G2 DNA damage checkpoint	3	3.7447	0.730327	1
Biological Process	GO:0015992	proton transport	1	1.2239	0.730727	1
Biological Process	GO:0007269	neurotransmitter secretion	10	11.3162	0.734327	1
Biological Process	GO:0048477	oogenesis	32	34.3444	0.735826	1
Biological Process	GO:0001700	embryonic development via the syncytial blastoderm	7	7.9933	0.737826	1
Molecular Function	GO:0003730	mRNA 3'-UTR binding	5	5.5769	0.741326	1
Molecular Function	GO:0005044	scavenger receptor activity	2	2.4412	0.741426	1
Biological Process	GO:0006338	chromatin remodeling	2	2.4826	0.742026	1
Cellular Component	GO:0000124	SAGA complex	1	1.1499	0.743726	1
Molecular Function	GO:0003779	actin binding	19	20.8386	0.747125	1
Biological Process	GO:0008593	regulation of Notch signaling pathway	2	2.5625	0.748625	1
Molecular Function	GO:0051287	NAD binding	1	1.3569	0.752025	1
Molecular Function	GO:0008083	growth factor activity	4	4.7754	0.752725	1
Biological Process	GO:0032313	regulation of Rab GTPase activity	2	2.498	0.753425	1
Biological Process	GO:0006367	transcription initiation from RNA polymerase II promoter	2	2.6142	0.753525	1
Molecular Function	GO:0016705	oxidoreductase activity, acting on paired donors, with incorporation or reduction of molecular oxygen	2	2.6716	0.756224	1
Biological Process	GO:0007304	chorion-containing eggshell formation	3	3.5739	0.756224	1
Biological Process	GO:0007018	microtubule-based movement	6	7.1488	0.756524	1
Biological Process	GO:0007186	G-protein coupled receptor signaling pathway	19	21.2098	0.758024	1
Biological Process	GO:0006812	cation transport	7	8.1559	0.760224	1
Molecular Function	GO:0003677	DNA binding	45	48.5823	0.762224	1
Biological Process	GO:0007283	spermatogenesis	7	8.3616	0.762724	1
Cellular Component	GO:0015629	actin cytoskeleton	3	3.6302	0.764824	1
Biological Process	GO:0007405	neuroblast proliferation	2	2.5135	0.765123	1
Biological Process	GO:0050911	detection of chemical stimulus involved in sensory perception of smell	1	1.3522	0.769423	1
Biological Process	GO:0046716	muscle cell cellular homeostasis	5	5.8262	0.770023	1
Biological Process	GO:0051726	regulation of cell cycle	8	9.4069	0.770123	1
Biological Process	GO:0006974	cellular response to DNA damage stimulus	6	7.2803	0.772023	1
Biological Process	GO:0007614	short-term memory	5	5.7902	0.772223	1
Biological Process	GO:0008345	larval locomotory behavior	4	4.7657	0.774323	1
Molecular Function	GO:0046961	proton-transporting ATPase activity, rotational mechanism	1	1.4582	0.775722	1
Cellular Component	GO:0071011	precatalytic spliceosome	6	7.4027	0.776522	1
Biological Process	GO:0016339	calcium-dependent cell-cell adhesion	5	5.8598	0.778522	1
Biological Process	GO:0046843	dorsal appendage formation	6	7.1669	0.780322	1
Biological Process	GO:0042059	negative regulation of epidermal growth factor receptor signaling pathway	5	5.8789	0.781522	1
Molecular Function	GO:0001664	G-protein coupled receptor binding	2	2.5224	0.782322	1
Molecular Function	GO:0004806	triglyceride lipase activity	1	1.4601	0.782822	1
Molecular Function	GO:0005097	Rab GTPase activator activity	2	2.6746	0.782922	1
Biological Process	GO:0001709	cell fate determination	5	5.8857	0.783122	1
Biological Process	GO:0007112	male meiosis cytokinesis	1	1.4889	0.787621	1
Biological Process	GO:0015991	ATP hydrolysis coupled proton transport	1	1.4925	0.788021	1
Cellular Component	GO:0055037	recycling endosome	1	1.4654	0.788221	1
Molecular Function	GO:0003924	GTPase activity	8	9.7883	0.790421	1
Biological Process	GO:0001751	compound eye photoreceptor cell differentiation	4	4.9311	0.792621	1
Biological Process	GO:0010629	negative regulation of gene expression	6	7.3647	0.794021	1
Biological Process	GO:0007218	neuropeptide signaling pathway	6	7.4533	0.79632	1
Biological Process	GO:0007126	meiotic nuclear division	1	1.4991	0.80022	1
Molecular Function	GO:0003723	RNA binding	11	12.8296	0.80092	1
Biological Process	GO:0008582	regulation of synaptic growth at neuromuscular junction	5	6.1335	0.80192	1
Cellular Component	GO:0005887	integral component of plasma membrane	33	36.4892	0.80312	1
Molecular Function	GO:0001077	RNA polymerase II core promoter proximal region sequence-specific DNA binding transcription factor activity involved in positive regulation of transcription	8	9.5968	0.80432	1
Biological Process	GO:0051298	centrosome duplication	2	2.9541	0.805319	1
Biological Process	GO:0007005	mitochondrion organization	2	2.7466	0.805919	1
Biological Process	GO:0042981	regulation of apoptotic process	2	2.7611	0.807719	1
Biological Process	GO:0007602	phototransduction	5	6.1784	0.808619	1
Cellular Component	GO:0031982	vesicle	2	2.9305	0.809619	1
Biological Process	GO:0006606	protein import into nucleus	1	1.6116	0.812619	1
Cellular Component	GO:0005622	intracellular	10	12.1276	0.813219	1
Molecular Function	GO:0004175	endopeptidase activity	1	1.658	0.814319	1
Molecular Function	GO:0017137	Rab GTPase binding	2	2.8543	0.815318	1
Biological Process	GO:0045824	negative regulation of innate immune response	1	1.6138	0.820018	1
Biological Process	GO:0006325	chromatin organization	3	4.0676	0.831717	1
Biological Process	GO:0045165	cell fate commitment	3	4.043	0.832417	1
Biological Process	GO:0045893	positive regulation of transcription, DNA-templated	11	13.343	0.833717	1
Biological Process	GO:0035206	regulation of hemocyte proliferation	5	6.2616	0.834917	1
Biological Process	GO:0016079	synaptic vesicle exocytosis	3	4.2175	0.841916	1
Cellular Component	GO:0016020	membrane	35	39.6214	0.841916	1
Biological Process	GO:0016311	dephosphorylation	1	1.7384	0.845515	1
Cellular Component	GO:0000776	kinetochore	1	1.758	0.848315	1
Biological Process	GO:0045747	positive regulation of Notch signaling pathway	3	4.3629	0.850215	1
Biological Process	GO:0048488	synaptic vesicle endocytosis	3	4.3607	0.852215	1
Biological Process	GO:0006886	intracellular protein transport	4	5.8106	0.853515	1
Biological Process	GO:0008354	germ cell migration	4	5.6666	0.858514	1
Cellular Component	GO:0043025	neuronal cell body	6	7.8931	0.859214	1
Biological Process	GO:0009987	cellular process	5	6.7364	0.859914	1
Molecular Function	GO:0005089	Rho guanyl-nucleotide exchange factor activity	6	7.7402	0.861414	1
Biological Process	GO:0042060	wound healing	4	5.6409	0.863114	1
Cellular Component	GO:0005739	mitochondrion	8	10.8538	0.863214	1
Biological Process	GO:0055114	oxidation-reduction process	15	18.7806	0.864114	1
Biological Process	GO:0033227	dsRNA transport	1	1.8574	0.865313	1
Biological Process	GO:0051276	chromosome organization	1	1.8887	0.865813	1
Biological Process	GO:0008347	glial cell migration	6	7.918	0.869813	1
Molecular Function	GO:0008061	chitin binding	5	6.9356	0.870013	1
Biological Process	GO:0006810	transport	4	5.953	0.870013	1
Molecular Function	GO:0005085	guanyl-nucleotide exchange factor activity	4	5.4152	0.870213	1
Cellular Component	GO:0072686	mitotic spindle	1	1.8689	0.872513	1
Biological Process	GO:0048675	axon extension	7	8.4993	0.875512	1
Biological Process	GO:0005975	carbohydrate metabolic process	3	4.8186	0.876212	1
Cellular Component	GO:0005764	lysosome	1	1.9295	0.876412	1
Cellular Component	GO:0005654	nucleoplasm	2	3.2521	0.876612	1
Cellular Component	GO:0071013	catalytic step 2 spliceosome	4	5.9254	0.876612	1
Biological Process	GO:0048812	neuron projection morphogenesis	9	11.8187	0.877412	1
Molecular Function	GO:0005509	calcium ion binding	27	31.5605	0.877712	1
Molecular Function	GO:0004725	protein tyrosine phosphatase activity	5	6.7474	0.878212	1
Cellular Component	GO:0016592	mediator complex	1	1.8596	0.879612	1
Molecular Function	GO:0020037	heme binding	6	8.2856	0.879912	1
Biological Process	GO:0006030	chitin metabolic process	4	5.8639	0.880612	1
Biological Process	GO:0048813	dendrite morphogenesis	24	28.37	0.880712	1
Biological Process	GO:0007411	axon guidance	34	39.0168	0.881212	1
Biological Process	GO:0040011	locomotion	4	5.4753	0.881512	1
Cellular Component	GO:0005737	cytoplasm	79	87.0621	0.883712	1
Biological Process	GO:0007140	male meiosis	1	2.0288	0.883912	1
Cellular Component	GO:0045211	postsynaptic membrane	5	6.619	0.884212	1
Molecular Function	GO:0005201	extracellular matrix structural constituent	3	4.1748	0.884412	1
Biological Process	GO:0006897	endocytosis	3	4.7402	0.885211	1
Biological Process	GO:0008284	positive regulation of cell proliferation	4	5.8077	0.887011	1
Biological Process	GO:0042332	gravitaxis	4	5.4027	0.887211	1
Molecular Function	GO:0001104	RNA polymerase II transcription cofactor activity	1	1.8679	0.888011	1
Biological Process	GO:0007264	small GTPase mediated signal transduction	3	4.6947	0.888811	1
Cellular Component	GO:0005777	peroxisome	2	3.4662	0.889411	1
Biological Process	GO:0006457	protein folding	2	3.6292	0.889811	1
Biological Process	GO:0008286	insulin receptor signaling pathway	1	1.8979	0.890211	1
Cellular Component	GO:0031410	cytoplasmic vesicle	1	1.9612	0.891711	1
Molecular Function	GO:0001078	RNA polymerase II core promoter proximal region sequence-specific DNA binding transcription factor activity involved in negative regulation of transcription	2	3.2721	0.894611	1
Molecular Function	GO:0005524	ATP binding	57	64.8921	0.89541	1
Biological Process	GO:0007494	midgut development	5	6.9899	0.89591	1
Molecular Function	GO:0008188	neuropeptide receptor activity	6	8.5933	0.89731	1
Molecular Function	GO:0008026	ATP-dependent helicase activity	1	2.0126	0.89791	1
Molecular Function	GO:0004222	metalloendopeptidase activity	5	7.3028	0.89871	1
Biological Process	GO:0007052	mitotic spindle organization	6	8.956	0.90081	1
Molecular Function	GO:0004713	protein tyrosine kinase activity	5	7.3304	0.90141	1
Molecular Function	GO:0008227	G-protein coupled amine receptor activity	4	5.9659	0.90221	1
Biological Process	GO:0048102	autophagic cell death	4	6.1324	0.90251	1
Biological Process	GO:0007274	neuromuscular synaptic transmission	7	9.4972	0.906109	1
Biological Process	GO:0000070	mitotic sister chromatid segregation	1	1.9646	0.907309	1
Cellular Component	GO:0005578	proteinaceous extracellular matrix	7	9.2755	0.909909	1
Biological Process	GO:0030097	hemopoiesis	2	3.5414	0.910109	1
Cellular Component	GO:0005703	polytene chromosome puff	2	3.5535	0.910109	1
Biological Process	GO:0030718	germ-line stem cell maintenance	4	6.2733	0.910809	1
Biological Process	GO:0035071	salivary gland cell autophagic cell death	6	8.6739	0.911609	1
Molecular Function	GO:0016491	oxidoreductase activity	2	3.8259	0.912309	1
Molecular Function	GO:0004004	ATP-dependent RNA helicase activity	1	2.347	0.912509	1
Biological Process	GO:0007472	wing disc morphogenesis	3	4.7659	0.912909	1
Biological Process	GO:0008045	motor neuron axon guidance	13	16.3968	0.912909	1
Biological Process	GO:0040003	chitin-based cuticle development	4	6.2546	0.914209	1
Biological Process	GO:0008340	determination of adult lifespan	12	15.9991	0.916608	1
Cellular Component	GO:0045202	synapse	6	8.529	0.917108	1
Biological Process	GO:0007254	JNK cascade	3	4.8799	0.918008	1
Biological Process	GO:0006184	GTP catabolic process	3	5.2065	0.919708	1
Biological Process	GO:0007294	germarium-derived oocyte fate determination	2	3.8231	0.920808	1
Biological Process	GO:0008344	adult locomotory behavior	3	5.1166	0.921808	1
Cellular Component	GO:0030425	dendrite	5	7.2905	0.922008	1
Biological Process	GO:0051225	spindle assembly	1	2.4051	0.923008	1
Cellular Component	GO:0030529	ribonucleoprotein complex	2	3.2185	0.924708	1
Cellular Component	GO:0005819	spindle	2	3.8261	0.925907	1
Biological Process	GO:0070983	dendrite guidance	3	4.9011	0.928207	1
Cellular Component	GO:0045177	apical part of cell	4	6.5007	0.930507	1
Biological Process	GO:0019730	antimicrobial humoral response	4	6.3252	0.931407	1
Molecular Function	GO:0005215	transporter activity	6	9.2612	0.931707	1
Cellular Component	GO:0045179	apical cortex	5	7.6237	0.932007	1
Biological Process	GO:0007314	oocyte anterior/posterior axis specification	2	3.9663	0.932907	1
Cellular Component	GO:0005912	adherens junction	7	9.8498	0.933607	1
Cellular Component	GO:0042600	chorion	1	1.8781	0.935306	1
Molecular Function	GO:0004842	ubiquitin-protein transferase activity	5	8.3544	0.937306	1
Biological Process	GO:0007163	establishment or maintenance of cell polarity	4	6.3335	0.937906	1
Biological Process	GO:0007076	mitotic chromosome condensation	1	2.3501	0.938606	1
Biological Process	GO:0022008	neurogenesis	28	35.2906	0.940706	1
Molecular Function	GO:0003705	RNA polymerase II distal enhancer sequence-specific DNA binding transcription factor activity	7	10.4271	0.942206	1
Molecular Function	GO:0004930	G-protein coupled receptor activity	9	13.0506	0.942306	1
Biological Process	GO:0006413	translational initiation	1	2.5854	0.942506	1
Molecular Function	GO:0003713	transcription coactivator activity	2	3.9159	0.944006	1
Biological Process	GO:0016199	axon midline choice point recognition	5	7.5107	0.946105	1
Biological Process	GO:0045887	positive regulation of synaptic growth at neuromuscular junction	3	5.1965	0.946505	1
Biological Process	GO:0007317	regulation of pole plasm oskar mRNA localization	1	2.5893	0.949105	1
Biological Process	GO:0051124	synaptic growth at neuromuscular junction	5	7.7226	0.951105	1
Biological Process	GO:0001666	response to hypoxia	1	2.5553	0.954005	1
Molecular Function	GO:0017111	nucleoside-triphosphatase activity	1	1.8399	0.957104	1
Biological Process	GO:0008356	asymmetric cell division	3	5.4946	0.957304	1
Biological Process	GO:0007067	mitotic nuclear division	4	7.3941	0.957904	1
Molecular Function	GO:0003743	translation initiation factor activity	1	2.9588	0.961304	1
Cellular Component	GO:0043195	terminal bouton	3	5.6326	0.965303	1
Biological Process	GO:0009952	anterior/posterior pattern specification	1	2.9889	0.967103	1
Biological Process	GO:0007155	cell adhesion	18	24.1843	0.969803	1
Biological Process	GO:0007293	germarium-derived egg chamber formation	1	3.1474	0.970703	1
Molecular Function	GO:0005525	GTP binding	7	11.8202	0.971303	1
Biological Process	GO:0007268	synaptic transmission	8	12.1628	0.972803	1
Cellular Component	GO:0005925	focal adhesion	2	4.5373	0.976302	1
Biological Process	GO:0007528	neuromuscular junction development	4	7.6262	0.977602	1
Molecular Function	GO:0004386	helicase activity	1	3.5482	0.978302	1
Biological Process	GO:0007416	synapse assembly	3	6.1699	0.980602	1
Biological Process	GO:0043066	negative regulation of apoptotic process	2	5.151	0.981502	1
Molecular Function	GO:0008092	cytoskeletal protein binding	4	7.2911	0.981802	1
Biological Process	GO:0006979	response to oxidative stress	3	7.2525	0.985401	1
Biological Process	GO:0045793	positive regulation of cell size	1	3.5202	0.989401	1
Cellular Component	GO:0005795	Golgi stack	1	3.3167	0.989401	1
Cellular Component	GO:0009986	cell surface	4	8.4836	0.992501	1
Biological Process	GO:0016567	protein ubiquitination	1	4.1546	0.992701	1
Biological Process	GO:0016322	neuron remodeling	1	3.8926	0.993301	1
Molecular Function	GO:0004872	receptor activity	6	11.7896	0.994601	1
Biological Process	GO:0007520	myoblast fusion	2	5.9542	0.9984	1
Cellular Component	GO:0031594	neuromuscular junction	6	12.9735	0.9995	1
Molecular Function	GO:0004181	metallocarboxypeptidase activity	0	1.3166	1	1
Molecular Function	GO:0004402	histone acetyltransferase activity	0	1.1666	1	1
Molecular Function	GO:0004843	ubiquitin-specific protease activity	0	2.8456	1	1
Molecular Function	GO:0008080	N-acetyltransferase activity	0	0.7255	1	1
Molecular Function	GO:0008137	NADH dehydrogenase (ubiquinone) activity	0	0.5663	1	1
Molecular Function	GO:0008168	methyltransferase activity	0	1.2394	1	1
Molecular Function	GO:0008289	lipid binding	0	1.6476	1	1
Molecular Function	GO:0008527	taste receptor activity	0	1.4773	1	1
Molecular Function	GO:0008565	protein transporter activity	0	1.2808	1	1
Molecular Function	GO:0016747	transferase activity, transferring acyl groups other than amino-acyl groups	0	1.3694	1	1
Molecular Function	GO:0016772	transferase activity, transferring phosphorus-containing groups	0	1.6103	1	1
Molecular Function	GO:0051082	unfolded protein binding	0	2.5169	1	1
Biological Process	GO:0006096	glycolytic process	0	1.021	1	1
Biological Process	GO:0006260	DNA replication	0	1.9459	1	1
Biological Process	GO:0006289	nucleotide-excision repair	0	1.1814	1	1
Biological Process	GO:0006334	nucleosome assembly	0	0.7892	1	1
Biological Process	GO:0006364	rRNA processing	0	0.78	1	1
Biological Process	GO:0006396	RNA processing	0	1.0699	1	1
Biological Process	GO:0006406	mRNA export from nucleus	0	1.3704	1	1
Biological Process	GO:0007059	chromosome segregation	0	2.632	1	1
Biological Process	GO:0008298	intracellular mRNA localization	0	2.2086	1	1
Biological Process	GO:0009058	biosynthetic process	0	1.1141	1	1
Biological Process	GO:0010171	body morphogenesis	0	0.2915	1	1
Biological Process	GO:0015031	protein transport	0	2.543	1	1
Biological Process	GO:0016573	histone acetylation	0	0.8402	1	1
Biological Process	GO:0016579	protein deubiquitination	0	2.6135	1	1
Biological Process	GO:0030307	positive regulation of cell growth	0	2.9806	1	1
Biological Process	GO:0032482	Rab protein signal transduction	0	1.3389	1	1
Biological Process	GO:0035195	gene silencing by miRNA	0	0.914	1	1
Biological Process	GO:0040018	positive regulation of multicellular organism growth	0	3.5284	1	1
Biological Process	GO:0042254	ribosome biogenesis	0	0.8817	1	1
Biological Process	GO:0042384	cilium assembly	0	1.7783	1	1
Biological Process	GO:0043161	proteasome-mediated ubiquitin-dependent protein catabolic process	0	0.9002	1	1
Cellular Component	GO:0000775	chromosome, centromeric region	0	1.2439	1	1
Cellular Component	GO:0000790	nuclear chromatin	0	1.5551	1	1
Cellular Component	GO:0005643	nuclear pore	0	2.3938	1	1
Cellular Component	GO:0005686	U2 snRNP	0	0.4393	1	1
Cellular Component	GO:0005741	mitochondrial outer membrane	0	0.5999	1	1
Cellular Component	GO:0005759	mitochondrial matrix	0	2.3857	1	1
Cellular Component	GO:0005763	mitochondrial small ribosomal subunit	0	0.6211	1	1
Cellular Component	GO:0005838	proteasome regulatory particle	0	0.7117	1	1
Cellular Component	GO:0005929	cilium	0	1.015	1	1
Cellular Component	GO:0015030	Cajal body	0	0.4662	1	1

## Sheet: D
D. Variance components of organismal traits among MA and DGRP lines
Trait	Female													Male
	VMA	Vrep	Vwithin	P-value (H0: VMA = 0)	h2m	Proportion of Genes with Larger h2m	Vg	Vrep	Vwithin	P-value (H0: Vg = 0)	Vm/Vg	Proportion of Genes with Larger Vm/Vg		VMA	Vrep	Vwithin	P-value (H0: VMA = 0)	h2m	Proportion of Genes with Larger h2m	Vg	Vrep	Vwithin	P-value (H0: Vg = 0)	Vm/Vg	Proportion of Genes with Larger Vm/Vg
Abdominal bristle number	6.36114	2.10145	45.3153	2.5042e-10	0.00146213	0.091594	38.5573	0.191421	16.2169	9.80547e-170	0.00179809	0.518768		0.228128	0.304908	7.97395	0.00481075	0.000300325	0.785644	12.3638	0.0564178	7.24423	2.04881e-136	0.000201099	0.906834
Sternopleural bristle number	0.18592	0.0335858	1.8177	6.96827e-07	0.00109455	0.171425	5.43911	0.0321036	3.09816	3.65987e-139	0.000372547	0.868358		0.208085	0.0952904	1.69672	1.8175e-09	0.00126556	0.272493	1.33209	0.0212738	0.791188	1.14761e-135	0.00170251	0.510079
Waking activity	0.0409446	N/A	0.164925	1.30475e-97	0.00270578	0.0198255	0.0990094	#N/A	0.0742557	1.10061e-85	0.00450717	0.214909		0.0625395	N/A	0.236252	6.45152e-104	0.0028851	0.0322026	0.118268	N/A	0.163572	1.4736e-52	0.00576327	0.146018
Day sleep duration	5536.66	N/A	26258.5	4.96046e-83	0.00229806	0.0305313	21947	#N/A	14187.8	1.02055e-101	0.00274951	0.36664		3001.68	N/A	12837.2	5.03179e-92	0.00254845	0.0517453	9800.06	N/A	8861.88	5.3032e-75	0.00333825	0.280236
Day sleep bout number	22.1327	N/A	116.685	1.2424e-74	0.00206729	0.0407084	46.026	#N/A	52.2905	4.76869e-63	0.005241	0.17843		3.60431	N/A	31.1243	1.32266e-44	0.00126213	0.273722	18.461	N/A	31.0223	3.72091e-44	0.00212789	0.432522
Night sleep duration	956.884	N/A	11683.8	1.31962e-30	0.000892603	0.253238	20176.7	#N/A	13926.8	4.93266e-105	0.000516884	0.831483		1441.01	N/A	13067.5	2.52552e-42	0.00120187	0.292527	24335	N/A	14888.9	1.94412e-105	0.000645383	0.785152
Night sleep bout number	5.45497	N/A	46.6372	4.3877e-45	0.0012748	0.125033	28.5267	#N/A	33.3499	2.73205e-67	0.00208412	0.468147		3.62524	N/A	30.745	1.78583e-45	0.00128513	0.267576	24.1832	N/A	25.7447	5.79784e-66	0.00163382	0.522616

## Sheet: E
E. Variance components of gene expression traits among MA and DGRP lines
FlyBase ID	Gene Symbol	Gene Biotype	Gene Position	Female											Male
				VMA	Vwithin	P-value (H0: VMA = 0)	FDR (H0: VMA = 0)	h2m	Vg	Vwithin	P-value (H0: Vg = 0)	FDR (H0: Vg = 0)	Vm/Vg		VMA	Vwithin	P value (H0: VMA = 0)	FDR (H0: VMA = 0)	h2m	Vg	Vwithin	P value (H0: Vg = 0)	FDR (H0: Vg = 0)	Vm/Vg
FBgn0000008	7SLRNA:CR32864	ncRNA	3R:2648219-2648518	1.114E-01	4.020E-02	2.403E-05	1.990E-03	3.084E-03	9.982E-02	5.705E+00	1.448E-03	2.052E-03	1.242E-02		Not expressed in males	-	-	-	-	-	-	-	-	-
FBgn0000015	a	protein_coding	2R:18024472-18060339	3.818E-02	9.626E-02	9.997E-02	1.621E-01	4.415E-04	6.088E-02	4.378E+00	1.923E-03	2.675E-03	6.982E-03		1.307E-02	1.102E-02	3.490E-03	1.349E-02	1.321E-03	4.167E-02	6.371E+00	2.403E-02	2.702E-02	3.493E-03
FBgn0000017	abd-A	protein_coding	3R:12632935-12655771	9.069E-22	6.906E-02	5.411E-01	5.702E-01	1.462E-23	5.089E-02	4.099E+00	6.805E-04	1.017E-03	1.984E-22		Not expressed in males	-	-	-	-	-	-	-	-	-
FBgn0000018	Abd-B	protein_coding	3R:12752931-12797958	2.693E-03	3.016E-02	3.539E-01	4.000E-01	9.937E-05	1.274E-01	7.204E+00	2.260E-06	5.415E-06	2.352E-04		4.993E-03	1.639E-02	1.526E-01	1.977E-01	3.390E-04	3.670E-02	4.748E+00	2.332E-06	4.867E-06	1.514E-03
FBgn0000032	Abl	protein_coding	3L:16608965-16640982	4.484E-03	7.245E-03	3.508E-02	8.991E-02	6.890E-04	7.523E-02	9.838E+00	2.165E-12	2.347E-11	6.635E-04		1.020E-03	7.757E-03	3.062E-01	3.479E-01	1.464E-04	1.502E-02	8.595E+00	3.498E-03	4.413E-03	7.559E-04
FBgn0000042	abo	protein_coding	2L:10973442-10975293	1.677E-03	4.681E-03	9.953E-02	1.616E-01	3.989E-04	3.034E-03	1.291E+01	2.197E-02	2.612E-02	6.155E-03		8.072E-03	3.434E-03	7.686E-05	1.629E-03	2.616E-03	4.264E-03	1.271E+01	1.418E-03	1.887E-03	2.107E-02
FBgn0000043	ac	protein_coding	X:264063-264980	6.399E-03	4.398E-03	1.286E-03	1.829E-02	1.620E-03	9.236E-03	1.185E+01	1.460E-05	2.951E-05	7.712E-03		2.326E-03	1.374E-03	5.724E-04	4.700E-03	1.885E-03	9.127E-03	1.151E+01	5.737E-04	8.127E-04	2.836E-03
FBgn0000044	Ace	protein_coding	3R:9048672-9085239	1.110E-02	1.959E-02	4.293E-02	1.000E-01	6.307E-04	1.087E-02	1.353E+01	2.634E-07	7.670E-07	1.137E-02		1.702E-04	3.848E-03	4.609E-01	4.927E-01	4.923E-05	9.564E-03	1.360E+01	6.698E-08	1.873E-07	1.981E-04
FBgn0000045	acj6	protein_coding	X:15244271-15273097	4.609E-02	5.515E-02	1.291E-02	5.614E-02	9.301E-04	3.379E-01	1.198E+01	1.389E-13	2.097E-12	1.518E-03		5.035E-03	9.972E-03	5.227E-02	8.736E-02	5.620E-04	8.685E-02	1.312E+01	2.639E-13	2.673E-12	6.453E-04
FBgn0000046	Acph-1	protein_coding	3R:25816865-25819133	4.402E-02	6.050E-02	2.106E-02	7.069E-02	8.100E-04	7.162E-02	1.193E+01	6.660E-12	6.085E-11	6.842E-03		2.777E-03	1.361E-02	2.297E-01	2.747E-01	2.271E-04	2.268E-02	1.234E+01	4.931E-09	1.732E-08	1.363E-03
FBgn0000047	nAChRalpha1	protein_coding	3R:20219617-20282879	2.539E-01	1.823E-01	1.603E-03	2.025E-02	1.550E-03	6.489E-01	1.238E+01	3.359E-15	7.892E-14	4.356E-03		5.168E-02	2.389E-02	1.278E-04	2.096E-03	2.407E-03	5.283E-01	1.264E+01	6.652E-18	2.653E-16	1.089E-03
FBgn0000052	mAChR-A	protein_coding	2R:20266152-20277817	2.257E-02	2.349E-02	8.509E-03	4.582E-02	1.070E-03	5.823E-02	9.016E+00	4.881E-05	8.949E-05	4.315E-03		1.826E-01	1.043E-01	4.669E-04	4.203E-03	1.948E-03	5.392E-01	7.611E+00	1.305E-07	3.439E-07	3.770E-03
FBgn0000054	nAChRbeta1	protein_coding	3L:4429348-4435993	4.119E-03	1.079E-02	8.562E-02	1.469E-01	4.250E-04	2.177E-02	9.886E+00	1.339E-05	2.720E-05	2.106E-03		1.231E-03	7.269E-03	2.575E-01	3.013E-01	1.886E-04	9.863E-03	8.938E+00	3.977E-03	4.979E-03	1.390E-03
FBgn0000055	nAChRalpha2	protein_coding	3R:20311149-20316869	1.774E-03	1.374E-03	2.299E-03	2.391E-02	1.436E-03	2.730E-02	1.366E+01	4.944E-09	2.118E-08	7.231E-04		3.717E-03	3.881E-03	8.111E-03	2.383E-02	1.066E-03	1.490E-02	1.412E+01	1.369E-09	5.486E-09	2.778E-03
FBgn0000057	Act5C	protein_coding	X:5794893-5799432	0.000E+00	2.108E-02	5.898E-01	6.142E-01	0.000E+00	1.091E-02	7.385E+00	1.452E-01	1.553E-01	0.000E+00		1.033E-03	2.033E-02	4.410E-01	4.741E-01	5.654E-05	1.983E-02	7.987E+00	2.213E-03	2.869E-03	5.797E-04
FBgn0000063	Act42A	protein_coding	2R:1901414-1903194	4.519E-02	7.863E-02	4.144E-02	9.796E-02	6.397E-04	2.105E-01	5.022E+00	6.315E-07	1.676E-06	2.390E-03		Not expressed in males	-	-	-	-	-	-	-	-	-
FBgn0000071	Act57B	protein_coding	2R:16831525-16833936	1.425E-01	5.199E-01	1.735E-01	2.341E-01	3.050E-04	4.577E-01	3.720E+00	7.706E-05	1.356E-04	3.465E-03		Not expressed in males	-	-	-	-	-	-	-	-	-
FBgn0000075	Act79B	protein_coding	3L:21978309-21980290	4.970E-02	1.449E-01	1.293E-01	1.915E-01	3.819E-04	5.438E-02	4.362E+00	1.186E-02	1.462E-02	1.017E-02		Not expressed in males	-	-	-	-	-	-	-	-	-
FBgn0000077	Act87E	protein_coding	3R:9251704-9254097	1.462E-02	2.486E-02	3.752E-02	9.326E-02	6.546E-04	5.070E-02	5.657E+00	1.933E-07	5.815E-07	3.210E-03		Not expressed in males	-	-	-	-	-	-	-	-	-
FBgn0000083	Act88F	protein_coding	3R:11265690-11267899	2.599E-03	5.007E-03	5.191E-02	1.108E-01	5.779E-04	1.239E-02	1.137E+01	4.660E-05	8.590E-05	2.336E-03		2.728E-03	4.506E-03	3.256E-02	6.202E-02	6.739E-04	4.403E-02	1.164E+01	4.950E-10	2.220E-09	6.896E-04
FBgn0000099	ade2	protein_coding	2L:6041180-6046050	4.841E-02	5.980E-02	1.616E-02	6.261E-02	9.010E-04	2.165E-01	5.339E+00	5.284E-07	1.431E-06	2.488E-03		1.272E-02	1.064E-02	3.315E-03	1.308E-02	1.330E-03	1.866E-01	6.619E+00	1.986E-08	6.185E-08	7.584E-04
FBgn0000100	ade3	protein_coding	2L:7014622-7023898	7.555E-04	9.386E-04	1.577E-02	6.179E-02	8.960E-04	5.415E-04	1.378E+01	1.232E-01	1.330E-01	1.553E-02		1.258E-03	3.688E-03	1.301E-01	1.749E-01	3.797E-04	1.866E-03	1.325E+01	3.541E-02	3.904E-02	7.504E-03
FBgn0000108	Adf1	protein_coding	2R:2549769-2555590	2.648E-02	6.843E-02	9.528E-02	1.570E-01	4.308E-04	1.180E-01	7.249E+00	6.194E-02	6.941E-02	2.499E-03		2.121E-03	1.302E-02	2.828E-01	3.256E-01	1.813E-04	1.905E-02	8.689E+00	1.884E-01	1.941E-01	1.239E-03
FBgn0000109	Adh	protein_coding	2L:14615551-14618902	9.364E-03	1.456E-02	3.346E-02	8.835E-02	7.160E-04	5.370E-02	8.690E+00	1.442E-04	2.425E-04	1.941E-03		2.125E-02	4.308E-02	6.484E-02	1.021E-01	5.492E-04	1.021E-01	7.562E+00	8.941E-06	1.682E-05	2.318E-03
FBgn0000114	Adhr	protein_coding	2L:14615551-14618902	1.259E-02	1.278E-02	7.322E-03	4.308E-02	1.096E-03	5.441E-02	1.156E+01	6.843E-03	8.759E-03	2.575E-03		5.078E-03	4.031E-03	2.595E-03	1.128E-02	1.402E-03	2.344E-02	1.033E+01	4.662E-03	5.771E-03	2.411E-03
FBgn0000115	adp	protein_coding	2R:14039208-14041565	2.809E-03	4.700E-03	3.852E-02	9.459E-02	6.653E-04	7.315E-03	9.585E+00	3.241E-02	3.769E-02	4.275E-03		8.103E-03	6.252E-03	2.281E-03	1.038E-02	1.443E-03	1.757E-02	9.159E+00	4.028E-03	5.041E-03	5.135E-03
FBgn0000116	al	protein_coding	2L:378111-387439	6.324E-04	1.176E-02	4.003E-01	4.421E-01	5.988E-05	7.690E-03	1.295E+01	8.467E-03	1.070E-02	9.155E-04		9.568E-04	1.143E-03	1.412E-02	3.420E-02	9.321E-04	2.740E-03	1.345E+01	5.378E-02	5.822E-02	3.887E-03
FBgn0000117	ald	protein_coding	3R:13496992-13499550	2.009E-03	2.607E-03	1.919E-02	6.773E-02	8.578E-04	4.716E-03	1.087E+01	1.783E-01	1.889E-01	4.742E-03		3.451E-03	3.046E-03	4.147E-03	1.516E-02	1.261E-03	9.209E-03	1.013E+01	4.876E-02	5.307E-02	4.172E-03
FBgn0000119	Ald	protein_coding	3R:22079790-22087313	3.617E-03	2.407E-02	2.345E-01	2.914E-01	1.673E-04	3.611E-02	7.201E+00	4.115E-03	5.447E-03	1.115E-03		1.406E-02	1.877E-02	1.889E-02	4.223E-02	8.337E-04	1.004E-01	5.822E+00	1.432E-04	2.234E-04	1.558E-03
FBgn0000120	Ama	protein_coding	3R:2588314-2590983	6.192E-03	9.019E-03	2.681E-02	7.906E-02	7.642E-04	3.369E-02	1.291E+01	3.799E-09	1.667E-08	2.046E-03		1.615E-03	1.224E-03	2.071E-03	9.744E-03	1.469E-03	1.561E-02	1.337E+01	6.159E-10	2.691E-09	1.152E-03
FBgn0000121	amd	protein_coding	2L:19110153-19114110	7.997E-03	4.287E-03	3.200E-04	7.990E-03	2.077E-03	1.144E-02	1.314E+01	2.107E-04	3.419E-04	7.778E-03		1.162E-03	9.662E-04	3.243E-03	1.290E-02	1.338E-03	5.686E-03	1.356E+01	2.440E-04	3.659E-04	2.274E-03
FBgn0000139	amx	protein_coding	X:9139947-9141369	1.536E-03	1.002E-02	2.979E-01	3.501E-01	1.707E-04	5.210E-02	8.957E+00	1.366E-10	8.664E-10	3.281E-04		4.004E-03	3.323E-02	3.405E-01	3.800E-01	1.341E-04	8.539E-02	7.806E+00	9.975E-12	6.792E-11	5.220E-04
FBgn0000140	Amy-d	protein_coding	2R:13012268-13013874	3.061E-02	4.998E-02	3.282E-02	8.763E-02	6.817E-04	1.128E-01	9.240E+00	9.540E-06	2.001E-05	3.021E-03		3.503E-02	1.163E-02	1.370E-05	6.833E-04	3.352E-03	7.688E-02	5.578E+00	1.215E-05	2.239E-05	5.071E-03
FBgn0000146	Amy-p	protein_coding	2R:13006140-13007808	2.035E-02	5.561E-03	3.002E-06	5.679E-04	4.073E-03	6.270E-02	9.809E+00	2.190E-09	1.007E-08	3.613E-03		5.104E-03	1.611E-02	1.348E-01	1.795E-01	3.527E-04	5.387E-02	3.987E+00	3.419E-05	5.847E-05	1.055E-03
FBgn0000147	AnxB9	protein_coding	3R:16890962-16896639	2.020E-02	4.377E-02	6.952E-02	1.303E-01	5.137E-04	1.057E-01	7.985E+00	1.041E-11	8.973E-11	2.127E-03		6.263E-03	1.035E-02	3.623E-02	6.700E-02	6.739E-04	6.041E-02	6.411E+00	1.334E-09	5.366E-09	1.154E-03
FBgn0000150	AnxB10	protein_coding	X:20065477-20067547	2.551E-20	1.964E-03	6.450E-01	6.657E-01	1.446E-20	3.481E-03	1.348E+01	2.614E-05	5.032E-05	8.159E-20		1.250E-03	3.161E-03	9.596E-02	1.373E-01	4.403E-04	7.868E-03	1.290E+01	4.383E-08	1.273E-07	1.769E-03
FBgn0000152	CG2650	protein_coding	X:2586764-2587919	3.365E-02	4.548E-02	2.185E-02	7.187E-02	8.235E-04	7.493E-02	4.583E+00	8.721E-06	1.846E-05	4.998E-03		Not expressed in males	-	-	-	-	-	-	-	-	-
FBgn0000153	Anp	protein_coding	3R:26035669-26036104	5.724E-02	1.677E-01	1.208E-01	1.825E-01	3.801E-04	3.825E-01	8.708E+00	4.556E-10	2.484E-09	1.666E-03		2.918E-02	3.387E-02	1.300E-02	3.229E-02	9.591E-04	1.935E-01	1.023E+01	4.774E-09	1.681E-08	1.679E-03
FBgn0000158	aop	protein_coding	2L:2156483-2178754	7.402E-02	5.152E-02	1.352E-03	1.874E-02	1.599E-03	9.882E-01	6.613E+00	3.573E-18	2.048E-16	8.337E-04		Not expressed in males	-	-	-	-	-	-	-	-	-
FBgn0000163	ap	protein_coding	2R:1593706-1615030	1.577E-02	4.178E-02	8.722E-02	1.485E-01	4.203E-04	8.361E-02	6.289E+00	1.123E-01	1.220E-01	2.100E-03		4.003E-02	2.845E-02	1.510E-03	8.024E-03	1.566E-03	1.272E-01	5.396E+00	1.564E-02	1.803E-02	3.504E-03
FBgn0000166	RpLP0	protein_coding	3L:22068966-22070587	2.030E-02	3.081E-02	2.691E-02	7.921E-02	7.336E-04	1.365E-01	9.831E+00	1.319E-10	8.433E-10	1.655E-03		Not expressed in males	-	-	-	-	-	-	-	-	-
FBgn0000180	Appl	protein_coding	X:424533-473077	4.166E-17	1.478E-01	7.620E-01	7.725E-01	3.138E-19	2.081E-01	3.809E+00	4.793E-03	6.283E-03	2.229E-18		Not expressed in males	-	-	-	-	-	-	-	-	-
FBgn0000206	Aprt	protein_coding	3L:1883794-1885019	2.926E-02	6.792E-02	6.463E-02	1.246E-01	4.795E-04	1.158E-01	5.774E+00	5.181E-05	9.441E-05	2.813E-03		4.208E-02	5.406E-02	1.852E-02	4.165E-02	8.665E-04	1.097E-01	6.797E+00	1.371E-07	3.595E-07	4.271E-03
FBgn0000212	aret	protein_coding	2L:12175003-12313438	7.085E-03	1.255E-02	4.032E-02	9.661E-02	6.285E-04	1.691E-02	9.801E+00	1.368E-03	1.950E-03	4.665E-03		2.583E-03	1.113E-02	1.895E-01	2.355E-01	2.583E-04	2.024E-02	8.470E+00	2.546E-03	3.275E-03	1.420E-03
FBgn0000221	Arl1	protein_coding	3L:15976234-15977462	1.175E-02	1.792E-02	3.143E-02	8.579E-02	7.298E-04	8.755E-03	6.072E+00	5.652E-03	7.332E-03	1.494E-02		0.000E+00	7.871E-03	8.922E-01	8.960E-01	0.000E+00	1.180E-02	5.255E+00	2.107E-03	2.739E-03	0.000E+00
FBgn0000229	Argk	protein_coding	3L:9041880-9059127	8.227E-03	2.309E-02	1.069E-01	1.690E-01	3.966E-04	3.795E-02	8.838E+00	2.638E-06	6.216E-06	2.413E-03		2.695E-03	7.797E-03	1.236E-01	1.677E-01	3.848E-04	8.192E-03	9.328E+00	3.907E-04	5.682E-04	3.662E-03
FBgn0000239	arm	protein_coding	X:1785433-1794679	1.047E-02	8.246E-03	2.368E-03	2.421E-02	1.414E-03	8.664E-03	8.966E+00	3.892E-03	5.169E-03	1.345E-02		1.785E-19	5.558E-03	5.620E-01	5.868E-01	3.575E-20	5.776E-03	8.123E+00	2.506E-02	2.812E-02	3.440E-19
FBgn0000244	arr	protein_coding	2R:9341144-9370734	7.478E-03	6.516E-02	2.866E-01	3.401E-01	1.277E-04	8.046E-02	8.160E+00	1.365E-07	4.224E-07	1.034E-03		1.476E-04	9.457E-03	4.838E-01	5.143E-01	1.737E-05	3.823E-02	8.580E+00	1.015E-06	2.244E-06	4.297E-05
FBgn0000246	Arr1	protein_coding	2L:18078268-18081307	6.376E-02	5.366E-02	3.168E-03	2.816E-02	1.323E-03	1.453E+00	7.117E+00	1.008E-14	2.112E-13	4.885E-04		Not expressed in males	-	-	-	-	-	-	-	-	-
FBgn0000247	Arr2	protein_coding	3L:8640360-8642036	4.893E-03	9.338E-03	5.080E-02	1.099E-01	5.833E-04	2.345E-21	8.190E+00	6.119E-01	6.182E-01	2.323E+16		3.294E-03	8.556E-03	9.612E-02	1.374E-01	4.286E-04	1.843E-02	7.420E+00	1.783E-01	1.840E-01	1.990E-03
FBgn0000251	ase	protein_coding	X:354779-357209	6.121E-03	9.390E-03	2.675E-02	7.892E-02	7.256E-04	1.814E-02	1.079E+01	5.628E-10	3.001E-09	3.756E-03		5.359E-03	4.181E-03	2.374E-03	1.063E-02	1.427E-03	2.343E-02	9.073E+00	2.635E-06	5.420E-06	2.546E-03
FBgn0000256	ash2	protein_coding	3R:20475846-20479098	1.612E-02	1.497E-02	4.894E-03	3.513E-02	1.199E-03	5.607E-02	8.006E+00	1.945E-03	2.703E-03	3.199E-03		4.520E-03	3.984E-03	3.849E-03	1.439E-02	1.263E-03	1.820E-02	9.576E+00	7.988E-06	1.516E-05	2.764E-03
FBgn0000257	asp	protein_coding	3R:20579570-20586235	1.161E-02	1.214E-02	8.752E-03	4.654E-02	1.065E-03	1.623E-01	5.349E+00	3.267E-06	7.569E-06	7.961E-04		3.645E-03	1.891E-02	2.506E-01	2.944E-01	2.145E-04	4.366E-02	4.620E+00	4.328E-04	6.248E-04	9.293E-04
FBgn0000259	aub	protein_coding	2L:10997818-11001476	1.057E-02	2.047E-02	5.129E-02	1.102E-01	5.747E-04	2.828E-02	1.112E+01	9.663E-05	1.673E-04	4.161E-03		3.437E-03	1.254E-02	1.274E-01	1.718E-01	3.051E-04	2.115E-02	9.712E+00	4.385E-03	5.454E-03	1.809E-03
FBgn0000261	aur	protein_coding	3R:7788845-7790548	3.249E-02	2.250E-02	1.314E-03	1.851E-02	1.607E-03	4.621E-02	1.201E+01	2.131E-08	7.852E-08	7.827E-03		3.859E-03	5.189E-03	1.596E-02	3.722E-02	8.277E-04	5.823E-02	1.238E+01	1.582E-09	6.228E-09	7.376E-04
FBgn0000273	awd	protein_coding	3R:27570893-27571799	4.564E-02	6.043E-02	1.963E-02	6.846E-02	8.408E-04	1.026E-01	7.981E+00	5.494E-02	6.197E-02	4.953E-03		3.314E-02	9.213E-02	1.175E-01	1.609E-01	4.004E-04	3.178E-01	7.593E+00	4.663E-02	5.084E-02	1.161E-03
FBgn0000278	Axs	protein_coding	X:16574121-16577928	7.360E-02	6.598E-02	4.438E-03	3.344E-02	1.242E-03	4.482E-02	4.041E+00	5.695E-02	6.411E-02	1.828E-02		Not expressed in males	-	-	-	-	-	-	-	-	-
FBgn0000283	b	protein_coding	2L:13821247-13823979	5.306E-03	1.082E-02	5.331E-02	1.122E-01	5.460E-04	2.878E-02	1.057E+01	1.476E-06	3.648E-06	2.052E-03		3.127E-03	4.410E-03	2.277E-02	4.862E-02	7.894E-04	1.064E-02	8.169E+00	6.364E-03	7.736E-03	3.272E-03
FBgn0000289	Dll	protein_coding	2R:20702344-20723190	2.390E-03	2.573E-02	2.984E-01	3.506E-01	1.034E-04	5.066E-02	1.101E+01	3.243E-05	6.136E-05	5.251E-04		1.337E-02	2.057E-02	3.032E-02	5.892E-02	7.232E-04	5.305E-02	8.743E+00	3.121E-01	3.167E-01	2.805E-03
FBgn0000299	bam	protein_coding	3R:21068760-21070779	9.456E-03	4.620E-02	2.087E-01	2.673E-01	2.278E-04	6.362E-02	9.827E+00	2.353E-08	8.585E-08	1.654E-03		2.577E-02	2.194E-02	3.655E-03	1.393E-02	1.308E-03	8.462E-02	9.243E+00	2.015E-07	5.096E-07	3.390E-03
FBgn0000308	baz	protein_coding	X:17054038-17094738	2.578E-04	2.113E-03	2.885E-01	3.417E-01	1.358E-04	3.770E-03	1.119E+01	9.536E-02	1.045E-01	7.612E-04		1.241E-03	2.247E-03	5.016E-02	8.513E-02	6.146E-04	2.606E-02	1.094E+01	3.895E-04	5.667E-04	5.300E-04
FBgn0000313	bcd	protein_coding	3R:2581563-2585188	5.011E-02	3.468E-02	1.322E-03	1.856E-02	1.609E-03	1.307E-01	9.904E+00	4.314E-13	5.736E-12	4.267E-03		9.674E-03	5.697E-03	5.590E-04	4.669E-03	1.890E-03	7.370E-02	1.059E+01	5.182E-14	6.368E-13	1.461E-03
FBgn0000316	ben	protein_coding	X:13890377-13893838	2.109E-03	6.630E-03	1.267E-01	1.890E-01	3.540E-04	2.511E-02	9.343E+00	6.765E-08	2.238E-07	9.350E-04		1.594E-02	1.657E-02	8.390E-03	2.437E-02	1.071E-03	8.750E-03	6.063E+00	7.244E-03	8.721E-03	2.028E-02
FBgn0000317	bi	protein_coding	X:4306888-4379680	8.163E-03	1.705E-02	5.613E-02	1.150E-01	5.328E-04	2.401E-02	9.234E+00	1.298E-04	2.199E-04	3.784E-03		4.142E-03	1.196E-02	1.182E-01	1.617E-01	3.855E-04	2.207E-02	8.195E+00	3.497E-03	4.413E-03	2.089E-03
FBgn0000318	bib	protein_coding	2L:9984644-9995538	2.539E-03	2.688E-03	8.854E-03	4.677E-02	1.051E-03	5.650E-03	1.131E+01	3.200E-03	4.308E-03	5.002E-03		4.353E-17	4.084E-03	5.925E-01	6.150E-01	1.186E-17	2.313E-02	1.168E+01	7.563E-07	1.716E-06	2.095E-17
FBgn0000319	bic	protein_coding	2R:8757753-8759299	5.500E-03	2.289E-03	6.503E-05	3.196E-03	2.675E-03	7.331E-03	1.139E+01	3.273E-03	4.402E-03	8.351E-03		2.821E-03	1.855E-03	1.017E-03	6.424E-03	1.693E-03	1.501E-02	1.113E+01	1.112E-03	1.501E-03	2.092E-03
FBgn0000320	BicC	protein_coding	2L:16042046-16048757	2.489E-02	3.696E-02	2.933E-02	8.203E-02	7.494E-04	1.450E-01	6.738E+00	2.740E-06	6.437E-06	1.911E-03		1.172E-02	3.038E-02	6.905E-02	1.072E-01	4.294E-04	6.230E-02	4.945E+00	1.301E-03	1.740E-03	2.094E-03
FBgn0000326	BicD	protein_coding	2L:17459604-17473215	2.298E-03	1.286E-02	2.435E-01	2.994E-01	1.989E-04	4.835E-02	6.381E+00	1.927E-03	2.680E-03	5.290E-04		5.558E-03	1.317E-02	8.291E-02	1.232E-01	4.698E-04	1.164E-01	5.766E+00	1.550E-05	2.803E-05	5.317E-04
FBgn0000330	boss	protein_coding	3R:21787715-21792670	0.000E+00	3.290E-02	5.325E-01	5.629E-01	0.000E+00	6.813E-02	6.796E+00	2.261E-04	3.653E-04	0.000E+00		6.094E-03	1.334E-02	7.096E-02	1.096E-01	5.086E-04	2.616E-02	5.099E+00	1.104E-02	1.298E-02	2.593E-03
FBgn0000339	br	protein_coding	X:1469164-1558902	1.647E-03	3.877E-03	7.098E-02	1.318E-01	4.728E-04	1.147E-02	9.512E+00	1.801E-03	2.514E-03	1.598E-03		6.660E-04	3.514E-03	2.325E-01	2.773E-01	2.109E-04	1.459E-02	9.461E+00	4.751E-03	5.874E-03	5.080E-04
FBgn0000346	brm	protein_coding	3L:15963181-15975969	4.717E-02	6.619E-02	2.311E-02	7.355E-02	7.932E-04	1.714E-01	8.783E+00	4.498E-10	2.453E-09	3.062E-03		4.016E-03	9.489E-03	7.938E-02	1.192E-01	4.711E-04	1.992E-02	1.003E+01	6.512E-07	1.498E-06	2.244E-03
FBgn0000351	Brd	protein_coding	3L:14965766-14966298	2.077E-02	5.302E-02	9.329E-02	1.550E-01	4.361E-04	2.835E-01	7.645E+00	2.443E-13	3.494E-12	8.157E-04		Not expressed in males	-	-	-	-	-	-	-	-	-
FBgn0000352	brn	protein_coding	X:3998374-3999824	8.391E-03	2.463E-02	1.172E-01	1.793E-01	3.791E-04	5.135E-02	8.960E+00	3.906E-04	6.076E-04	1.819E-03		5.185E-02	2.258E-02	8.678E-05	1.718E-03	2.556E-03	2.321E-02	4.961E+00	9.002E-02	9.542E-02	2.487E-02
FBgn0000355	Bsg25A	protein_coding	2L:4683051-4684461	2.565E-01	4.219E-01	3.444E-02	8.919E-02	6.766E-04	5.461E-02	1.332E+01	8.541E-06	1.810E-05	5.227E-02		3.177E-02	2.460E-02	2.342E-03	1.054E-02	1.438E-03	1.055E-01	4.133E+00	4.329E-08	1.259E-07	3.353E-03
FBgn0000356	Bsg25D	protein_coding	2L:5271727-5278548	2.004E-01	3.855E-01	5.366E-02	1.125E-01	5.785E-04	1.700E-01	1.280E+01	1.753E-05	3.482E-05	1.312E-02		Not expressed in males	-	-	-	-	-	-	-	-	-
FBgn0000357	bsk	protein_coding	2L:10247501-10250501	6.101E-01	1.803E+00	1.267E-01	1.890E-01	3.765E-04	1.628E-01	1.263E+01	1.036E-04	1.784E-04	4.170E-02		Not expressed in males	-	-	-	-	-	-	-	-	-
FBgn0000358	btd	protein_coding	X:9588218-9591591	3.902E-01	3.259E-01	3.172E-03	2.817E-02	1.333E-03	1.701E-01	1.244E+01	3.242E-04	5.106E-04	2.553E-02		Not expressed in males	-	-	-	-	-	-	-	-	-
FBgn0000359	bur	protein_coding	2L:21174181-21179683	8.626E-02	1.129E-01	1.603E-02	6.241E-02	8.504E-04	8.534E-02	1.292E+01	8.634E-04	1.270E-03	1.125E-02		Not expressed in males	-	-	-	-	-	-	-	-	-
FBgn0000360	bw	protein_coding	2R:19415327-19426022	1.360E-01	1.267E-01	4.957E-03	3.525E-02	1.195E-03	9.563E-02	1.324E+01	1.292E-03	1.849E-03	1.583E-02		Not expressed in males	-	-	-	-	-	-	-	-	-
FBgn0000370	by	protein_coding	3R:5353959-5358733	1.806E-03	2.008E-03	1.104E-02	5.233E-02	1.001E-03	1.112E-03	1.267E+01	1.822E-01	1.927E-01	1.809E-02		2.177E-03	1.273E-03	5.537E-04	4.647E-03	1.903E-03	1.169E-02	1.279E+01	1.109E-05	2.057E-05	2.074E-03
FBgn0000376	c(3)G	protein_coding	3R:11615194-11618301	7.844E-02	8.094E-02	8.311E-03	4.540E-02	1.079E-03	6.668E-02	9.203E+00	5.995E-03	7.740E-03	1.309E-02		Not expressed in males	-	-	-	-	-	-	-	-	-
FBgn0000377	ca	protein_coding	3R:25632532-25640769	1.638E-03	2.422E-02	4.133E-01	4.537E-01	7.529E-05	7.215E-21	8.290E+00	6.581E-01	6.639E-01	2.527E+15		1.016E-02	4.582E-02	1.938E-01	2.396E-01	2.468E-04	4.161E-02	6.017E+00	8.433E-03	1.006E-02	2.717E-03
FBgn0000382	cact	protein_coding	2L:16313035-16326207	2.779E-03	1.714E-02	2.614E-01	3.155E-01	1.805E-04	8.066E-03	8.795E+00	1.586E-01	1.690E-01	3.835E-03		1.178E-04	1.961E-02	4.427E-01	4.756E-01	6.687E-06	2.077E-02	8.426E+00	8.045E-03	9.625E-03	6.312E-05
FBgn0000384	cad	protein_coding	2L:20770730-20783135	3.086E-02	3.123E-02	6.874E-03	4.219E-02	1.100E-03	4.397E-02	9.324E+00	8.848E-08	2.858E-07	7.812E-03		1.880E-02	1.336E-02	1.508E-03	8.024E-03	1.567E-03	2.171E-03	6.011E+00	3.222E-01	3.267E-01	9.636E-02
FBgn0000392	Cam	protein_coding	2R:8146902-8166314	5.388E-03	1.902E-02	1.067E-01	1.688E-01	3.153E-04	4.473E-02	1.054E+01	4.973E-06	1.107E-05	1.341E-03		1.742E-02	1.233E-02	1.487E-03	7.963E-03	1.572E-03	2.750E-02	9.667E+00	2.077E-05	3.683E-05	7.050E-03
FBgn0000394	capu	protein_coding	2L:3872645-3902860	8.810E-04	1.309E-02	4.191E-01	4.588E-01	7.489E-05	7.385E-02	8.460E+00	6.407E-05	1.145E-04	1.328E-04		8.084E-03	1.879E-02	8.679E-02	1.274E-01	4.788E-04	9.200E-03	8.108E+00	2.647E-01	2.698E-01	9.781E-03
FBgn0000404	car	protein_coding	X:19460051-19463434	8.653E-03	1.587E-02	4.629E-02	1.042E-01	6.069E-04	6.328E-02	1.232E+01	6.570E-12	6.025E-11	1.522E-03		2.203E-02	1.894E-02	3.788E-03	1.425E-02	1.295E-03	1.581E-01	6.281E+00	6.215E-04	8.754E-04	1.551E-03
FBgn0000405	CkIIbeta	protein_coding	X:11686565-11695620	8.503E-03	1.269E-02	2.773E-02	8.024E-02	7.460E-04	2.957E-02	1.240E+01	4.506E-07	1.242E-06	3.201E-03		Not expressed in males	-	-	-	-	-	-	-	-	-
FBgn0000406	Cat	protein_coding	3L:18815703-18821288	1.655E-02	2.917E-02	4.694E-02	1.049E-01	6.316E-04	6.555E-02	1.184E+01	8.138E-11	5.567E-10	2.810E-03		3.718E-02	4.853E-02	1.790E-02	4.060E-02	8.528E-04	4.351E-02	1.226E+01	8.119E-16	1.660E-14	9.512E-03
FBgn0000409	Pka-C1	protein_coding	2L:9682314-9699297	4.656E-03	4.183E-03	4.481E-03	3.365E-02	1.239E-03	1.228E-02	1.358E+01	5.726E-10	3.049E-09	4.221E-03		1.379E-02	4.920E-03	2.233E-05	9.083E-04	3.119E-03	6.668E-03	1.361E+01	6.966E-05	1.134E-04	2.301E-02
FBgn0000412	Pka-C2	protein_coding	3R:26521258-26522860	4.706E-03	3.067E-03	9.715E-04	1.561E-02	1.708E-03	1.037E-02	1.052E+01	6.084E-05	1.092E-04	5.050E-03		2.166E-03	2.531E-03	1.333E-02	3.291E-02	9.528E-04	8.581E-03	9.574E+00	1.165E-02	1.364E-02	2.810E-03
FBgn0000413	CecA1	protein_coding	3R:26036595-26036995	3.343E-03	1.329E-02	1.773E-01	2.377E-01	2.801E-04	4.939E-02	1.019E+01	1.077E-05	2.231E-05	7.534E-04		7.858E-04	7.113E-03	3.186E-01	3.601E-01	1.230E-04	3.747E-02	9.022E+00	8.276E-05	1.333E-04	2.334E-04
FBgn0000414	CecA2	protein_coding	3R:26037877-26038290	7.790E-03	3.444E-02	1.779E-01	2.384E-01	2.518E-04	0.000E+00	6.970E+00	6.593E-01	6.650E-01	Inf		1.327E-03	3.968E-02	3.524E-01	3.909E-01	3.721E-05	9.391E-02	5.864E+00	1.924E-07	4.897E-07	1.572E-04
FBgn0000416	CecB	protein_coding	3R:26039036-26039519	4.185E-03	4.295E-03	8.034E-03	4.479E-02	1.085E-03	3.292E-03	1.262E+01	4.567E-03	6.004E-03	1.415E-02		1.247E-03	1.602E-03	1.583E-02	3.700E-02	8.665E-04	4.977E-03	1.262E+01	1.390E-05	2.534E-05	2.789E-03
FBgn0000422	CecC	protein_coding	3R:26042205-26042660	1.237E-02	2.929E-02	8.939E-02	1.509E-01	4.701E-04	1.448E-01	8.034E+00	6.463E-11	4.532E-10	9.511E-04		5.524E-03	4.113E-03	1.796E-03	8.905E-03	1.495E-03	5.495E-02	8.823E+00	5.473E-11	3.073E-10	1.119E-03
FBgn0000426	Cec-Psi1	pseudogene	3R:26037248-26037475	4.647E-03	7.674E-03	3.934E-02	9.512E-02	6.741E-04	3.501E-02	1.024E+01	2.248E-05	4.398E-05	1.477E-03		2.778E-02	1.252E-02	1.085E-04	1.928E-03	2.469E-03	2.771E-02	7.847E+00	7.421E-04	1.031E-03	1.116E-02
FBgn0000427	Cec2	pseudogene	3R:26038624-26038864	1.444E-02	6.345E-02	2.130E-01	2.714E-01	2.533E-04	2.177E-01	1.082E+01	2.864E-04	4.546E-04	7.383E-04		Not expressed in males	-	-	-	-	-	-	-	-	-
FBgn0000442	Cp190	protein_coding	3R:11096153-11100963	4.853E-03	1.935E-02	1.706E-01	2.312E-01	2.791E-04	7.390E-02	4.684E+00	4.496E-05	8.309E-05	7.310E-04		1.385E-02	2.167E-02	2.930E-02	5.749E-02	7.113E-04	4.220E-02	5.027E+00	5.371E-03	6.591E-03	3.652E-03
FBgn0000447	Cf2	protein_coding	2L:4876890-4883107	1.999E-03	2.277E-03	1.215E-02	5.459E-02	9.771E-04	4.840E-02	1.034E+01	6.196E-09	2.579E-08	4.598E-04		1.957E-03	1.346E-03	1.285E-03	7.336E-03	1.618E-03	1.229E-02	1.077E+01	2.999E-06	6.120E-06	1.772E-03
FBgn0000448	salr	protein_coding	2L:11358872-11373636	0.000E+00	1.686E-01	8.616E-01	8.667E-01	0.000E+00	0.000E+00	2.213E+00	7.884E-01	7.916E-01	NaN		1.385E-02	1.216E-01	3.498E-01	3.886E-01	1.268E-04	4.180E-19	2.224E+00	5.363E-01	5.383E-01	3.688E+14
FBgn0000449	cg	protein_coding	2R:10061197-10070343	6.749E-03	1.705E-02	8.969E-02	1.511E-01	4.405E-04	4.395E-03	3.642E+00	2.883E-01	2.990E-01	1.710E-02		Not expressed in males	-	-	-	-	-	-	-	-	-
FBgn0000454	Cg25C	protein_coding	2L:5029608-5037279	2.531E-03	3.748E-03	2.871E-02	8.126E-02	7.519E-04	2.318E-02	1.196E+01	6.408E-06	1.395E-05	1.216E-03		4.227E-03	5.268E-03	1.669E-02	3.858E-02	8.931E-04	2.844E-02	1.090E+01	2.913E-07	7.123E-07	1.655E-03
FBgn0000455	Cha	protein_coding	3R:14531222-14558066	8.827E-04	7.315E-03	2.796E-01	3.331E-01	1.343E-04	7.121E-02	9.629E+00	1.870E-10	1.146E-09	1.380E-04		3.733E-03	1.019E-02	1.022E-01	1.441E-01	4.077E-04	2.869E-02	9.397E+00	3.238E-10	1.522E-09	1.448E-03
FBgn0000459	chif	protein_coding	2L:16342429-16352628	8.689E-02	6.576E-02	2.098E-03	2.300E-02	1.471E-03	1.796E-01	5.116E+00	1.993E-07	5.958E-07	5.384E-03		5.265E-02	7.390E-02	2.461E-02	5.103E-02	7.930E-04	1.120E-01	5.136E+00	7.844E-07	1.773E-06	5.230E-03
FBgn0000463	chic	protein_coding	2L:5972114-5981018	1.153E-02	8.429E-03	1.739E-03	2.112E-02	1.523E-03	4.965E-02	9.292E+00	6.143E-02	6.888E-02	2.586E-03		1.548E-02	3.762E-02	9.385E-02	1.349E-01	4.581E-04	1.374E-01	4.415E+00	2.604E-04	3.887E-04	1.254E-03
FBgn0000464	chp	protein_coding	3R:27029901-27036452	3.708E-02	3.744E-02	7.243E-03	4.294E-02	1.102E-03	6.606E-02	6.816E+00	5.308E-03	6.905E-03	6.247E-03		1.991E-02	4.386E-02	7.529E-02	1.145E-01	5.052E-04	3.429E-02	5.914E+00	3.563E-02	3.927E-02	6.462E-03
FBgn0000473	cin	protein_coding	X:149706-152502	2.330E-02	6.420E-02	9.300E-02	1.546E-01	4.040E-04	8.462E+00	9.039E+00	1.615E-29	1.222E-25	3.065E-05		2.543E-02	2.229E-02	4.127E-03	1.512E-02	1.270E-03	3.993E+00	1.009E+01	9.408E-25	4.028E-22	7.089E-05
FBgn0000477	ck	protein_coding	2L:15044962-15057862	4.901E-03	5.651E-02	3.811E-01	4.249E-01	9.655E-05	2.249E-01	9.248E+00	2.301E-14	4.419E-13	2.425E-04		5.908E-02	7.216E-02	1.528E-02	3.614E-02	9.113E-04	1.859E-01	9.835E+00	8.064E-16	1.653E-14	3.538E-03
FBgn0000479	cl	protein_coding	2L:5520134-5521382	1.884E-02	1.545E-02	2.885E-03	2.660E-02	1.358E-03	9.714E-02	6.597E+00	1.153E-06	2.908E-06	2.159E-03		7.966E-03	6.896E-03	3.907E-03	1.455E-02	1.286E-03	5.810E-02	7.009E+00	2.628E-03	3.373E-03	1.526E-03
FBgn0000482	Chc	protein_coding	X:15722018-15729523	3.283E-03	1.234E-02	1.712E-01	2.317E-01	2.963E-04	0.000E+00	5.364E+00	5.060E-01	5.147E-01	Inf		Not expressed in males	-	-	-	-	-	-	-	-	-
FBgn0000489	eya	protein_coding	2L:6527446-6546976	9.385E-03	1.960E-02	6.824E-02	1.287E-01	5.331E-04	5.741E-02	8.994E+00	5.824E-03	7.533E-03	1.820E-03		3.010E-03	5.564E-03	5.216E-02	8.729E-02	6.021E-04	1.710E-02	1.035E+01	1.471E-04	2.289E-04	1.959E-03
FBgn0000490	clt	protein_coding	2R:17504565-17506584	3.797E-02	6.378E-02	3.718E-02	9.267E-02	6.627E-04	9.367E-02	7.108E+00	1.265E-02	1.554E-02	4.512E-03		3.003E-02	4.825E-02	3.575E-02	6.640E-02	6.927E-04	1.724E-01	7.301E+00	8.015E-04	1.107E-03	1.939E-03
FBgn0000492	cm	protein_coding	X:6903038-6905178	4.198E-02	7.760E-02	5.285E-02	1.118E-01	6.022E-04	2.000E-01	5.838E+00	1.003E-05	2.094E-05	2.337E-03		4.245E-02	7.362E-02	3.471E-02	6.496E-02	6.418E-04	3.908E-01	6.985E+00	3.390E-09	1.234E-08	1.209E-03
FBgn0000499	cn	protein_coding	2R:3670301-3672572	4.098E-03	1.628E-02	1.514E-01	2.132E-01	2.801E-04	2.341E-02	7.799E+00	4.432E-03	5.840E-03	1.949E-03		6.747E-03	1.122E-02	3.895E-02	7.051E-02	6.695E-04	1.547E-02	6.041E+00	2.667E-02	2.981E-02	4.855E-03
FBgn0000500	cni	protein_coding	2L:16309291-16310726	6.332E-02	6.019E-02	5.788E-03	3.880E-02	1.171E-03	4.740E-01	6.589E+00	1.150E-07	3.616E-07	1.487E-03		1.797E-02	1.702E-02	5.856E-03	1.921E-02	1.175E-03	3.639E-01	8.485E+00	2.080E-14	2.825E-13	5.497E-04
FBgn0000520	comt	protein_coding	X:13153053-13156521	4.761E-03	3.687E-02	3.279E-01	3.767E-01	1.437E-04	3.381E-02	5.553E+00	3.599E-03	4.806E-03	1.568E-03		Not expressed in males	-	-	-	-	-	-	-	-	-
FBgn0000524	cort	protein_coding	2L:6674681-6676635	1.968E-02	3.066E-02	2.793E-02	8.040E-02	7.142E-04	7.872E-02	9.899E+00	1.027E-06	2.612E-06	2.782E-03		3.530E-02	2.808E-02	2.671E-03	1.144E-02	1.399E-03	3.403E-02	5.464E+00	4.407E-04	6.356E-04	1.154E-02
FBgn0000527	cos	protein_coding	2R:3269680-3274620	4.076E-02	6.050E-02	2.868E-02	8.122E-02	7.499E-04	1.568E-01	5.544E+00	1.416E-11	1.168E-10	2.894E-03		2.841E-02	3.707E-02	1.756E-02	4.009E-02	8.530E-04	1.266E-01	7.067E+00	9.943E-07	2.205E-06	2.498E-03
FBgn0000533	Cp15	protein_coding	3L:8721580-8722166	5.798E-03	2.148E-02	1.469E-01	2.089E-01	3.005E-04	4.302E-02	6.751E+00	1.344E-04	2.271E-04	1.500E-03		Not expressed in males	-	-	-	-	-	-	-	-	-
FBgn0000536	Cp16	protein_coding	3L:8725043-8725699	4.544E-03	6.004E-03	1.950E-02	6.822E-02	8.425E-04	2.200E-02	1.001E+01	3.136E-05	5.944E-05	2.299E-03		5.789E-03	6.837E-03	1.280E-02	3.197E-02	9.426E-04	2.815E-02	1.007E+01	2.189E-07	5.483E-07	2.289E-03
FBgn0000543	Cp18	protein_coding	3L:8719890-8720713	5.566E-03	2.228E-02	1.526E-01	2.144E-01	2.781E-04	1.438E-02	7.164E+00	8.381E-02	9.243E-02	4.309E-03		1.033E-02	3.802E-02	1.777E-01	2.229E-01	3.023E-04	4.667E-02	5.921E+00	6.161E-04	8.687E-04	2.463E-03
FBgn0000556	Cp19	protein_coding	3L:8722964-8723704	2.858E-17	2.858E-03	6.872E-01	7.036E-01	1.113E-17	2.134E-03	1.396E+01	1.518E-01	1.621E-01	1.491E-16		9.903E-04	4.327E-03	2.041E-01	2.501E-01	2.547E-04	2.569E-03	1.381E+01	6.475E-02	6.960E-02	4.291E-03
FBgn0000557	Cp36	protein_coding	X:8373351-8374556	7.432E-03	2.404E-02	1.430E-01	2.054E-01	3.441E-04	9.396E-02	1.135E+01	7.832E-13	9.667E-12	8.804E-04		2.463E-03	4.336E-03	4.621E-02	7.999E-02	6.322E-04	1.743E-02	1.202E+01	1.172E-06	2.561E-06	1.572E-03
FBgn0000559	Cp38	protein_coding	X:8375869-8377344	5.458E-04	4.043E-04	1.874E-03	2.174E-02	1.503E-03	6.514E-04	1.390E+01	1.338E-01	1.437E-01	9.327E-03		1.132E-03	1.691E-03	2.966E-02	5.790E-02	7.451E-04	2.009E-03	1.372E+01	6.040E-02	6.509E-02	6.273E-03
FBgn0000562	crc	protein_coding	2L:21310865-21319527	2.602E-03	4.516E-03	4.453E-02	1.020E-01	6.415E-04	1.083E-03	1.045E+01	3.777E-01	3.881E-01	2.674E-02		8.213E-03	9.207E-03	1.077E-02	2.853E-02	9.930E-04	2.567E-02	9.750E+00	1.665E-03	2.189E-03	3.562E-03
FBgn0000565	crm	protein_coding	X:2628280-2632806	1.644E-01	6.847E-02	6.433E-05	3.196E-03	2.672E-03	2.189E-01	8.789E+00	1.374E-09	6.718E-09	8.360E-03		2.280E-01	1.420E-01	7.604E-04	5.465E-03	1.787E-03	1.079E+00	8.412E+00	3.732E-15	6.261E-14	2.352E-03
FBgn0000566	crn	protein_coding	X:2141626-2144016	7.997E-04	2.710E-03	1.364E-01	1.990E-01	3.285E-04	4.022E-02	9.870E+00	1.079E-07	3.417E-07	2.213E-04		8.542E-03	1.972E-02	8.005E-02	1.199E-01	4.822E-04	1.122E-01	8.524E+00	1.981E-08	6.169E-08	8.478E-04
FBgn0000567	csw	protein_coding	X:1988266-2009734	2.240E-02	3.716E-02	4.009E-02	9.635E-02	6.709E-04	1.030E-01	6.803E+00	1.336E-03	1.908E-03	2.421E-03		6.394E-03	1.896E-02	1.307E-01	1.755E-01	3.754E-04	9.268E-02	6.357E+00	7.597E-07	1.722E-06	7.680E-04
FBgn0000568	cta	protein_coding	2L:22874547-22885683	9.483E-02	6.002E-02	8.285E-04	1.387E-02	1.759E-03	1.504E-01	7.069E+00	2.342E-01	2.449E-01	7.019E-03		6.387E-02	1.187E-01	5.315E-02	8.827E-02	5.992E-04	3.396E-01	7.391E+00	5.241E-03	6.443E-03	2.093E-03
FBgn0000575	cup	protein_coding	2L:6663663-6674780	4.543E-03	1.010E-02	7.530E-02	1.365E-01	5.004E-04	2.387E-02	1.036E+01	3.587E-03	4.794E-03	2.119E-03		5.398E-03	4.428E-03	3.073E-03	1.247E-02	1.357E-03	5.524E-02	1.020E+01	6.951E-07	1.591E-06	1.088E-03
FBgn0000579	cv	protein_coding	X:5584034-5587117	2.491E-03	6.000E-03	8.230E-02	1.436E-01	4.620E-04	6.590E-03	1.304E+01	4.082E-04	6.332E-04	4.207E-03		9.163E-03	5.928E-03	9.338E-04	6.095E-03	1.720E-03	4.374E-03	1.326E+01	1.026E-02	1.211E-02	2.332E-02
FBgn0000588	cv-2	protein_coding	2R:17242519-17266969	3.441E-02	6.606E-02	5.028E-02	1.093E-01	5.798E-04	1.586E-01	9.364E+00	1.008E-06	2.568E-06	2.415E-03		Not expressed in males	-	-	-	-	-	-	-	-	-
FBgn0000592	CycA	protein_coding	3L:11819818-11826678	2.730E-03	2.498E-02	3.564E-01	4.022E-01	1.217E-04	5.141E-02	1.122E+01	1.885E-09	8.829E-09	5.912E-04		1.599E-02	9.651E-03	6.454E-04	4.970E-03	1.844E-03	3.881E-02	1.263E+01	3.230E-09	1.181E-08	4.585E-03
FBgn0000611	CycB	protein_coding	2R:18691025-18694453	3.634E-03	6.007E-03	3.390E-02	8.888E-02	6.734E-04	1.132E-02	1.037E+01	4.682E-02	5.337E-02	3.572E-03		7.464E-03	7.579E-03	7.804E-03	2.317E-02	1.096E-03	2.013E-02	9.452E+00	1.655E-04	2.553E-04	4.127E-03
FBgn0000615	Cyt-b5-r	protein_coding	2L:16788773-16790721	1.374E-02	3.192E-02	8.203E-02	1.434E-01	4.792E-04	1.291E-01	1.125E+01	1.080E-11	9.250E-11	1.185E-03		1.334E-02	1.212E-02	4.774E-03	1.677E-02	1.226E-03	3.723E-02	1.118E+01	1.338E-04	2.097E-04	3.988E-03
FBgn0000617	Cyt-c-p	protein_coding	2L:16719931-16722644	1.247E-03	3.769E-03	1.247E-01	1.870E-01	3.682E-04	1.418E-02	8.935E+00	1.561E-02	1.890E-02	9.789E-04		2.291E-03	7.102E-03	1.347E-01	1.793E-01	3.590E-04	1.110E-02	6.107E+00	3.934E-03	4.934E-03	2.298E-03
FBgn0000618	D	protein_coding	3L:14168709-14171720	6.920E-03	2.772E-02	1.964E-01	2.557E-01	2.778E-04	6.791E-03	8.116E+00	2.539E-01	2.645E-01	1.134E-02		6.958E-03	3.652E-02	2.489E-01	2.928E-01	2.121E-04	2.361E-02	6.640E+00	1.341E-03	1.789E-03	3.281E-03
FBgn0000629	D1	protein_coding	3R:5063804-5066376	1.753E-03	1.891E-02	3.491E-01	3.957E-01	1.032E-04	2.356E-02	8.730E+00	2.391E-03	3.279E-03	8.280E-04		1.529E-02	3.874E-02	9.515E-02	1.364E-01	4.393E-04	8.485E-03	6.436E+00	2.359E-02	2.656E-02	2.005E-02
FBgn0000633	da	protein_coding	2L:10388104-10393228	4.277E-02	5.726E-02	2.124E-02	7.091E-02	8.315E-04	1.353E-02	3.029E+00	1.966E-02	2.356E-02	3.519E-02		1.603E-02	2.661E-02	2.810E-02	5.590E-02	6.704E-04	2.361E-02	3.767E+00	7.200E-03	8.674E-03	7.556E-03
FBgn0000635	Dab	protein_coding	3L:16705225-16717675	5.706E-02	1.195E-01	7.033E-02	1.312E-01	5.317E-04	1.799E-01	7.070E+00	5.185E-03	6.759E-03	3.531E-03		0.000E+00	7.150E-02	7.543E-01	7.655E-01	0.000E+00	7.395E-02	7.667E+00	2.101E-03	2.732E-03	0.000E+00
FBgn0000636	Sap-r	protein_coding	3R:26709185-26714784	1.212E-02	8.532E-02	2.992E-01	3.512E-01	1.582E-04	6.924E-02	5.600E+00	1.363E-02	1.667E-02	1.949E-03		1.127E-02	2.289E-02	6.543E-02	1.028E-01	5.484E-04	8.131E-02	5.543E+00	2.033E-03	2.648E-03	1.544E-03
FBgn0000639	Ddc	protein_coding	2L:19116482-19120306	4.796E-02	4.832E-02	7.176E-03	4.282E-02	1.105E-03	8.094E-03	3.085E+00	2.723E-01	2.831E-01	6.596E-02		Not expressed in males	-	-	-	-	-	-	-	-	-
FBgn0000644	SmF	protein_coding	2R:8071348-8071815	7.590E-02	2.022E-01	1.109E-01	1.729E-01	4.178E-04	5.848E-01	9.127E+00	3.448E-03	4.622E-03	1.445E-03		Not expressed in males	-	-	-	-	-	-	-	-	-
FBgn0000659	dec-1	protein_coding	X:7761193-7767255	7.293E-03	8.890E-02	3.926E-01	4.349E-01	9.132E-05	4.180E-02	5.866E+00	2.251E-02	2.671E-02	1.942E-03		2.879E-02	6.357E-02	7.812E-02	1.177E-01	5.041E-04	7.504E-02	6.141E+00	1.237E-03	1.659E-03	4.270E-03
FBgn0000662	Dfd	protein_coding	3R:2617557-2628150	6.495E-03	1.001E-02	2.809E-02	8.057E-02	7.223E-04	1.677E-02	9.137E+00	1.272E-04	2.161E-04	4.311E-03		1.287E-02	9.924E-03	2.222E-03	1.019E-02	1.444E-03	2.316E-02	7.562E+00	9.636E-04	1.314E-03	6.187E-03
FBgn0000667	Pkg21D	protein_coding	2L:786152-790798	1.663E-02	3.254E-02	5.904E-02	1.186E-01	5.689E-04	6.364E-02	1.064E+01	2.877E-10	1.672E-09	2.909E-03		7.185E-03	1.470E-02	6.317E-02	1.003E-01	5.441E-04	6.130E-02	1.110E+01	7.014E-10	3.018E-09	1.305E-03
FBgn0000709	Dhod	protein_coding	3R:4477112-4478638	1.125E-03	1.006E-02	3.168E-01	3.665E-01	1.245E-04	1.491E-02	9.147E+00	8.469E-03	1.070E-02	8.398E-04		1.752E-02	1.851E-02	8.950E-03	2.538E-02	1.053E-03	3.344E-02	6.759E+00	1.336E-02	1.552E-02	5.831E-03
FBgn0000711	Hr46	protein_coding	2R:6091499-6124853	1.156E-03	2.131E-03	4.688E-02	1.049E-01	6.036E-04	1.252E-02	1.095E+01	3.020E-04	4.776E-04	1.028E-03		2.250E-03	3.661E-03	2.961E-02	5.785E-02	6.840E-04	2.182E-02	1.100E+01	8.993E-07	2.013E-06	1.148E-03
FBgn0000715	dib	protein_coding	3L:4062291-4064551	1.137E-02	7.706E-02	3.044E-01	3.559E-01	1.642E-04	1.238E-01	4.990E+00	4.600E-11	3.369E-10	1.022E-03		2.026E-02	3.014E-02	2.457E-02	5.098E-02	7.481E-04	3.342E-01	6.275E+00	3.981E-11	2.291E-10	6.747E-04
FBgn0000719	ect	protein_coding	3L:10183375-10194937	4.023E-03	4.658E-03	1.210E-02	5.447E-02	9.613E-04	3.486E-02	8.973E+00	1.854E-04	3.046E-04	1.284E-03		1.345E-02	1.098E-02	2.944E-03	1.214E-02	1.364E-03	7.035E-02	6.834E+00	6.658E-04	9.328E-04	2.127E-03
FBgn0000723	Dip-B	protein_coding	3R:9608009-9611398	1.983E-02	4.093E-02	6.561E-02	1.258E-01	5.393E-04	1.199E-01	7.436E+00	6.074E-07	1.619E-06	1.841E-03		7.279E-03	7.160E-03	6.855E-03	2.130E-02	1.132E-03	6.037E-02	8.216E+00	5.916E-07	1.372E-06	1.342E-03
FBgn0000810	Dip-C	protein_coding	3R:8237530-8239481	8.795E-03	9.933E-03	1.170E-02	5.351E-02	9.856E-04	1.755E-02	7.941E+00	1.281E-02	1.573E-02	5.578E-03		Not expressed in males	-	-	-	-	-	-	-	-	-
FBgn0000826	disco	protein_coding	X:16104630-16110783	1.285E-02	2.859E-02	7.909E-02	1.403E-01	5.002E-04	1.889E-01	6.245E+00	1.513E-10	9.476E-10	7.568E-04		Not expressed in males	-	-	-	-	-	-	-	-	-
FBgn0000927	Dl	protein_coding	3R:15128452-15151939	1.386E-02	1.110E-02	2.745E-03	2.599E-02	1.391E-03	7.616E-02	9.941E+00	1.592E-04	2.652E-04	2.026E-03		Not expressed in males	-	-	-	-	-	-	-	-	-
FBgn0000996	Lar	protein_coding	2L:19586622-19732069	1.491E-02	4.149E-02	1.129E-01	1.751E-01	4.000E-04	1.374E-01	1.058E+01	7.828E-12	7.026E-11	1.208E-03		Not expressed in males	-	-	-	-	-	-	-	-	-
FBgn0001075	Cyp6a2	protein_coding	2R:2667253-2668996	1.343E-01	4.262E-01	1.463E-01	2.084E-01	3.507E-04	2.127E-01	3.491E+00	7.121E-07	1.867E-06	7.028E-03		Not expressed in males	-	-	-	-	-	-	-	-	-
FBgn0001078	DNaseII	protein_coding	3R:13845096-13846883	9.122E-03	2.294E-02	8.892E-02	1.505E-01	4.427E-04	7.098E-02	9.152E+00	2.920E-03	3.950E-03	1.431E-03		5.543E-02	9.077E-02	3.403E-02	6.401E-02	6.797E-04	3.583E-02	5.023E+00	5.706E-03	6.983E-03	1.722E-02
FBgn0001079	dnc	protein_coding	X:3070472-3237800	1.345E-02	2.431E-02	4.627E-02	1.042E-01	6.157E-04	5.723E-02	8.187E+00	3.023E-07	8.714E-07	2.616E-03		9.373E-03	8.760E-03	5.521E-03	1.841E-02	1.191E-03	1.865E-03	4.620E+00	4.632E-01	4.659E-01	5.593E-02
FBgn0001083	dor	protein_coding	X:1559084-1562484	5.073E-02	1.876E-01	1.632E-01	2.247E-01	3.010E-04	9.148E-02	3.526E+00	3.525E-07	9.958E-07	6.173E-03		1.313E-02	2.738E-02	5.240E-02	8.749E-02	5.338E-04	1.614E-01	4.410E+00	1.929E-06	4.070E-06	9.057E-04
FBgn0001084	Pka-C3	protein_coding	3L:15918904-15947897	5.040E-02	6.946E-02	2.033E-02	6.981E-02	8.076E-04	3.750E-01	5.718E+00	5.419E-10	2.894E-09	1.496E-03		Not expressed in males	-	-	-	-	-	-	-	-	-
FBgn0001085	dpp	protein_coding	2L:2428371-2459823	7.285E-02	1.933E-02	2.542E-06	5.199E-04	4.196E-03	2.476E-01	7.055E+00	5.819E-08	1.956E-07	3.275E-03		2.136E-02	3.251E-02	2.789E-02	5.558E-02	7.313E-04	1.713E-02	3.859E+00	4.090E-02	4.484E-02	1.388E-02
FBgn0001086	Dr	protein_coding	3R:25382107-25390966	1.899E-02	4.291E-02	7.677E-02	1.381E-01	4.926E-04	2.352E-01	9.400E+00	1.078E-10	7.097E-10	8.986E-04		1.957E-02	2.433E-02	1.596E-02	3.722E-02	8.951E-04	1.345E-01	4.918E+00	8.794E-07	1.974E-06	1.620E-03
FBgn0001087	ds	protein_coding	2L:640012-714983	1.711E-03	5.162E-03	1.363E-01	1.989E-01	3.689E-04	1.038E-02	8.219E+00	2.416E-01	2.523E-01	1.834E-03		1.208E-02	2.140E-02	4.691E-02	8.084E-02	6.285E-04	9.080E-02	6.632E+00	2.934E-03	3.745E-03	1.481E-03
FBgn0001089	dsh	protein_coding	X:11249913-11252757	1.108E-01	1.111E-01	7.186E-03	4.284E-02	1.111E-03	4.944E-01	8.723E+00	7.778E-15	1.677E-13	2.496E-03		1.692E-01	6.486E-02	3.650E-05	1.164E-03	2.903E-03	3.979E-01	8.985E+00	1.452E-15	2.698E-14	4.733E-03
FBgn0001090	Dsk	protein_coding	3R:15413-15982	7.272E-03	7.462E-02	3.731E-01	4.178E-01	1.085E-04	4.838E-02	1.019E+01	5.683E-06	1.252E-05	1.673E-03		6.130E-03	1.409E-02	8.311E-02	1.234E-01	4.844E-04	2.742E-02	1.084E+01	1.447E-04	2.255E-04	2.489E-03
FBgn0001091	dsx	protein_coding	3R:3750044-3793130	4.305E-03	1.188E-02	1.083E-01	1.704E-01	4.033E-04	1.513E-02	1.322E+01	4.721E-06	1.054E-05	3.167E-03		2.356E-03	3.182E-03	2.091E-02	4.553E-02	8.243E-04	6.265E-03	1.342E+01	1.286E-03	1.722E-03	4.187E-03
FBgn0001092	dwg	protein_coding	X:2621730-2624075	1.192E-03	2.551E-03	7.020E-02	1.312E-01	5.204E-04	4.869E-03	1.285E+01	3.790E-08	1.323E-07	2.726E-03		1.291E-03	2.553E-03	6.110E-02	9.788E-02	5.629E-04	7.095E-03	1.253E+01	1.114E-07	2.976E-07	2.025E-03
FBgn0001098	dx	protein_coding	X:6428031-6432608	1.175E-02	1.275E-02	9.708E-03	4.901E-02	1.026E-03	1.613E-02	1.218E+01	5.674E-04	8.602E-04	8.110E-03		6.531E-03	5.928E-03	4.878E-03	1.695E-02	1.226E-03	4.682E-02	1.214E+01	2.114E-08	6.543E-08	1.553E-03
FBgn0001104	e	protein_coding	3R:17055560-17062899	4.641E-03	1.109E-02	8.554E-02	1.468E-01	4.657E-04	4.741E-02	1.091E+01	1.615E-12	1.832E-11	1.090E-03		2.543E-02	9.290E-03	2.607E-05	1.001E-03	3.046E-03	3.073E-02	8.897E+00	1.020E-07	2.743E-07	9.210E-03
FBgn0001105	bsh	protein_coding	2L:19765775-19769067	4.507E-03	3.002E-03	1.081E-03	1.670E-02	1.671E-03	9.073E-03	1.094E+01	1.118E-01	1.215E-01	5.530E-03		6.818E-04	3.290E-03	2.364E-01	2.811E-01	2.307E-04	7.827E-03	1.051E+01	1.226E-01	1.284E-01	9.697E-04
FBgn0001108	ea	protein_coding	3R:11154450-11156130	7.625E-03	9.999E-03	1.904E-02	6.770E-02	8.488E-04	2.669E-02	8.466E+00	4.917E-03	6.433E-03	3.180E-03		2.582E-02	2.872E-02	9.747E-03	2.671E-02	1.001E-03	1.544E-01	7.290E+00	7.269E-05	1.180E-04	1.862E-03
FBgn0001112	eag	protein_coding	X:14849509-14904022	3.939E-02	8.043E-02	6.354E-02	1.235E-01	5.451E-04	1.512E-01	4.342E+00	4.624E-08	1.592E-07	2.899E-03		2.491E-01	1.884E-01	2.075E-03	9.755E-03	1.472E-03	4.288E-01	8.964E+00	5.860E-11	3.261E-10	6.467E-03
FBgn0001114	eas	protein_coding	X:16172360-16179651	9.897E-03	1.642E-02	4.012E-02	9.639E-02	6.707E-04	7.116E-02	9.679E+00	3.350E-10	1.903E-09	1.548E-03		2.183E-02	5.171E-02	7.180E-02	1.105E-01	4.698E-04	1.253E-01	9.944E+00	4.176E-10	1.894E-09	1.940E-03
FBgn0001120	E(bx)	protein_coding	3L:233925-246912	4.839E-16	1.742E-02	5.412E-01	5.702E-01	3.092E-17	3.708E-02	1.101E+01	3.725E-07	1.048E-06	1.453E-16		Not expressed in males	-	-	-	-	-	-	-	-	-
FBgn0001122	ec	protein_coding	X:3705730-3751654	1.200E-03	2.942E-02	2.966E-01	3.492E-01	4.539E-05	9.036E-02	9.203E+00	2.320E-01	2.427E-01	1.478E-04		1.508E-02	1.909E-02	1.620E-02	3.767E-02	8.794E-04	6.992E-02	9.497E+00	2.670E-01	2.721E-01	2.401E-03
FBgn0001123	ecd	protein_coding	3L:2263580-2265857	1.322E-02	2.286E-02	4.081E-02	9.742E-02	6.436E-04	5.369E-02	9.781E+00	3.778E-11	2.827E-10	2.740E-03		2.068E-03	1.738E-03	3.428E-03	1.335E-02	1.324E-03	4.954E-02	1.030E+01	3.083E-12	2.405E-11	4.647E-04
FBgn0001124	EcR	protein_coding	2R:1975377-2056592	4.110E-03	3.389E-03	3.024E-03	2.730E-02	1.350E-03	2.488E-02	1.107E+01	4.682E-09	2.013E-08	1.839E-03		1.402E-03	4.729E-03	1.355E-01	1.803E-01	3.301E-04	2.785E-02	1.175E+01	1.911E-05	3.410E-05	5.604E-04
FBgn0001125	ed	protein_coding	2L:4031376-4115749	1.459E-03	4.143E-03	1.200E-01	1.816E-01	3.921E-04	4.245E-02	1.185E+01	1.319E-11	1.094E-10	3.827E-04		8.987E-03	1.017E-02	1.062E-02	2.831E-02	9.839E-04	7.022E-02	1.182E+01	9.977E-16	1.961E-14	1.425E-03
FBgn0001128	Edg78E	protein_coding	3L:21289862-21290903	2.016E-03	6.449E-03	1.434E-01	2.057E-01	3.479E-04	3.766E-02	1.278E+01	1.194E-05	2.450E-05	5.957E-04		1.110E-02	8.767E-03	2.577E-03	1.124E-02	1.409E-03	5.069E-02	1.285E+01	2.279E-07	5.676E-07	2.438E-03
FBgn0001133	Edg84A	protein_coding	3R:2510172-2510855	1.023E-02	3.255E-02	1.343E-01	1.968E-01	3.498E-04	3.374E-02	7.004E+00	1.739E-03	2.432E-03	3.374E-03		0.000E+00	2.234E-02	7.448E-01	7.569E-01	0.000E+00	1.755E-02	5.234E+00	1.126E-03	1.517E-03	0.000E+00
FBgn0001137	Ef1alpha48D	protein_coding	2R:7778639-7783267	1.077E-02	9.671E-03	4.525E-03	3.365E-02	1.240E-03	6.588E-02	7.466E+00	1.518E-05	3.059E-05	1.820E-03		1.108E-02	1.261E-02	1.212E-02	3.078E-02	9.779E-04	1.058E-01	6.771E+00	2.869E-06	5.871E-06	1.166E-03
FBgn0001142	Ef1alpha100E	protein_coding	3R:27564189-27569028	5.012E-03	1.201E-02	9.215E-02	1.539E-01	4.646E-04	1.610E-02	1.185E+01	1.942E-02	2.329E-02	3.465E-03		3.499E-03	1.624E-02	2.264E-01	2.717E-01	2.398E-04	4.988E-02	1.144E+01	1.641E-03	2.160E-03	7.807E-04
FBgn0001145	EF2	protein_coding	2L:21677912-21682164	7.406E-03	1.818E-02	8.520E-02	1.466E-01	4.534E-04	2.174E-02	1.115E+01	1.693E-02	2.040E-02	3.792E-03		4.809E-03	2.923E-03	6.654E-04	5.055E-03	1.831E-03	6.599E-03	1.175E+01	9.984E-02	1.054E-01	8.112E-03
FBgn0001168	eg	protein_coding	3L:21801802-21810700	2.632E-02	3.946E-02	2.980E-02	8.289E-02	7.424E-04	6.819E-02	1.061E+01	2.197E-02	2.612E-02	4.297E-03		7.219E-03	3.028E-02	1.687E-01	2.139E-01	2.653E-04	5.303E-02	1.104E+01	1.898E-02	2.162E-02	1.515E-03
FBgn0001169	egl	protein_coding	2R:19622426-19634352	1.854E-02	5.414E-02	1.017E-01	1.638E-01	3.812E-04	1.091E-01	7.918E+00	2.079E-04	3.376E-04	1.891E-03		4.462E-02	5.546E-02	1.546E-02	3.641E-02	8.956E-04	3.325E-01	4.783E+00	1.562E-02	1.801E-02	1.494E-03
FBgn0001179	Eh	protein_coding	3R:13272363-13274580	3.112E-20	1.876E-02	6.624E-01	6.818E-01	1.846E-21	2.978E-02	8.415E+00	3.219E-06	7.473E-06	1.163E-20		7.182E-03	2.587E-02	1.721E-01	2.173E-01	3.090E-04	1.112E-01	6.562E+00	1.929E-07	4.910E-07	7.187E-04
FBgn0001180	Eip71CD	protein_coding	3L:15504151-15506302	3.786E-02	4.525E-02	1.368E-02	5.772E-02	9.313E-04	1.160E-01	9.134E+00	1.755E-11	1.410E-10	3.633E-03		1.297E-02	2.746E-02	7.211E-02	1.108E-01	5.256E-04	2.912E-02	4.658E+00	2.492E-02	2.798E-02	4.956E-03
FBgn0001186	Eip55E	protein_coding	2R:14515422-14516900	2.853E-03	5.156E-02	3.478E-01	3.948E-01	6.159E-05	2.994E-02	9.694E+00	1.773E-02	2.132E-02	1.060E-03		7.610E-04	2.348E-02	4.795E-01	5.101E-01	3.608E-05	8.296E-04	1.021E+01	4.814E-01	4.839E-01	1.021E-02
FBgn0001187	Eip74EF	protein_coding	3L:17551771-17612425	4.801E-02	5.600E-02	1.299E-02	5.629E-02	9.543E-04	1.158E-01	9.594E+00	2.680E-14	5.018E-13	4.614E-03		1.427E-02	1.025E-02	1.615E-03	8.364E-03	1.550E-03	1.069E-01	1.048E+01	1.378E-16	3.571E-15	1.487E-03
FBgn0001189	Eip75B	protein_coding	3L:17944052-18057796	7.294E-03	2.973E-02	1.698E-01	2.306E-01	2.731E-04	3.632E-02	8.851E+00	1.069E-03	1.547E-03	2.235E-03		1.928E-02	2.090E-02	1.007E-02	2.736E-02	1.027E-03	3.367E-02	8.706E+00	8.844E-06	1.665E-05	6.375E-03
FBgn0001197	emc	protein_coding	3L:749399-753492	5.939E-03	1.081E-02	4.872E-02	1.072E-01	6.113E-04	5.335E-02	1.193E+01	3.229E-12	3.297E-11	1.239E-03		1.852E-03	3.718E-03	5.809E-02	9.433E-02	5.545E-04	1.292E-02	9.431E+00	5.102E-03	6.283E-03	1.596E-03
FBgn0001202	ems	protein_coding	3R:9727574-9730342	7.019E-04	8.092E-03	3.060E-01	3.570E-01	9.656E-05	4.221E-03	8.467E+00	4.221E-02	4.842E-02	1.851E-03		1.891E-21	9.992E-03	5.306E-01	5.580E-01	2.107E-22	9.117E-03	7.567E+00	1.053E-02	1.241E-02	2.309E-21
FBgn0001206	en	protein_coding	2R:7411510-7415715	1.167E-02	7.098E-02	2.412E-01	2.976E-01	1.830E-04	1.379E-01	5.791E+00	4.445E-03	5.855E-03	9.418E-04		Not expressed in males	-	-	-	-	-	-	-	-	-
FBgn0001208	ena	protein_coding	2R:15029136-15051210	2.255E-02	2.679E-02	1.372E-02	5.778E-02	9.369E-04	1.256E-01	1.107E+01	2.950E-16	9.537E-15	1.998E-03		8.424E-02	6.259E-02	1.911E-03	9.207E-03	1.498E-03	9.110E-02	1.147E+01	1.039E-14	1.531E-13	1.029E-02
FBgn0001217	Eno	protein_coding	2L:1724767-1729636	4.172E-02	3.595E-02	3.822E-03	3.123E-02	1.291E-03	3.252E-02	2.651E+00	2.655E-05	5.103E-05	1.428E-02		4.593E-03	1.858E-03	5.354E-05	1.405E-03	2.752E-03	4.467E-02	1.046E+01	8.194E-10	3.462E-09	1.144E-03
FBgn0001218	E(Pc)	protein_coding	2R:7339547-7352775	5.079E-03	5.047E-03	6.403E-03	4.077E-02	1.120E-03	2.606E-02	1.138E+01	1.188E-05	2.439E-05	2.170E-03		7.292E-03	7.924E-03	1.017E-02	2.749E-02	1.024E-03	2.358E-02	1.151E+01	3.640E-07	8.728E-07	3.443E-03
FBgn0001220	esc	protein_coding	2L:11827203-11829405	2.601E-03	1.560E-03	6.315E-04	1.164E-02	1.856E-03	8.973E-03	1.165E+01	6.684E-03	8.574E-03	3.227E-03		2.500E-03	3.138E-03	1.468E-02	3.511E-02	8.870E-04	1.714E-02	1.120E+01	5.197E-04	7.412E-04	1.624E-03
FBgn0001222	E(spl)m8-HLH	protein_coding	3R:21865961-21866730	3.840E-03	1.582E-02	1.768E-01	2.372E-01	2.702E-04	3.549E-02	1.087E+01	1.043E-10	6.892E-10	1.205E-03		5.947E-03	7.160E-03	1.403E-02	3.401E-02	9.246E-04	2.059E-02	9.578E+00	4.013E-05	6.780E-05	3.216E-03
FBgn0001223	Est-6	protein_coding	3L:12181917-12183805	1.349E-01	1.411E-01	8.793E-03	4.662E-02	1.064E-03	1.074E+00	9.588E+00	1.632E-16	5.716E-15	1.398E-03		3.587E-02	9.124E-02	6.694E-02	1.045E-01	4.376E-04	2.313E+00	9.537E+00	1.411E-17	4.927E-16	1.727E-04
FBgn0001224	Est-P	protein_coding	3L:12183832-12185628	4.256E-02	5.206E-02	1.562E-02	6.161E-02	9.100E-04	2.145E+00	7.474E+00	2.145E-15	5.339E-14	2.209E-04		1.122E-02	7.764E-03	1.326E-03	7.454E-03	1.608E-03	1.510E-01	1.001E+01	5.588E-16	1.206E-14	8.269E-04
FBgn0001225	eve	protein_coding	2R:5866823-5868300	2.429E-02	4.550E-02	5.301E-02	1.119E-01	5.941E-04	2.318E-01	1.217E+01	1.233E-15	3.281E-14	1.166E-03		9.175E-03	8.793E-03	6.063E-03	1.963E-02	1.161E-03	2.633E-01	1.016E+01	5.700E-14	6.953E-13	3.879E-04
FBgn0001226	exd	protein_coding	X:15886500-15890542	2.173E-02	3.600E-02	3.859E-02	9.462E-02	6.718E-04	2.877E-01	1.120E+01	4.614E-17	1.897E-15	8.405E-04		1.316E-02	1.235E-02	5.619E-03	1.863E-02	1.186E-03	1.827E-01	9.139E+00	2.184E-14	2.957E-13	8.018E-04
FBgn0001228	exu	protein_coding	2R:16554931-16558588	2.376E-02	5.369E-02	7.439E-02	1.355E-01	4.926E-04	6.746E-01	4.091E+00	1.562E-08	5.905E-08	3.920E-04		1.708E-02	1.180E-02	1.322E-03	7.447E-03	1.611E-03	9.358E-02	9.047E+00	8.756E-08	2.387E-07	2.031E-03
FBgn0001229	e(y)1	protein_coding	X:17736193-17737381	3.874E-02	5.704E-02	2.768E-02	8.019E-02	7.561E-04	1.519E-01	3.290E+00	3.615E-06	8.295E-06	2.838E-03		3.910E-03	1.688E-02	1.738E-01	2.189E-01	2.578E-04	9.032E-02	3.857E+00	1.725E-04	2.651E-04	4.819E-04
FBgn0001230	e(y)2	protein_coding	X:11470150-11470653	7.190E-02	2.629E-02	2.810E-05	2.105E-03	3.044E-03	1.339E-01	4.401E+00	7.641E-07	1.991E-06	5.976E-03		1.139E-02	1.027E-02	4.728E-03	1.668E-02	1.235E-03	1.398E-01	8.119E+00	3.778E-10	1.734E-09	9.067E-04
FBgn0001233	eyg	protein_coding	3L:12455636-12461121	2.209E-03	2.755E-03	1.564E-02	6.161E-02	8.926E-04	1.471E-02	1.331E+01	4.965E-11	3.615E-10	1.671E-03		6.360E-03	2.716E-03	7.728E-05	1.629E-03	2.606E-03	4.622E-02	1.252E+01	1.526E-14	2.155E-13	1.532E-03
FBgn0001247	E(z)	protein_coding	3L:10627674-10631230	1.305E-03	1.559E-03	1.390E-02	5.795E-02	9.316E-04	7.088E-03	9.532E+00	1.472E-02	1.792E-02	2.049E-03		1.094E-03	1.622E-03	2.645E-02	5.360E-02	7.504E-04	2.020E-02	9.560E+00	8.105E-09	2.735E-08	6.027E-04
FBgn0001248	fas	protein_coding	2R:9510548-9636872	9.556E-04	1.426E-03	2.806E-02	8.057E-02	7.460E-04	1.409E-02	1.217E+01	5.144E-09	2.192E-08	7.547E-04		4.047E-03	5.672E-03	1.967E-02	4.354E-02	7.943E-04	3.753E-02	1.240E+01	1.364E-13	1.498E-12	1.200E-03
FBgn0001250	Fas2	protein_coding	X:4026919-4100126	4.280E-02	4.223E-02	6.814E-03	4.216E-02	1.128E-03	7.985E-02	7.994E+00	4.813E-06	1.072E-05	5.966E-03		8.101E-03	7.088E-03	4.125E-03	1.512E-02	1.272E-03	3.843E-02	9.109E+00	2.220E-06	4.643E-06	2.347E-03
FBgn0001254	Fas3	protein_coding	2L:18320101-18393441	7.392E-01	2.831E+00	1.858E-01	2.462E-01	2.906E-04	5.739E-02	2.731E+00	1.185E-02	1.461E-02	1.434E-01		Not expressed in males	-	-	-	-	-	-	-	-	-
FBgn0001256	Fbp1	protein_coding	3L:14087688-14091153	4.431E-01	7.163E-01	3.690E-02	9.238E-02	6.885E-04	2.459E-01	3.979E+00	1.033E-01	1.127E-01	2.006E-02		Not expressed in males	-	-	-	-	-	-	-	-	-
FBgn0001257	Fbp2	protein_coding	2L:9426783-9427917	7.353E-03	1.014E-02	2.339E-02	7.419E-02	8.069E-04	8.364E-02	1.046E+01	5.647E-07	1.519E-06	9.786E-04		5.615E-02	1.978E-02	2.016E-05	8.588E-04	3.160E-03	1.481E-01	1.068E+01	3.070E-12	2.397E-11	4.221E-03
FBgn0001258	Fcp3C	protein_coding	X:3067408-3068507	4.814E-02	9.706E-02	6.447E-02	1.243E-01	5.520E-04	5.431E-01	7.621E+00	2.323E-09	1.066E-08	9.866E-04		4.945E-02	3.645E-02	1.715E-03	8.688E-03	1.510E-03	2.047E-01	8.558E+00	6.313E-15	9.820E-14	2.689E-03
FBgn0001263	fj	protein_coding	2R:14120265-14123816	7.538E-02	9.779E-02	1.822E-02	6.646E-02	8.580E-04	1.783E-01	7.320E+00	5.355E-07	1.449E-06	4.705E-03		1.072E-02	6.250E-03	5.228E-04	4.489E-03	1.910E-03	7.990E-02	8.718E+00	5.271E-09	1.839E-08	1.494E-03
FBgn0001276	fkh	protein_coding	3R:24406697-24410986	0.000E+00	5.796E-02	5.493E-01	5.779E-01	0.000E+00	6.848E-02	5.932E+00	2.582E-05	4.980E-05	0.000E+00		Not expressed in males	-	-	-	-	-	-	-	-	-
FBgn0001280	fl(2)d	protein_coding	2R:9707128-9712058	2.949E-03	1.023E-02	1.569E-01	2.190E-01	3.209E-04	2.946E-02	9.502E+00	2.868E-06	6.714E-06	1.114E-03		6.143E-03	5.035E-03	3.074E-03	1.247E-02	1.358E-03	2.602E-02	9.980E+00	6.103E-05	1.003E-04	2.628E-03
FBgn0001285	Actn	protein_coding	X:1917854-1936344	1.118E-01	2.079E-02	1.434E-07	9.040E-05	5.985E-03	3.329E+00	9.203E+00	4.049E-24	1.915E-21	3.737E-04		8.362E-02	3.020E-02	2.402E-05	9.551E-04	3.082E-03	5.033E+00	8.009E+00	5.015E-23	1.236E-20	1.849E-04
FBgn0001291	fliI	protein_coding	X:21210767-21216115	5.675E-02	2.718E-02	1.632E-04	5.562E-03	2.325E-03	4.075E-02	8.817E+00	4.174E-04	6.462E-04	1.550E-02		3.688E-02	2.443E-02	1.053E-03	6.513E-03	1.680E-03	3.695E-02	8.194E+00	1.853E-03	2.422E-03	1.111E-02
FBgn0001296	flw	protein_coding	X:10279992-10303850	2.905E-02	3.403E-02	1.224E-02	5.472E-02	9.503E-04	1.601E-01	7.617E+00	1.795E-04	2.959E-04	2.020E-03		2.704E-02	3.810E-02	2.452E-02	5.091E-02	7.900E-04	1.064E-01	5.457E+00	1.607E-03	2.119E-03	2.829E-03
FBgn0001297	FMRFa	protein_coding	2R:5793798-5797962	6.001E-02	8.042E-02	2.057E-02	7.014E-02	8.306E-04	4.735E-02	9.439E+00	4.068E-04	6.310E-04	1.411E-02		9.402E-03	1.916E-02	6.104E-02	9.780E-02	5.462E-04	2.263E-02	9.766E+00	2.116E-02	2.399E-02	4.625E-03
FBgn0001308	fog	protein_coding	X:22226152-22257030	5.651E-03	1.020E-02	4.936E-02	1.081E-01	6.168E-04	2.620E-03	8.716E+00	3.857E-01	3.958E-01	2.401E-02		7.594E-03	9.124E-03	1.436E-02	3.460E-02	9.265E-04	1.815E-02	7.310E+00	5.211E-03	6.409E-03	4.657E-03
FBgn0001320	for	protein_coding	2L:3622073-3656953	4.770E-02	6.316E-02	1.980E-02	6.875E-02	8.406E-04	4.974E-02	5.033E+00	1.580E-03	2.228E-03	1.067E-02		3.885E-02	1.544E-02	4.773E-05	1.293E-03	2.800E-03	2.502E-02	5.673E+00	3.096E-02	3.434E-02	1.729E-02
FBgn0001323	FER	protein_coding	3R:5193324-5220268	2.163E-02	4.203E-02	5.911E-02	1.187E-01	5.729E-04	3.339E-02	3.715E+00	6.020E-03	7.768E-03	7.211E-03		2.309E-02	2.442E-02	8.755E-03	2.500E-02	1.052E-03	1.799E-02	3.718E+00	4.255E-02	4.658E-02	1.429E-02
FBgn0001324	gd	protein_coding	X:11879566-11881797	2.459E-03	7.666E-03	1.371E-01	1.996E-01	3.571E-04	0.000E+00	5.208E+00	6.327E-01	6.386E-01	Inf		1.850E-02	5.083E-02	1.172E-01	1.607E-01	4.050E-04	3.352E-02	6.176E+00	5.514E-06	1.074E-05	6.142E-03
FBgn0001330	fs(1)K10	protein_coding	X:2136170-2140074	7.584E-03	2.416E-02	9.368E-02	1.554E-01	3.494E-04	6.944E-02	6.982E+00	4.644E-05	8.565E-05	1.216E-03		Not expressed in males	-	-	-	-	-	-	-	-	-
FBgn0001332	png	protein_coding	X:1250520-1251634	3.005E-03	3.895E-03	1.816E-02	6.637E-02	8.589E-04	2.335E-02	1.070E+01	6.555E-09	2.712E-08	1.433E-03		1.414E-02	9.421E-03	1.091E-03	6.632E-03	1.671E-03	5.648E-02	9.280E+00	1.760E-09	6.830E-09	2.787E-03
FBgn0001341	fs(1)Ya	protein_coding	X:2618318-2620610	8.113E-03	9.993E-03	1.323E-02	5.676E-02	9.037E-04	6.134E-02	7.243E+00	1.225E-11	1.034E-10	1.472E-03		Not expressed in males	-	-	-	-	-	-	-	-	-
FBgn0001404	fs(1)Yb	protein_coding	X:2614500-2618191	6.285E-03	1.282E-02	6.486E-02	1.249E-01	5.456E-04	0.000E+00	7.925E+00	8.906E-01	8.922E-01	Inf		5.732E-03	1.807E-02	1.441E-01	1.891E-01	3.532E-04	3.204E-02	7.319E+00	3.258E-01	3.303E-01	1.991E-03
FBgn0001491	tj	protein_coding	2L:19464266-19467758	3.855E-03	5.445E-03	2.491E-02	7.611E-02	7.880E-04	1.678E-02	9.732E+00	9.006E-06	1.901E-05	2.557E-03		1.351E-03	3.486E-03	8.348E-02	1.238E-01	4.315E-04	1.044E-02	9.320E+00	6.006E-03	7.324E-03	1.440E-03
FBgn0001565	dup	protein_coding	2R:11264123-11268493	5.808E-03	2.711E-03	1.365E-04	4.917E-03	2.385E-03	1.361E-02	1.059E+01	4.768E-03	6.251E-03	4.750E-03		2.323E-02	8.883E-03	3.596E-05	1.154E-03	2.911E-03	4.764E-02	9.588E+00	2.557E-06	5.284E-06	5.427E-03
FBgn0001612	ft	protein_coding	2L:4198403-4221796	1.181E-02	2.249E-02	4.591E-02	1.037E-01	5.845E-04	6.007E-02	7.891E+00	7.256E-06	1.557E-05	2.189E-03		1.021E-02	1.427E-02	2.397E-02	5.023E-02	7.968E-04	5.267E-02	5.210E+00	5.987E-05	9.849E-05	2.158E-03
FBgn0001941	ftz	protein_coding	3R:2690045-2691966	5.992E-04	5.430E-03	3.441E-01	3.914E-01	1.228E-04	1.362E-02	9.778E+00	3.068E-02	3.581E-02	4.897E-04		8.995E-03	9.169E-03	7.796E-03	2.316E-02	1.092E-03	2.748E-02	8.887E+00	3.363E-04	4.933E-04	3.644E-03
FBgn0001942	ftz-f1	protein_coding	3L:18743706-18794409	1.059E-03	9.027E-04	3.682E-03	3.040E-02	1.306E-03	1.734E-04	1.294E+01	4.038E-01	4.139E-01	6.799E-02		0.000E+00	1.669E-03	5.588E-01	5.840E-01	0.000E+00	4.044E-03	1.273E+01	7.028E-05	1.143E-04	0.000E+00
FBgn0001961	fu	protein_coding	X:18551787-18555237	6.433E-02	6.080E-02	5.544E-03	3.771E-02	1.178E-03	2.532E-02	9.989E+00	3.483E-06	8.021E-06	2.828E-02		1.919E-02	5.892E-02	1.394E-01	1.843E-01	3.626E-04	3.291E-02	1.004E+01	1.325E-07	3.485E-07	6.492E-03
FBgn0001965	fw	protein_coding	X:11886947-11897947	7.973E-03	1.707E-02	7.030E-02	1.312E-01	5.200E-04	5.047E-02	7.958E+00	1.017E-02	1.266E-02	1.759E-03		5.907E-03	1.646E-02	1.080E-01	1.507E-01	3.995E-04	1.574E-02	5.778E+00	6.203E-02	6.678E-02	4.177E-03
FBgn0001970	fy	protein_coding	2L:8401475-8403280	6.621E-03	2.223E-02	1.583E-01	2.200E-01	3.316E-04	7.608E-02	4.745E+00	9.960E-05	1.719E-04	9.687E-04		1.174E-02	1.146E-02	6.604E-03	2.071E-02	1.141E-03	6.979E-03	4.075E+00	8.616E-02	9.149E-02	1.873E-02
FBgn0001974	fz	protein_coding	3L:14267442-14361739	6.546E-03	2.502E-02	1.524E-01	2.143E-01	2.912E-04	6.128E-02	8.383E+00	5.901E-07	1.579E-06	1.189E-03		1.916E-03	1.942E-02	3.506E-01	3.893E-01	1.098E-04	1.114E-01	6.301E+00	2.461E-08	7.506E-08	1.914E-04
FBgn0001977	fzy	protein_coding	2L:16310955-16313097	5.580E-03	5.866E-03	8.921E-03	4.688E-02	1.059E-03	9.811E-03	4.452E+00	2.871E-02	3.363E-02	6.331E-03		Not expressed in males	-	-	-	-	-	-	-	-	-
FBgn0001978	g	protein_coding	X:13621236-13630311	1.416E-03	7.508E-03	2.557E-01	3.103E-01	2.099E-04	1.308E-02	1.078E+01	2.579E-03	3.522E-03	1.205E-03		6.136E-17	1.242E-02	5.985E-01	6.206E-01	5.501E-18	6.153E-03	9.598E+00	1.916E-01	1.974E-01	1.110E-16
FBgn0001981	Gal	protein_coding	2L:6003573-6006827	1.130E-01	1.072E-01	5.868E-03	3.912E-02	1.173E-03	2.668E-01	3.751E+00	1.084E-06	2.749E-06	4.715E-03		1.282E-02	2.628E-02	6.341E-02	1.005E-01	5.431E-04	1.843E-01	4.067E+00	9.150E-09	3.040E-08	7.746E-04
FBgn0001986	bnb	protein_coding	X:18688278-18691720	7.758E-03	3.177E-02	1.886E-01	2.489E-01	2.719E-04	8.318E-02	7.001E+00	3.096E-03	4.176E-03	1.038E-03		3.484E-03	1.049E-02	1.313E-01	1.760E-01	3.697E-04	5.148E-02	4.203E+00	9.782E-06	1.830E-05	7.533E-04
FBgn0001987	Gapdh1	protein_coding	2R:3679405-3680885	0.000E+00	1.468E-02	6.725E-01	6.901E-01	0.000E+00	4.073E-02	7.673E+00	1.100E-02	1.362E-02	0.000E+00		2.158E-03	2.347E-02	3.677E-01	4.057E-01	1.023E-04	2.672E-02	8.050E+00	6.937E-07	1.589E-06	8.987E-04
FBgn0001989	Gapdh2	protein_coding	X:15762177-15763694	1.882E-02	5.443E-02	1.121E-01	1.741E-01	3.848E-04	4.030E-02	1.149E+01	4.474E-07	1.235E-06	5.198E-03		4.016E-02	1.707E-02	7.434E-05	1.622E-03	2.618E-03	1.078E-02	1.192E+01	1.919E-03	2.505E-03	4.148E-02
FBgn0001990	Gdh	protein_coding	3R:19761679-19768823	1.199E-02	4.402E-02	1.453E-01	2.074E-01	3.033E-04	2.934E-02	7.533E+00	1.046E-03	1.515E-03	4.551E-03		Not expressed in males	-	-	-	-	-	-	-	-	-
FBgn0001991	gdl	protein_coding	3L:15502544-15504147	5.097E-02	9.495E-02	5.040E-02	1.094E-01	5.976E-04	2.280E-01	5.266E+00	1.500E-06	3.703E-06	2.489E-03		7.045E-03	1.370E-02	5.641E-02	9.241E-02	5.723E-04	1.003E-01	7.568E+00	9.487E-04	1.296E-03	7.818E-04
FBgn0001994	Galphai	protein_coding	3L:6965849-6973144	9.072E-03	8.092E-02	3.494E-01	3.958E-01	1.248E-04	2.059E-02	6.973E+00	3.793E-01	3.896E-01	4.905E-03		1.884E-02	5.553E-02	1.309E-01	1.756E-01	3.777E-04	1.329E-01	6.142E+00	2.582E-02	2.892E-02	1.579E-03
FBgn0001995	Gbeta13F	protein_coding	X:15754147-15760208	2.343E-03	4.894E-03	5.860E-02	1.182E-01	5.329E-04	1.841E-02	9.502E+00	8.207E-07	2.123E-06	1.417E-03		1.247E-02	1.086E-02	4.056E-03	1.492E-02	1.278E-03	1.632E-02	8.516E+00	9.532E-04	1.301E-03	8.509E-03
FBgn0002021	Gl	protein_coding	3L:13922486-13927756	8.573E-03	1.029E-02	1.402E-02	5.817E-02	9.272E-04	1.545E-02	8.188E+00	4.919E-03	6.434E-03	6.177E-03		3.630E-03	1.884E-02	1.811E-01	2.267E-01	2.145E-04	5.853E-02	6.999E+00	9.165E-07	2.047E-06	6.904E-04
FBgn0002022	Gld	protein_coding	3R:3077784-3091425	2.596E-03	3.160E-03	1.440E-02	5.903E-02	9.145E-04	3.994E-03	9.149E+00	2.531E-02	2.982E-02	7.235E-03		3.628E-03	3.483E-03	6.125E-03	1.975E-02	1.160E-03	1.618E-02	9.350E+00	2.372E-07	5.892E-07	2.496E-03
FBgn0002031	Glt	protein_coding	2L:8672697-8676804	1.856E-03	2.620E-03	2.493E-02	7.613E-02	7.885E-04	1.761E-02	1.104E+01	1.972E-07	5.908E-07	1.173E-03		0.000E+00	6.398E-03	9.285E-01	9.308E-01	0.000E+00	1.785E-02	1.024E+01	3.808E-06	7.654E-06	0.000E+00
FBgn0002036	gnu	protein_coding	3L:14795479-14796460	1.895E-02	3.640E-02	3.928E-02	9.509E-02	5.795E-04	2.245E-01	7.321E+00	1.405E-05	2.844E-05	9.397E-04		2.990E-03	2.516E-03	3.459E-03	1.341E-02	1.323E-03	2.690E-02	1.008E+01	2.032E-05	3.612E-05	1.237E-03
FBgn0002044	Galphao	protein_coding	2R:6325489-6353206	4.234E-03	1.153E-02	9.575E-02	1.575E-01	4.086E-04	3.447E-03	1.030E+01	6.288E-02	7.039E-02	1.367E-02		4.220E-03	1.141E-02	1.140E-01	1.570E-01	4.118E-04	4.956E-03	9.233E+00	2.190E-01	2.244E-01	9.478E-03
FBgn0002069	Galphas	protein_coding	2R:19830060-19834459	2.146E-03	1.880E-03	4.045E-03	3.209E-02	1.270E-03	8.720E-03	1.131E+01	3.934E-05	7.340E-05	2.739E-03		3.565E-03	8.413E-03	8.544E-02	1.259E-01	4.717E-04	2.333E-02	1.035E+01	1.650E-08	5.223E-08	1.701E-03
FBgn0002174	Got1	protein_coding	2R:12025856-12029433	7.903E-03	5.267E-03	1.094E-03	1.673E-02	1.670E-03	3.082E-02	9.002E+00	1.363E-03	1.945E-03	2.854E-03		2.877E-03	1.426E-03	2.093E-04	2.665E-03	2.246E-03	8.677E-02	9.619E+00	2.486E-11	1.522E-10	3.690E-04
FBgn0002183	Got2	protein_coding	2L:1984511-1987758	6.846E-03	1.781E-02	9.437E-02	1.559E-01	4.278E-04	1.690E-02	1.048E+01	4.885E-02	5.546E-02	4.509E-03		0.000E+00	2.235E-02	6.721E-01	6.884E-01	0.000E+00	3.295E-02	7.949E+00	3.430E-02	3.787E-02	0.000E+00
FBgn0002283	Gpdh	protein_coding	2L:5943642-5948968	7.376E-03	1.346E-02	5.113E-02	1.100E-01	6.101E-04	6.257E-02	9.284E+00	9.420E-09	3.757E-08	1.312E-03		1.139E-02	1.417E-02	1.586E-02	3.707E-02	8.945E-04	8.863E-03	6.820E+00	1.622E-02	1.864E-02	1.430E-02
FBgn0002284	grau	protein_coding	2R:16897268-16899426	1.610E-03	5.376E-03	1.408E-01	2.032E-01	3.333E-04	1.549E-02	1.141E+01	4.700E-04	7.213E-04	1.157E-03		0.000E+00	2.716E-03	7.000E-01	7.149E-01	0.000E+00	1.015E-02	1.123E+01	5.184E-05	8.629E-05	0.000E+00
FBgn0002306	Grd	protein_coding	3L:17816432-17832867	8.770E-03	9.512E-02	3.673E-01	4.124E-01	1.026E-04	1.363E-01	4.464E+00	1.206E-03	1.735E-03	7.159E-04		1.693E-03	2.869E-02	3.992E-01	4.348E-01	6.571E-05	1.092E-01	6.059E+00	1.446E-04	2.255E-04	1.726E-04
FBgn0002354	grk	protein_coding	2L:8431085-8433598	6.573E-17	6.252E-03	7.255E-01	7.387E-01	1.170E-17	1.045E-02	9.548E+00	2.487E-02	2.932E-02	7.003E-17		5.091E-03	8.841E-03	4.394E-02	7.715E-02	6.409E-04	1.471E-02	9.088E+00	3.584E-02	3.950E-02	3.851E-03
FBgn0002413	grn	protein_coding	3R:3973089-4007166	2.113E-03	8.781E-03	1.671E-01	2.285E-01	2.678E-04	3.459E-02	1.057E+01	1.304E-08	5.026E-08	6.799E-04		4.552E-20	4.001E-02	5.697E-01	5.937E-01	1.266E-21	1.133E-01	9.067E+00	1.418E-04	2.215E-04	4.471E-21
FBgn0002431	gro	protein_coding	3R:21867457-21875633	2.461E-03	4.196E-03	3.330E-02	8.812E-02	6.528E-04	0.000E+00	1.032E+01	6.956E-01	7.005E-01	Inf		2.284E-03	4.391E-03	5.747E-02	9.361E-02	5.790E-04	3.171E-02	9.702E+00	1.305E-04	2.049E-04	8.017E-04
FBgn0002441	Gs1	protein_coding	2L:132076-134472	1.086E-03	1.436E-02	4.086E-01	4.497E-01	8.417E-05	2.402E-02	7.238E+00	9.802E-02	1.073E-01	5.034E-04		5.278E-03	1.555E-02	1.031E-01	1.451E-01	3.778E-04	2.973E-02	5.988E+00	3.049E-02	3.385E-02	1.976E-03
FBgn0002466	Gs2	protein_coding	X:11316864-11324230	1.398E-01	1.253E-01	4.571E-03	3.381E-02	1.242E-03	1.678E-01	6.605E+00	5.737E-08	1.930E-07	9.271E-03		Not expressed in males	-	-	-	-	-	-	-	-	-
FBgn0002521	gsb-n	protein_coding	2R:20927905-20939854	8.133E-03	9.875E-03	1.428E-02	5.873E-02	9.168E-04	2.394E-02	1.040E+01	3.060E-07	8.803E-07	3.782E-03		1.434E-03	2.152E-03	2.779E-02	5.549E-02	7.420E-04	9.136E-03	9.243E+00	1.111E-03	1.499E-03	1.747E-03
FBgn0002524	gsb	protein_coding	2R:20949486-20952166	6.893E-03	1.066E-02	2.592E-02	7.750E-02	7.196E-04	1.783E-02	9.950E+00	1.890E-04	3.100E-04	4.304E-03		5.479E-03	7.733E-03	2.451E-02	5.091E-02	7.887E-04	2.206E-02	8.693E+00	3.306E-05	5.671E-05	2.765E-03
FBgn0002525	GstD1	protein_coding	3R:8193538-8194990	8.286E-03	6.971E-03	3.443E-03	2.963E-02	1.323E-03	2.284E-02	8.515E+00	1.641E-03	2.306E-03	4.038E-03		4.456E-03	1.756E-02	1.723E-01	2.174E-01	2.825E-04	2.786E-02	7.059E+00	6.852E-05	1.117E-04	1.780E-03
FBgn0002526	gt	protein_coding	X:2321145-2323000	2.641E-02	3.303E-02	1.695E-02	6.404E-02	8.899E-04	1.213E-01	9.222E+00	1.922E-08	7.131E-08	2.423E-03		2.590E-02	1.117E-02	8.136E-05	1.655E-03	2.580E-03	1.400E-01	6.932E+00	9.761E-11	5.201E-10	2.060E-03
FBgn0002542	h	protein_coding	3L:8668858-8672353	9.740E-03	3.725E-02	1.582E-01	2.199E-01	2.911E-04	2.158E-01	7.344E+00	5.984E-07	1.598E-06	5.024E-04		3.281E-02	3.972E-02	1.429E-02	3.448E-02	9.196E-04	3.393E-02	3.882E+00	8.374E-06	1.584E-05	1.077E-02
FBgn0002552	H	protein_coding	3R:16447659-16454637	1.522E-02	3.189E-02	6.781E-02	1.282E-01	5.312E-04	1.480E-01	8.340E+00	1.071E-07	3.396E-07	1.145E-03		1.064E-02	2.479E-02	8.483E-02	1.253E-01	4.777E-04	2.668E-02	4.890E+00	3.082E-03	3.916E-03	4.438E-03
FBgn0002563	H2.0	protein_coding	2L:6013058-6019402	4.094E-01	4.693E-01	1.244E-02	5.523E-02	9.709E-04	1.183E+00	3.711E+00	1.270E-12	1.483E-11	3.850E-03		2.656E-01	5.031E-01	5.242E-02	8.750E-02	5.877E-04	1.193E+01	5.469E+00	4.331E-18	1.895E-16	2.478E-04
FBgn0002564	halo	protein_coding	2L:1517532-1518148	4.165E-01	3.726E-01	4.474E-03	3.365E-02	1.244E-03	1.127E-01	2.723E+00	2.404E-14	4.581E-13	4.112E-02		2.273E-01	1.284E-01	4.499E-04	4.108E-03	1.971E-03	2.136E-01	3.080E+00	1.598E-13	1.717E-12	1.185E-02
FBgn0002565	hay	protein_coding	3L:10624178-10627069	8.724E-01	1.199E+00	2.310E-02	7.355E-02	8.101E-04	1.232E+00	3.722E+00	3.622E-12	3.649E-11	7.884E-03		9.868E-01	1.763E+00	4.246E-02	7.527E-02	6.229E-04	4.522E+00	4.884E+00	3.658E-15	6.174E-14	2.429E-03
FBgn0002566	hb	protein_coding	3R:4516701-4523544	2.840E-03	2.555E-03	4.195E-03	3.263E-02	1.237E-03	1.363E-02	9.181E+00	2.319E-06	5.532E-06	2.319E-03		1.173E-03	7.182E-03	2.054E-01	2.512E-01	1.818E-04	2.312E-02	8.686E+00	7.481E-08	2.075E-07	5.649E-04
FBgn0002567	her	protein_coding	2L:16677184-16679691	3.909E-03	2.670E-03	1.215E-03	1.781E-02	1.630E-03	7.566E-03	1.035E+01	1.331E-01	1.431E-01	5.751E-03		7.042E-03	1.021E-02	2.723E-02	5.475E-02	7.678E-04	4.563E-02	9.905E+00	6.769E-09	2.318E-08	1.718E-03
FBgn0002569	Hex-A	protein_coding	X:9479707-9483846	4.183E-01	1.632E-01	4.112E-05	2.571E-03	2.854E-03	1.150E+00	8.691E+00	8.508E-18	4.320E-16	4.049E-03		2.176E-01	1.312E-01	6.408E-04	4.951E-03	1.846E-03	4.833E-01	9.408E+00	1.901E-16	4.745E-15	5.012E-03
FBgn0002570	Hex-C	protein_coding	2R:11106341-11107834	8.620E-02	1.312E-01	3.026E-02	8.367E-02	7.315E-04	9.785E-01	1.141E+01	1.659E-21	2.988E-19	9.806E-04		7.471E-02	4.928E-02	1.031E-03	6.452E-03	1.688E-03	2.600E-01	1.271E+01	1.907E-18	9.127E-17	3.199E-03
FBgn0002571	hfw	protein_coding	X:1563602-1567641	7.372E-01	2.632E-01	2.232E-05	1.987E-03	3.117E-03	5.950E-01	7.948E+00	2.008E-16	6.782E-15	1.379E-02		5.314E-01	2.190E-01	6.974E-05	1.571E-03	2.702E-03	5.393E-01	9.233E+00	1.408E-13	1.536E-12	1.097E-02
FBgn0002578	His2Av	protein_coding	3R:22692650-22694942	1.564E-01	1.141E-01	1.682E-03	2.066E-02	1.526E-03	2.361E-01	1.008E+01	3.596E-13	4.938E-12	7.375E-03		2.505E-01	9.906E-02	4.611E-05	1.272E-03	2.815E-03	2.811E-01	9.297E+00	1.624E-11	1.032E-10	9.920E-03
FBgn0002579	hk	protein_coding	2L:19030843-19033498	5.324E-04	4.170E-04	2.461E-03	2.480E-02	1.421E-03	1.324E-03	1.360E+01	2.867E-03	3.884E-03	4.475E-03		1.048E-03	2.710E-03	1.027E-01	1.447E-01	4.304E-04	2.814E-03	1.319E+01	4.571E-04	6.574E-04	4.145E-03
FBgn0002590	Hmr	protein_coding	X:10484952-10489888	7.296E-04	1.817E-03	9.221E-02	1.539E-01	4.471E-04	2.875E-03	1.388E+01	6.994E-04	1.042E-03	2.825E-03		2.175E-03	2.360E-03	9.439E-03	2.622E-02	1.026E-03	3.351E-03	1.357E+01	9.459E-06	1.773E-05	7.224E-03
FBgn0002593	Hn	protein_coding	3L:7753552-7756266	3.800E-04	4.658E-04	1.401E-02	5.813E-02	9.079E-04	3.928E-04	1.416E+01	1.804E-01	1.910E-01	1.077E-02		1.479E-03	1.505E-03	7.529E-03	2.264E-02	1.094E-03	1.976E-03	1.380E+01	4.485E-02	4.898E-02	8.331E-03
FBgn0002607	Hrb98DE	protein_coding	3R:24425555-24431499	9.573E-05	4.894E-04	2.475E-01	3.030E-01	2.177E-04	0.000E+00	1.398E+01	6.447E-01	6.505E-01	Inf		1.196E-03	8.227E-04	1.292E-03	7.347E-03	1.618E-03	1.404E-03	1.365E+01	1.364E-02	1.584E-02	9.476E-03
FBgn0002609	Hsc70-1	protein_coding	3L:13967160-13970861	1.851E-01	8.363E-02	1.103E-04	4.371E-03	2.464E-03	1.884E-01	7.681E+00	5.482E-08	1.851E-07	1.094E-02		Not expressed in males	-	-	-	-	-	-	-	-	-
FBgn0002622	Hsc70-2	protein_coding	3R:8870480-8873110	2.986E-04	5.604E-04	5.447E-02	1.133E-01	5.930E-04	1.088E-03	1.382E+01	2.549E-02	3.002E-02	3.055E-03		1.921E-03	1.773E-03	5.242E-03	1.785E-02	1.206E-03	1.766E-03	1.337E+01	1.026E-02	1.211E-02	1.211E-02
FBgn0002626	Hsc70-3	protein_coding	X:11695728-11701150	1.095E-04	6.609E-04	2.682E-01	3.222E-01	1.844E-04	3.256E-04	1.390E+01	1.204E-01	1.302E-01	3.743E-03		1.071E-03	1.684E-03	3.422E-02	6.419E-02	7.083E-04	1.246E-03	1.355E+01	1.902E-03	2.484E-03	9.568E-03
FBgn0002638	Hsc70-5	protein_coding	2R:10140102-10143697	4.649E-03	1.338E-02	9.272E-02	1.544E-01	3.866E-04	1.730E-02	1.123E+01	7.745E-04	1.145E-03	2.990E-03		1.321E-03	1.237E-02	3.555E-01	3.938E-01	1.189E-04	3.421E-02	7.985E+00	1.156E-03	1.556E-03	4.299E-04
FBgn0002641	Hsf	protein_coding	2R:14017807-14022139	1.190E-02	2.913E-02	9.375E-02	1.555E-01	4.547E-04	7.878E-02	6.640E+00	2.579E-06	6.089E-06	1.681E-03		4.178E-02	3.056E-02	1.768E-03	8.834E-03	1.522E-03	2.079E-01	5.589E+00	4.109E-11	2.354E-10	2.237E-03
FBgn0002645	Hsp22	protein_coding	3L:9366030-9368064	2.315E-01	2.529E-01	9.801E-03	4.927E-02	1.019E-03	1.133E-15	6.089E+00	5.327E-01	5.409E-01	2.274E+12		2.283E-02	1.535E-01	3.002E-01	3.423E-01	1.656E-04	3.819E-02	5.395E+00	1.671E-01	1.728E-01	6.654E-03
FBgn0002673	Hsp23	protein_coding	3L:9374981-9375865	6.295E-02	1.237E-01	5.136E-02	1.102E-01	5.665E-04	2.948E-01	7.964E+00	1.937E-05	3.829E-05	2.377E-03		2.073E-02	2.989E-02	2.327E-02	4.925E-02	7.719E-04	9.765E-02	7.259E+00	6.787E-04	9.501E-04	2.363E-03
FBgn0002707	Hsp26	protein_coding	3L:9369517-9370527	1.188E-02	4.127E-02	1.653E-01	2.268E-01	3.204E-04	6.886E-02	6.466E+00	4.108E-05	7.649E-05	1.920E-03		Not expressed in males	-	-	-	-	-	-	-	-	-
FBgn0002715	Hsp27	protein_coding	3L:9377162-9378794	0.000E+00	1.379E-01	7.074E-01	7.227E-01	0.000E+00	2.546E-01	6.597E+00	2.240E-08	8.202E-08	0.000E+00		0.000E+00	2.183E-02	5.904E-01	6.131E-01	0.000E+00	6.919E-02	8.272E+00	2.767E-05	4.801E-05	0.000E+00
FBgn0002719	Hsp67Ba	protein_coding	3L:9370901-9372634	1.328E-02	1.557E-02	1.265E-02	5.566E-02	9.494E-04	9.201E-02	1.194E+01	1.296E-10	8.305E-10	1.606E-03		2.119E-03	7.968E-03	1.422E-01	1.872E-01	2.961E-04	5.287E-02	1.227E+01	9.244E-11	4.935E-10	4.462E-04
FBgn0002733	Hsp67Bb	protein_coding	3L:9365821-9368064	3.661E-02	4.812E-02	1.901E-02	6.770E-02	8.469E-04	1.709E-01	5.790E+00	2.704E-08	9.719E-08	2.385E-03		1.210E-02	1.249E-02	7.409E-03	2.236E-02	1.078E-03	3.712E-02	4.594E+00	8.861E-04	1.216E-03	3.627E-03
FBgn0002736	Hsp67Bc	protein_coding	3L:9364610-9365597	7.727E-03	1.789E-02	7.802E-02	1.391E-01	4.807E-04	1.084E-02	9.740E+00	7.031E-02	7.822E-02	7.935E-03		1.882E-03	1.850E-02	3.684E-01	4.063E-01	1.132E-04	8.552E-03	7.551E+00	1.644E-01	1.702E-01	2.450E-03
FBgn0002772	Hsp68	protein_coding	3R:19880801-19883032	1.879E-02	2.993E-02	3.375E-02	8.862E-02	6.989E-04	5.385E-02	1.309E+01	3.253E-10	1.853E-09	3.885E-03		5.142E-03	4.917E-03	5.964E-03	1.944E-02	1.164E-03	2.158E-02	1.350E+01	1.696E-10	8.545E-10	2.652E-03
FBgn0002773	Hsp83	protein_coding	3L:3192968-3197059	4.262E-02	8.078E-02	5.312E-02	1.120E-01	5.873E-04	1.912E-01	1.177E+01	3.722E-15	8.639E-14	2.481E-03		8.141E-03	1.572E-02	4.740E-02	8.141E-02	5.763E-04	8.688E-02	1.226E+01	3.550E-16	8.113E-15	1.043E-03
FBgn0002774	Hsromega	ncRNA	3R:17121848-17143558	7.847E-03	4.339E-02	2.629E-01	3.170E-01	2.013E-04	1.001E-01	5.171E+00	6.623E-03	8.503E-03	8.724E-04		2.492E-02	4.032E-02	3.682E-02	6.771E-02	6.880E-04	1.213E-02	4.775E+00	4.128E-01	4.163E-01	2.286E-02
FBgn0002775	hth	protein_coding	3R:6333282-6465290	4.526E-02	1.302E-01	1.111E-01	1.731E-01	3.869E-04	4.249E-01	4.000E+00	1.006E-09	5.084E-09	1.186E-03		1.604E-02	2.097E-02	1.671E-02	3.860E-02	8.517E-04	3.890E-02	3.623E+00	8.797E-04	1.208E-03	4.590E-03
FBgn0002778	Ide	protein_coding	3L:20364771-20368996	1.173E-02	1.168E-02	5.905E-03	3.919E-02	1.118E-03	9.196E-02	9.413E+00	4.734E-08	1.627E-07	1.420E-03		5.105E-02	4.226E-02	3.010E-03	1.232E-02	1.345E-03	8.537E-02	6.348E+00	2.927E-07	7.153E-07	6.656E-03
FBgn0002780	Idh	protein_coding	3L:8349503-8354006	2.530E-03	2.262E-03	4.084E-03	3.216E-02	1.245E-03	1.084E-02	1.225E+01	3.540E-09	1.567E-08	2.597E-03		3.509E-03	6.889E-03	6.010E-02	9.667E-02	5.670E-04	1.199E-02	9.928E+00	5.459E-03	6.691E-03	3.257E-03
FBgn0002783	if	protein_coding	X:16646221-16677467	7.572E-03	1.280E-02	4.138E-02	9.794E-02	6.587E-04	2.886E-02	1.030E+01	8.921E-04	1.309E-03	2.920E-03		4.471E-03	1.507E-02	1.585E-01	2.035E-01	3.303E-04	1.076E-02	8.515E+00	9.543E-02	1.009E-01	4.624E-03
FBgn0002787	ImpE1	protein_coding	3L:8365504-8384271	5.997E-04	6.292E-03	3.705E-01	4.152E-01	1.061E-04	7.156E-03	1.019E+01	9.851E-04	1.434E-03	9.329E-04		2.197E-03	3.512E-03	3.320E-02	6.293E-02	6.962E-04	1.132E-02	9.837E+00	8.976E-06	1.687E-05	2.160E-03
FBgn0002789	ImpE2	protein_coding	3L:3510973-3512681	2.502E-02	5.533E-02	6.299E-02	1.231E-01	5.033E-04	5.159E-02	1.132E+01	4.802E-06	1.070E-05	5.397E-03		2.754E-03	9.276E-03	1.584E-01	2.034E-01	3.305E-04	2.115E-02	1.159E+01	1.238E-04	1.949E-04	1.450E-03
FBgn0002791	ImpE3	protein_coding	3R:3854174-3855268	1.053E-02	2.113E-02	5.681E-02	1.159E-01	5.551E-04	5.726E-02	7.322E+00	1.505E-04	2.522E-04	2.048E-03		8.881E-03	2.916E-02	1.530E-01	1.980E-01	3.390E-04	8.571E-02	6.461E+00	1.157E-06	2.531E-06	1.153E-03
FBgn0002868	ImpL1	protein_coding	3L:13375864-13377099	3.708E-03	4.146E-03	1.113E-02	5.246E-02	9.954E-04	3.675E-02	1.377E+01	8.795E-16	2.446E-14	1.123E-03		1.981E-03	1.188E-03	6.257E-04	4.903E-03	1.856E-03	3.155E-02	1.405E+01	2.116E-16	5.249E-15	6.987E-04
FBgn0002869	ImpL2	protein_coding	3L:4224005-4236147	1.984E-01	3.638E-01	4.850E-02	1.070E-01	6.072E-04	1.975E+00	4.918E+00	2.731E-14	5.089E-13	1.118E-03		4.815E-01	1.810E-01	3.409E-05	1.138E-03	2.960E-03	1.933E+00	4.464E+00	6.478E-19	3.537E-17	2.772E-03
FBgn0002872	ImpL3	protein_coding	3L:6252204-6255794	7.244E-03	2.020E-02	1.156E-01	1.779E-01	3.992E-04	1.142E-01	8.076E+00	1.385E-03	1.972E-03	7.062E-04		5.415E-03	2.040E-02	1.802E-01	2.257E-01	2.954E-04	4.885E-02	3.582E+00	8.346E-06	1.580E-05	1.234E-03
FBgn0002878	in	protein_coding	3L:20360297-20363359	1.127E-02	3.824E-02	1.487E-01	2.108E-01	3.281E-04	1.748E-01	7.581E+00	1.634E-04	2.719E-04	7.181E-04		3.232E-03	2.181E-01	4.902E-01	5.198E-01	1.650E-05	0.000E+00	3.385E+00	9.201E-01	9.202E-01	Inf
FBgn0002887	inaD	protein_coding	2R:18743210-18746317	2.171E-02	5.839E-02	8.336E-02	1.448E-01	4.139E-04	9.012E-02	6.743E+00	5.039E-03	6.581E-03	2.682E-03		1.850E-02	2.750E-02	2.323E-02	4.922E-02	7.491E-04	1.157E-01	4.766E+00	7.825E-08	2.160E-07	1.780E-03
FBgn0002891	inv	protein_coding	2R:7361969-7397200	0.000E+00	5.745E-02	6.082E-01	6.316E-01	0.000E+00	9.865E-02	6.012E+00	1.491E-02	1.813E-02	0.000E+00		3.258E-19	2.921E-02	5.333E-01	5.602E-01	1.241E-20	2.509E-02	3.921E+00	4.836E-03	5.974E-03	1.445E-19
FBgn0002899	ix	protein_coding	2R:7246941-7247668	1.023E-01	1.998E-01	5.350E-02	1.123E-01	5.702E-04	3.948E-01	5.596E+00	6.268E-11	4.412E-10	2.886E-03		Not expressed in males	-	-	-	-	-	-	-	-	-
FBgn0002901	janA	protein_coding	3R:25864343-25865255	2.674E-02	6.495E-02	9.382E-02	1.555E-01	4.582E-04	6.778E-02	6.928E+00	3.098E-03	4.178E-03	4.391E-03		0.000E+00	3.188E-02	6.187E-01	6.395E-01	0.000E+00	3.566E-02	4.864E+00	3.282E-03	4.153E-03	0.000E+00
FBgn0002905	janB	protein_coding	3R:25863705-25864450	3.123E-02	7.094E-02	7.934E-02	1.405E-01	4.900E-04	1.039E-01	5.014E+00	4.488E-04	6.915E-04	3.346E-03		Not expressed in males	-	-	-	-	-	-	-	-	-
FBgn0002906	Jon44E	protein_coding	2R:4578952-4580349	1.056E-02	2.959E-02	9.556E-02	1.573E-01	3.971E-04	2.868E-02	1.050E+01	1.702E-05	3.391E-05	4.098E-03		2.461E-02	1.852E-02	2.029E-03	9.603E-03	1.479E-03	7.961E-02	9.727E+00	3.381E-06	6.865E-06	3.441E-03
FBgn0002909	Jra	protein_coding	2R:5983984-5986061	5.370E-03	8.062E-02	3.323E-01	3.809E-01	7.414E-05	7.249E-02	5.123E+00	1.005E-06	2.563E-06	8.245E-04		Not expressed in males	-	-	-	-	-	-	-	-	-
FBgn0002914	kar	protein_coding	3R:8507907-8515089	1.144E-03	1.057E-02	2.593E-01	3.134E-01	1.205E-04	4.429E-03	9.007E+00	3.883E-02	4.472E-02	2.875E-03		1.268E-02	6.472E-03	2.523E-04	2.975E-03	2.181E-03	8.192E-03	8.354E+00	4.762E-02	5.188E-02	1.723E-02
FBgn0002921	kay	protein_coding	3R:25591716-25619835	2.498E-03	1.029E-02	2.024E-01	2.613E-01	2.703E-04	1.838E-03	1.118E+01	2.576E-01	2.682E-01	1.513E-02		2.075E-03	6.119E-03	1.313E-01	1.760E-01	3.775E-04	2.627E-03	1.136E+01	1.285E-01	1.343E-01	8.792E-03
FBgn0002924	kel	protein_coding	2L:18129883-18138083	7.630E-03	2.043E-02	1.119E-01	1.739E-01	4.157E-04	1.429E-01	8.361E+00	4.469E-08	1.542E-07	5.944E-04		7.056E-03	5.332E-02	3.243E-01	3.657E-01	1.473E-04	1.485E-01	4.992E+00	1.667E-07	4.297E-07	5.290E-04
FBgn0002926	Khc	protein_coding	2R:12154464-12159476	6.628E-02	4.430E-02	1.091E-03	1.673E-02	1.666E-03	3.440E-01	6.837E+00	3.750E-04	5.845E-04	2.144E-03		Not expressed in males	-	-	-	-	-	-	-	-	-
FBgn0002930	kkv	protein_coding	3R:1203814-1218588	2.028E-02	2.244E-02	1.027E-02	5.040E-02	1.006E-03	8.708E-02	1.010E+01	7.168E-08	2.363E-07	2.592E-03		1.491E-02	1.049E-02	1.400E-03	7.706E-03	1.583E-03	4.048E-02	1.062E+01	6.927E-09	2.366E-08	4.100E-03
FBgn0002932	kl-2	protein_coding	YHet:81208-148249	2.597E-02	4.104E-02	3.339E-02	8.824E-02	7.042E-04	5.660E-02	6.811E+00	6.206E-02	6.952E-02	5.107E-03		2.110E-01	1.269E-01	6.315E-04	4.907E-03	1.851E-03	2.138E-02	4.191E+00	1.083E-01	1.140E-01	1.098E-01
FBgn0002936	kl-3	protein_coding	YHet:34289-65839	1.053E-02	4.385E-02	1.674E-01	2.287E-01	2.673E-04	2.182E-01	6.068E+00	1.290E-09	6.348E-09	5.370E-04		1.018E-02	1.781E-02	4.600E-02	7.975E-02	6.361E-04	1.358E-01	7.725E+00	3.285E-10	1.540E-09	8.341E-04
FBgn0002937	kl-5	protein_coding	YHet:310-33413	4.184E-02	9.284E-02	7.571E-02	1.371E-01	5.017E-04	1.591E-01	4.452E+00	3.070E-13	4.285E-12	2.928E-03		4.488E-02	1.224E-02	2.936E-06	3.185E-04	4.083E-03	2.043E-01	6.061E+00	3.790E-11	2.199E-10	2.445E-03
FBgn0002939	klar	protein_coding	3L:434082-540614	5.249E-01	4.987E-01	5.925E-03	3.919E-02	1.172E-03	1.443E+00	9.125E+00	2.769E-17	1.218E-15	4.050E-03		4.477E-01	3.615E-01	2.829E-03	1.182E-02	1.378E-03	9.258E-01	1.007E+01	1.193E-20	1.169E-18	5.383E-03
FBgn0002940	kn	protein_coding	2R:10660154-10694566	3.275E-03	5.579E-03	4.119E-02	9.779E-02	6.534E-04	8.011E-03	1.356E+01	3.932E-04	6.113E-04	4.551E-03		4.003E-04	1.652E-03	1.986E-01	2.444E-01	2.697E-04	3.852E-03	1.377E+01	1.660E-03	2.183E-03	1.157E-03
FBgn0002945	kni	protein_coding	3L:20685429-20688478	5.635E-02	6.364E-02	1.174E-02	5.365E-02	9.856E-04	1.239E-01	4.123E+00	1.540E-04	2.572E-04	5.064E-03		9.296E-16	5.926E-02	5.854E-01	6.085E-01	1.746E-17	2.537E-02	4.274E+00	7.299E-03	8.781E-03	4.079E-16
FBgn0002948	knk	protein_coding	3R:5948086-5951386	3.012E-02	6.052E-02	5.167E-02	1.107E-01	5.540E-04	1.322E-01	9.240E+00	1.855E-12	2.067E-11	2.537E-03		Not expressed in males	-	-	-	-	-	-	-	-	-
FBgn0002962	knrl	protein_coding	3L:20590240-20613759	2.200E-02	3.155E-02	2.495E-02	7.613E-02	7.762E-04	7.424E-02	1.109E+01	4.258E-09	1.843E-08	3.299E-03		Not expressed in males	-	-	-	-	-	-	-	-	-
FBgn0002985	kto	protein_coding	3L:19829713-19838044	4.767E-01	1.885E-01	4.526E-05	2.718E-03	2.815E-03	3.446E-01	6.511E+00	6.484E-08	2.157E-07	1.540E-02		3.183E-01	9.680E-02	7.584E-06	5.638E-04	3.660E-03	2.326E-01	7.241E+00	1.443E-04	2.251E-04	1.523E-02
FBgn0002989	Kr	protein_coding	2R:21114133-21118917	6.041E-03	3.976E-02	2.730E-01	3.265E-01	1.691E-04	4.136E-02	6.434E+00	7.489E-02	8.301E-02	1.626E-03		Not expressed in males	-	-	-	-	-	-	-	-	-
FBgn0003008	kz	protein_coding	X:2131890-2136068	1.095E-03	6.368E-03	2.752E-01	3.287E-01	1.914E-04	2.645E-02	8.779E+00	5.383E-05	9.777E-05	4.608E-04		2.428E-04	6.160E-03	4.626E-01	4.944E-01	4.387E-05	6.194E-02	7.725E+00	2.380E-05	4.169E-05	4.364E-05
FBgn0003015	L	protein_coding	2R:10368691-10384817	4.348E-03	4.546E-03	8.206E-03	4.519E-02	1.065E-03	1.028E-02	1.174E+01	1.968E-03	2.732E-03	4.710E-03		Not expressed in males	-	-	-	-	-	-	-	-	-
FBgn0003016	l(1)1Bi	protein_coding	X:523805-527666	8.176E-04	7.941E-03	3.639E-01	4.089E-01	1.146E-04	1.152E-02	8.304E+00	7.648E-02	8.473E-02	7.898E-04		4.440E-04	1.634E-02	3.890E-01	4.255E-01	3.024E-05	6.405E-02	6.781E+00	3.151E-02	3.492E-02	7.717E-05
FBgn0003023	egh	protein_coding	X:2482535-2493144	6.119E-03	1.515E-02	8.990E-02	1.514E-01	4.497E-04	4.409E-02	1.075E+01	1.662E-06	4.062E-06	1.545E-03		Not expressed in males	-	-	-	-	-	-	-	-	-
FBgn0003028	l(1)10Bb	protein_coding	X:11218326-11219341	5.519E-03	1.406E-02	1.001E-01	1.622E-01	4.368E-04	3.085E-02	1.036E+01	8.867E-04	1.301E-03	1.991E-03		3.102E-02	2.376E-02	2.220E-03	1.019E-02	1.454E-03	3.548E-02	4.488E+00	3.608E-05	6.143E-05	9.732E-03
FBgn0003041	Hlc	protein_coding	X:21256544-21258973	4.295E-03	9.350E-03	6.760E-02	1.280E-01	5.113E-04	6.353E-02	1.011E+01	2.121E-09	9.786E-09	7.526E-04		2.285E-02	1.557E-02	1.203E-03	7.041E-03	1.633E-03	1.658E-01	7.184E+00	1.678E-08	5.305E-08	1.534E-03
FBgn0003042	Grip91	protein_coding	X:13630602-13638716	6.916E-03	1.945E-02	9.606E-02	1.578E-01	3.958E-04	4.759E-02	8.165E+00	1.564E-08	5.910E-08	1.617E-03		7.047E-03	1.119E-02	3.551E-02	6.600E-02	7.012E-04	4.097E-02	5.155E+00	1.264E-05	2.322E-05	1.915E-03
FBgn0003044	dlg1	protein_coding	X:11263697-11303809	1.551E-02	1.768E-02	1.156E-02	5.329E-02	9.766E-04	7.056E-02	8.883E+00	7.819E-06	1.670E-05	2.447E-03		1.443E-02	3.166E-02	7.567E-02	1.150E-01	5.075E-04	1.039E-02	5.291E+00	1.041E-01	1.097E-01	1.546E-02
FBgn0003046	ifc	protein_coding	2L:5986347-5988854	3.346E-02	1.067E-01	1.367E-01	1.993E-01	3.491E-04	4.612E-01	5.629E+00	2.569E-12	2.722E-11	8.076E-04		Not expressed in males	-	-	-	-	-	-	-	-	-
FBgn0003048	eIF-4a	protein_coding	2L:5981763-5985909	1.664E-02	4.687E-02	1.046E-01	1.668E-01	3.952E-04	5.782E-02	6.965E+00	1.549E-01	1.653E-01	3.204E-03		1.351E-02	2.153E-02	2.965E-02	5.790E-02	6.984E-04	4.293E-02	4.446E+00	1.008E-02	1.191E-02	3.502E-03
FBgn0003053	Arpc1	protein_coding	2L:13827940-13829741	3.041E-02	1.452E-02	1.590E-04	5.520E-03	2.331E-03	9.457E-02	7.460E+00	7.814E-03	9.919E-03	3.579E-03		2.600E-02	1.826E-02	1.436E-03	7.782E-03	1.585E-03	8.461E-02	6.040E+00	2.327E-02	2.623E-02	3.420E-03
FBgn0003062	Sos	protein_coding	2L:13813815-13819826	1.492E-02	5.256E-03	2.024E-05	1.910E-03	3.160E-03	1.844E-02	1.099E+01	4.318E-04	6.666E-04	9.007E-03		1.564E-02	1.548E-02	7.016E-03	2.156E-02	1.125E-03	3.377E-02	6.636E+00	1.892E-02	2.156E-02	5.156E-03
FBgn0003068	NimC3	protein_coding	2L:14019356-14020208	7.726E-05	4.107E-02	5.322E-01	5.627E-01	2.094E-06	1.378E-01	5.473E+00	9.180E-05	1.595E-04	6.239E-06		1.853E-03	2.183E-02	3.882E-01	4.249E-01	9.448E-05	1.106E-01	6.183E+00	1.515E-04	2.354E-04	1.864E-04
FBgn0003071	Pgant35A	protein_coding	2L:14359251-14361411	2.530E-02	3.029E-02	1.418E-02	5.856E-02	9.297E-04	7.870E-02	1.056E+01	1.671E-06	4.082E-06	3.578E-03		1.260E-02	5.487E-03	8.676E-05	1.718E-03	2.555E-03	3.340E-02	1.157E+01	2.641E-04	3.939E-04	4.197E-03
FBgn0003074	l(2)35Bd	protein_coding	2L:15009938-15011764	8.041E-03	1.412E-02	4.303E-02	1.001E-01	6.341E-04	2.231E-02	1.210E+01	5.616E-13	7.166E-12	4.012E-03		4.320E-03	2.286E-03	2.983E-04	3.245E-03	2.103E-03	1.847E-02	1.258E+01	4.199E-10	1.902E-09	2.604E-03
FBgn0003076	CIAPIN1	protein_coding	2L:15036292-15038861	4.863E-03	6.443E-03	1.950E-02	6.822E-02	8.402E-04	3.653E-02	1.174E+01	3.687E-13	5.027E-12	1.482E-03		5.057E-03	7.965E-03	3.131E-02	6.036E-02	7.068E-04	2.858E-02	1.192E+01	4.144E-13	3.980E-12	1.970E-03
FBgn0003079	stc	protein_coding	2L:15113479-15118069	7.918E-03	7.894E-03	7.240E-03	4.294E-02	1.117E-03	3.464E-02	8.445E+00	1.031E-05	2.147E-05	2.545E-03		7.309E-03	1.709E-02	8.806E-02	1.287E-01	4.761E-04	2.692E-02	5.699E+00	1.288E-03	1.725E-03	3.022E-03
FBgn0003082	esg	protein_coding	2L:15333865-15336138	1.932E-02	2.664E-02	2.128E-02	7.100E-02	8.072E-04	1.314E-01	7.404E+00	8.069E-11	5.530E-10	1.636E-03		Not expressed in males	-	-	-	-	-	-	-	-	-
FBgn0003087	wor	protein_coding	2L:15423296-15425580	7.968E-02	9.185E-02	1.191E-02	5.405E-02	9.657E-04	4.036E-01	9.619E+00	1.916E-09	8.965E-09	2.197E-03		1.938E-02	2.788E-02	2.123E-02	4.609E-02	7.735E-04	1.331E-01	7.361E+00	6.263E-06	1.208E-05	1.620E-03
FBgn0003091	l(2)35Df	protein_coding	2L:15752262-15755900	1.501E-02	3.237E-02	7.350E-02	1.347E-01	5.161E-04	2.182E-02	5.134E+00	4.392E-02	5.028E-02	7.655E-03		1.282E-02	1.879E-02	2.557E-02	5.234E-02	7.592E-04	4.982E-02	5.642E+00	3.310E-03	4.187E-03	2.864E-03
FBgn0003093	Gli	protein_coding	2L:15756001-15762758	2.064E-02	1.866E-02	4.662E-03	3.419E-02	1.231E-03	4.683E-02	6.688E+00	1.844E-02	2.215E-02	4.905E-03		7.773E-03	5.795E-03	1.926E-03	9.244E-03	1.493E-03	6.123E-02	6.743E+00	9.575E-04	1.306E-03	1.413E-03
FBgn0003114	l(2)35Di	protein_coding	2L:15749318-15751078	5.412E-03	2.888E-02	2.444E-01	3.000E-01	2.086E-04	1.198E-01	9.374E+00	9.231E-09	3.691E-08	5.028E-04		Not expressed in males	-	-	-	-	-	-	-	-	-
FBgn0003116	wek	protein_coding	2L:15766132-15768349	4.576E-03	1.014E-02	7.556E-02	1.369E-01	5.021E-04	1.373E-02	7.746E+00	7.288E-05	1.286E-04	3.711E-03		2.339E-04	1.201E-02	4.470E-01	4.799E-01	2.169E-05	2.528E-02	7.039E+00	6.414E-05	1.051E-04	1.030E-04
FBgn0003117	Ca-alpha1D	protein_coding	2L:16165830-16190540	1.265E-03	3.427E-02	4.670E-01	5.024E-01	4.108E-05	3.991E-02	3.492E+00	6.335E-06	1.381E-05	3.527E-04		Not expressed in males	-	-	-	-	-	-	-	-	-
FBgn0003124	Cyp303a1	protein_coding	2L:16294182-16296969	1.810E-02	2.701E-02	2.775E-02	8.026E-02	7.459E-04	5.243E-02	1.099E+01	1.181E-09	5.862E-09	3.843E-03		2.457E-02	1.199E-02	1.815E-04	2.496E-03	2.281E-03	6.760E-02	8.650E+00	1.250E-06	2.718E-06	4.045E-03
FBgn0003134	crp	protein_coding	2L:16263555-16287730	6.678E-03	8.951E-03	2.130E-02	7.100E-02	8.305E-04	3.802E-02	9.045E+00	4.947E-02	5.614E-02	1.955E-03		4.993E-03	3.464E-02	3.072E-01	3.488E-01	1.604E-04	1.065E-02	8.852E+00	2.803E-01	2.852E-01	5.219E-03
FBgn0003137	mRpL4	protein_coding	2L:16328058-16329132	4.228E-03	1.886E-02	1.918E-01	2.518E-01	2.495E-04	5.181E-02	1.061E+01	1.251E-07	3.907E-07	9.083E-04		5.874E-03	3.674E-03	7.778E-04	5.536E-03	1.780E-03	1.140E-01	1.037E+01	2.161E-13	2.239E-12	5.733E-04
FBgn0003138	l(2)37Bb	protein_coding	2L:19049842-19051612	4.120E-02	6.594E-02	3.271E-02	8.750E-02	6.955E-04	6.562E-02	8.709E+00	1.474E-02	1.794E-02	6.989E-03		3.143E-02	2.341E-02	1.888E-03	9.147E-03	1.494E-03	3.576E-02	7.841E+00	3.451E-02	3.810E-02	9.782E-03
FBgn0003139	Catsup	protein_coding	2L:19041861-19043614	4.697E-03	5.763E-03	1.306E-02	5.646E-02	9.072E-04	1.140E-02	9.537E+00	9.560E-03	1.195E-02	4.585E-03		1.069E-02	1.467E-02	2.290E-02	4.873E-02	8.109E-04	1.014E-02	7.739E+00	3.401E-02	3.758E-02	1.174E-02
FBgn0003141	Lim3	protein_coding	2L:19079255-19108427	3.284E-04	3.006E-03	3.547E-01	4.006E-01	1.216E-04	1.628E-02	9.865E+00	5.444E-06	1.203E-05	2.245E-04		3.924E-03	1.037E-02	1.100E-01	1.528E-01	4.210E-04	7.214E-02	9.339E+00	4.089E-12	3.115E-11	6.054E-04
FBgn0003159	l(2)37Cc	protein_coding	2L:19121344-19123869	2.405E-02	1.233E-02	2.467E-04	7.056E-03	2.172E-03	3.773E-01	7.463E+00	1.702E-09	8.138E-09	7.094E-04		5.001E-03	1.366E-02	9.961E-02	1.414E-01	4.075E-04	4.352E-02	7.729E+00	7.214E-05	1.172E-04	1.279E-03
FBgn0003162	CG10561	protein_coding	2L:19114400-19116570	1.270E-02	1.796E-02	2.528E-02	7.653E-02	7.871E-04	7.117E-02	8.895E+00	9.505E-09	3.787E-08	1.986E-03		1.426E-02	1.271E-02	4.328E-03	1.567E-02	1.249E-03	5.940E-02	9.193E+00	2.174E-08	6.713E-08	2.673E-03
FBgn0003165	swm	protein_coding	2L:19493250-19497978	3.333E-03	1.498E-02	1.719E-01	2.326E-01	2.476E-04	6.105E-02	9.594E+00	3.115E-05	5.910E-05	6.078E-04		9.752E-02	2.386E-01	8.647E-02	1.270E-01	4.550E-04	3.563E-02	4.500E+00	1.004E-01	1.059E-01	3.047E-02
FBgn0003169	Aats-asp	protein_coding	2R:8764508-8770673	2.985E-03	8.629E-03	1.119E-01	1.740E-01	3.851E-04	2.736E-02	9.727E+00	2.265E-04	3.659E-04	1.214E-03		1.911E-02	2.469E-02	1.702E-02	3.912E-02	8.615E-04	1.707E-02	8.031E+00	5.545E-02	5.993E-02	1.246E-02
FBgn0003178	l(2)gl	protein_coding	2L:9838-21376	3.233E-03	8.109E-03	9.466E-02	1.562E-01	4.437E-04	1.137E-02	1.239E+01	4.839E-07	1.324E-06	3.164E-03		5.618E-03	4.575E-03	2.979E-03	1.222E-02	1.367E-03	5.497E-03	1.251E+01	1.982E-03	2.584E-03	1.138E-02
FBgn0003187	l(2)tid	protein_coding	2R:19594435-19596549	3.596E-02	4.714E-02	1.902E-02	6.770E-02	8.491E-04	1.796E-01	8.227E+00	2.113E-09	9.758E-09	2.228E-03		3.154E-03	5.741E-03	4.546E-02	7.905E-02	6.114E-04	4.438E-02	8.513E+00	6.686E-04	9.366E-04	7.911E-04
FBgn0003189	dre4	protein_coding	3L:1871573-1876312	2.559E-02	1.042E-02	5.672E-05	3.022E-03	2.734E-03	9.264E-02	8.992E+00	2.626E-06	6.192E-06	3.075E-03		7.803E-03	1.955E-02	9.840E-02	1.401E-01	4.442E-04	6.463E-02	5.617E+00	1.143E-04	1.806E-04	1.344E-03
FBgn0003204	l(3)73Ah	protein_coding	3L:16581574-16583232	1.434E-03	3.101E-03	5.002E-02	1.089E-01	5.148E-04	2.009E-02	1.079E+01	2.871E-04	4.557E-04	7.948E-04		5.815E-03	4.890E-03	3.446E-03	1.340E-02	1.324E-03	1.421E-02	9.089E+00	9.945E-03	1.176E-02	4.557E-03
FBgn0003205	Prosbeta6	protein_coding	3L:16602499-16603518	4.641E-03	7.616E-03	3.560E-02	9.062E-02	6.784E-04	7.029E-03	1.029E+01	7.101E-05	1.256E-04	7.349E-03		7.245E-03	5.787E-03	2.694E-03	1.150E-02	1.394E-03	1.132E-02	9.423E+00	6.608E-06	1.272E-05	7.121E-03
FBgn0003206	sas	protein_coding	3R:2988599-3009424	5.836E-17	2.816E-03	5.994E-01	6.232E-01	2.307E-17	8.161E-03	1.014E+01	3.984E-04	6.189E-04	7.960E-17		2.957E-03	7.697E-03	1.010E-01	1.427E-01	4.276E-04	2.447E-02	9.852E+00	1.188E-09	4.854E-09	1.345E-03
FBgn0003209	l(3)87Df	protein_coding	3R:8856634-8857320	1.964E-02	9.043E-03	1.320E-04	4.882E-03	2.418E-03	1.822E-02	9.902E+00	2.017E-04	3.286E-04	1.200E-02		5.474E-02	1.726E-02	1.253E-05	6.617E-04	3.531E-03	4.141E-02	9.707E+00	5.851E-11	3.258E-10	1.471E-02
FBgn0003218	dco	protein_coding	3R:26879806-26886932	1.918E-03	4.341E-02	3.819E-01	4.255E-01	4.918E-05	1.216E-01	5.432E+00	4.704E-04	7.217E-04	1.756E-04		Not expressed in males	-	-	-	-	-	-	-	-	-
FBgn0003231	hyd	protein_coding	3R:5540344-5551337	3.805E-03	3.044E-03	2.732E-03	2.591E-02	1.391E-03	3.147E-02	1.144E+01	6.939E-08	2.292E-07	1.346E-03		8.487E-03	5.845E-03	1.299E-03	7.373E-03	1.616E-03	2.386E-02	1.173E+01	4.198E-08	1.226E-07	3.960E-03
FBgn0003248	l(3)mbn	protein_coding	3L:6117033-6121907	3.564E-02	8.384E-02	8.300E-02	1.444E-01	4.732E-04	2.717E-01	8.693E+00	4.495E-10	2.453E-09	1.460E-03		3.508E-03	1.526E-02	2.052E-01	2.510E-01	2.558E-04	2.939E-01	9.446E+00	5.376E-12	3.942E-11	1.329E-04
FBgn0003249	l(3)mbt	protein_coding	3R:23092047-23098995	2.613E-02	2.342E-02	4.557E-03	3.380E-02	1.242E-03	2.165E-01	9.265E+00	1.105E-11	9.444E-11	1.344E-03		1.143E-03	8.323E-03	3.161E-01	3.576E-01	1.528E-04	1.205E-01	9.613E+00	7.940E-15	1.208E-13	1.055E-04
FBgn0003250	sti	protein_coding	3L:12501097-12507915	1.829E-02	2.648E-02	2.593E-02	7.750E-02	7.688E-04	3.232E-01	9.376E+00	4.108E-17	1.737E-15	6.298E-04		5.617E-03	2.365E-03	6.992E-05	1.571E-03	2.644E-03	1.569E-01	1.051E+01	5.132E-21	5.965E-19	3.984E-04
FBgn0003254	pho	protein_coding	4:1193094-1202254	2.227E-01	2.497E+00	3.831E-01	4.264E-01	9.930E-05	5.609E-01	3.459E+00	1.711E-05	3.408E-05	4.420E-03		Not expressed in males	-	-	-	-	-	-	-	-	-
FBgn0003257	lab	protein_coding	3R:2487148-2504312	1.305E-02	1.415E-02	9.639E-03	4.898E-02	1.026E-03	4.224E-02	9.735E+00	1.579E-07	4.825E-07	3.438E-03		1.213E-02	6.443E-02	2.565E-01	3.004E-01	2.095E-04	7.406E-02	5.378E+00	7.744E-07	1.752E-06	1.823E-03
FBgn0003261	lace	protein_coding	2L:15499126-15505018	3.417E-03	4.334E-03	1.730E-02	6.452E-02	8.775E-04	8.602E-03	1.260E+01	2.990E-04	4.733E-04	4.421E-03		3.676E-03	4.097E-03	1.108E-02	2.908E-02	9.987E-04	1.336E-02	1.156E+01	4.169E-03	5.202E-03	3.063E-03
FBgn0003268	Lam	protein_coding	2L:5542479-5546642	3.277E-02	9.873E-02	1.260E-01	1.883E-01	3.695E-04	1.954E-01	6.079E+00	4.750E-06	1.059E-05	1.867E-03		Not expressed in males	-	-	-	-	-	-	-	-	-
FBgn0003274	LanA	protein_coding	3L:6196930-6211122	1.312E-04	9.423E-04	3.145E-01	3.645E-01	1.549E-04	6.668E-04	1.381E+01	1.189E-01	1.287E-01	2.190E-03		5.360E-04	1.466E-03	1.084E-01	1.511E-01	4.070E-04	2.914E-03	1.353E+01	1.279E-03	1.714E-03	2.048E-03
FBgn0003275	Lcp1	protein_coding	2R:4317619-4318748	2.778E-16	6.707E-03	6.432E-01	6.641E-01	4.610E-17	1.282E-02	9.366E+00	4.365E-03	5.757E-03	2.412E-16		1.977E-03	6.102E-03	1.403E-01	1.850E-01	3.606E-04	2.355E-02	9.460E+00	5.103E-05	8.506E-05	9.342E-04
FBgn0003277	Lcp2	protein_coding	2R:4321301-4322290	3.884E-04	8.229E-03	4.382E-01	4.759E-01	5.254E-05	1.964E-02	1.054E+01	2.837E-04	4.509E-04	2.201E-04		2.388E-03	1.566E-02	2.909E-01	3.332E-01	1.697E-04	8.927E-03	8.789E+00	2.393E-01	2.446E-01	2.977E-03
FBgn0003278	Lcp3	protein_coding	2R:4322814-4323600	2.015E-02	1.306E-02	9.429E-04	1.527E-02	1.717E-03	8.280E-02	7.574E+00	2.951E-07	8.520E-07	2.709E-03		Not expressed in males	-	-	-	-	-	-	-	-	-
FBgn0003285	Lcp4	protein_coding	2R:4325151-4326000	3.231E-02	1.681E-01	2.520E-01	3.073E-01	2.140E-04	2.339E+00	5.851E+00	2.034E-18	1.241E-16	1.538E-04		0.000E+00	8.143E-02	5.101E-01	5.384E-01	0.000E+00	5.991E-02	4.005E+00	3.273E-04	4.814E-04	0.000E+00
FBgn0003292	lds	protein_coding	3R:3746152-3750213	4.238E-02	9.346E-02	7.764E-02	1.387E-01	5.048E-04	1.436E+00	5.816E+00	3.970E-18	2.225E-16	3.284E-04		Not expressed in males	-	-	-	-	-	-	-	-	-
FBgn0003302	lea	protein_coding	2L:1380085-1420453	1.183E-02	5.141E-02	2.138E-01	2.721E-01	2.561E-04	5.612E-02	7.851E+00	7.018E-06	1.513E-05	2.346E-03		3.834E-03	4.820E-03	1.712E-02	3.925E-02	8.855E-04	2.881E-02	9.082E+00	8.036E-04	1.110E-03	1.482E-03
FBgn0003308	lin	protein_coding	2R:4802028-4805739	1.211E-02	3.945E-02	1.481E-01	2.100E-01	3.417E-04	2.801E-01	4.195E+00	1.136E-08	4.425E-08	4.813E-04		6.243E-02	5.269E-02	3.321E-03	1.309E-02	1.319E-03	2.896E-01	4.796E+00	1.021E-05	1.904E-05	2.399E-03
FBgn0003313	l(1)sc	protein_coding	X:303753-304850	5.493E-01	8.471E-01	3.253E-02	8.740E-02	7.218E-04	2.655E+00	4.730E+00	6.896E-05	1.223E-04	2.303E-03		Not expressed in males	-	-	-	-	-	-	-	-	-
FBgn0003317	Lsp1alpha	protein_coding	X:12384323-12387015	8.092E-04	7.084E-03	3.246E-01	3.738E-01	1.272E-04	1.779E-02	9.901E+00	9.443E-06	1.983E-05	5.065E-04		7.805E-03	6.695E-03	3.774E-03	1.424E-02	1.298E-03	1.705E-02	8.782E+00	7.201E-04	1.004E-03	5.096E-03
FBgn0003321	Lsp1beta	protein_coding	2L:898499-901316	7.079E-03	3.966E-03	4.167E-04	9.191E-03	1.987E-03	3.650E-03	9.494E+00	1.509E-01	1.612E-01	2.159E-02		4.493E-03	2.825E-03	7.999E-04	5.595E-03	1.770E-03	3.331E-02	8.537E+00	1.848E-06	3.912E-06	1.501E-03
FBgn0003328	Lsp1gamma	protein_coding	3L:66429-68995	6.676E-03	3.911E-02	2.693E-01	3.231E-01	1.900E-04	1.646E-01	8.080E+00	5.525E-07	1.491E-06	4.514E-04		2.622E-02	4.299E-02	3.606E-02	6.675E-02	6.789E-04	8.328E-02	7.643E+00	2.017E-06	4.242E-06	3.504E-03
FBgn0003330	Lsp2	protein_coding	3L:12122492-12124969	1.322E-02	2.763E-02	6.910E-02	1.299E-01	5.325E-04	1.003E-01	8.227E+00	1.434E-06	3.557E-06	1.467E-03		0.000E+00	1.561E-02	8.863E-01	8.907E-01	0.000E+00	3.947E-03	5.200E+00	1.740E-01	1.798E-01	0.000E+00
FBgn0003334	lt	protein_coding	2L:22817526-22835867	1.829E-02	2.120E-02	1.125E-02	5.279E-02	9.605E-04	1.680E-02	9.010E+00	6.616E-02	7.384E-02	1.212E-02		1.327E-02	1.129E-02	3.639E-03	1.389E-02	1.308E-03	3.052E-02	7.264E+00	1.788E-02	2.045E-02	4.839E-03
FBgn0003345	ltd	protein_coding	2R:5065368-5073847	3.852E-03	1.598E-02	1.585E-01	2.203E-01	2.684E-04	4.178E-02	8.311E+00	3.470E-05	6.529E-05	1.026E-03		1.787E-03	6.312E-03	1.688E-01	2.140E-01	3.151E-04	4.997E-02	7.879E+00	6.792E-03	8.225E-03	3.980E-04
FBgn0003346	Mal-A2	protein_coding	2R:4341131-4343287	2.698E-03	1.919E-02	2.572E-01	3.117E-01	1.565E-04	1.887E-02	9.270E+00	9.447E-06	1.984E-05	1.591E-03		6.660E-03	1.470E-02	7.744E-02	1.168E-01	5.044E-04	4.877E-01	6.819E+00	2.226E-12	1.800E-11	1.520E-04
FBgn0003353	Mal-A1	protein_coding	2R:4337168-4339409	1.043E-02	2.246E-02	6.614E-02	1.263E-01	5.168E-04	8.689E-02	5.542E+00	7.289E-05	1.286E-04	1.336E-03		1.590E-03	2.313E-02	3.589E-01	3.972E-01	7.655E-05	6.363E-02	4.599E+00	1.833E-07	4.690E-07	2.782E-04
FBgn0003358	Mal-A3	protein_coding	2R:4343413-4345397	1.404E-01	4.572E-02	1.317E-05	1.465E-03	3.417E-03	1.986E+00	1.039E+01	3.131E-22	7.896E-20	7.866E-04		1.294E-01	1.014E-01	2.407E-03	1.072E-02	1.421E-03	1.450E+00	1.099E+01	1.057E-25	6.614E-23	9.940E-04
FBgn0003360	sens	protein_coding	3L:13389327-13394225	7.229E-03	4.890E-03	1.183E-03	1.761E-02	1.645E-03	7.708E-03	1.377E+01	1.174E-03	1.691E-03	1.044E-02		7.318E-03	9.296E-03	1.787E-02	4.055E-02	8.762E-04	5.524E-03	1.391E+01	7.548E-04	1.048E-03	1.475E-02
FBgn0003366	lz	protein_coding	X:9178681-9197669	9.379E-03	1.518E-02	3.686E-02	9.234E-02	6.877E-04	4.959E-02	3.960E+00	5.615E-03	7.289E-03	2.105E-03		9.158E-03	9.023E-03	6.569E-03	2.065E-02	1.130E-03	1.799E-02	4.660E+00	1.003E-02	1.186E-02	5.668E-03
FBgn0003375	m	protein_coding	X:11648305-11663541	1.196E-02	2.526E-02	7.058E-02	1.314E-01	5.273E-04	3.254E-03	4.011E+00	3.424E-01	3.530E-01	4.093E-02		Not expressed in males	-	-	-	-	-	-	-	-	-
FBgn0003390	Kaz-m1	protein_coding	3R:21840442-21842209	9.238E-02	1.672E-01	4.250E-02	9.953E-02	6.150E-04	3.083E-01	7.197E+00	1.357E-13	2.053E-12	3.335E-03		9.294E-02	3.714E-02	5.064E-05	1.342E-03	2.785E-03	1.238E-01	8.753E+00	4.495E-14	5.661E-13	8.358E-03
FBgn0003391	RpL36	protein_coding	X:522370-523516	1.861E-02	1.483E-01	3.206E-01	3.701E-01	1.397E-04	3.182E-02	7.765E+00	7.060E-02	7.850E-02	6.510E-03		1.180E-02	3.236E-02	1.173E-01	1.607E-01	4.058E-04	2.109E-02	5.190E+00	7.254E-02	7.761E-02	6.227E-03
FBgn0003392	RpS5a	protein_coding	X:17037620-17042297	4.170E-02	3.730E-02	4.506E-03	3.365E-02	1.244E-03	2.221E-15	8.045E+00	5.487E-01	5.566E-01	2.090E+11		1.433E-02	3.221E-02	7.686E-02	1.163E-01	4.953E-04	1.710E-02	8.218E+00	1.142E-01	1.199E-01	9.333E-03
FBgn0003396	E(spl)m2-BFM	protein_coding	3R:21842235-21843192	1.479E-03	1.733E-02	3.891E-01	4.318E-01	9.500E-05	3.911E-02	8.697E+00	3.200E-02	3.724E-02	4.210E-04		3.540E-03	1.648E-02	2.044E-01	2.503E-01	2.391E-04	1.272E-01	8.446E+00	2.347E-03	3.034E-03	3.097E-04
FBgn0003401	RpLP1	protein_coding	2L:419951-420864	8.220E-03	1.137E-02	1.891E-02	6.760E-02	8.049E-04	1.572E-01	8.437E+00	9.279E-15	1.972E-13	5.821E-04		Not expressed in males	-	-	-	-	-	-	-	-	-
FBgn0003415	RpL19	protein_coding	2R:20855399-20857070	3.880E-03	1.525E-02	1.779E-01	2.384E-01	2.832E-04	3.229E-02	7.828E+00	6.653E-04	9.952E-04	1.337E-03		1.240E-02	7.471E-02	2.396E-01	2.840E-01	1.847E-04	7.949E-03	5.078E+00	2.934E-01	2.984E-01	1.736E-02
FBgn0003416	E(spl)m3-HLH	protein_coding	3R:21847544-21848849	3.889E-03	5.097E-03	1.914E-02	6.770E-02	8.494E-04	4.171E-02	8.383E+00	1.696E-04	2.814E-04	1.038E-03		1.654E-02	1.573E-02	5.951E-03	1.942E-02	1.170E-03	3.217E-02	5.894E+00	6.310E-03	7.676E-03	5.723E-03
FBgn0003429	RpS3	protein_coding	3R:19184533-19185929	4.319E-02	6.680E-02	3.110E-02	8.514E-02	7.196E-04	1.755E-01	5.287E+00	1.085E-12	1.294E-11	2.740E-03		3.570E-03	1.269E-02	1.579E-01	2.030E-01	3.132E-04	1.183E-01	6.328E+00	2.058E-07	5.199E-07	3.360E-04
FBgn0003435	RpL32	protein_coding	3R:25870950-25871883	1.413E-01	3.900E-01	1.013E-01	1.633E-01	4.033E-04	0.000E+00	6.623E+00	8.453E-01	8.475E-01	Inf		7.613E-03	3.367E-02	2.172E-01	2.628E-01	2.517E-04	3.305E-02	1.134E+01	5.149E-03	6.334E-03	2.564E-03
FBgn0003444	E(spl)m4-BFM	protein_coding	3R:21849542-21850301	1.312E-02	6.461E-03	1.994E-04	6.131E-03	2.261E-03	4.375E-02	8.969E+00	2.452E-06	5.820E-06	3.339E-03		3.443E-02	1.176E-02	1.604E-05	7.588E-04	3.259E-03	5.304E-02	6.027E+00	2.193E-04	3.317E-04	7.226E-03
FBgn0003447	E(spl)m5-HLH	protein_coding	3R:21854575-21855457	1.292E-02	1.547E-02	1.389E-02	5.795E-02	9.297E-04	9.631E-02	9.486E+00	2.359E-06	5.621E-06	1.493E-03		3.052E-03	5.433E-03	4.805E-02	8.227E-02	6.252E-04	1.734E-01	8.056E+00	1.094E-08	3.584E-08	1.959E-04
FBgn0003449	E(spl)m6-BFM	protein_coding	3R:21858632-21859769	1.707E-03	6.113E-03	1.695E-01	2.304E-01	3.108E-04	4.043E-04	9.598E+00	4.725E-01	4.818E-01	4.700E-02		1.391E-02	2.336E-02	3.632E-02	6.711E-02	6.629E-04	9.520E-03	8.382E+00	4.370E-02	4.778E-02	1.627E-02
FBgn0003450	E(spl)m7-HLH	protein_coding	3R:21862759-21863741	7.169E-03	4.183E-02	2.728E-01	3.263E-01	1.908E-04	2.810E-02	3.610E+00	5.031E-05	9.190E-05	2.840E-03		Not expressed in males	-	-	-	-	-	-	-	-	-
FBgn0003459	Rcc1	protein_coding	3L:5923361-5925873	4.405E-02	6.870E-02	3.268E-02	8.750E-02	7.138E-04	1.872E-01	4.741E+00	8.738E-05	1.526E-04	2.619E-03		Not expressed in males	-	-	-	-	-	-	-	-	-
FBgn0003462	mal	protein_coding	X:20300701-20304237	2.763E-04	2.297E-03	3.379E-01	3.860E-01	1.339E-04	3.526E-03	1.309E+01	2.792E-04	4.443E-04	8.720E-04		1.414E-03	2.374E-03	3.892E-02	7.051E-02	6.627E-04	4.429E-03	1.323E+01	9.484E-05	1.519E-04	3.552E-03
FBgn0003463	mam	protein_coding	2R:9878707-9947861	1.637E-02	5.711E-02	1.666E-01	2.282E-01	3.191E-04	3.605E-02	4.370E+00	1.871E-01	1.976E-01	5.055E-03		2.340E-02	2.436E-02	8.432E-03	2.442E-02	1.069E-03	1.870E-01	5.437E+00	8.431E-02	8.959E-02	1.393E-03
FBgn0003464	Map205	protein_coding	3R:27881000-27894163	4.186E-03	5.035E-03	1.423E-02	5.862E-02	9.255E-04	1.722E-03	9.538E+00	3.819E-01	3.921E-01	2.706E-02		1.019E-02	6.977E-03	1.264E-03	7.248E-03	1.625E-03	4.039E-02	8.337E+00	2.073E-03	2.697E-03	2.808E-03
FBgn0003479	twe	protein_coding	2L:16259413-16261877	1.317E-02	3.278E-02	7.322E-02	1.343E-01	4.473E-04	1.879E-01	5.543E+00	1.159E-08	4.510E-08	7.802E-04		Not expressed in males	-	-	-	-	-	-	-	-	-
FBgn0003480	mei-9	protein_coding	X:4208262-4212834	2.366E-02	9.242E-02	1.668E-01	2.283E-01	2.849E-04	1.580E-01	3.946E+00	1.316E-06	3.285E-06	1.666E-03		Not expressed in males	-	-	-	-	-	-	-	-	-
FBgn0003482	mei-218	protein_coding	X:17030017-17037029	2.480E-02	7.170E-02	1.166E-01	1.787E-01	3.851E-04	2.157E-01	4.390E+00	7.244E-08	2.385E-07	1.280E-03		Not expressed in males	-	-	-	-	-	-	-	-	-
FBgn0003483	mei-S332	protein_coding	2R:18009605-18012071	1.419E-02	4.158E-02	1.143E-01	1.766E-01	3.799E-04	8.538E-02	9.315E+00	1.550E-05	3.113E-05	1.850E-03		Not expressed in males	-	-	-	-	-	-	-	-	-
FBgn0003486	mei-W68	protein_coding	2R:15343674-15347028	4.534E-02	9.856E-02	7.099E-02	1.318E-01	5.120E-04	7.036E-02	3.640E+00	2.006E-05	3.957E-05	7.172E-03		Not expressed in males	-	-	-	-	-	-	-	-	-
FBgn0003495	Men	protein_coding	3R:8538824-8548164	1.115E-02	2.508E-02	7.694E-02	1.381E-01	4.951E-04	4.731E-02	8.569E+00	1.290E-03	1.847E-03	2.624E-03		0.000E+00	1.674E-02	5.336E-01	5.604E-01	0.000E+00	1.537E-01	7.315E+00	2.250E-07	5.614E-07	0.000E+00
FBgn0003507	Met	protein_coding	X:11510156-11515313	1.345E-02	5.765E-02	1.726E-01	2.332E-01	2.596E-04	1.064E-01	9.015E+00	2.085E-05	4.098E-05	1.407E-03		1.162E-02	2.469E-02	7.163E-02	1.104E-01	5.237E-04	2.550E-02	8.338E+00	3.100E-02	3.438E-02	5.070E-03
FBgn0003511	E(spl)malpha-BFM	protein_coding	3R:21836614-21837290	3.964E-02	5.039E-02	1.462E-02	5.944E-02	8.757E-04	9.685E-02	7.015E+00	9.236E-06	1.943E-05	4.556E-03		1.615E-02	3.151E-02	5.536E-02	9.107E-02	5.706E-04	0.000E+00	5.126E+00	7.535E-01	7.545E-01	Inf
FBgn0003512	E(spl)mbeta-HLH	protein_coding	3R:21830767-21831745	8.619E-03	1.934E-02	8.120E-02	1.426E-01	4.961E-04	5.021E-02	7.995E+00	2.757E-03	3.747E-03	1.911E-03		2.159E-23	3.509E-02	4.860E-01	5.160E-01	6.850E-25	2.222E-02	5.798E+00	4.534E-02	4.949E-02	1.082E-23
FBgn0003514	E(spl)mdelta-HLH	protein_coding	3R:21823342-21824355	3.091E-03	1.947E-03	8.073E-04	1.363E-02	1.767E-03	3.461E-03	1.063E+01	1.154E-01	1.251E-01	9.940E-03		1.757E-03	2.753E-03	3.020E-02	5.877E-02	7.106E-04	9.461E-03	1.032E+01	4.693E-03	5.806E-03	2.068E-03
FBgn0003515	E(spl)mgamma-HLH	protein_coding	3R:21825572-21826483	3.180E-02	5.006E-02	3.268E-02	8.750E-02	7.070E-04	2.059E-01	6.802E+00	9.231E-12	8.122E-11	1.719E-03		1.168E-02	1.054E-02	4.745E-03	1.671E-02	1.233E-03	2.273E-01	7.592E+00	3.164E-10	1.491E-09	5.722E-04
FBgn0003517	mago	protein_coding	2R:17016081-17017242	9.674E-04	7.707E-04	2.675E-03	2.564E-02	1.397E-03	1.004E-03	1.384E+01	9.282E-03	1.163E-02	1.073E-02		3.185E-03	2.036E-03	8.747E-04	5.848E-03	1.741E-03	5.942E-03	1.319E+01	1.299E-08	4.202E-08	5.966E-03
FBgn0003525	Mlc1	protein_coding	3R:23482799-23485899	7.370E-03	2.319E-02	1.432E-01	2.056E-01	3.538E-04	5.394E-02	9.388E+00	7.247E-03	9.251E-03	1.521E-03		Not expressed in males	-	-	-	-	-	-	-	-	-
FBgn0003527	Mlc2	protein_coding	3R:25997159-26000273	9.941E-03	5.004E-02	2.427E-01	2.987E-01	2.211E-04	8.374E-02	5.748E+00	3.591E-05	6.737E-05	1.321E-03		7.390E-03	1.512E-02	6.684E-02	1.044E-01	5.440E-04	7.751E-02	4.554E+00	2.843E-07	6.976E-07	1.061E-03
FBgn0003545	mle	protein_coding	2R:1862361-1868283	1.800E-02	3.840E-02	6.323E-02	1.233E-01	5.218E-04	1.875E-01	9.428E+00	8.702E-10	4.446E-09	1.069E-03		1.220E-02	1.251E-02	7.987E-03	2.356E-02	1.085E-03	1.484E-01	8.005E+00	1.786E-06	3.788E-06	9.149E-04
FBgn0003567	msl-3	protein_coding	3L:7116312-7118633	1.446E-02	2.669E-02	4.272E-02	9.977E-02	6.031E-04	1.069E-01	7.891E+00	6.395E-07	1.694E-06	1.507E-03		4.907E-03	2.490E-02	2.404E-01	2.847E-01	2.194E-04	9.813E-02	4.944E+00	7.186E-03	8.666E-03	5.566E-04
FBgn0003575	mnd	protein_coding	3L:14978199-14984767	5.741E-03	6.426E-03	1.138E-02	5.300E-02	9.944E-04	1.038E-02	8.357E+00	1.954E-01	2.059E-01	6.155E-03		1.899E-02	1.441E-02	2.114E-03	9.856E-03	1.467E-03	2.226E-02	6.994E+00	2.268E-02	2.561E-02	9.497E-03
FBgn0003607	mod	protein_coding	3R:27877781-27880696	3.617E-03	7.136E-03	5.760E-02	1.169E-01	5.642E-04	1.653E-02	1.035E+01	5.143E-06	1.140E-05	2.435E-03		1.703E-03	3.493E-03	5.969E-02	9.611E-02	5.426E-04	1.514E-02	9.422E+00	2.012E-04	3.060E-04	1.252E-03
FBgn0003612	mod(mdg4)	protein_coding	3R:17176567-17203123	2.202E-02	5.797E-02	1.001E-01	1.622E-01	4.229E-04	1.517E-01	9.216E+00	8.342E-06	1.772E-05	1.616E-03		2.038E-02	1.941E-02	5.987E-03	1.946E-02	1.169E-03	4.097E-02	5.937E+00	1.199E-02	1.401E-02	5.536E-03
FBgn0003654	mor	protein_coding	3R:11793855-11798635	2.153E-03	2.908E-03	1.959E-02	6.840E-02	8.240E-04	1.664E-02	9.867E+00	5.030E-08	1.718E-07	1.440E-03		1.674E-03	1.404E-03	3.419E-03	1.332E-02	1.327E-03	3.285E-02	1.049E+01	3.341E-11	1.980E-10	5.672E-04
FBgn0003655	Rpn8	protein_coding	2R:20287550-20292050	7.940E-03	1.544E-02	5.175E-02	1.107E-01	5.725E-04	6.642E-02	1.002E+01	2.010E-06	4.863E-06	1.331E-03		Not expressed in males	-	-	-	-	-	-	-	-	-
FBgn0003656	Mp20	protein_coding	2R:9134174-9136385	4.744E-03	3.929E-03	3.187E-03	2.824E-02	1.344E-03	1.038E-02	1.026E+01	1.803E-01	1.909E-01	5.088E-03		1.885E-03	1.013E-03	3.315E-04	3.453E-03	2.072E-03	1.906E-02	1.028E+01	2.089E-03	2.717E-03	1.101E-03
FBgn0003660	mr	protein_coding	2R:19859953-19862931	2.249E-04	1.697E-03	3.050E-01	3.563E-01	1.475E-04	3.949E-03	1.023E+01	9.015E-03	1.132E-02	6.339E-04		2.271E-03	3.450E-03	3.083E-02	5.972E-02	7.328E-04	4.283E-03	1.017E+01	7.262E-03	8.739E-03	5.903E-03
FBgn0003676	ms(3)K81	protein_coding	3R:22701573-22702284	3.020E-03	4.915E-03	3.580E-02	9.089E-02	6.839E-04	1.789E-02	1.145E+01	2.262E-07	6.661E-07	1.879E-03		4.975E-03	4.349E-03	3.951E-03	1.466E-02	1.273E-03	2.283E-02	8.749E+00	6.788E-05	1.108E-04	2.425E-03
FBgn0003687	sa	protein_coding	3L:21398524-21399838	2.093E-02	5.170E-02	9.394E-02	1.556E-01	4.505E-04	1.506E-01	7.729E+00	1.240E-07	3.874E-07	1.546E-03		Not expressed in males	-	-	-	-	-	-	-	-	-
FBgn0003701	Acp26Aa	protein_coding	2L:5892882-5893896	6.845E-02	1.320E-01	5.308E-02	1.120E-01	5.771E-04	3.781E-01	8.030E+00	5.245E-10	2.808E-09	2.015E-03		1.273E-02	2.547E-02	6.296E-02	1.001E-01	5.565E-04	5.141E-02	3.823E+00	1.612E-04	2.492E-04	2.757E-03
FBgn0003714	Acp26Ab	protein_coding	2L:5892297-5892862	4.214E-04	3.651E-03	3.180E-01	3.677E-01	1.285E-04	1.008E-02	1.030E+01	4.687E-05	8.634E-05	4.654E-04		8.712E-03	6.509E-03	1.968E-03	9.395E-03	1.490E-03	2.231E-02	9.128E+00	1.207E-03	1.621E-03	4.346E-03
FBgn0003716	Mst87F	protein_coding	3R:9652872-9653730	2.617E-03	4.361E-03	3.562E-02	9.062E-02	6.679E-04	7.795E-03	1.044E+01	2.963E-03	4.008E-03	3.737E-03		1.251E-02	9.952E-03	2.642E-03	1.136E-02	1.399E-03	6.731E-02	9.565E+00	4.064E-09	1.452E-08	2.068E-03
FBgn0003731	Acp95EF	protein_coding	3R:20054696-20055001	1.782E-02	2.102E-02	1.338E-02	5.708E-02	9.437E-04	1.921E-01	7.714E+00	2.781E-08	9.967E-08	1.033E-03		2.283E-02	6.176E-02	1.090E-01	1.517E-01	4.115E-04	1.326E-01	7.397E+00	4.472E-06	8.876E-06	1.917E-03
FBgn0003732	Mst98Ca	protein_coding	3R:24117059-24118378	4.728E-03	7.149E-03	2.437E-02	7.555E-02	7.362E-04	4.708E-02	1.046E+01	2.727E-06	6.409E-06	1.118E-03		3.656E-03	7.058E-03	5.320E-02	8.831E-02	5.766E-04	4.169E-02	6.363E+00	8.995E-05	1.444E-04	9.763E-04
FBgn0003733	MtnA	protein_coding	3R:5609128-5610092	4.552E-02	8.651E-02	5.283E-02	1.118E-01	5.858E-04	2.954E-01	7.722E+00	1.141E-11	9.718E-11	1.715E-03		Not expressed in males	-	-	-	-	-	-	-	-	-
FBgn0003741	MtnB	protein_coding	3R:16328823-16329468	1.052E-02	2.132E-02	5.259E-02	1.116E-01	5.495E-04	3.253E-02	7.981E+00	1.992E-04	3.250E-04	3.601E-03		1.119E-02	2.992E-02	1.115E-01	1.545E-01	4.165E-04	4.991E-02	6.013E+00	2.408E-04	3.613E-04	2.497E-03
FBgn0003742	mu2	protein_coding	3L:1942733-1947475	2.757E-03	1.021E-02	1.702E-01	2.308E-01	3.006E-04	2.754E-02	9.799E+00	2.102E-03	2.903E-03	1.114E-03		2.257E-03	6.388E-03	1.234E-01	1.675E-01	3.932E-04	4.682E-02	8.987E+00	1.815E-06	3.846E-06	5.365E-04
FBgn0003744	mud	protein_coding	X:14141764-14152628	3.707E-03	1.063E-02	1.076E-01	1.697E-01	3.882E-04	6.965E-03	9.923E+00	3.854E-02	4.442E-02	5.924E-03		1.087E-02	1.151E-02	8.975E-03	2.539E-02	1.051E-03	1.864E-02	9.028E+00	2.983E-04	4.414E-04	6.488E-03
FBgn0003748	mus101	protein_coding	X:13616278-13621146	8.426E-03	5.756E-03	1.241E-03	1.799E-02	1.630E-03	4.010E-02	1.062E+01	1.581E-08	5.955E-08	2.339E-03		1.496E-03	3.594E-03	8.918E-02	1.300E-01	4.634E-04	2.652E-02	1.084E+01	5.245E-07	1.229E-06	6.281E-04
FBgn0003751	mus201	protein_coding	2L:8438168-8442342	4.494E-02	4.907E-02	1.031E-02	5.050E-02	1.019E-03	5.007E-02	5.689E+00	1.081E-02	1.341E-02	9.991E-03		Not expressed in males	-	-	-	-	-	-	-	-	-
FBgn0003861	mus205	protein_coding	2R:3681129-3688549	7.192E-02	6.356E-02	4.140E-03	3.242E-02	1.260E-03	7.988E-02	9.682E+00	2.230E-11	1.741E-10	1.002E-02		1.939E-02	1.136E-02	5.440E-04	4.605E-03	1.900E-03	9.997E-02	1.077E+01	1.723E-10	8.669E-10	2.159E-03
FBgn0003863	mus301	protein_coding	3L:8130907-8135114	2.193E-02	8.842E-03	5.616E-05	3.014E-03	2.761E-03	4.057E-03	1.375E+01	4.503E-05	8.321E-05	6.016E-02		5.177E-03	5.186E-03	7.306E-03	2.217E-02	1.111E-03	9.666E-03	1.377E+01	2.643E-09	9.833E-09	5.961E-03
FBgn0003866	mus304	protein_coding	3L:18102913-18105947	3.155E-02	2.095E-02	1.066E-03	1.652E-02	1.677E-03	5.952E-02	4.681E+00	4.435E-05	8.222E-05	5.901E-03		4.503E-03	9.504E-03	6.473E-02	1.020E-01	5.273E-04	1.285E-02	4.798E+00	1.284E-01	1.342E-01	3.901E-03
FBgn0003867	mus308	protein_coding	3R:8531244-8538021	9.272E-02	8.493E-02	5.022E-03	3.548E-02	1.215E-03	1.479E-01	7.864E+00	1.758E-08	6.566E-08	6.979E-03		2.735E-02	1.256E-02	1.336E-04	2.144E-03	2.425E-03	9.858E-02	8.822E+00	3.778E-11	2.194E-10	3.088E-03
FBgn0003882	Blm	protein_coding	3R:7562531-7567505	4.722E-03	7.142E-03	2.796E-02	8.043E-02	7.360E-04	2.947E-02	9.076E+00	1.303E-04	2.208E-04	1.784E-03		1.556E-02	2.988E-02	4.678E-02	8.069E-02	5.796E-04	1.130E-02	7.666E+00	2.536E-04	3.794E-04	1.532E-02
FBgn0003884	mus312	protein_coding	3L:7322231-7326571	5.199E-04	4.653E-03	3.499E-01	3.962E-01	1.244E-04	1.208E-02	1.245E+01	9.237E-04	1.352E-03	4.790E-04		1.389E-03	9.858E-03	2.978E-01	3.402E-01	1.568E-04	2.220E-03	1.249E+01	1.956E-01	2.012E-01	6.963E-03
FBgn0003887	Myb	protein_coding	X:15748864-15751856	2.178E-03	6.816E-03	1.436E-01	2.060E-01	3.556E-04	1.631E-02	1.213E+01	9.238E-04	1.352E-03	1.486E-03		3.153E-03	4.790E-03	3.132E-02	6.037E-02	7.328E-04	1.646E-02	1.110E+01	5.698E-06	1.106E-05	2.133E-03
FBgn0003888	na	protein_coding	X:14160399-14171449	4.414E-02	1.122E-01	9.058E-02	1.522E-01	4.380E-04	5.939E-02	1.034E+01	7.605E-04	1.126E-03	8.273E-03		1.177E-02	2.436E-02	6.650E-02	1.041E-01	5.379E-04	8.394E-02	1.043E+01	2.584E-07	6.382E-07	1.561E-03
FBgn0003890	Atpalpha	protein_coding	3R:16774435-16801961	2.704E-02	4.909E-02	4.602E-02	1.039E-01	6.132E-04	1.175E-01	9.825E+00	1.766E-14	3.498E-13	2.562E-03		5.443E-03	1.252E-02	7.346E-02	1.123E-01	4.840E-04	3.052E-02	9.951E+00	8.452E-07	1.902E-06	1.985E-03
FBgn0003891	nau	protein_coding	3R:19538535-19544079	3.968E-03	8.287E-03	6.978E-02	1.306E-01	5.330E-04	9.908E-03	9.456E+00	1.980E-01	2.084E-01	4.458E-03		4.833E-03	6.647E-03	2.248E-02	4.815E-02	8.094E-04	6.248E-02	9.166E+00	9.135E-04	1.251E-03	8.611E-04
FBgn0003941	ncd	protein_coding	3R:25630011-25632849	5.677E-04	6.725E-04	1.294E-02	5.618E-02	9.397E-04	5.605E-04	1.361E+01	8.186E-02	9.039E-02	1.127E-02		5.990E-04	1.229E-03	6.687E-02	1.044E-01	5.424E-04	2.946E-03	1.310E+01	8.495E-03	1.013E-02	2.263E-03
FBgn0003942	ndl	protein_coding	3L:6587037-6596466	3.661E-16	7.336E-04	5.494E-01	5.779E-01	5.555E-16	1.638E-04	1.389E+01	2.737E-01	2.843E-01	2.487E-14		5.561E-04	6.369E-04	1.225E-02	3.096E-02	9.719E-04	1.571E-03	1.352E+01	2.316E-02	2.611E-02	3.941E-03
FBgn0003943	nec	protein_coding	2R:3043981-3045746	9.322E-04	2.876E-03	1.401E-01	2.026E-01	3.608E-04	1.306E-02	1.272E+01	6.532E-03	8.392E-03	7.945E-04		2.292E-03	1.417E-03	7.276E-04	5.326E-03	1.801E-03	1.147E-02	1.311E+01	2.957E-03	3.772E-03	2.224E-03
FBgn0003961	net	protein_coding	2L:82420-87387	5.786E-02	6.408E-01	3.460E-01	3.931E-01	1.005E-04	3.403E-01	9.297E+00	1.347E-13	2.043E-12	1.892E-03		1.630E-01	2.620E-01	2.594E-02	5.286E-02	6.923E-04	1.078E+00	8.632E+00	2.915E-12	2.285E-11	1.683E-03
FBgn0003963	neur	protein_coding	3R:4846069-4865193	5.587E-19	3.290E-02	6.406E-01	6.617E-01	1.890E-20	6.198E-02	6.871E+00	1.842E-03	2.569E-03	1.003E-19		2.586E-02	3.215E-02	1.659E-02	3.842E-02	8.952E-04	2.381E-02	4.433E+00	1.261E-01	1.320E-01	1.209E-02
FBgn0003964	ng1	protein_coding	X:3136444-3136967	6.584E-03	1.093E-02	3.114E-02	8.520E-02	6.707E-04	5.095E-02	8.495E+00	3.304E-06	7.647E-06	1.438E-03		8.176E-03	1.596E-02	5.869E-02	9.510E-02	5.704E-04	1.254E-02	6.113E+00	8.910E-02	9.449E-02	7.260E-03
FBgn0003965	ninaA	protein_coding	2L:877301-878270	6.519E-20	8.038E-02	5.566E-01	5.846E-01	9.028E-22	1.776E-01	8.174E+00	1.270E-12	1.483E-11	4.087E-21		1.161E-01	1.819E-01	3.020E-02	5.877E-02	7.106E-04	1.074E-01	8.742E+00	2.134E-15	3.791E-14	1.203E-02
FBgn0003969	ninaB	protein_coding	3R:9526286-9528886	6.628E-03	1.146E-02	4.236E-02	9.933E-02	6.440E-04	4.469E-02	9.262E+00	8.312E-09	3.360E-08	1.651E-03		2.130E-02	9.543E-03	1.060E-04	1.913E-03	2.485E-03	4.529E-02	6.591E+00	8.470E-05	1.364E-04	5.237E-03
FBgn0003977	ninaC	protein_coding	2L:7377701-7384344	0.000E+00	1.234E-02	7.121E-01	7.269E-01	0.000E+00	8.220E-04	6.788E+00	4.670E-01	4.763E-01	0.000E+00		1.273E-02	1.739E-02	1.827E-02	4.122E-02	8.144E-04	1.488E-02	4.913E+00	1.100E-02	1.293E-02	9.522E-03
FBgn0003978	ninaD	protein_coding	2L:18081627-18083608	7.938E-02	1.765E-02	5.765E-07	1.896E-04	5.005E-03	1.070E-01	8.338E+00	9.327E-10	4.731E-09	8.258E-03		Not expressed in males	-	-	-	-	-	-	-	-	-
FBgn0003979	ninaE	protein_coding	3R:15711976-15713928	2.982E-03	2.069E-02	3.088E-01	3.592E-01	1.604E-04	1.196E-01	1.287E+01	2.400E-04	3.859E-04	2.775E-04		Not expressed in males	-	-	-	-	-	-	-	-	-
FBgn0003980	slou	protein_coding	3R:17374382-17382904	2.030E-02	3.341E-02	3.923E-02	9.505E-02	6.763E-04	7.918E-02	1.256E+01	3.882E-04	6.042E-04	2.854E-03		Not expressed in males	-	-	-	-	-	-	-	-	-
FBgn0003996	nkd	protein_coding	3L:18996840-19038549	5.204E-02	2.922E-02	4.323E-04	9.323E-03	1.982E-03	1.242E-01	5.634E+00	8.128E-07	2.104E-06	4.666E-03		7.336E-03	1.168E-02	3.521E-02	6.556E-02	6.992E-04	1.670E-01	6.529E+00	2.509E-06	5.201E-06	4.888E-04
FBgn0004003	nod	protein_coding	X:11474804-11479783	5.546E-02	6.811E-02	1.575E-02	6.179E-02	9.064E-04	8.666E-01	5.809E+00	4.299E-11	3.174E-10	7.123E-04		7.232E-02	3.837E-02	3.048E-04	3.293E-03	2.098E-03	1.798E-01	9.040E+00	2.718E-10	1.300E-09	4.476E-03
FBgn0004028	nos	protein_coding	3R:14982959-14985924	2.226E-02	2.119E-02	5.653E-03	3.813E-02	1.170E-03	3.444E-02	1.322E+01	3.889E-10	2.167E-09	7.194E-03		5.509E-03	3.678E-03	1.093E-03	6.634E-03	1.667E-03	1.768E-02	1.363E+01	1.553E-11	9.933E-11	3.468E-03
FBgn0004045	numb	protein_coding	2L:9437468-9464184	6.157E-04	1.301E-03	6.202E-02	1.220E-01	5.267E-04	4.493E-03	1.438E+01	5.380E-05	9.774E-05	1.525E-03		Not expressed in males	-	-	-	-	-	-	-	-	-
FBgn0004047	odd	protein_coding	2L:3604223-3606756	5.037E-03	1.395E-02	1.127E-01	1.748E-01	4.019E-04	2.327E-02	1.385E+01	2.826E-06	6.629E-06	2.410E-03		Not expressed in males	-	-	-	-	-	-	-	-	-
FBgn0004049	okr	protein_coding	2L:2989593-2992759	6.081E-03	6.702E-03	9.426E-03	4.832E-02	1.010E-03	6.621E-03	8.845E+00	1.086E-01	1.182E-01	1.022E-02		2.777E-03	1.036E-02	1.581E-01	2.032E-01	2.984E-04	1.149E-02	7.206E+00	4.326E-03	5.387E-03	2.691E-03
FBgn0004050	opa	protein_coding	3R:678534-695701	1.031E-02	3.697E-02	1.466E-01	2.086E-01	3.103E-04	3.165E-02	7.648E+00	1.056E-02	1.312E-02	3.625E-03		2.724E-03	1.356E-02	2.419E-01	2.859E-01	2.236E-04	8.588E-03	5.365E+00	6.472E-02	6.958E-02	3.530E-03
FBgn0004055	or	protein_coding	2R:19855461-19856466	0.000E+00	5.635E-02	5.740E-01	5.995E-01	0.000E+00	7.319E-02	7.565E+00	1.227E-03	1.763E-03	0.000E+00		9.678E-03	1.962E-02	6.251E-02	9.953E-02	5.492E-04	9.683E-03	8.243E+00	2.173E-01	2.227E-01	1.113E-02
FBgn0004057	ord	protein_coding	2R:19158779-19163059	1.378E-02	2.055E-02	2.562E-02	7.701E-02	7.465E-04	9.513E-02	9.448E+00	1.683E-09	8.058E-09	1.612E-03		9.393E-03	5.292E-03	4.368E-04	4.041E-03	1.976E-03	3.861E-02	1.033E+01	1.496E-06	3.204E-06	2.708E-03
FBgn0004066	ort	protein_coding	3R:15485469-15489394	1.878E-03	7.533E-03	1.669E-01	2.284E-01	2.775E-04	1.503E-02	1.075E+01	5.835E-04	8.823E-04	1.391E-03		4.492E-03	1.276E-02	1.241E-01	1.682E-01	3.917E-04	2.352E-02	1.007E+01	2.703E-03	3.463E-03	2.125E-03
FBgn0004087	osk	protein_coding	3R:4760847-4764117	1.080E-03	3.113E-03	1.269E-01	1.890E-01	3.863E-04	2.895E-02	8.774E+00	3.613E-04	5.644E-04	4.154E-04		2.306E-02	1.448E-02	7.946E-04	5.583E-03	1.773E-03	9.693E-02	6.711E+00	3.814E-11	2.212E-10	2.648E-03
FBgn0004103	osp	protein_coding	2L:14599195-14689340	1.759E-03	2.483E-03	2.402E-02	7.503E-02	7.885E-04	5.642E-03	1.108E+01	3.522E-03	4.716E-03	3.470E-03		1.912E-03	1.441E-03	2.049E-03	9.666E-03	1.478E-03	2.441E-03	1.081E+01	7.300E-02	7.804E-02	8.722E-03
FBgn0004106	otu	protein_coding	X:8379040-8383568	1.073E-02	1.923E-02	4.869E-02	1.072E-01	6.209E-04	8.787E-02	1.056E+01	2.459E-08	8.934E-08	1.359E-03		1.860E-02	1.109E-02	5.995E-04	4.808E-03	1.867E-03	1.004E-01	6.731E+00	1.456E-06	3.128E-06	2.063E-03
FBgn0004107	ovo	protein_coding	X:4942305-4964962	8.002E-03	2.829E-02	1.637E-01	2.253E-01	3.149E-04	1.656E-01	9.513E+00	1.204E-10	7.805E-10	5.379E-04		Not expressed in males	-	-	-	-	-	-	-	-	-
FBgn0004117	SP	protein_coding	3L:13294734-13295022	3.129E-02	5.495E-02	4.161E-02	9.833E-02	6.339E-04	5.765E-02	1.157E+01	2.205E-11	1.726E-10	6.042E-03		4.535E-03	6.830E-03	3.029E-02	5.888E-02	7.391E-04	3.506E-02	1.209E+01	2.345E-08	7.184E-08	1.440E-03
FBgn0004132	pbl	protein_coding	3L:7889208-7905054	6.128E-04	1.059E-02	4.358E-01	4.736E-01	6.440E-05	6.702E-03	8.833E+00	7.089E-02	7.879E-02	1.018E-03		1.102E-02	1.660E-02	2.763E-02	5.527E-02	7.391E-04	4.196E-02	7.248E+00	9.531E-04	1.301E-03	2.923E-03
FBgn0004133	Pc	protein_coding	3L:21299237-21311120	5.238E-03	2.541E-02	1.941E-01	2.538E-01	2.295E-04	7.662E-02	4.896E+00	4.156E-07	1.156E-06	7.610E-04		7.016E-03	1.582E-02	8.004E-02	1.199E-01	4.937E-04	1.478E-01	6.953E+00	3.335E-10	1.560E-09	5.284E-04
FBgn0004167	Pcl	protein_coding	2R:14022930-14027495	9.705E-03	6.724E-03	1.329E-03	1.856E-02	1.606E-03	5.403E-02	7.969E+00	4.499E-03	5.917E-03	1.999E-03		3.616E-03	1.386E-02	1.847E-01	2.304E-01	2.903E-04	6.920E-02	7.821E+00	3.796E-04	5.529E-04	5.816E-04
FBgn0004169	Pcp	protein_coding	2L:7021681-7022470	7.940E-02	9.491E-02	1.336E-02	5.704E-02	9.312E-04	9.524E-02	9.844E+00	4.328E-05	8.032E-05	9.280E-03		9.183E-03	1.810E-02	5.872E-02	9.513E-02	5.647E-04	1.309E-01	1.072E+01	9.956E-06	1.861E-05	7.808E-04
FBgn0004198	pcx	protein_coding	X:2119328-2132078	1.279E-02	5.691E-02	2.170E-01	2.753E-01	2.502E-04	6.317E-03	3.102E+00	7.718E-02	8.545E-02	2.254E-02		3.609E-02	6.607E-02	4.935E-02	8.400E-02	6.081E-04	9.638E-03	3.803E+00	7.751E-02	8.267E-02	4.169E-02
FBgn0004242	peb	protein_coding	X:4511596-4521239	1.162E-02	4.063E-02	1.645E-01	2.260E-01	3.184E-04	1.539E-01	8.013E+00	9.301E-06	1.955E-05	8.403E-04		1.093E-02	3.118E-02	8.019E-02	1.201E-01	3.901E-04	2.194E-02	8.748E+00	5.903E-03	7.207E-03	5.543E-03
FBgn0004244	CG10598	protein_coding	X:17119189-17120900	7.573E-02	1.244E-01	3.904E-02	9.491E-02	6.773E-04	1.919E-01	4.056E+00	4.315E-07	1.194E-06	4.393E-03		4.430E-02	2.438E-02	3.801E-04	3.761E-03	2.022E-03	4.575E-01	5.046E+00	1.536E-07	3.996E-07	1.078E-03
FBgn0004359	CG9757	protein_coding	3R:9437304-9438155	8.298E-03	1.965E-02	7.173E-02	1.327E-01	4.701E-04	3.707E-02	5.875E+00	8.267E-04	1.219E-03	2.492E-03		7.407E-03	1.370E-02	5.273E-02	8.778E-02	6.017E-04	5.944E-02	5.256E+00	5.826E-09	2.019E-08	1.387E-03
FBgn0004362	Fib	protein_coding	2R:18960431-18962248	1.685E-02	2.546E-02	2.939E-02	8.211E-02	7.367E-04	2.968E-02	1.077E+01	1.895E-04	3.106E-04	6.318E-03		4.716E-02	4.387E-02	5.415E-03	1.823E-02	1.197E-03	8.744E-02	4.608E+00	3.047E-02	3.383E-02	6.004E-03
FBgn0004363	CG2150	protein_coding	3R:27589025-27590494	3.340E-03	5.459E-03	3.168E-02	8.621E-02	6.811E-04	7.625E-03	1.310E+01	1.030E-01	1.125E-01	4.876E-03		1.135E-03	6.355E-03	2.673E-01	3.106E-01	1.988E-04	1.500E-02	1.300E+01	9.344E-04	1.278E-03	8.421E-04
FBgn0004364	Pepck	protein_coding	2R:14424271-14426921	1.374E-02	1.897E-02	2.169E-02	7.171E-02	8.062E-04	4.415E-02	9.325E+00	2.210E-05	4.331E-05	3.464E-03		1.112E-02	5.443E-03	1.840E-04	2.503E-03	2.273E-03	5.988E-02	9.452E+00	1.120E-06	2.457E-06	2.066E-03
FBgn0004367	per	protein_coding	X:2579612-2586813	3.084E-03	2.920E-02	3.610E-01	4.066E-01	1.176E-04	1.199E-01	4.578E+00	8.918E-03	1.121E-02	2.863E-04		Not expressed in males	-	-	-	-	-	-	-	-	-
FBgn0004368	Pfk	protein_coding	2R:5997244-6004962	8.856E-03	1.808E-02	6.654E-02	1.267E-01	5.453E-04	1.957E-02	5.535E+00	3.538E-01	3.643E-01	5.037E-03		1.474E-02	1.175E-02	2.673E-03	1.144E-02	1.396E-03	2.317E-02	4.534E+00	9.997E-02	1.055E-01	7.084E-03
FBgn0004369	Pgi	protein_coding	2R:4798404-4801574	1.298E-02	3.140E-02	9.216E-02	1.539E-01	4.603E-04	1.613E-01	7.495E+00	1.316E-03	1.882E-03	8.960E-04		Not expressed in males	-	-	-	-	-	-	-	-	-
FBgn0004370	Pgm	protein_coding	3L:16119117-16121631	3.039E-03	4.383E-02	2.638E-01	3.177E-01	7.720E-05	9.197E-02	5.529E+00	9.266E-03	1.161E-02	3.679E-04		3.943E-03	2.558E-02	2.954E-01	3.379E-01	1.716E-04	9.710E-03	4.375E+00	1.932E-01	1.989E-01	4.520E-03
FBgn0004373	phl	protein_coding	X:2189498-2237903	1.489E-02	2.259E-02	2.819E-02	8.067E-02	7.339E-04	8.189E-03	8.259E+00	2.301E-01	2.408E-01	2.025E-02		9.700E-03	1.252E-02	1.696E-02	3.902E-02	8.624E-04	9.199E-03	8.583E+00	1.279E-02	1.489E-02	1.174E-02
FBgn0004374	phr	protein_coding	2R:3712793-3714824	4.830E-03	6.301E-02	3.908E-01	4.333E-01	8.533E-05	2.144E-01	5.959E+00	1.474E-07	4.523E-07	2.507E-04		1.961E-02	2.243E-02	1.215E-02	3.082E-02	9.732E-04	1.844E-01	5.874E+00	1.440E-10	7.409E-10	1.184E-03
FBgn0004378	Pig1	protein_coding	X:3142632-3143322	2.544E-02	4.201E-02	3.794E-02	9.381E-02	6.741E-04	1.174E-01	8.117E+00	3.404E-11	2.565E-10	2.411E-03		Not expressed in males	-	-	-	-	-	-	-	-	-
FBgn0004379	pim	protein_coding	2L:10362988-10364092	3.042E-02	5.729E-02	4.809E-02	1.064E-01	5.911E-04	1.638E-01	7.263E+00	4.268E-09	1.845E-08	2.067E-03		1.950E-03	2.382E-02	3.945E-01	4.307E-01	9.112E-05	9.884E-02	4.751E+00	8.773E-06	1.654E-05	2.196E-04
FBgn0004380	pip	protein_coding	3L:19291722-19330709	2.771E-02	1.206E-02	8.975E-05	3.847E-03	2.558E-03	6.124E-02	7.332E+00	3.106E-03	4.188E-03	5.038E-03		2.820E-02	1.096E-02	4.026E-05	1.241E-03	2.863E-03	4.145E-02	6.745E+00	7.041E-04	9.827E-04	7.573E-03
FBgn0004381	pk	protein_coding	2R:3038207-3110883	4.952E-03	1.928E-02	1.700E-01	2.306E-01	2.859E-04	6.247E-02	9.039E+00	1.730E-05	3.442E-05	8.823E-04		7.475E-03	1.043E-02	2.388E-02	5.009E-02	7.978E-04	2.517E-02	7.171E+00	9.462E-04	1.293E-03	3.305E-03
FBgn0004387	Pkc53E	protein_coding	2R:12812159-12832631	1.019E-02	3.800E-03	3.012E-05	2.170E-03	2.985E-03	8.371E-02	8.502E+00	8.526E-05	1.492E-04	1.355E-03		0.000E+00	4.508E-02	6.137E-01	6.349E-01	0.000E+00	1.567E-01	7.848E+00	8.424E-09	2.825E-08	0.000E+00
FBgn0004390	Pkc98E	protein_coding	3R:24864877-24874870	2.917E-02	6.688E-02	7.302E-02	1.342E-01	4.855E-04	7.768E-02	4.579E+00	1.317E-02	1.612E-02	4.180E-03		Not expressed in males	-	-	-	-	-	-	-	-	-
FBgn0004391	plu	protein_coding	2R:16150462-16151189	3.429E-03	1.097E-02	1.443E-01	2.066E-01	3.481E-04	5.604E-02	6.439E+00	3.615E-03	4.826E-03	6.811E-04		Not expressed in males	-	-	-	-	-	-	-	-	-
FBgn0004395	pn	protein_coding	X:2075243-2076949	1.328E-02	2.725E-02	6.285E-02	1.230E-01	5.424E-04	1.291E-01	5.959E+00	8.583E-06	1.818E-05	1.145E-03		Not expressed in males	-	-	-	-	-	-	-	-	-
FBgn0004397	pnr	protein_coding	3R:11851800-11867518	3.273E-02	1.617E-02	1.955E-04	6.113E-03	2.253E-03	1.658E-02	9.972E+00	3.058E-02	3.571E-02	2.197E-02		1.241E-02	3.738E-02	1.332E-01	1.779E-01	3.694E-04	2.315E-02	9.591E+00	2.274E-02	2.567E-02	5.965E-03
FBgn0004400	pnt	protein_coding	3R:19115952-19171889	2.294E-02	6.252E-02	9.926E-02	1.614E-01	4.084E-04	7.491E-01	7.887E+00	7.392E-09	3.025E-08	3.408E-04		Not expressed in males	-	-	-	-	-	-	-	-	-
FBgn0004401	polo	protein_coding	3L:20302753-20306566	6.935E-04	7.549E-03	3.823E-01	4.257E-01	1.023E-04	1.739E-02	1.094E+01	2.254E-03	3.099E-03	4.438E-04		2.963E-16	1.405E-02	5.412E-01	5.676E-01	2.348E-17	3.157E-03	9.983E+00	2.362E-01	2.416E-01	1.045E-15
FBgn0004406	Poxm	protein_coding	3R:4144746-4159514	6.148E-03	2.507E-02	1.789E-01	2.394E-01	2.730E-04	4.897E-02	4.433E+00	1.146E-02	1.415E-02	1.397E-03		Not expressed in males	-	-	-	-	-	-	-	-	-
FBgn0004419	Poxn	protein_coding	2R:11714197-11722560	6.751E-03	1.687E-02	8.988E-02	1.514E-01	4.454E-04	6.966E-02	1.263E+01	2.951E-12	3.079E-11	1.079E-03		2.058E-03	4.998E-03	9.406E-02	1.352E-01	4.584E-04	3.982E-03	9.632E+00	7.436E-02	7.944E-02	5.754E-03
FBgn0004429	Pp1-13C	protein_coding	X:15253133-15255094	2.202E-02	3.748E-02	3.917E-02	9.505E-02	6.540E-04	3.571E-01	1.104E+01	6.520E-22	1.409E-19	6.864E-04		5.024E-02	3.201E-02	8.570E-04	5.775E-03	1.747E-03	8.859E-01	1.082E+01	9.215E-23	2.089E-20	6.312E-04
FBgn0004432	Pp1alpha-96A	protein_coding	3R:20343991-20348053	5.882E-04	1.606E-03	1.064E-01	1.685E-01	4.077E-04	1.085E-02	1.333E+01	1.550E-09	7.492E-09	6.032E-04		7.119E-03	3.779E-03	3.100E-04	3.330E-03	2.097E-03	9.214E-03	1.262E+01	2.153E-09	8.195E-09	8.600E-03
FBgn0004436	Ppn	protein_coding	3R:24346386-24366046	4.435E-03	4.418E-03	6.603E-03	4.163E-02	1.118E-03	1.017E-02	1.068E+01	9.291E-02	1.020E-01	4.852E-03		1.685E-02	5.459E-03	1.089E-05	6.517E-04	3.436E-03	1.101E-02	1.065E+01	1.082E-02	1.273E-02	1.703E-02
FBgn0004456	Ptp61F	protein_coding	3L:1342492-1475257	1.252E-02	2.103E-02	4.142E-02	9.796E-02	6.627E-04	3.554E-02	4.448E+00	1.427E-05	2.886E-05	3.922E-03		2.108E-02	1.746E-02	3.129E-03	1.263E-02	1.344E-03	1.637E-02	3.962E+00	1.452E-02	1.679E-02	1.433E-02
FBgn0004462	PpV	protein_coding	X:6265097-6266948	5.150E-03	1.180E-02	6.308E-02	1.232E-01	4.858E-04	9.321E-02	8.558E+00	1.112E-05	2.296E-05	6.150E-04		8.106E-03	3.175E-02	1.711E-01	2.163E-01	2.842E-04	7.419E-02	6.873E+00	1.840E-05	3.293E-05	1.216E-03
FBgn0004463	PpY-55A	protein_coding	2R:13842900-13844075	1.973E-03	2.738E-02	3.250E-01	3.742E-01	8.021E-05	9.761E-02	6.806E+00	4.674E-13	6.087E-12	2.250E-04		Not expressed in males	-	-	-	-	-	-	-	-	-
FBgn0004465	pr	protein_coding	2L:20073718-20075458	4.072E-15	8.987E-03	5.401E-01	5.692E-01	5.044E-16	9.516E-03	9.214E+00	7.089E-03	9.062E-03	4.764E-15		1.289E-02	1.420E-02	1.065E-02	2.835E-02	1.010E-03	3.026E-02	8.530E+00	6.894E-04	9.639E-04	4.741E-03
FBgn0004507	prd	protein_coding	2L:12082994-12085827	1.305E-02	1.674E-02	1.755E-02	6.503E-02	8.678E-04	6.410E-02	1.189E+01	9.292E-09	3.714E-08	2.266E-03		2.182E-02	6.821E-03	8.458E-06	5.783E-04	3.560E-03	5.014E-02	1.219E+01	4.318E-12	3.268E-11	4.843E-03
FBgn0004510	Prm	protein_coding	3L:8725957-8738410	1.496E-02	2.088E-02	2.041E-02	6.994E-02	7.977E-04	9.567E-02	7.201E+00	3.825E-10	2.134E-09	1.741E-03		5.055E-03	1.000E-02	6.019E-02	9.679E-02	5.626E-04	1.178E-02	4.335E+00	3.722E-02	4.094E-02	4.777E-03
FBgn0004512	ptr	protein_coding	X:2238981-2260389	5.009E-02	6.091E-02	1.174E-02	5.365E-02	9.155E-04	4.413E-01	8.314E+00	9.338E-16	2.560E-14	1.264E-03		6.779E-03	5.622E-03	3.190E-03	1.280E-02	1.342E-03	5.856E-02	9.462E+00	5.771E-10	2.545E-09	1.289E-03
FBgn0004513	Pu	protein_coding	2R:17062819-17070113	2.418E-20	5.912E-02	5.625E-01	5.900E-01	4.552E-22	9.225E-02	3.969E+00	2.427E-05	4.711E-05	2.917E-21		0.000E+00	3.765E-02	6.107E-01	6.320E-01	0.000E+00	1.330E-01	4.596E+00	4.547E-07	1.076E-06	0.000E+00
FBgn0004516	pum	protein_coding	3R:4892064-5063404	2.406E-02	3.194E-02	1.918E-02	6.773E-02	8.386E-04	7.726E-02	9.906E+00	2.597E-07	7.573E-07	3.467E-03		9.361E-03	6.291E-03	1.134E-03	6.822E-03	1.656E-03	1.244E-02	1.081E+01	3.062E-07	7.456E-07	8.375E-03
FBgn0004556	put	protein_coding	3R:10444751-10451425	1.153E-02	1.092E-02	5.309E-03	3.669E-02	1.175E-03	6.617E-02	7.949E+00	1.334E-09	6.537E-09	1.940E-03		Not expressed in males	-	-	-	-	-	-	-	-	-
FBgn0004569	pwn	protein_coding	2R:3170076-3188311	1.943E-02	2.702E-02	2.397E-02	7.498E-02	8.005E-04	1.254E-01	5.078E+00	1.244E-05	2.543E-05	1.725E-03		2.708E-02	6.701E-02	9.233E-02	1.333E-01	4.499E-04	1.062E-01	5.507E+00	6.642E-08	1.860E-07	2.838E-03
FBgn0004574	px	protein_coding	2R:18381801-18449570	2.342E-03	8.424E-03	1.092E-01	1.712E-01	3.095E-04	1.763E-02	8.914E+00	3.572E-02	4.138E-02	1.479E-03		2.144E-03	4.205E-03	5.115E-02	8.629E-02	5.675E-04	2.721E-02	9.098E+00	6.970E-03	8.420E-03	8.768E-04
FBgn0004575	PyK	protein_coding	3R:18193257-18198468	8.084E-02	1.030E-01	1.755E-02	6.503E-02	8.737E-04	2.350E-01	7.958E+00	1.590E-07	4.856E-07	3.829E-03		3.199E-03	9.223E-03	9.292E-02	1.340E-01	3.861E-04	3.728E-02	9.063E+00	1.467E-06	3.149E-06	9.551E-04
FBgn0004583	qua	protein_coding	2L:17486805-17497208	5.611E-04	3.745E-02	5.126E-01	5.449E-01	1.668E-05	3.045E-02	4.888E+00	3.268E-02	3.799E-02	2.051E-04		1.935E-02	3.743E-02	4.962E-02	8.439E-02	5.753E-04	1.405E-02	4.747E+00	2.237E-01	2.292E-01	1.533E-02
FBgn0004584	r	protein_coding	X:16549391-16562745	0.000E+00	2.819E-02	6.608E-01	6.803E-01	0.000E+00	5.153E-02	8.805E+00	1.931E-05	3.818E-05	0.000E+00		1.482E-02	6.917E-02	2.002E-01	2.462E-01	2.384E-04	2.654E-01	5.568E+00	3.921E-11	2.266E-10	6.216E-04
FBgn0004587	ras	protein_coding	X:10638534-10643130	3.919E-03	1.154E-02	1.121E-01	1.741E-01	3.779E-04	2.751E-02	1.094E+01	1.559E-03	2.198E-03	1.586E-03		0.000E+00	1.761E-02	8.889E-01	8.930E-01	0.000E+00	7.963E-03	8.854E+00	9.339E-02	9.881E-02	0.000E+00
FBgn0004595	Ras85D	protein_coding	3R:5336282-5338789	3.115E-02	4.630E-02	2.905E-02	8.178E-02	7.488E-04	4.283E-01	4.225E+00	3.715E-05	6.955E-05	8.096E-04		4.290E-02	6.109E-02	2.520E-02	5.186E-02	7.816E-04	9.488E-01	5.606E+00	8.665E-04	1.191E-03	5.033E-04
FBgn0004597	Ras64B	protein_coding	3L:4139075-4141398	1.036E-02	3.079E-02	1.216E-01	1.836E-01	3.745E-04	4.856E-02	8.008E+00	1.762E-04	2.908E-04	2.375E-03		1.465E-02	1.234E-02	3.478E-03	1.346E-02	1.321E-03	2.190E-02	5.303E+00	1.599E-02	1.841E-02	7.447E-03
FBgn0004598	raw	protein_coding	2L:8709879-8740660	9.854E-03	1.192E-02	1.412E-02	5.844E-02	9.199E-04	2.236E-02	9.731E+00	2.784E-02	3.266E-02	4.906E-03		7.692E-03	4.896E-03	8.542E-04	5.768E-03	1.749E-03	3.744E-02	7.428E+00	3.022E-03	3.847E-03	2.287E-03
FBgn0004611	rb	protein_coding	X:4429667-4434659	4.967E-04	4.714E-03	2.271E-01	2.849E-01	1.173E-04	1.079E-02	9.415E+00	1.221E-02	1.504E-02	5.126E-04		5.725E-03	6.079E-03	8.700E-03	2.489E-02	1.048E-03	2.014E-02	8.698E+00	7.083E-03	8.548E-03	3.164E-03
FBgn0004618	rdgB	protein_coding	X:13656784-13673521	1.869E-02	5.988E-02	1.447E-01	2.070E-01	3.474E-04	6.613E-02	4.015E+00	1.001E-02	1.248E-02	3.146E-03		3.978E-02	2.836E-02	1.550E-03	8.160E-03	1.562E-03	1.072E-01	4.738E+00	9.407E-03	1.116E-02	4.130E-03
FBgn0004623	rec	protein_coding	3R:11648740-11658354	1.829E-02	4.373E-02	8.285E-02	1.442E-01	4.656E-04	9.829E-02	1.090E+01	2.211E-14	4.268E-13	2.072E-03		2.126E-03	5.070E-03	8.252E-02	1.227E-01	4.667E-04	2.911E-02	1.161E+01	1.353E-08	4.366E-08	8.128E-04
FBgn0004629	ref(2)P	protein_coding	2L:19542467-19545548	1.013E-02	1.463E-02	2.522E-02	7.647E-02	7.705E-04	1.970E-01	1.196E+01	6.636E-15	1.443E-13	5.725E-04		8.510E-03	1.900E-02	8.029E-02	1.202E-01	4.985E-04	9.053E-02	1.254E+01	1.039E-15	2.023E-14	1.046E-03
FBgn0004635	Rh2	protein_coding	3R:14725144-14726741	4.199E-02	9.607E-02	8.360E-02	1.450E-01	4.866E-04	7.205E-02	5.575E+00	2.028E-03	2.811E-03	6.487E-03		4.663E-02	4.720E-02	7.705E-03	2.302E-02	1.100E-03	2.621E-02	5.847E+00	3.668E-02	4.039E-02	1.980E-02
FBgn0004636	Rh3	protein_coding	3R:15906781-15908172	8.963E-04	3.572E-03	1.911E-01	2.511E-01	2.794E-04	1.355E-02	1.060E+01	5.572E-05	1.008E-04	7.366E-04		3.186E-03	3.921E-03	1.599E-02	3.728E-02	9.047E-04	1.679E-02	1.014E+01	7.333E-08	2.036E-07	2.112E-03
FBgn0004643	Rh4	protein_coding	3L:16845626-16855617	1.676E-02	3.344E-02	5.087E-02	1.099E-01	5.581E-04	1.330E-01	8.632E+00	1.312E-08	5.050E-08	1.403E-03		Not expressed in males	-	-	-	-	-	-	-	-	-
FBgn0004646	rib	protein_coding	2R:15157582-15168901	4.244E-02	4.262E-02	7.444E-03	4.336E-02	1.108E-03	4.171E-02	9.504E+00	3.832E-04	5.965E-04	1.133E-02		3.184E-04	5.820E-02	4.231E-01	4.571E-01	6.090E-06	2.589E-02	9.225E+00	4.992E-02	5.426E-02	1.369E-04
FBgn0004649	rk	protein_coding	2L:13982742-14001248	6.241E-03	7.529E-03	1.491E-02	6.009E-02	9.226E-04	3.925E-02	1.156E+01	4.646E-03	6.101E-03	1.770E-03		Not expressed in males	-	-	-	-	-	-	-	-	-
FBgn0004650	rl	protein_coding	2RHet:198175-252641	1.917E-03	5.842E-03	1.346E-01	1.971E-01	3.653E-04	1.211E-01	9.572E+00	1.759E-09	8.361E-09	1.762E-04		Not expressed in males	-	-	-	-	-	-	-	-	-
FBgn0004652	r-l	protein_coding	3R:16896278-16899041	6.796E-03	3.347E-02	1.503E-01	2.123E-01	2.260E-04	1.084E-02	3.970E+00	2.173E-01	2.279E-01	6.979E-03		Not expressed in males	-	-	-	-	-	-	-	-	-
FBgn0004654	Rm62	protein_coding	3R:1826147-1834301	4.961E-03	7.376E-03	2.828E-02	8.078E-02	7.487E-04	1.148E-01	9.933E+00	1.856E-03	2.587E-03	4.811E-04		3.387E-03	4.977E-03	2.252E-02	4.820E-02	7.575E-04	1.792E-01	1.054E+01	3.423E-09	1.243E-08	2.103E-04
FBgn0004655	ro	protein_coding	3R:22702492-22706893	7.883E-03	2.666E-02	1.361E-01	1.986E-01	3.291E-04	1.412E-01	9.020E+00	6.013E-07	1.605E-06	6.213E-04		1.974E-02	1.181E-02	6.179E-04	4.876E-03	1.861E-03	2.936E-02	5.354E+00	2.958E-02	3.289E-02	7.485E-03
FBgn0004657	rod	protein_coding	3R:27406672-27413966	0.000E+00	1.898E-02	9.171E-01	9.197E-01	0.000E+00	2.554E-02	8.944E+00	2.739E-02	3.215E-02	0.000E+00		0.000E+00	5.941E-02	5.947E-01	6.170E-01	0.000E+00	6.346E-03	8.220E+00	1.667E-01	1.725E-01	0.000E+00
FBgn0004666	amos	protein_coding	2L:18596135-18596921	5.911E-02	1.139E-01	4.718E-02	1.050E-01	5.775E-04	1.400E-01	6.409E+00	7.220E-05	1.275E-04	4.698E-03		Not expressed in males	-	-	-	-	-	-	-	-	-
FBgn0004687	RpLP2	protein_coding	2R:12473633-12474237	3.045E-03	2.071E-03	1.219E-03	1.783E-02	1.636E-03	5.589E-03	1.188E+01	8.613E-05	1.506E-04	6.064E-03		3.934E-03	2.496E-03	8.401E-04	5.729E-03	1.754E-03	9.966E-03	1.151E+01	2.148E-08	6.638E-08	4.394E-03
FBgn0004784	RpII18	protein_coding	3R:1197516-1198119	1.951E-02	6.134E-02	1.374E-01	2.000E-01	3.539E-04	1.439E-01	8.025E+00	1.091E-08	4.275E-08	1.509E-03		7.521E-03	7.562E-03	7.315E-03	2.217E-02	1.107E-03	2.093E-02	9.222E+00	1.347E-04	2.111E-04	4.001E-03
FBgn0004795	RpII215	protein_coding	X:11456832-11464359	9.839E-03	2.665E-02	1.144E-01	1.767E-01	4.110E-04	6.998E-02	1.062E+01	1.255E-08	4.856E-08	1.565E-03		3.211E-02	8.151E-03	1.690E-06	2.455E-04	4.386E-03	6.633E-02	7.899E+00	1.728E-06	3.672E-06	5.389E-03
FBgn0004797	RpI135	protein_coding	2L:404284-407969	6.814E-03	1.032E-02	3.081E-02	8.459E-02	7.348E-04	1.360E-01	8.958E+00	1.338E-10	8.531E-10	5.578E-04		5.685E-02	5.717E-02	6.855E-03	2.130E-02	1.107E-03	1.924E-01	8.613E+00	1.051E-13	1.195E-12	3.289E-03
FBgn0004811	RpL4	protein_coding	3R:23748542-23750610	2.499E-02	4.103E-02	3.619E-02	9.151E-02	6.779E-04	7.262E-02	8.175E+00	3.197E-06	7.427E-06	3.830E-03		4.629E-03	5.810E-03	1.646E-02	3.815E-02	8.869E-04	7.390E-02	7.539E+00	2.013E-06	4.235E-06	6.973E-04
FBgn0004828	rst	protein_coding	X:2844431-2867867	2.488E-03	3.575E-03	2.626E-02	7.803E-02	7.745E-04	2.008E-02	1.242E+01	5.946E-02	6.677E-02	1.379E-03		1.605E-03	6.753E-03	1.885E-01	2.344E-01	2.645E-04	2.981E-03	1.188E+01	3.824E-01	3.865E-01	5.992E-03
FBgn0004832	rt	protein_coding	3L:11577221-11580870	1.233E-02	5.979E-02	2.122E-01	2.707E-01	2.295E-04	3.255E-02	4.982E+00	1.204E-01	1.301E-01	4.215E-03		0.000E+00	1.475E-02	6.788E-01	6.947E-01	0.000E+00	2.991E-02	4.972E+00	4.298E-03	5.353E-03	0.000E+00
FBgn0004837	ru	protein_coding	3L:1370627-1387437	3.078E-02	4.356E-02	2.025E-02	6.973E-02	7.863E-04	8.648E-02	6.790E+00	2.034E-04	3.309E-04	3.961E-03		8.117E-03	4.876E-02	2.817E-01	3.244E-01	1.853E-04	3.262E-02	4.887E+00	5.695E-03	6.972E-03	2.770E-03
FBgn0004839	run	protein_coding	X:20561696-20568348	5.022E-03	9.055E-02	4.308E-01	4.694E-01	6.173E-05	2.503E-02	3.627E+00	8.300E-04	1.223E-03	2.233E-03		Not expressed in males	-	-	-	-	-	-	-	-	-
FBgn0004852	rut	protein_coding	X:14681510-14720106	5.453E-02	6.520E-02	1.441E-02	5.903E-02	9.311E-04	3.971E-01	6.399E+00	3.757E-07	1.055E-06	1.529E-03		3.099E-02	1.622E-02	2.788E-04	3.139E-03	2.126E-03	1.934E-01	7.495E+00	1.260E-06	2.737E-06	1.783E-03
FBgn0004855	rux	protein_coding	X:5929785-5931833	2.033E-03	1.327E-02	2.664E-01	3.204E-01	1.705E-04	2.054E-02	9.798E+00	2.035E-03	2.820E-03	1.102E-03		1.225E-02	2.035E-02	3.121E-02	6.022E-02	6.701E-04	7.144E-02	8.384E+00	6.532E-05	1.068E-04	1.909E-03
FBgn0004856	ry	protein_coding	3R:8858249-8863742	3.305E-04	4.683E-03	4.158E-01	4.558E-01	7.855E-05	1.088E-02	9.038E+00	2.594E-03	3.539E-03	3.382E-04		8.032E-03	1.197E-02	2.940E-02	5.762E-02	7.467E-04	1.614E-02	7.319E+00	4.414E-02	4.823E-02	5.538E-03
FBgn0004859	S	protein_coding	2L:1049673-1077815	2.821E-02	4.716E-02	3.920E-02	9.505E-02	6.659E-04	8.403E-02	7.751E+00	1.834E-04	3.018E-04	3.737E-03		6.874E-03	2.516E-02	1.764E-01	2.217E-01	3.042E-04	3.961E-02	7.185E+00	2.309E-03	2.986E-03	1.932E-03
FBgn0004861	sad	protein_coding	3R:7702956-7705476	4.536E-02	5.560E-02	1.580E-02	6.185E-02	9.082E-04	9.005E-02	5.929E+00	6.511E-03	8.370E-03	5.607E-03		1.638E-02	7.150E-03	9.091E-05	1.765E-03	2.550E-03	4.417E-02	5.752E+00	6.899E-03	8.339E-03	4.128E-03
FBgn0004864	sala	protein_coding	2L:11484706-11486949	6.134E-04	1.199E-02	4.044E-01	4.457E-01	5.695E-05	4.182E-03	8.752E+00	3.447E-01	3.553E-01	1.633E-03		6.066E-03	1.439E-02	8.934E-02	1.301E-01	4.692E-04	1.567E-02	7.183E+00	5.814E-03	7.106E-03	4.308E-03
FBgn0004867	sax	protein_coding	2R:3693988-3697572	1.634E-03	1.527E-03	5.352E-03	3.681E-02	1.192E-03	7.694E-04	1.383E+01	1.034E-01	1.128E-01	2.364E-02		2.414E-03	1.920E-03	2.583E-03	1.125E-02	1.400E-03	7.330E-03	1.299E+01	8.080E-08	2.219E-07	3.666E-03
FBgn0004868	Sb	protein_coding	3R:11941882-11971006	7.716E-03	7.548E-03	6.025E-03	3.957E-02	1.138E-03	1.087E-02	1.139E+01	2.685E-03	3.658E-03	7.899E-03		1.825E-03	7.010E-03	1.809E-01	2.265E-01	2.898E-04	8.464E-03	1.092E+01	5.966E-02	6.433E-02	2.400E-03
FBgn0004872	sbr	protein_coding	X:10726784-10741125	9.792E-03	4.778E-03	1.974E-04	6.121E-03	2.281E-03	6.111E-02	9.495E+00	3.565E-09	1.578E-08	1.784E-03		Not expressed in males	-	-	-	-	-	-	-	-	-
FBgn0004875	sca	protein_coding	2R:8668045-8689515	5.885E-03	1.835E-02	1.218E-01	1.838E-01	3.570E-04	2.040E-02	8.663E+00	5.691E-02	6.408E-02	3.211E-03		1.024E-02	3.496E-02	1.602E-01	2.053E-01	3.260E-04	2.866E-02	7.682E+00	1.642E-02	1.885E-02	3.976E-03
FBgn0004880	scb	protein_coding	2R:11136288-11146003	1.131E-01	1.284E-01	1.170E-02	5.351E-02	9.810E-04	1.840E-01	5.960E+00	3.138E-04	4.950E-04	6.845E-03		1.122E-02	5.737E-03	2.413E-04	2.902E-03	2.178E-03	6.556E-02	7.411E+00	2.917E-05	5.040E-05	1.905E-03
FBgn0004885	Sce	protein_coding	3R:23506152-23507751	1.661E-02	2.776E-02	4.086E-02	9.748E-02	6.659E-04	3.799E-01	7.557E+00	1.771E-09	8.389E-09	4.866E-04		9.363E-03	1.322E-02	2.324E-02	4.923E-02	7.882E-04	2.165E-01	8.262E+00	3.661E-10	1.688E-09	4.813E-04
FBgn0004888	Scm	protein_coding	3R:5459080-5463333	8.892E-04	3.267E-03	1.619E-01	2.236E-01	3.030E-04	1.754E-02	1.171E+01	1.204E-10	7.805E-10	5.641E-04		1.359E-02	6.174E-03	1.143E-04	1.995E-03	2.450E-03	2.179E-02	1.179E+01	4.053E-09	1.449E-08	6.940E-03
FBgn0004893	Scr	protein_coding	3R:2648841-2675703	2.335E-02	2.843E-02	1.543E-02	6.132E-02	9.142E-04	9.080E-02	5.451E+00	1.210E-04	2.061E-04	2.863E-03		0.000E+00	2.339E-02	8.547E-01	8.604E-01	0.000E+00	1.920E-02	5.827E+00	4.229E-03	5.271E-03	0.000E+00
FBgn0004903	sd	protein_coding	X:15698402-15721714	3.069E-02	8.647E-02	1.164E-01	1.786E-01	3.951E-04	3.264E-01	7.489E+00	2.729E-04	4.354E-04	1.047E-03		2.646E-02	7.596E-02	1.153E-01	1.585E-01	3.877E-04	2.988E-01	8.208E+00	1.162E-05	2.151E-05	9.857E-04
FBgn0004908	RanGAP	protein_coding	2L:19441958-19447317	5.929E-03	1.665E-02	1.114E-01	1.734E-01	3.963E-04	2.072E-02	6.720E+00	7.351E-03	9.373E-03	3.184E-03		5.645E-03	1.496E-02	9.945E-02	1.412E-01	4.201E-04	2.500E-02	7.812E+00	3.698E-04	5.396E-04	2.513E-03
FBgn0004913	sei	protein_coding	2R:19934933-19940558	6.962E-03	9.070E-03	1.654E-02	6.328E-02	8.544E-04	6.391E-02	9.510E+00	3.996E-05	7.451E-05	1.213E-03		5.048E-04	1.463E-02	4.221E-01	4.563E-01	3.841E-05	3.195E-02	7.668E+00	3.076E-04	4.542E-04	1.758E-04
FBgn0004914	Jon99Cii	protein_coding	3R:25749475-25750337	9.694E-04	6.261E-03	2.960E-01	3.487E-01	1.724E-04	6.923E-03	9.610E+00	9.311E-02	1.022E-01	1.559E-03		3.469E-03	1.300E-02	1.815E-01	2.271E-01	2.970E-04	2.817E-02	9.373E+00	3.577E-03	4.506E-03	1.371E-03
FBgn0004915	Jon99Ciii	protein_coding	3R:25747937-25749177	4.422E-03	7.497E-03	4.031E-02	9.661E-02	6.565E-04	2.941E-02	9.926E+00	6.784E-05	1.206E-04	1.673E-03		7.040E-20	3.869E-03	6.393E-01	6.582E-01	2.025E-20	9.254E-03	9.838E+00	2.068E-04	3.141E-04	8.469E-20
FBgn0004921	Jon99Ci	protein_coding	3R:25750947-25751911	9.940E-04	2.212E-03	6.667E-02	1.269E-01	5.001E-04	2.554E-03	1.215E+01	4.513E-02	5.158E-02	4.332E-03		3.741E-04	1.615E-03	1.738E-01	2.189E-01	2.579E-04	5.599E-03	1.239E+01	1.969E-02	2.240E-02	7.436E-04
FBgn0004924	sesB	protein_coding	X:10674925-10680991	7.969E-03	1.797E-02	7.408E-02	1.352E-01	4.936E-04	6.595E-02	1.038E+01	3.510E-04	5.497E-04	1.345E-03		1.756E-02	1.130E-02	9.095E-04	5.997E-03	1.729E-03	3.037E-02	7.591E+00	6.658E-02	7.149E-02	6.435E-03
FBgn0004926	sev	protein_coding	X:10965473-10980332	4.060E-03	4.254E-03	8.656E-03	4.622E-02	1.062E-03	5.846E-03	1.163E+01	1.902E-03	2.648E-03	7.729E-03		2.304E-03	4.600E-03	5.490E-02	9.046E-02	5.575E-04	7.324E-03	1.051E+01	3.220E-04	4.742E-04	3.501E-03
FBgn0005198	sgg	protein_coding	X:2527984-2573586	3.788E-03	6.956E-03	4.533E-02	1.031E-01	6.062E-04	1.385E-02	8.154E+00	3.102E-02	3.618E-02	3.044E-03		3.571E-03	6.734E-03	5.189E-02	8.708E-02	5.903E-04	4.985E-03	6.758E+00	2.157E-01	2.212E-01	7.974E-03
FBgn0005322	Sgs1	protein_coding	2L:4937408-4941423	0.000E+00	9.050E-03	5.974E-01	6.213E-01	0.000E+00	1.652E-02	9.812E+00	3.754E-04	5.850E-04	0.000E+00		1.198E-02	1.308E-02	9.330E-03	2.603E-02	1.020E-03	9.950E-03	8.955E+00	2.369E-04	3.560E-04	1.341E-02
FBgn0005355	Sgs3	protein_coding	3L:11505320-11506502	3.002E-03	8.133E-03	1.051E-01	1.671E-01	4.109E-04	1.368E-02	7.287E+00	7.776E-03	9.878E-03	2.443E-03		0.000E+00	6.789E-03	9.195E-01	9.222E-01	0.000E+00	1.033E-02	5.362E+00	2.869E-02	3.195E-02	0.000E+00
FBgn0005386	Sgs4	protein_coding	X:3143533-3145073	2.191E-02	4.603E-02	6.609E-02	1.263E-01	5.298E-04	1.253E-01	5.327E+00	2.150E-02	2.561E-02	1.947E-03		Not expressed in males	-	-	-	-	-	-	-	-	-
FBgn0005390	Sgs5	protein_coding	3R:13421083-13421834	4.883E-03	9.533E-03	6.001E-02	1.197E-01	5.702E-04	8.185E-02	9.388E+00	2.189E-07	6.478E-07	6.642E-04		Not expressed in males	-	-	-	-	-	-	-	-	-
FBgn0005391	Sgs7	protein_coding	3L:11502960-11503347	1.398E-03	4.100E-03	1.144E-01	1.767E-01	3.797E-04	1.820E-02	1.408E+01	1.084E-07	3.429E-07	8.551E-04		Not expressed in males	-	-	-	-	-	-	-	-	-
FBgn0005411	Sgs8	protein_coding	3L:11502066-11502494	1.117E-03	3.036E-03	1.147E-01	1.769E-01	4.096E-04	6.733E-03	1.061E+01	4.838E-07	1.324E-06	1.847E-03		1.754E-03	4.172E-03	9.047E-02	1.313E-01	4.680E-04	5.764E-03	9.380E+00	4.324E-04	6.243E-04	3.387E-03
FBgn0005533	Sh	protein_coding	X:17818339-17957278	4.107E-04	5.905E-04	2.646E-02	7.842E-02	7.741E-04	2.038E-04	1.390E+01	1.891E-01	1.995E-01	2.243E-02		3.219E-04	1.121E-03	1.606E-01	2.057E-01	3.196E-04	3.062E-03	1.357E+01	3.587E-04	5.244E-04	1.170E-03
FBgn0005585	sha	protein_coding	2R:7211818-7223968	1.048E-02	5.127E-03	1.838E-04	5.969E-03	2.275E-03	7.840E-03	1.166E+01	8.989E-05	1.566E-04	1.488E-02		1.277E-02	5.262E-03	6.388E-05	1.529E-03	2.702E-03	2.281E-02	1.157E+01	7.190E-09	2.451E-08	6.234E-03
FBgn0005586	Shaw	protein_coding	2L:3718184-3729145	3.952E-02	5.821E-02	2.474E-02	7.596E-02	7.557E-04	1.604E-01	7.811E+00	1.225E-07	3.831E-07	2.742E-03		3.057E-03	4.943E-03	3.637E-02	6.716E-02	6.884E-04	3.969E-02	8.817E+00	2.414E-05	4.225E-05	8.574E-04
FBgn0005593	shd	protein_coding	3L:14607557-14615305	1.807E-04	8.143E-04	2.150E-01	2.734E-01	2.471E-04	3.198E-04	1.386E+01	1.054E-01	1.149E-01	6.291E-03		2.863E-04	4.921E-04	4.402E-02	7.723E-02	6.476E-04	2.603E-03	1.338E+01	1.046E-03	1.417E-03	1.224E-03
FBgn0005596	shf	protein_coding	X:6665495-6673692	1.240E-02	2.774E-02	7.141E-02	1.323E-01	4.976E-04	3.159E-02	8.573E+00	6.530E-08	2.171E-07	4.369E-03		1.052E-03	2.905E-02	4.568E-01	4.888E-01	4.032E-05	2.144E-02	4.864E+00	3.966E-03	4.968E-03	5.465E-04
FBgn0005612	shg	protein_coding	2R:16937158-16944702	4.338E-02	2.948E-02	1.197E-03	1.773E-02	1.638E-03	1.504E-01	7.189E+00	2.227E-08	8.163E-08	3.211E-03		7.243E-02	3.537E-02	1.808E-04	2.496E-03	2.279E-03	7.307E-02	6.658E+00	2.080E-05	3.686E-05	1.103E-02
FBgn0005614	shi	protein_coding	X:15786148-15800749	3.170E-02	3.061E-02	6.051E-03	3.960E-02	1.153E-03	2.127E-01	9.694E+00	4.232E-15	9.644E-14	1.659E-03		7.631E-03	7.723E-03	7.373E-03	2.230E-02	1.100E-03	2.264E-01	1.037E+01	3.901E-17	1.211E-15	3.752E-04
FBgn0005616	shn	protein_coding	2R:7046590-7104899	2.551E-02	2.814E-02	9.877E-03	4.946E-02	1.009E-03	2.772E-02	3.576E+00	5.562E-02	6.268E-02	1.024E-02		9.016E-03	2.336E-02	1.013E-01	1.431E-01	4.295E-04	2.114E-02	4.901E+00	5.576E-02	6.025E-02	4.748E-03
FBgn0005619	shu	protein_coding	2R:19728983-19730809	8.668E-02	1.202E-01	2.364E-02	7.464E-02	8.028E-04	1.056E-01	4.125E+00	1.336E-03	1.908E-03	9.134E-03		0.000E+00	5.091E-02	6.414E-01	6.602E-01	0.000E+00	1.361E-01	5.826E+00	2.023E-06	4.252E-06	0.000E+00
FBgn0005624	sina	protein_coding	3L:16846850-16851812	0.000E+00	2.243E-02	9.414E-01	9.428E-01	0.000E+00	1.461E-01	5.379E+00	9.574E-06	2.008E-05	0.000E+00		Not expressed in males	-	-	-	-	-	-	-	-	-
FBgn0005630	sisA	protein_coding	X:11215611-11216390	5.418E-02	5.537E-02	6.906E-03	4.219E-02	1.089E-03	3.664E-03	1.046E+01	5.017E-01	5.105E-01	1.646E-01		3.058E-03	4.468E-02	3.956E-01	4.316E-01	7.618E-05	3.134E-02	9.068E+00	2.022E-01	2.078E-01	1.086E-03
FBgn0005631	skd	protein_coding	3L:20985913-21020534	5.639E-02	8.729E-02	3.177E-02	8.630E-02	7.191E-04	2.166E-01	5.024E+00	2.062E-07	6.141E-07	2.898E-03		7.721E-03	3.040E-02	1.926E-01	2.384E-01	2.827E-04	4.965E-02	5.765E+00	1.907E-03	2.489E-03	1.731E-03
FBgn0005632	sl	protein_coding	X:16244347-16250515	1.217E-02	4.564E-02	1.491E-01	2.111E-01	2.967E-04	1.781E-02	8.175E+00	1.889E-01	1.994E-01	7.605E-03		2.884E-02	1.042E-01	1.633E-01	2.083E-01	3.081E-04	4.205E-02	6.234E+00	3.946E-02	4.330E-02	7.635E-03
FBgn0005633	slgA	protein_coding	X:21245028-21256186	1.394E-01	1.123E-01	2.802E-03	2.637E-02	1.382E-03	2.113E-01	1.167E+01	4.340E-17	1.804E-15	7.346E-03		2.744E-01	1.159E-01	7.086E-05	1.585E-03	2.634E-03	2.074E-01	1.191E+01	9.217E-17	2.525E-15	1.473E-02
FBgn0005636	slo	protein_coding	3R:20488212-20537317	0.000E+00	6.051E-02	8.149E-01	8.226E-01	0.000E+00	4.953E-02	3.626E+00	3.550E-02	4.112E-02	0.000E+00		7.796E-18	9.303E-02	6.079E-01	6.291E-01	9.328E-20	6.664E-02	4.792E+00	3.421E-02	3.779E-02	1.302E-18
FBgn0005638	slp1	protein_coding	2L:3825674-3827099	4.555E-02	1.325E-01	1.246E-01	1.869E-01	3.827E-04	4.723E-02	3.638E+00	7.805E-03	9.909E-03	1.074E-02		Not expressed in males	-	-	-	-	-	-	-	-	-
FBgn0005640	sm	protein_coding	2R:15405368-15519013	4.500E-03	6.658E-03	2.506E-02	7.630E-02	7.523E-04	1.445E-03	9.375E+00	3.883E-01	3.983E-01	3.467E-02		5.269E-04	8.169E-03	3.352E-01	3.754E-01	7.179E-05	3.582E-02	8.847E+00	4.469E-06	8.872E-06	1.637E-04
FBgn0005642	smo	protein_coding	2L:277581-282167	1.000E-02	1.863E-02	4.890E-02	1.075E-01	5.978E-04	9.383E-02	9.061E+00	1.245E-05	2.544E-05	1.187E-03		9.214E-03	1.592E-02	4.185E-02	7.446E-02	6.444E-04	1.203E-02	5.782E+00	5.255E-02	5.694E-02	8.524E-03
FBgn0005648	sn	protein_coding	X:7858056-7880634	5.378E-03	4.085E-03	1.966E-03	2.222E-02	1.465E-03	7.545E-02	9.328E+00	2.381E-07	6.981E-07	7.933E-04		5.116E-03	9.310E-03	4.820E-02	8.248E-02	6.116E-04	3.310E-02	7.904E+00	1.735E-03	2.274E-03	1.720E-03
FBgn0005649	sna	protein_coding	2L:15476592-15478260	2.093E-02	3.033E-02	2.471E-02	7.596E-02	7.681E-04	1.274E-02	9.396E+00	1.843E-01	1.948E-01	1.828E-02		0.000E+00	2.231E-02	6.908E-01	7.064E-01	0.000E+00	6.867E-03	8.017E+00	3.512E-01	3.555E-01	0.000E+00
FBgn0005655	snf	protein_coding	X:5203274-5204534	6.824E-03	1.410E-02	6.573E-02	1.259E-01	5.389E-04	7.740E-02	1.066E+01	1.470E-10	9.266E-10	9.814E-04		Not expressed in males	-	-	-	-	-	-	-	-	-
FBgn0005664	snk	protein_coding	3R:8865886-8868492	1.081E-01	9.031E-02	3.276E-03	2.869E-02	1.332E-03	1.192E+00	4.309E+00	3.104E-11	2.353E-10	1.009E-03		1.124E-03	1.783E-01	4.422E-01	4.752E-01	7.015E-06	1.911E+00	4.338E+00	1.386E-12	1.179E-11	6.546E-06
FBgn0005666	stwl	protein_coding	3L:14396029-14403039	2.286E-02	2.492E-02	1.008E-02	4.999E-02	1.021E-03	6.341E-02	1.134E+01	4.691E-07	1.288E-06	4.013E-03		6.423E-03	4.649E-03	1.677E-03	8.579E-03	1.538E-03	5.217E-02	1.182E+01	1.230E-09	4.992E-09	1.371E-03
FBgn0005670	so	protein_coding	2R:3306854-3322377	4.559E-02	2.785E-02	6.814E-04	1.227E-02	1.822E-03	4.184E+00	7.870E+00	1.983E-18	1.220E-16	1.213E-04		1.803E-01	7.836E-02	8.713E-05	1.721E-03	2.561E-03	3.746E+00	7.484E+00	2.131E-22	3.852E-20	5.356E-04
FBgn0005671	Sod	protein_coding	3L:11105380-11106840	0.000E+00	1.550E-01	6.172E-01	6.402E-01	0.000E+00	3.878E-17	1.023E+01	6.014E-01	6.081E-01	0.000E+00		4.898E-18	9.049E-02	9.056E-01	9.088E-01	6.025E-20	0.000E+00	9.813E+00	7.913E-01	7.920E-01	Inf
FBgn0005672	sog	protein_coding	X:15497315-15527467	8.700E-03	6.274E-03	1.634E-03	2.040E-02	1.544E-03	2.915E-02	9.492E+00	1.007E-09	5.085E-09	3.322E-03		1.314E-03	1.936E-03	2.636E-02	5.347E-02	7.556E-04	2.435E-02	9.414E+00	6.612E-13	6.092E-12	6.008E-04
FBgn0005674	sol	protein_coding	X:21221306-21228939	3.116E-03	6.180E-03	5.955E-02	1.191E-01	5.612E-04	7.843E-03	1.090E+01	1.204E-02	1.483E-02	4.422E-03		5.688E-03	8.472E-03	2.621E-02	5.326E-02	7.474E-04	4.257E-02	9.779E+00	1.046E-04	1.664E-04	1.487E-03
FBgn0005683	spir	protein_coding	2L:20311218-20348386	7.860E-02	6.341E-02	2.636E-03	2.557E-02	1.380E-03	2.563E-01	6.642E+00	5.183E-09	2.207E-08	3.414E-03		Not expressed in males	-	-	-	-	-	-	-	-	-
FBgn0005695	spn-A	protein_coding	3R:25880417-25881759	5.892E-03	2.355E-02	1.711E-01	2.316E-01	2.785E-04	7.954E-02	1.057E+01	1.883E-11	1.503E-10	8.245E-04		5.063E-03	1.495E-02	1.304E-01	1.752E-01	3.770E-04	6.832E-02	6.368E+00	4.597E-06	9.097E-06	8.249E-04
FBgn0005696	spn-B	protein_coding	3R:10153772-10155330	2.053E-02	5.769E-02	1.220E-01	1.841E-01	3.961E-04	1.336E-01	7.013E+00	7.562E-09	3.081E-08	1.710E-03		Not expressed in males	-	-	-	-	-	-	-	-	-
FBgn0005771	spn-D	protein_coding	3R:22991437-22992844	5.031E-03	1.698E-02	1.571E-01	2.191E-01	3.298E-04	6.472E-02	9.206E+00	2.539E-02	2.991E-02	8.653E-04		4.160E-03	7.122E-03	4.345E-02	7.653E-02	6.503E-04	7.258E-02	9.310E+00	4.130E-03	5.160E-03	6.380E-04
FBgn0005775	spn-E	protein_coding	3R:11663140-11670137	4.344E-02	1.564E-01	1.729E-01	2.336E-01	3.091E-04	1.304E-18	3.742E+00	5.411E-01	5.492E-01	3.707E+14		2.248E-02	1.207E-01	2.313E-01	2.762E-01	2.074E-04	2.876E-01	4.976E+00	4.246E-02	4.649E-02	8.700E-04
FBgn0005777	spo	protein_coding	3L:5583182-5585671	4.795E-03	7.443E-03	2.762E-02	8.019E-02	7.171E-04	2.795E-02	9.284E+00	2.825E-06	6.629E-06	1.909E-03		3.497E-03	3.988E-03	1.191E-02	3.041E-02	9.760E-04	5.576E-03	7.988E+00	1.096E-01	1.153E-01	6.982E-03
FBgn0008635	spz	protein_coding	3R:22890711-22895792	1.989E-03	8.581E-03	2.091E-01	2.676E-01	2.580E-04	3.190E-03	9.255E+00	2.277E-01	2.384E-01	6.939E-03		4.236E-03	7.124E-03	3.798E-02	6.927E-02	6.618E-04	2.069E-02	8.891E+00	4.895E-04	7.008E-04	2.279E-03
FBgn0010014	sr	protein_coding	3R:13916524-13961305	2.312E-02	3.515E-02	2.778E-02	8.029E-02	7.322E-04	1.109E-01	8.567E+00	1.514E-06	3.734E-06	2.321E-03		5.923E-03	3.243E-03	3.629E-04	3.659E-03	2.033E-03	2.253E-02	9.511E+00	1.511E-02	1.744E-02	2.927E-03
FBgn0010015	Btk29A	protein_coding	2L:8258372-8301079	8.656E-02	7.942E-02	4.809E-03	3.472E-02	1.213E-03	2.219E-01	6.269E+00	6.676E-07	1.761E-06	4.341E-03		1.299E-04	4.627E-02	5.285E-01	5.562E-01	3.124E-06	7.460E-02	7.359E+00	1.481E-04	2.304E-04	1.938E-05
FBgn0010019	srp	protein_coding	3R:11811873-11829803	8.461E-03	6.069E-03	1.603E-03	2.025E-02	1.552E-03	4.925E-03	1.388E+01	1.371E-04	2.313E-04	1.912E-02		2.509E-03	1.677E-03	1.110E-03	6.704E-03	1.665E-03	5.776E-03	1.413E+01	1.212E-05	2.235E-05	4.835E-03
FBgn0010038	Sry-alpha	protein_coding	3R:25866938-25868793	1.464E-01	1.260E-01	3.354E-03	2.920E-02	1.293E-03	2.551E+00	5.513E+00	2.092E-15	5.242E-14	6.386E-04		1.492E-01	6.960E-02	1.384E-04	2.182E-03	2.386E-03	4.762E+00	5.847E+00	6.674E-23	1.597E-20	3.487E-04
FBgn0010039	Sry-beta	protein_coding	3R:25865440-25866753	2.023E-02	2.737E-02	2.106E-02	7.069E-02	8.225E-04	6.260E-01	8.439E+00	8.831E-23	2.673E-20	3.596E-04		4.554E-03	4.811E-03	9.059E-03	2.557E-02	1.054E-03	1.485E-01	9.011E+00	2.553E-20	2.187E-18	3.413E-04
FBgn0010041	Sry-delta	protein_coding	3R:25869062-25870608	8.098E-01	8.198E-01	6.878E-03	4.219E-02	1.100E-03	5.331E-01	3.114E+00	5.581E-12	5.245E-11	1.691E-02		1.373E-01	1.688E-01	1.582E-02	3.700E-02	9.053E-04	2.143E+00	3.692E+00	2.151E-16	5.272E-15	7.132E-04
FBgn0010043	ss	protein_coding	3R:12200155-12229412	8.856E-03	5.390E-02	2.830E-01	3.364E-01	1.829E-04	8.661E-02	3.983E+00	6.289E-08	2.100E-07	1.138E-03		2.803E-02	2.617E-02	5.508E-03	1.840E-02	1.192E-03	1.012E-01	3.668E+00	7.242E-10	3.108E-09	3.083E-03
FBgn0010044	sqh	protein_coding	X:6117093-6119173	1.281E-02	1.137E-01	3.380E-01	3.860E-01	1.254E-04	7.334E-02	3.624E+00	4.403E-02	5.040E-02	1.944E-03		9.103E-02	1.692E-01	5.359E-02	8.878E-02	5.987E-04	1.014E-01	3.741E+00	8.663E-04	1.191E-03	9.994E-03
FBgn0010051	st	protein_coding	3L:16490750-16493560	4.477E-16	3.711E-02	5.624E-01	5.899E-01	1.343E-17	2.744E-02	5.996E+00	1.044E-01	1.138E-01	1.816E-16		Not expressed in males	-	-	-	-	-	-	-	-	-
FBgn0010053	sta	protein_coding	X:1375829-1377446	7.802E-03	5.668E-02	2.604E-01	3.146E-01	1.532E-04	6.248E-01	1.034E+01	2.517E-20	3.072E-18	1.390E-04		2.019E-02	1.680E-02	3.239E-03	1.290E-02	1.338E-03	2.288E-01	1.099E+01	1.771E-19	1.162E-17	9.823E-04
FBgn0010078	stau	protein_coding	2R:14005400-14013284	3.760E-04	4.145E-04	1.032E-02	5.050E-02	1.010E-03	5.423E-06	1.404E+01	4.619E-01	4.714E-01	7.716E-01		2.287E-04	2.817E-03	3.896E-01	4.261E-01	9.037E-05	3.005E-03	1.369E+01	3.826E-03	4.805E-03	8.473E-04
FBgn0010097	stg	protein_coding	3R:25077547-25081522	2.379E-02	4.777E-02	6.261E-02	1.227E-01	5.543E-04	2.796E-01	7.997E+00	7.946E-09	3.225E-08	9.471E-04		Not expressed in males	-	-	-	-	-	-	-	-	-
FBgn0010100	stil	protein_coding	2R:8457871-8459388	2.019E-02	2.495E-02	1.561E-02	6.161E-02	9.009E-04	1.723E-02	1.287E+01	4.255E-04	6.578E-04	1.304E-02		1.243E-02	6.692E-03	3.294E-04	3.436E-03	2.067E-03	8.122E-03	1.328E+01	8.143E-04	1.123E-03	1.703E-02
FBgn0010113	sub	protein_coding	2R:13633004-13635583	3.821E-03	2.147E-02	2.683E-01	3.223E-01	1.981E-04	1.349E-01	7.610E+00	1.145E-03	1.652E-03	3.154E-04		1.897E-02	4.830E-02	7.619E-02	1.155E-01	4.371E-04	9.531E-02	5.794E+00	2.968E-02	3.301E-02	2.215E-03
FBgn0010114	Su(dx)	protein_coding	2L:2037713-2044372	2.691E-02	3.566E-02	2.035E-02	6.981E-02	8.399E-04	1.121E-01	6.135E+00	5.873E-06	1.291E-05	2.673E-03		6.745E-03	7.387E-03	1.037E-02	2.791E-02	1.016E-03	6.882E-02	8.190E+00	3.975E-06	7.961E-06	1.091E-03
FBgn0010173	su(f)	protein_coding	XHet:75588-80249	1.628E-02	2.625E-02	3.488E-02	8.966E-02	6.905E-04	2.734E-02	1.117E+01	1.798E-13	2.642E-12	6.630E-03		1.942E-03	9.114E-03	2.257E-01	2.712E-01	2.372E-04	8.681E-02	9.714E+00	7.946E-09	2.689E-08	2.491E-04
FBgn0010194	su(Hw)	protein_coding	3R:10130176-10134311	1.120E-02	2.620E-02	8.732E-02	1.485E-01	4.758E-04	3.485E-02	3.593E+00	9.872E-04	1.436E-03	3.578E-03		Not expressed in males	-	-	-	-	-	-	-	-	-
FBgn0010213	su(s)	protein_coding	X:529922-537793	1.080E-03	8.607E-03	3.050E-01	3.563E-01	1.397E-04	3.902E-02	1.185E+01	1.957E-07	5.871E-07	3.081E-04		5.136E-03	3.695E-03	1.630E-03	8.397E-03	1.547E-03	3.123E-02	1.201E+01	7.283E-07	1.660E-06	1.831E-03
FBgn0010215	Su(var)3-7	protein_coding	3R:9090085-9095760	3.390E-03	8.482E-03	7.919E-02	1.403E-01	4.449E-04	8.624E-03	1.034E+01	8.233E-03	1.042E-02	4.376E-03		1.173E-03	2.035E-03	3.830E-02	6.974E-02	6.418E-04	3.273E-02	9.648E+00	1.072E-04	1.704E-04	3.991E-04
FBgn0010217	Su(var)205	protein_coding	2L:8209625-8211122	4.773E-04	9.992E-03	4.548E-01	4.913E-01	5.317E-05	1.558E-03	1.357E+01	2.739E-01	2.845E-01	3.410E-03		2.231E-02	2.229E-02	7.297E-03	2.217E-02	1.114E-03	5.992E-03	1.365E+01	7.964E-04	1.101E-03	4.145E-02
FBgn0010220	Su(var)2-10	protein_coding	2R:5003626-5009505	1.463E-02	1.506E-02	8.142E-03	4.500E-02	1.081E-03	1.104E-01	7.292E+00	5.576E-08	1.879E-07	1.475E-03		0.000E+00	2.300E-02	6.245E-01	6.443E-01	0.000E+00	5.378E-02	4.745E+00	1.834E-04	2.806E-04	0.000E+00
FBgn0010222	su(w[a])	protein_coding	X:906811-940073	4.567E-02	3.727E-02	3.008E-03	2.722E-02	1.364E-03	2.373E-01	9.939E+00	6.124E-11	4.326E-10	2.142E-03		5.762E-02	3.747E-02	9.602E-04	6.200E-03	1.712E-03	8.015E-01	8.984E+00	1.186E-14	1.714E-13	8.002E-04
FBgn0010223	svp	protein_coding	3R:8084458-8128507	1.939E-02	5.704E-02	8.385E-02	1.453E-01	3.784E-04	9.100E-02	5.640E+00	8.662E-05	1.514E-04	2.372E-03		Not expressed in males	-	-	-	-	-	-	-	-	-
FBgn0010225	sw	protein_coding	X:20099034-20107456	5.592E-03	1.556E-02	1.200E-01	1.816E-01	4.001E-04	4.572E-02	1.096E+01	1.040E-11	8.972E-11	1.361E-03		3.053E-02	1.667E-02	3.764E-04	3.741E-03	2.038E-03	4.560E-02	1.140E+01	3.318E-10	1.553E-09	7.453E-03
FBgn0010228	swa	protein_coding	X:6257450-6259741	2.165E-03	1.655E-02	3.107E-01	3.609E-01	1.456E-04	1.685E-02	1.152E+01	1.063E-02	1.320E-02	1.430E-03		2.380E-03	7.312E-03	1.395E-01	1.843E-01	3.623E-04	1.622E-02	1.182E+01	2.188E-05	3.860E-05	1.633E-03
FBgn0010235	sws	protein_coding	X:7850852-7862269	4.524E-03	7.368E-03	3.685E-02	9.234E-02	6.834E-04	8.692E-03	9.365E+00	3.334E-03	4.477E-03	5.793E-03		3.263E-03	3.893E-03	1.384E-02	3.370E-02	9.329E-04	6.286E-03	8.753E+00	6.812E-03	8.247E-03	5.778E-03
FBgn0010238	Syb	protein_coding	2R:6136939-6139922	5.700E-04	1.003E-02	3.764E-01	4.206E-01	6.325E-05	1.734E-02	9.881E+00	4.012E-05	7.477E-05	3.660E-04		6.582E-04	3.851E-03	2.558E-01	2.998E-01	1.903E-04	3.072E-02	9.625E+00	5.591E-05	9.245E-05	2.385E-04
FBgn0010240	T-cp1	protein_coding	3R:18314826-18317161	1.949E-02	1.534E-02	2.422E-03	2.453E-02	1.415E-03	5.347E-02	3.888E+00	3.906E-05	7.291E-05	4.058E-03		1.633E-02	1.271E-02	2.405E-03	1.072E-02	1.430E-03	3.853E-02	4.769E+00	2.997E-04	4.433E-04	4.717E-03
FBgn0010241	term	protein_coding	3L:18585402-18586871	9.990E-02	7.773E-02	2.184E-03	2.334E-02	1.431E-03	8.796E-01	7.671E+00	7.694E-18	3.960E-16	1.264E-03		8.805E-02	8.238E-02	5.418E-03	1.823E-02	1.190E-03	6.824E-01	7.858E+00	5.583E-18	2.329E-16	1.436E-03
FBgn0010246	Tbp	protein_coding	2R:17573696-17575147	2.894E-02	2.602E-02	4.575E-03	3.381E-02	1.238E-03	7.749E-02	1.069E+01	1.058E-07	3.363E-07	4.157E-03		2.454E-02	1.425E-02	5.139E-04	4.483E-03	1.916E-03	2.895E-02	1.024E+01	1.475E-05	2.674E-05	9.433E-03
FBgn0010263	thr	protein_coding	2R:13748777-13753468	2.380E-02	5.068E-02	6.951E-02	1.303E-01	5.228E-04	8.682E-02	1.048E+01	2.581E-05	4.979E-05	3.052E-03		3.147E-03	9.626E-03	1.246E-01	1.687E-01	3.639E-04	1.210E-01	1.108E+01	8.964E-09	2.987E-08	2.895E-04
FBgn0010265	tipE	protein_coding	3L:4188498-4193788	1.737E-04	4.423E-04	9.293E-02	1.545E-01	4.370E-04	6.490E-04	1.393E+01	2.694E-03	3.668E-03	2.979E-03		3.594E-04	1.746E-03	2.379E-01	2.823E-01	2.291E-04	1.357E-03	1.348E+01	3.339E-02	3.693E-02	2.948E-03
FBgn0010269	tko	protein_coding	X:2336345-2338009	7.997E-21	2.338E-02	6.787E-01	6.958E-01	3.807E-22	3.294E-02	8.893E+00	2.210E-03	3.044E-03	2.702E-21		4.167E-03	3.598E-03	3.665E-03	1.395E-02	1.289E-03	1.351E-02	6.650E+00	6.692E-02	7.185E-02	3.433E-03
FBgn0010278	tkv	protein_coding	2L:5218999-5271384	0.000E+00	1.512E-02	6.390E-01	6.604E-01	0.000E+00	2.656E-02	9.122E+00	9.423E-05	1.634E-04	0.000E+00		3.334E-03	1.765E-02	2.553E-01	2.993E-01	2.103E-04	7.116E-02	5.258E+00	5.150E-07	1.209E-06	5.215E-04
FBgn0010280	tld	protein_coding	3R:20575452-20579232	4.743E-03	1.140E-02	8.193E-02	1.433E-01	4.631E-04	0.000E+00	8.321E+00	7.123E-01	7.168E-01	Inf		4.974E-03	1.271E-02	8.903E-02	1.298E-01	4.357E-04	1.132E-02	7.154E+00	1.264E-01	1.322E-01	4.892E-03
FBgn0010282	tll	protein_coding	3R:26678036-26680122	3.391E-03	1.329E-02	1.877E-01	2.479E-01	2.840E-04	1.246E-02	9.224E+00	3.882E-02	4.472E-02	3.030E-03		2.043E-03	6.584E-03	1.494E-01	1.945E-01	3.455E-04	1.688E-02	7.290E+00	2.385E-03	3.081E-03	1.347E-03
FBgn0010287	Tm1	protein_coding	3R:11107092-11134501	1.548E-02	8.900E-02	2.525E-01	3.077E-01	1.936E-04	4.088E-01	5.311E+00	1.092E-08	4.279E-08	4.215E-04		2.680E-02	6.303E-02	8.568E-02	1.262E-01	4.733E-04	9.510E-02	4.115E+00	8.305E-04	1.144E-03	3.137E-03
FBgn0010288	Egfr	protein_coding	2R:17409924-17447482	5.830E-03	1.381E-02	8.682E-02	1.482E-01	4.700E-04	5.971E-02	1.059E+01	6.516E-13	8.203E-12	1.087E-03		2.319E-03	3.745E-03	3.279E-02	6.231E-02	6.893E-04	2.148E-02	1.091E+01	4.000E-12	3.056E-11	1.202E-03
FBgn0010292	Top2	protein_coding	2L:19447364-19453490	0.000E+00	2.045E-02	6.301E-01	6.518E-01	0.000E+00	2.138E-02	9.641E+00	4.179E-08	1.449E-07	0.000E+00		7.379E-03	2.400E-02	1.359E-01	1.807E-01	3.422E-04	1.041E-02	5.889E+00	2.255E-02	2.547E-02	7.893E-03
FBgn0010309	tor	protein_coding	2R:3592687-3596689	8.166E-03	2.494E-02	1.318E-01	1.941E-01	3.644E-04	1.652E-01	6.829E+00	9.329E-10	4.731E-09	5.501E-04		6.911E-03	2.128E-02	1.397E-01	1.845E-01	3.615E-04	2.982E-02	5.831E+00	1.131E-03	1.524E-03	2.580E-03
FBgn0010313	tra	protein_coding	3L:16583158-16584150	2.842E-03	1.525E-02	2.195E-01	2.776E-01	2.074E-04	8.760E-02	9.634E+00	1.438E-09	7.004E-09	3.611E-04		3.773E-03	2.690E-02	3.131E-01	3.547E-01	1.561E-04	4.284E-01	8.984E+00	6.442E-10	2.797E-09	9.805E-05
FBgn0010314	tra2	protein_coding	2R:10489508-10491842	1.234E-02	1.799E-02	2.553E-02	7.696E-02	7.639E-04	1.058E-01	9.838E+00	3.041E-12	3.136E-11	1.299E-03		1.653E-02	1.451E-02	4.046E-03	1.490E-02	1.268E-03	1.017E-01	4.812E+00	6.458E-05	1.057E-04	1.809E-03
FBgn0010315	trc	protein_coding	3L:19823963-19827404	1.665E-02	2.171E-02	1.661E-02	6.336E-02	8.534E-04	9.675E-02	8.332E+00	3.011E-08	1.075E-07	1.915E-03		3.510E-02	1.674E-02	1.560E-04	2.296E-03	2.334E-03	0.000E+00	3.799E+00	7.695E-01	7.704E-01	Inf
FBgn0010316	Gr5a	protein_coding	X:5574649-5576521	6.240E-03	9.887E-03	3.239E-02	8.737E-02	7.025E-04	3.752E-02	1.009E+01	4.076E-07	1.135E-06	1.851E-03		7.031E-02	2.806E-02	4.849E-05	1.293E-03	2.790E-03	5.648E-02	6.999E+00	1.891E-03	2.470E-03	1.386E-02
FBgn0010317	Treh	protein_coding	2R:16961522-16976450	9.436E-03	1.526E-02	3.422E-02	8.905E-02	6.884E-04	7.676E-02	8.982E+00	1.095E-08	4.288E-08	1.368E-03		Not expressed in males	-	-	-	-	-	-	-	-	-
FBgn0010328	trk	protein_coding	2L:10271442-10272324	2.619E-03	1.782E-02	2.977E-01	3.501E-01	1.636E-04	2.424E-02	1.039E+01	1.051E-03	1.521E-03	1.203E-03		1.273E-02	2.130E-02	4.104E-02	7.329E-02	6.650E-04	5.955E-03	8.436E+00	1.930E-01	1.987E-01	2.379E-02
FBgn0010333	trp	protein_coding	3R:25740242-25746011	2.327E-03	5.710E-03	7.147E-02	1.323E-01	4.535E-04	9.616E-03	9.661E+00	4.670E-02	5.325E-02	2.693E-03		3.842E-03	1.585E-02	1.577E-01	2.028E-01	2.698E-04	1.230E-02	8.862E+00	4.501E-02	4.914E-02	3.477E-03
FBgn0010339	trx	protein_coding	3R:10089079-10112625	2.179E-03	5.061E-03	8.696E-02	1.483E-01	4.792E-04	1.177E-02	1.038E+01	1.654E-07	5.040E-07	2.061E-03		2.991E-03	7.709E-03	9.488E-02	1.362E-01	4.319E-04	2.547E-03	8.694E+00	1.931E-02	2.199E-02	1.307E-02
FBgn0010340	alphaTry	protein_coding	2R:7231764-7232624	3.539E-03	2.528E-02	3.019E-01	3.538E-01	1.558E-04	9.892E-03	6.869E+00	5.559E-02	6.265E-02	3.982E-03		3.554E-03	2.675E-02	3.244E-01	3.657E-01	1.479E-04	2.846E-02	5.343E+00	2.773E-02	3.094E-02	1.390E-03
FBgn0010341	tsg	protein_coding	X:11882094-11882981	9.945E-03	4.803E-03	1.929E-04	6.080E-03	2.305E-03	3.074E-02	1.104E+01	7.488E-03	9.536E-03	3.602E-03		5.371E-03	1.182E-02	7.812E-02	1.177E-01	5.056E-04	3.065E-02	1.029E+01	1.846E-02	2.108E-02	1.951E-03
FBgn0010342	tsh	protein_coding	2L:21828592-21837011	2.149E-02	2.707E-02	1.678E-02	6.363E-02	8.837E-04	1.685E-01	9.315E+00	7.986E-12	7.142E-11	1.420E-03		Not expressed in males	-	-	-	-	-	-	-	-	-
FBgn0010348	tsl	protein_coding	3R:17603835-17608258	3.044E-03	7.435E-03	7.946E-02	1.406E-01	4.557E-04	4.955E-03	1.105E+01	2.442E-02	2.882E-02	6.837E-03		5.128E-03	3.369E-03	1.010E-03	6.407E-03	1.694E-03	8.378E-03	1.073E+01	2.506E-04	3.755E-04	6.813E-03
FBgn0010350	ttk	protein_coding	3R:27539588-27561114	1.651E-03	4.555E-03	1.146E-01	1.768E-01	4.035E-04	6.634E-03	1.016E+01	3.164E-02	3.685E-02	2.770E-03		6.651E-04	4.130E-03	2.735E-01	3.168E-01	1.793E-04	1.161E-02	1.031E+01	8.750E-03	1.041E-02	6.375E-04
FBgn0010352	tub	protein_coding	3R:213463-215535	1.569E-02	1.600E-02	7.868E-03	4.429E-02	1.091E-03	1.515E-02	1.188E+01	1.651E-03	2.318E-03	1.152E-02		3.574E-03	5.716E-03	3.324E-02	6.295E-02	6.959E-04	9.472E-03	1.219E+01	1.486E-02	1.717E-02	4.200E-03
FBgn0010355	alphaTub84B	protein_coding	3R:2912320-2914561	6.592E-03	1.030E-02	2.413E-02	7.522E-02	7.122E-04	2.927E-02	7.553E+00	6.314E-03	8.135E-03	2.507E-03		2.853E-18	2.770E-02	8.223E-01	8.298E-01	1.147E-19	3.527E-02	6.517E+00	6.160E-04	8.687E-04	9.005E-19
FBgn0010356	alphaTub84D	protein_coding	3R:3356474-3358454	4.177E-03	4.494E-02	2.764E-01	3.297E-01	1.035E-04	1.214E-01	6.656E+00	4.361E-09	1.883E-08	3.831E-04		Not expressed in males	-	-	-	-	-	-	-	-	-
FBgn0010357	alphaTub85E	protein_coding	3R:5556942-5558972	8.785E-03	4.107E-03	1.403E-04	5.006E-03	2.381E-03	6.065E-03	1.424E+01	7.581E-06	1.622E-05	1.612E-02		3.802E-03	4.915E-03	1.889E-02	4.223E-02	8.611E-04	1.160E-02	1.426E+01	5.730E-10	2.532E-09	3.647E-03
FBgn0010379	betaTub56D	protein_coding	2R:15334823-15339105	1.520E-02	2.963E-02	5.931E-02	1.188E-01	5.712E-04	4.268E-02	8.845E+00	1.435E-02	1.749E-02	3.965E-03		0.000E+00	4.590E-02	6.796E-01	6.954E-01	0.000E+00	2.400E-02	8.588E+00	8.103E-02	8.627E-02	0.000E+00
FBgn0010380	betaTub60D	protein_coding	2R:20193403-20200622	3.026E-03	2.228E-03	1.760E-03	2.119E-02	1.512E-03	1.236E-03	1.057E+01	3.411E-01	3.518E-01	2.726E-02		2.917E-03	1.098E-03	3.206E-05	1.110E-03	2.958E-03	1.261E-02	9.793E+00	2.190E-03	2.842E-03	2.575E-03
FBgn0010381	betaTub85D	protein_coding	3R:5234104-5236004	3.821E-03	2.812E-03	1.826E-03	2.153E-02	1.512E-03	2.363E-02	1.317E+01	2.894E-05	5.529E-05	1.800E-03		1.432E-01	4.710E-02	1.251E-05	6.617E-04	3.384E-03	8.414E-01	1.080E+01	1.609E-05	2.903E-05	1.894E-03
FBgn0010382	betaTub97EF	protein_coding	3R:23792729-23814106	5.275E-02	6.705E-02	1.666E-02	6.347E-02	8.757E-04	7.789E-02	9.092E+00	2.074E-02	2.477E-02	7.539E-03		Not expressed in males	-	-	-	-	-	-	-	-	-
FBgn0010383	tud	protein_coding	2R:17070826-17080418	8.555E-02	6.631E-02	2.312E-03	2.396E-02	1.436E-03	1.957E-01	8.056E+00	3.129E-07	8.978E-07	4.867E-03		2.691E-01	4.390E-02	4.208E-08	3.112E-05	6.823E-03	2.178E-01	5.312E+00	1.995E-07	5.054E-07	1.375E-02
FBgn0010385	ptc	protein_coding	2R:4537153-4552728	1.269E-01	1.268E-01	7.013E-03	4.237E-02	1.114E-03	1.250E+00	9.195E+00	1.756E-14	3.492E-13	1.130E-03		Not expressed in males	-	-	-	-	-	-	-	-	-
FBgn0010387	tup	protein_coding	2L:18859506-18881261	2.341E-02	1.621E-02	1.337E-03	1.859E-02	1.607E-03	2.652E-02	1.255E+01	8.421E-07	2.173E-06	9.826E-03		6.958E-03	5.340E-03	2.159E-03	1.000E-02	1.450E-03	1.653E-02	1.339E+01	1.192E-07	3.163E-07	4.685E-03
FBgn0010389	twi	protein_coding	2R:18872896-18935848	4.271E-02	1.552E-01	1.726E-01	2.332E-01	3.062E-04	8.508E-02	3.279E+00	3.711E-02	4.292E-02	5.588E-03		0.000E+00	1.727E-01	5.480E-01	5.738E-01	0.000E+00	1.896E-01	3.392E+00	2.186E-04	3.309E-04	0.000E+00
FBgn0010391	snRNA:U1:21D	snRNA	2L:901490-901654	8.313E-04	5.703E-03	2.971E-01	3.495E-01	1.622E-04	2.990E-03	1.051E+01	7.513E-02	8.327E-02	3.095E-03		5.873E-03	5.256E-03	4.550E-03	1.621E-02	1.244E-03	1.222E-02	1.008E+01	1.571E-03	2.075E-03	5.349E-03
FBgn0010395	snRNA:U2:14B	snRNA	X:16148704-16148896	6.163E-02	5.391E-02	4.082E-03	3.216E-02	1.273E-03	1.502E-01	5.511E+00	1.275E-06	3.194E-06	4.567E-03		3.884E-02	4.851E-02	1.664E-02	3.849E-02	8.912E-04	1.841E-01	5.686E+00	3.440E-08	1.025E-07	2.349E-03
FBgn0010397	snRNA:U2:38ABa	snRNA	2L:19815613-19815805	4.639E-03	2.614E-02	2.488E-01	3.043E-01	1.975E-04	7.767E-02	9.044E+00	3.562E-07	1.006E-06	6.648E-04		1.644E-02	4.053E-02	8.764E-02	1.283E-01	4.516E-04	6.072E-02	8.454E+00	1.315E-06	2.843E-06	3.015E-03
FBgn0010398	snRNA:U2:38ABb	snRNA	2L:19812645-19812836	8.458E-02	8.597E-02	7.677E-03	4.382E-02	1.095E-03	2.205E-01	6.424E+00	2.328E-08	8.495E-08	4.270E-03		1.137E-15	1.137E-01	4.414E-01	4.744E-01	1.113E-17	5.430E-02	3.984E+00	3.916E-02	4.298E-02	2.331E-16
FBgn0010401	snRNA:U3:22A	snRNA	2L:1432710-1432921	5.405E-02	5.785E-02	9.398E-03	4.825E-02	1.040E-03	1.959E-01	8.351E+00	2.197E-08	8.069E-08	3.072E-03		7.152E-02	4.388E-02	6.983E-04	5.198E-03	1.814E-03	1.219E-01	9.604E+00	3.524E-07	8.473E-07	6.532E-03
FBgn0010403	snRNA:U4:39B	snRNA	2L:21215035-21215178	3.726E-02	6.937E-02	5.327E-02	1.122E-01	5.978E-04	1.696E-01	9.219E+00	2.318E-10	1.375E-09	2.445E-03		5.838E-02	2.298E-02	4.397E-05	1.257E-03	2.827E-03	1.015E-01	1.029E+01	5.212E-08	1.487E-07	6.399E-03
FBgn0010406	snRNA:U4:38AB	snRNA	2L:19810733-19810875	5.803E-04	4.706E-03	3.127E-01	3.626E-01	1.373E-04	3.923E-03	1.019E+01	1.027E-01	1.122E-01	1.647E-03		0.000E+00	7.433E-03	8.882E-01	8.924E-01	0.000E+00	1.952E-02	9.549E+00	3.955E-03	4.957E-03	0.000E+00
FBgn0010408	snRNA:U5:14B	snRNA	X:16148040-16148150	4.710E-04	8.948E-04	3.835E-02	9.448E-02	5.859E-04	6.067E-04	1.377E+01	1.993E-01	2.098E-01	8.641E-03		2.377E-04	1.849E-03	3.101E-01	3.518E-01	1.430E-04	4.704E-03	1.325E+01	7.267E-06	1.390E-05	5.624E-04
FBgn0010409	snRNA:U5:23D	snRNA	2L:3048700-3048831	4.699E-04	2.620E-04	4.138E-04	9.155E-03	1.996E-03	0.000E+00	1.401E+01	6.990E-01	7.038E-01	Inf		9.253E-04	5.516E-04	5.986E-04	4.807E-03	1.867E-03	1.086E-03	1.371E+01	7.923E-04	1.096E-03	9.484E-03
FBgn0010411	snRNA:U5:34A	snRNA	2L:13244847-13244974	3.756E-04	9.163E-04	8.753E-02	1.488E-01	4.563E-04	1.436E-03	1.375E+01	2.577E-02	3.033E-02	2.911E-03		2.581E-03	1.651E-03	8.784E-04	5.856E-03	1.740E-03	1.764E-03	1.328E+01	2.538E-02	2.846E-02	1.629E-02
FBgn0010412	snRNA:U5:35D	snRNA	2L:15751556-15751682	3.951E-04	5.825E-04	2.599E-02	7.754E-02	7.550E-04	9.155E-04	1.386E+01	1.581E-02	1.913E-02	4.803E-03		1.117E-03	2.073E-03	5.054E-02	8.549E-02	5.997E-04	1.014E-03	1.343E+01	1.234E-02	1.440E-02	1.225E-02
FBgn0010416	snRNA:U5:63BC	snRNA	3L:3090800-3090923	4.473E-03	3.049E-02	1.908E-01	2.508E-01	1.633E-04	3.222E-02	7.509E+00	2.115E-03	2.921E-03	1.545E-03		0.000E+00	2.774E-02	7.395E-01	7.520E-01	0.000E+00	6.233E-04	5.010E+00	4.291E-01	4.323E-01	0.000E+00
FBgn0010417	RpL40	protein_coding	2L:4227698-4228561	1.483E-02	1.605E-02	1.001E-02	4.976E-02	1.029E-03	2.107E-02	7.935E+00	1.313E-02	1.608E-02	7.837E-03		1.631E-03	8.765E-03	2.590E-01	3.028E-01	2.072E-04	4.554E-02	5.746E+00	3.399E-06	6.893E-06	3.988E-04
FBgn0010421	RpS27A	protein_coding	2L:10408351-10410456	1.176E-02	1.923E-02	2.995E-02	8.316E-02	6.810E-04	6.693E-02	1.056E+01	3.074E-08	1.094E-07	1.956E-03		8.711E-04	5.082E-03	2.758E-01	3.189E-01	1.908E-04	1.295E-02	9.208E+00	1.032E-03	1.400E-03	7.485E-04
FBgn0010422	Ubi-p63E	protein_coding	3L:3899258-3903184	5.810E-03	4.417E-03	2.065E-03	2.281E-02	1.464E-03	1.519E-02	9.940E+00	8.303E-03	1.051E-02	4.259E-03		7.465E-04	5.162E-03	3.090E-01	3.506E-01	1.610E-04	1.207E-02	8.913E+00	6.208E-02	6.682E-02	6.886E-04
FBgn0010423	Ubx	protein_coding	3R:12482344-12560148	8.348E-02	9.353E-02	1.026E-02	5.040E-02	9.935E-04	2.859E-01	8.549E+00	7.082E-12	6.425E-11	3.250E-03		1.157E-02	1.463E-02	1.711E-02	3.925E-02	8.803E-04	9.132E-02	8.734E+00	3.346E-08	9.989E-08	1.411E-03
FBgn0010424	unc	protein_coding	X:20982440-20987941	2.944E-01	3.351E-01	1.150E-02	5.323E-02	9.780E-04	1.483E-01	9.223E+00	8.858E-11	5.999E-10	2.211E-02		1.572E-02	6.738E-02	2.110E-01	2.569E-01	2.597E-04	3.025E-01	8.707E+00	1.498E-11	9.640E-11	5.784E-04
FBgn0010425	Uro	protein_coding	2L:7780084-7781415	3.008E-02	2.122E-02	1.448E-03	1.929E-02	1.578E-03	1.025E-01	1.303E+01	1.009E-15	2.756E-14	3.268E-03		2.560E-02	4.307E-02	4.163E-02	7.412E-02	6.615E-04	1.027E-01	1.261E+01	2.774E-16	6.600E-15	2.774E-03
FBgn0010431	ush	protein_coding	2L:476219-540560	1.618E-02	2.705E-02	3.925E-02	9.505E-02	6.656E-04	5.515E-02	1.164E+01	1.654E-12	1.868E-11	3.265E-03		Not expressed in males	-	-	-	-	-	-	-	-	-
FBgn0010434	usp	protein_coding	X:1932830-1936344	1.635E-02	4.189E-02	8.645E-02	1.478E-01	4.344E-04	1.288E-01	9.117E+00	6.411E-07	1.697E-06	1.413E-03		5.547E-03	7.028E-03	1.758E-02	4.010E-02	8.785E-04	3.777E-02	9.121E+00	6.602E-03	8.009E-03	1.635E-03
FBgn0010435	v	protein_coding	X:10818004-10819664	7.814E-03	3.184E-02	1.747E-01	2.351E-01	2.732E-04	3.068E-02	1.133E+01	1.008E-07	3.215E-07	2.835E-03		7.077E-03	5.027E-03	1.517E-03	8.046E-03	1.567E-03	6.384E-03	1.237E+01	7.410E-03	8.909E-03	1.234E-02
FBgn0010438	vap	protein_coding	X:15893983-15899845	2.369E-03	8.730E-03	1.755E-01	2.359E-01	3.021E-04	2.778E-02	1.093E+01	4.908E-08	1.682E-07	9.493E-04		3.721E-03	2.315E-02	2.886E-01	3.311E-01	1.789E-04	3.754E-02	6.753E+00	1.325E-03	1.770E-03	1.104E-03
FBgn0010441	vg	protein_coding	2R:8772136-8786890	7.738E-03	9.210E-02	3.853E-01	4.284E-01	9.352E-05	1.449E-01	7.160E+00	1.631E-05	3.263E-05	5.946E-04		Not expressed in males	-	-	-	-	-	-	-	-	-
FBgn0010452	vir	protein_coding	2R:19247714-19253878	4.880E-02	1.154E-01	8.732E-02	1.485E-01	4.705E-04	2.039E-01	5.059E+00	5.379E-04	8.182E-04	2.664E-03		7.371E-02	5.962E-02	2.832E-03	1.182E-02	1.376E-03	1.709E-01	4.762E+00	1.740E-09	6.759E-09	4.802E-03
FBgn0010470	vls	protein_coding	2L:20064260-20065679	3.088E-04	9.266E-03	4.577E-01	4.941E-01	3.710E-05	8.223E-02	1.036E+01	1.699E-12	1.907E-11	4.180E-05		1.091E-02	8.498E-03	2.376E-03	1.063E-02	1.430E-03	8.201E-02	1.028E+01	1.505E-15	2.776E-14	1.481E-03
FBgn0010488	Vm26Aa	protein_coding	2L:5959595-5960340	7.994E-03	7.375E-03	4.919E-03	3.521E-02	1.207E-03	1.471E-03	1.089E+01	3.584E-01	3.689E-01	6.050E-02		2.072E-03	6.140E-03	1.326E-01	1.773E-01	3.757E-04	5.036E-03	1.055E+01	5.647E-02	6.099E-02	4.581E-03
FBgn0010497	Vm26Ab	protein_coding	2L:5957003-5957639	3.142E-03	6.631E-03	7.055E-02	1.314E-01	5.274E-04	6.615E-02	1.197E+01	1.006E-08	3.989E-08	5.287E-04		3.324E-02	1.814E-02	3.621E-04	3.656E-03	2.040E-03	1.306E-01	1.060E+01	3.920E-13	3.787E-12	2.833E-03
FBgn0010501	Vm34Ca	protein_coding	2L:13411140-13411631	1.857E-02	2.545E-02	2.277E-02	7.298E-02	8.124E-04	2.863E-02	8.837E+00	1.059E-04	1.820E-04	7.220E-03		Not expressed in males	-	-	-	-	-	-	-	-	-
FBgn0010504	vn	protein_coding	3L:5806437-5838764	1.584E-02	1.204E-02	2.135E-03	2.314E-02	1.464E-03	2.565E-02	7.352E+00	1.727E-06	4.206E-06	6.872E-03		4.732E-03	5.297E-03	1.091E-02	2.881E-02	9.945E-04	2.611E-02	9.963E+00	5.032E-07	1.183E-06	2.018E-03
FBgn0010516	w	protein_coding	X:2684631-2690499	1.146E-03	5.679E-03	1.978E-01	2.572E-01	2.247E-04	9.719E-03	1.175E+01	2.313E-08	8.448E-08	1.313E-03		8.424E-03	6.941E-03	2.891E-03	1.200E-02	1.351E-03	1.787E-02	1.171E+01	3.404E-11	2.010E-10	5.248E-03
FBgn0010520	W	protein_coding	3L:18160844-18178741	5.922E-03	7.534E-03	1.794E-02	6.583E-02	8.750E-04	4.896E-02	9.538E+00	4.976E-08	1.703E-07	1.346E-03		1.896E-02	4.542E-02	7.934E-02	1.192E-01	4.646E-04	1.502E-01	6.593E+00	3.448E-07	8.296E-07	1.405E-03
FBgn0010548	wbl	protein_coding	2R:15136899-15138422	1.168E-03	1.776E-02	3.092E-01	3.596E-01	7.316E-05	4.408E-02	9.263E+00	1.714E-08	6.421E-08	2.949E-04		3.587E-03	4.827E-03	2.159E-02	4.668E-02	8.272E-04	4.000E-02	1.018E+01	2.847E-07	6.980E-07	9.983E-04
FBgn0010551	wg	protein_coding	2L:7307158-7316265	2.490E-03	3.720E-03	2.888E-02	8.152E-02	7.452E-04	1.024E-02	1.170E+01	1.585E-02	1.917E-02	2.706E-03		6.628E-06	3.974E-03	5.343E-01	5.610E-01	1.857E-06	1.387E-02	1.119E+01	5.883E-04	8.324E-04	5.320E-06
FBgn0010590	wupA	protein_coding	X:17999600-18010955	0.000E+00	1.103E-02	6.177E-01	6.404E-01	0.000E+00	1.290E-02	1.176E+01	1.263E-04	2.148E-04	0.000E+00		0.000E+00	3.328E-03	8.107E-01	8.188E-01	0.000E+00	1.001E-02	1.189E+01	2.530E-04	3.786E-04	0.000E+00
FBgn0010591	y	protein_coding	X:250541-255278	1.144E-03	3.611E-03	1.139E-01	1.762E-01	3.525E-04	1.177E-02	1.057E+01	1.256E-08	4.860E-08	1.082E-03		1.687E-02	8.272E-03	1.992E-04	2.605E-03	2.270E-03	4.330E-02	9.949E+00	6.083E-12	4.391E-11	4.337E-03
FBgn0010602	Yp1	protein_coding	X:9947843-9949531	3.384E-20	8.360E-03	6.872E-01	7.036E-01	4.506E-21	4.384E-03	1.175E+01	3.235E-02	3.763E-02	8.592E-20		9.299E-03	8.656E-03	5.393E-03	1.821E-02	1.196E-03	2.024E-02	1.072E+01	4.286E-05	7.219E-05	5.113E-03
FBgn0010607	Yp3	protein_coding	X:13653578-13655580	2.743E-02	2.716E-02	6.120E-03	3.985E-02	1.124E-03	8.647E-02	8.203E+00	1.652E-09	7.936E-09	3.532E-03		2.615E-03	1.485E-02	2.502E-01	2.941E-01	1.960E-04	4.453E-02	5.236E+00	2.298E-03	2.973E-03	6.537E-04
FBgn0010611	yrt	protein_coding	3R:9254588-9260706	3.186E-03	1.835E-03	4.915E-04	1.016E-02	1.932E-03	8.863E-03	1.045E+01	4.138E-06	9.374E-06	4.001E-03		9.659E-03	7.471E-03	2.216E-03	1.019E-02	1.439E-03	4.166E-02	1.000E+01	1.711E-09	6.661E-09	2.581E-03
FBgn0010612	z	protein_coding	X:2341801-2344583	3.518E-05	1.915E-02	4.291E-01	4.680E-01	2.045E-06	8.676E-03	1.300E+01	1.755E-04	2.899E-04	4.514E-05		3.866E-03	1.931E-03	2.105E-04	2.675E-03	2.228E-03	6.545E-03	1.332E+01	2.887E-04	4.277E-04	6.574E-03
FBgn0010620	Z600	protein_coding	3L:15502160-15502613	2.539E-03	2.579E-03	7.237E-03	4.294E-02	1.096E-03	5.962E-03	1.045E+01	4.426E-04	6.826E-04	4.741E-03		1.925E-03	1.467E-03	2.103E-03	9.841E-03	1.461E-03	4.636E-02	1.015E+01	2.694E-10	1.292E-09	4.622E-04
FBgn0010621	zen	protein_coding	3R:2578585-2579916	3.180E-03	7.003E-03	7.381E-02	1.349E-01	5.054E-04	1.742E-02	1.169E+01	1.383E-10	8.766E-10	2.031E-03		2.525E-03	3.372E-03	1.925E-02	4.282E-02	8.336E-04	2.473E-02	9.489E+00	1.290E-07	3.405E-07	1.137E-03
FBgn0010622	zen2	protein_coding	3R:2568856-2569858	3.096E-03	4.579E-03	2.293E-02	7.328E-02	7.527E-04	1.818E-03	9.445E+00	3.825E-01	3.926E-01	1.895E-02		1.403E-02	1.238E-02	4.276E-03	1.552E-02	1.262E-03	1.775E-02	8.776E+00	5.879E-04	8.320E-04	8.796E-03
FBgn0010638	uzip	protein_coding	2R:20899584-20919260	2.299E-03	4.915E-03	6.760E-02	1.280E-01	5.207E-04	9.405E-03	1.181E+01	5.053E-06	1.122E-05	2.721E-03		1.739E-03	3.757E-03	7.504E-02	1.143E-01	5.151E-04	9.517E-03	1.149E+01	3.767E-08	1.110E-07	2.034E-03
FBgn0010651	Zw	protein_coding	X:19561284-19566386	9.502E-03	6.605E-02	2.824E-01	3.360E-01	1.601E-04	1.112E-01	9.421E+00	8.102E-15	1.736E-13	9.515E-04		1.945E-01	8.139E-02	6.676E-05	1.556E-03	2.660E-03	1.520E-01	9.812E+00	7.538E-12	5.278E-11	1.424E-02
FBgn0010660	Prosalpha4	protein_coding	X:16170302-16171620	2.067E-02	3.648E-02	4.704E-02	1.050E-01	6.308E-04	2.059E-02	6.988E+00	1.374E-01	1.474E-01	1.118E-02		5.503E-03	7.855E-03	2.593E-02	5.286E-02	7.797E-04	8.982E-03	4.602E+00	7.517E-02	8.026E-02	6.819E-03
FBgn0010741	Dhfr	protein_coding	3R:12306888-12307600	2.268E-03	4.290E-03	5.582E-02	1.146E-01	5.884E-04	1.207E-02	1.086E+01	3.447E-05	6.488E-05	2.091E-03		2.858E-03	5.736E-03	6.116E-02	9.790E-02	5.546E-04	1.009E-02	9.458E+00	9.317E-03	1.105E-02	3.152E-03
FBgn0010747	bs	protein_coding	2R:20230383-20263996	2.964E-03	1.371E-03	1.320E-04	4.882E-03	2.406E-03	4.232E-21	9.804E+00	6.890E-01	6.943E-01	7.794E+15		1.564E-03	6.353E-03	1.984E-01	2.443E-01	2.741E-04	7.913E-03	9.927E+00	1.593E-02	1.834E-02	2.200E-03
FBgn0010750	oc	protein_coding	X:8524191-8544714	0.000E+00	4.993E-02	9.105E-01	9.134E-01	0.000E+00	1.154E-02	7.221E+00	9.434E-02	1.034E-01	0.000E+00		2.307E-03	8.212E-03	1.709E-01	2.161E-01	3.127E-04	2.207E-02	4.886E+00	5.033E-03	6.204E-03	1.163E-03
FBgn0010762	Pp1-87B	protein_coding	3R:8249342-8251639	9.577E-03	6.750E-02	3.076E-01	3.581E-01	1.579E-04	9.058E-02	5.178E+00	6.987E-03	8.934E-03	1.177E-03		9.605E-03	2.491E-02	9.764E-02	1.392E-01	4.292E-04	2.002E-01	3.684E+00	6.424E-05	1.052E-04	5.339E-04
FBgn0010768	cdc2	protein_coding	2L:10384738-10386262	2.427E-02	4.574E-02	4.673E-02	1.048E-01	5.906E-04	2.284E-01	6.162E+00	3.795E-06	8.667E-06	1.183E-03		Not expressed in males	-	-	-	-	-	-	-	-	-
FBgn0010770	cdc2c	protein_coding	3R:16561344-16564136	6.072E-03	5.246E-03	3.884E-03	3.138E-02	1.288E-03	2.187E-02	9.612E+00	1.428E-03	2.027E-03	3.090E-03		6.708E-04	3.531E-02	4.721E-01	5.034E-01	2.114E-05	3.894E-02	5.252E+00	1.073E-02	1.263E-02	1.917E-04
FBgn0010772	Nrt	protein_coding	3L:16759171-16770565	5.210E-03	6.894E-03	1.922E-02	6.778E-02	8.413E-04	8.750E-03	8.963E+00	5.070E-02	5.744E-02	6.628E-03		1.386E-03	7.962E-03	2.635E-01	3.071E-01	1.937E-04	1.080E-02	8.813E+00	5.685E-04	8.056E-04	1.428E-03
FBgn0010774	tin	protein_coding	3R:17204698-17207692	1.227E-02	2.095E-02	4.174E-02	9.841E-02	6.521E-04	4.115E-02	1.038E+01	1.328E-05	2.698E-05	3.320E-03		8.301E-03	9.635E-03	1.276E-02	3.189E-02	9.591E-04	2.173E-02	8.387E+00	8.176E-07	1.843E-06	4.252E-03
FBgn0010786	Tm2	protein_coding	3R:11135914-11140919	3.307E-03	1.157E-02	1.523E-01	2.142E-01	3.183E-04	1.637E-02	1.013E+01	5.546E-05	1.004E-04	2.249E-03		3.947E-04	1.443E-02	3.887E-01	4.253E-01	3.045E-05	1.176E-01	9.308E+00	4.648E-14	5.827E-13	3.736E-05
FBgn0010803	nAChRbeta2	protein_coding	3R:20334949-20340828	2.308E-03	6.332E-03	1.161E-01	1.785E-01	4.057E-04	6.560E-03	8.482E+00	6.125E-04	9.225E-04	3.916E-03		7.091E-03	8.681E-03	1.563E-02	3.666E-02	9.092E-04	1.378E-02	7.877E+00	1.028E-02	1.213E-02	5.727E-03
FBgn0010808	boca	protein_coding	2R:3453377-3454243	7.121E-03	1.388E-02	4.055E-02	9.700E-02	5.709E-04	2.904E-02	1.059E+01	1.157E-06	2.916E-06	2.730E-03		2.607E-02	1.111E-02	7.475E-05	1.625E-03	2.613E-03	1.882E-02	1.073E+01	4.104E-08	1.202E-07	1.542E-02
FBgn0010812	blow	protein_coding	2R:3467992-3474584	9.705E-03	2.183E-02	7.913E-02	1.403E-01	4.949E-04	6.259E-02	4.965E+00	6.535E-03	8.394E-03	1.726E-03		Not expressed in males	-	-	-	-	-	-	-	-	-
FBgn0010825	nullo	protein_coding	X:6943508-6944354	1.425E-02	2.446E-02	4.385E-02	1.011E-01	6.485E-04	5.403E-02	8.287E+00	2.520E-03	3.445E-03	2.936E-03		1.340E-02	1.874E-02	2.435E-02	5.071E-02	7.958E-04	5.923E-02	8.272E+00	1.332E-02	1.548E-02	2.518E-03
FBgn0010830	kst	protein_coding	3L:3336859-3368133	0.000E+00	2.150E-02	5.400E-01	5.692E-01	0.000E+00	6.895E-02	8.606E+00	3.281E-04	5.161E-04	0.000E+00		1.016E-02	1.104E-02	9.506E-03	2.632E-02	1.024E-03	3.307E-02	6.294E+00	1.448E-03	1.926E-03	3.419E-03
FBgn0010877	5-HT1A	protein_coding	2R:14954659-15009463	3.045E-03	1.585E-02	2.456E-01	3.012E-01	2.139E-04	1.991E-02	9.503E+00	1.348E-03	1.924E-03	1.703E-03		1.796E-02	1.353E-02	2.035E-03	9.619E-03	1.477E-03	3.198E-02	8.257E+00	1.275E-03	1.709E-03	6.251E-03
FBgn0010894	up	protein_coding	X:13487506-13496611	8.431E-03	1.509E-02	4.668E-02	1.048E-01	6.220E-04	1.769E-02	9.150E+00	2.126E-04	3.446E-04	5.305E-03		4.079E-02	6.121E-02	3.022E-02	5.879E-02	7.419E-04	4.162E-02	8.517E+00	3.001E-07	7.316E-07	1.091E-02
FBgn0010905	sc	protein_coding	X:290092-291530	3.189E-02	9.406E-02	1.084E-01	1.705E-01	3.774E-04	1.683E-01	6.677E+00	3.341E-05	6.303E-05	2.109E-03		0.000E+00	5.983E-02	6.747E-01	6.907E-01	0.000E+00	3.945E-02	4.158E+00	3.053E-01	3.101E-01	0.000E+00
FBgn0010909	Mst98Cb	protein_coding	3R:24118519-24119585	2.825E-03	8.998E-03	1.153E-01	1.776E-01	3.495E-04	5.836E-03	9.094E+00	9.386E-02	1.029E-01	5.389E-03		2.297E-03	3.312E-02	3.046E-01	3.463E-01	7.720E-05	5.216E-02	7.585E+00	1.023E-03	1.389E-03	4.901E-04
FBgn0010926	Mst84Da	protein_coding	3R:3191571-3191984	1.921E-03	9.094E-03	1.899E-01	2.501E-01	2.351E-04	3.104E-02	8.493E+00	2.071E-07	6.163E-07	6.887E-04		Not expressed in males	-	-	-	-	-	-	-	-	-
FBgn0011016	Mst84Db	protein_coding	3R:3190881-3191349	9.596E-04	3.334E-03	1.511E-01	2.130E-01	3.203E-04	1.679E-02	1.032E+01	2.490E-01	2.595E-01	6.363E-04		2.143E-03	3.347E-03	2.998E-02	5.846E-02	7.125E-04	6.159E-02	9.895E+00	3.063E-03	3.895E-03	3.873E-04
FBgn0011020	Mst84Dc	protein_coding	3R:3189975-3190395	7.410E-02	8.057E-02	9.373E-03	4.822E-02	1.024E-03	1.466E-01	6.235E+00	4.239E-10	2.336E-09	5.628E-03		Not expressed in males	-	-	-	-	-	-	-	-	-
FBgn0011204	Mst84Dd	protein_coding	3R:3189028-3189495	1.186E-02	4.580E-02	1.600E-01	2.216E-01	2.881E-04	2.388E-02	1.052E+01	3.521E-05	6.618E-05	5.527E-03		8.116E-03	2.900E-02	1.717E-01	2.168E-01	3.116E-04	4.276E-02	9.427E+00	1.000E-03	1.361E-03	2.113E-03
FBgn0011205	mts	protein_coding	2L:7827649-7833576	9.293E-03	6.921E-03	1.916E-03	2.200E-02	1.495E-03	3.714E-02	9.839E+00	6.955E-09	2.865E-08	2.786E-03		6.878E-03	2.410E-02	1.631E-01	2.082E-01	3.176E-04	1.013E-01	1.017E+01	6.174E-13	5.721E-12	7.557E-04
FBgn0011207	Csp	protein_coding	3L:22260481-22266845	5.035E-03	5.359E-03	8.011E-03	4.479E-02	1.046E-03	1.644E-02	9.572E+00	1.440E-03	2.043E-03	3.409E-03		5.398E-03	5.813E-03	7.835E-03	2.325E-02	1.034E-03	2.515E-02	8.488E+00	3.857E-04	5.614E-04	2.389E-03
FBgn0011211	Peb	protein_coding	2R:21062648-21064238	1.388E-03	4.959E-03	1.406E-01	2.030E-01	3.116E-04	8.888E-03	1.332E+01	1.886E-03	2.627E-03	1.738E-03		3.490E-03	3.345E-03	6.086E-03	1.966E-02	1.161E-03	1.319E-02	1.347E+01	1.037E-07	2.787E-07	2.945E-03
FBgn0011217	snRNA:U1:82Eb	snRNA	3R:773654-773818	2.559E-03	4.945E-03	5.738E-02	1.166E-01	5.760E-04	4.462E-03	1.220E+01	3.637E-03	4.853E-03	6.384E-03		4.421E-04	1.680E-03	1.810E-01	2.267E-01	2.930E-04	1.393E-03	1.205E+01	1.810E-01	1.867E-01	3.534E-03
FBgn0011224	snRNA:U1:95Ca	snRNA	3R:19685188-19685352	4.361E-02	6.202E-02	2.291E-02	7.325E-02	7.827E-04	7.510E-02	7.982E+00	1.409E-02	1.719E-02	6.464E-03		1.348E-02	2.784E-02	5.908E-02	9.545E-02	5.389E-04	6.196E-02	8.320E+00	4.945E-02	5.378E-02	2.421E-03
FBgn0011227	snRNA:U1:95Cb	snRNA	3R:19653591-19653755	8.594E-03	1.053E-02	1.519E-02	6.074E-02	9.081E-04	4.127E-02	1.241E+01	4.685E-05	8.633E-05	2.318E-03		6.296E-03	7.098E-03	1.152E-02	2.979E-02	9.873E-04	3.957E-03	1.275E+01	1.108E-01	1.164E-01	1.771E-02
FBgn0011230	snRNA:U1:95Cc	snRNA	3R:19652055-19652219	1.695E-02	1.048E-02	7.307E-04	1.286E-02	1.800E-03	2.319E-02	1.043E+01	3.673E-03	4.898E-03	8.133E-03		1.967E-03	4.679E-03	8.885E-02	1.296E-01	4.679E-04	6.568E-03	1.073E+01	2.758E-02	3.078E-02	3.333E-03
FBgn0011232	snRNA:U6:96Aa	snRNA	3R:20381809-20381916	2.111E-03	2.394E-02	3.490E-01	3.957E-01	9.813E-05	6.100E-02	7.665E+00	7.758E-07	2.019E-06	3.852E-04		2.013E-03	1.791E-02	2.751E-01	3.182E-01	1.252E-04	1.033E-01	5.469E+00	2.229E-08	6.858E-08	2.170E-04
FBgn0011236	snRNA:U6:96Ab	snRNA	3R:20382413-20382520	1.279E-02	2.845E-03	5.733E-07	1.896E-04	5.005E-03	1.090E-02	9.354E+00	4.025E-03	5.336E-03	1.307E-02		2.257E-02	2.099E-02	5.418E-03	1.823E-02	1.197E-03	7.243E-02	6.707E+00	4.095E-07	9.767E-07	3.468E-03
FBgn0011241	snRNA:U6:96Ac	snRNA	3R:20382936-20383043	4.392E-03	6.979E-03	3.467E-02	8.945E-02	7.005E-04	1.308E-02	7.652E+00	7.154E-03	9.141E-03	3.738E-03		5.626E-04	3.793E-03	2.365E-01	2.811E-01	1.651E-04	1.381E-02	7.702E+00	2.684E-03	3.441E-03	4.535E-04
FBgn0011259	snRNA:U2:34ABa	snRNA	2L:13211924-13212116	6.603E-03	3.124E-01	3.700E-01	4.149E-01	2.353E-05	2.088E-01	4.533E+00	9.537E-06	2.001E-05	3.520E-04		1.804E-01	2.795E-01	3.264E-02	6.207E-02	7.184E-04	4.085E-01	3.709E+00	3.501E-06	7.087E-06	4.915E-03
FBgn0011260	snRNA:U2:34ABb	snRNA	2L:13215838-13216030	2.296E-03	5.424E-03	7.728E-02	1.384E-01	4.712E-04	1.872E-02	1.025E+01	7.623E-04	1.128E-03	1.365E-03		1.737E-02	3.905E-03	6.266E-07	1.361E-04	4.951E-03	1.367E-01	8.285E+00	9.214E-11	4.922E-10	1.415E-03
FBgn0011272	Ser	protein_coding	3R:22997811-23019989	4.902E-04	8.389E-04	4.338E-02	1.006E-01	6.505E-04	5.865E-04	1.391E+01	2.477E-01	2.582E-01	9.304E-03		3.328E-03	4.546E-03	2.148E-02	4.649E-02	8.150E-04	5.315E-03	1.351E+01	1.099E-03	1.485E-03	6.970E-03
FBgn0011279	ct	protein_coding	X:7503180-7572892	1.936E-02	1.166E-01	2.030E-01	2.619E-01	1.848E-04	4.476E-01	6.767E+00	3.837E-06	8.742E-06	4.814E-04		4.343E-02	2.334E-02	3.259E-04	3.420E-03	2.072E-03	1.733E-01	8.290E+00	1.029E-07	2.765E-07	2.789E-03
FBgn0011280	nonA	protein_coding	X:16255601-16265580	9.280E-03	3.105E-02	1.438E-01	2.061E-01	3.326E-04	5.449E-02	1.178E+01	2.778E-09	1.253E-08	1.896E-03		2.031E-02	2.189E-02	9.860E-03	2.697E-02	1.033E-03	3.856E-02	1.235E+01	1.838E-09	7.099E-09	5.862E-03
FBgn0011281	mex1	protein_coding	3L:15510523-15512692	8.522E-02	1.039E-01	1.532E-02	6.095E-02	9.128E-04	3.077E-01	8.584E+00	1.074E-11	9.213E-11	3.083E-03		1.097E-01	3.578E-02	1.143E-05	6.533E-04	3.414E-03	1.103E-01	1.008E+01	2.984E-10	1.415E-09	1.107E-02
FBgn0011283	Hrb87F	protein_coding	3R:9482567-9486253	6.752E-02	1.066E-01	3.471E-02	8.946E-02	7.048E-04	6.876E-01	7.394E+00	7.705E-08	2.515E-07	1.093E-03		1.372E-01	9.918E-02	1.667E-03	8.539E-03	1.540E-03	3.043E-01	7.961E+00	4.755E-08	1.368E-07	5.018E-03
FBgn0011284	Dpt	protein_coding	2R:14753269-14753765	4.101E-04	5.887E-04	2.596E-02	7.751E-02	7.754E-04	1.674E-04	1.383E+01	3.730E-01	3.834E-01	2.726E-02		1.455E-03	2.580E-03	4.474E-02	7.820E-02	6.275E-04	2.906E-03	1.334E+01	4.164E-04	6.032E-04	5.572E-03
FBgn0011286	Syt1	protein_coding	2L:2772326-2799979	7.832E-02	9.445E-02	1.234E-02	5.498E-02	9.230E-04	1.529E-01	6.405E+00	3.745E-07	1.053E-06	5.701E-03		9.915E-03	3.082E-02	1.170E-01	1.604E-01	3.582E-04	5.070E-02	8.198E+00	7.452E-05	1.208E-04	2.177E-03
FBgn0011288	Rdl	protein_coding	3L:9138937-9175249	1.645E-02	3.440E-02	6.545E-02	1.257E-01	5.323E-04	7.985E-02	9.572E+00	1.514E-08	5.736E-08	2.293E-03		1.898E-03	7.677E-03	1.623E-01	2.074E-01	2.752E-04	4.750E-02	1.044E+01	1.250E-09	5.064E-09	4.449E-04
FBgn0011289	T48	protein_coding	3R:22707455-22736719	2.947E-03	6.149E-03	6.812E-02	1.285E-01	5.335E-04	6.970E-03	9.832E+00	2.245E-03	3.087E-03	4.706E-03		1.229E-03	1.289E-03	8.478E-03	2.451E-02	1.061E-03	9.314E-03	9.529E+00	2.103E-06	4.413E-06	1.468E-03
FBgn0011290	Wnt2	protein_coding	2R:5381670-5390693	3.722E-03	7.654E-03	6.736E-02	1.277E-01	5.412E-04	1.339E-02	8.884E+00	1.964E-03	2.726E-03	3.094E-03		9.286E-03	6.353E-03	1.249E-03	7.207E-03	1.627E-03	1.418E-02	8.043E+00	2.187E-02	2.475E-02	7.290E-03
FBgn0011291	HmgD	protein_coding	2R:17588962-17604232	6.006E-03	3.491E-02	2.506E-01	3.060E-01	1.915E-04	4.433E-02	7.548E+00	5.788E-03	7.490E-03	1.508E-03		1.146E-02	3.098E-02	1.116E-01	1.546E-01	4.116E-04	4.765E-02	5.454E+00	4.086E-06	8.157E-06	2.676E-03
FBgn0011293	porin	protein_coding	2L:10847226-10850848	4.107E-02	9.868E-02	9.289E-02	1.545E-01	4.632E-04	3.278E-01	7.630E+00	3.605E-06	8.278E-06	1.394E-03		3.666E-02	1.607E-02	9.122E-05	1.767E-03	2.539E-03	5.483E-02	9.020E+00	5.586E-04	7.927E-04	7.443E-03
FBgn0011294	18w	protein_coding	2R:15999015-16004437	7.219E-02	6.353E-02	4.223E-03	3.267E-02	1.265E-03	3.210E-01	4.649E+00	8.773E-10	4.479E-09	2.503E-03		1.123E-01	3.582E-02	1.031E-05	6.402E-04	3.490E-03	2.264E-01	6.000E+00	1.640E-05	2.955E-05	5.522E-03
FBgn0011296	mei-41	protein_coding	X:16285730-16293883	2.857E-02	2.772E-02	5.950E-03	3.931E-02	1.147E-03	9.330E-02	1.144E+01	1.786E-09	8.448E-09	3.409E-03		5.456E-04	7.613E-03	3.422E-01	3.817E-01	7.977E-05	6.057E-02	1.187E+01	3.753E-07	8.975E-07	1.003E-04
FBgn0011297	Ptp4E	protein_coding	X:4833160-4849949	1.129E-02	1.066E-02	5.789E-03	3.880E-02	1.178E-03	1.224E-01	7.913E+00	2.472E-08	8.974E-08	1.026E-03		2.032E-02	5.424E-02	9.854E-02	1.402E-01	4.170E-04	4.081E-01	6.424E+00	6.557E-10	2.841E-09	5.543E-04
FBgn0011300	Ptp99A	protein_coding	3R:25203367-25312853	9.986E-03	2.076E-02	6.543E-02	1.257E-01	5.353E-04	5.121E-02	7.785E+00	1.026E-03	1.488E-03	2.171E-03		1.109E-02	3.664E-02	1.471E-01	1.922E-01	3.370E-04	4.328E-03	5.309E+00	3.088E-01	3.135E-01	2.853E-02
FBgn0011305	Ptp10D	protein_coding	X:11516047-11571371	4.474E-03	5.324E-03	1.380E-02	5.787E-02	9.354E-04	1.311E-02	8.677E+00	6.193E-02	6.941E-02	3.798E-03		3.406E-03	4.238E-03	1.611E-02	3.752E-02	8.944E-04	2.210E-02	8.611E+00	9.215E-03	1.094E-02	1.715E-03
FBgn0011327	aly	protein_coding	3L:3024128-3026521	6.939E-03	2.669E-02	1.593E-01	2.208E-01	2.893E-04	6.815E-02	9.188E+00	5.801E-06	1.276E-05	1.133E-03		8.387E-03	4.946E-03	5.633E-04	4.672E-03	1.888E-03	4.944E-02	9.836E+00	1.454E-06	3.126E-06	1.888E-03
FBgn0011335	fwd	protein_coding	3L:305392-319884	8.611E-03	1.439E-02	3.169E-02	8.621E-02	6.659E-04	5.259E-02	8.422E+00	2.586E-04	4.138E-04	1.823E-03		3.048E-16	2.112E-02	5.452E-01	5.712E-01	1.606E-17	1.225E-01	6.285E+00	7.965E-08	2.195E-07	2.769E-17
FBgn0011336	neb	protein_coding	2L:20075756-20089698	2.790E-03	4.177E-03	2.908E-02	8.178E-02	7.434E-04	1.227E-02	1.019E+01	7.160E-06	1.539E-05	2.530E-03		3.420E-03	5.665E-03	3.586E-02	6.654E-02	6.719E-04	1.621E-02	1.022E+01	1.184E-06	2.585E-06	2.348E-03
FBgn0011361	Klp61F	protein_coding	3L:1241567-1245910	1.182E-03	4.833E-03	1.705E-01	2.311E-01	2.721E-04	2.030E-02	1.150E+01	3.958E-06	8.980E-06	6.480E-04		1.497E-02	1.151E-02	2.268E-03	1.034E-02	1.447E-03	7.552E-03	1.153E+01	5.262E-03	6.466E-03	2.206E-02
FBgn0011455	Klp67A	protein_coding	3L:9355735-9360146	7.238E-03	1.169E-02	3.412E-02	8.896E-02	6.892E-04	2.051E-02	1.261E+01	2.589E-08	9.332E-08	3.927E-03		9.430E-03	4.582E-03	1.772E-04	2.477E-03	2.291E-03	1.473E-02	1.271E+01	9.291E-13	8.243E-12	7.127E-03
FBgn0011474	Klp64D	protein_coding	3L:5349963-5352492	2.078E-02	1.556E-01	2.649E-01	3.188E-01	1.486E-04	3.721E-01	7.654E+00	2.646E-07	7.703E-07	6.216E-04		Not expressed in males	-	-	-	-	-	-	-	-	-
FBgn0011476	Klp68D	protein_coding	3L:11788713-11791975	3.202E-03	2.027E-02	2.876E-01	3.410E-01	1.758E-04	6.525E-02	7.500E+00	3.913E-06	8.894E-06	5.461E-04		5.166E-03	1.288E-02	9.918E-02	1.409E-01	4.466E-04	3.553E-02	7.155E+00	1.566E-03	2.069E-03	1.619E-03
FBgn0011481	Klp98A	protein_coding	3R:23373496-23384867	3.969E-03	1.154E-02	9.403E-02	1.557E-01	3.830E-04	2.160E-02	9.061E+00	9.886E-02	1.082E-01	2.045E-03		9.033E-03	9.903E-03	9.248E-03	2.588E-02	1.015E-03	6.068E-03	6.921E+00	4.101E-01	4.136E-01	1.657E-02
FBgn0011509	bnk	protein_coding	3R:27019083-27020111	2.863E-03	3.113E-02	3.755E-01	4.199E-01	1.024E-04	2.531E-02	8.430E+00	3.055E-03	4.124E-03	1.259E-03		8.314E-03	5.603E-02	2.364E-01	2.811E-01	1.652E-04	6.514E-02	6.553E+00	4.767E-04	6.840E-04	1.421E-03
FBgn0011554	RasGAP1	protein_coding	3L:9832192-9848385	5.025E-02	6.699E-02	2.080E-02	7.054E-02	8.350E-04	1.774E-01	7.783E+00	1.752E-08	6.545E-08	3.152E-03		3.685E-02	8.022E-02	7.632E-02	1.157E-01	5.113E-04	3.061E-01	6.639E+00	2.296E-10	1.124E-09	1.340E-03
FBgn0011555	shtd	protein_coding	X:15349576-15356474	1.839E-02	2.255E-02	1.205E-02	5.435E-02	9.080E-04	1.815E-01	1.200E+01	1.699E-23	6.427E-21	1.128E-03		8.315E-02	6.663E-02	2.759E-03	1.164E-02	1.389E-03	1.818E-01	1.180E+01	1.478E-19	9.776E-18	5.090E-03
FBgn0011556	pdm2	protein_coding	2L:12657164-12686306	1.932E-02	2.965E-02	2.855E-02	8.096E-02	7.251E-04	1.467E-01	9.661E+00	2.118E-15	5.289E-14	1.466E-03		9.485E-03	2.692E-02	1.199E-01	1.636E-01	3.922E-04	1.199E-01	9.168E+00	9.884E-13	8.722E-12	8.805E-04
FBgn0011566	unk	protein_coding	3R:18975374-18983584	1.320E-02	3.531E-02	1.044E-01	1.666E-01	4.162E-04	4.290E-02	5.800E+00	1.749E-03	2.445E-03	3.426E-03		Not expressed in males	-	-	-	-	-	-	-	-	-
FBgn0011570	CrebA	protein_coding	3L:15528494-15546314	3.489E-03	4.631E-03	1.855E-02	6.691E-02	8.385E-04	2.009E-03	9.998E+00	1.976E-01	2.081E-01	1.933E-02		9.989E-03	9.219E-03	4.927E-03	1.707E-02	1.206E-03	1.180E-02	9.122E+00	8.241E-03	9.841E-03	9.426E-03
FBgn0011571	Vinc	protein_coding	X:2108379-2116600	4.908E-03	7.972E-03	2.946E-02	8.229E-02	6.854E-04	1.925E-02	1.046E+01	9.696E-05	1.678E-04	2.838E-03		3.130E-03	3.843E-03	1.588E-02	3.708E-02	9.067E-04	1.688E-02	9.149E+00	4.354E-03	5.417E-03	2.064E-03
FBgn0011573	rhi	protein_coding	2R:13515995-13521021	2.195E-03	8.738E-03	1.935E-01	2.532E-01	2.796E-04	9.286E-03	1.021E+01	3.358E-03	4.507E-03	2.631E-03		1.393E-03	5.041E-03	1.636E-01	2.087E-01	3.076E-04	6.534E-03	9.750E+00	3.130E-02	3.470E-02	2.373E-03
FBgn0011576	Pep	protein_coding	3L:17631202-17638136	4.032E-02	9.546E-02	7.172E-02	1.327E-01	4.701E-04	5.605E-01	8.227E+00	3.180E-20	3.760E-18	8.006E-04		9.792E-03	1.494E-02	2.734E-02	5.485E-02	7.294E-04	2.279E-01	9.493E+00	5.313E-16	1.153E-14	4.783E-04
FBgn0011581	RpS14a	protein_coding	X:7827774-7828710	2.147E-02	3.374E-02	3.412E-02	8.896E-02	7.082E-04	1.721E-01	6.814E+00	1.251E-09	6.181E-09	1.389E-03		3.405E-03	4.839E-03	2.450E-02	5.091E-02	7.833E-04	1.085E-01	8.927E+00	1.688E-09	6.581E-09	3.494E-04
FBgn0011586	RpS14b	protein_coding	X:7828930-7829825	1.708E-03	4.810E-03	1.185E-01	1.801E-01	3.952E-04	4.272E-02	1.055E+01	7.351E-07	1.924E-06	4.449E-04		1.965E-03	5.219E-03	1.032E-01	1.452E-01	4.191E-04	2.396E-02	9.352E+00	5.511E-03	6.752E-03	9.129E-04
FBgn0011591	tam	protein_coding	2L:13823979-13827772	1.896E-02	3.173E-02	3.367E-02	8.858E-02	6.651E-04	1.163E-01	7.612E+00	1.687E-10	1.043E-09	1.814E-03		5.980E-03	1.225E-02	6.697E-02	1.045E-01	5.435E-04	2.763E-02	7.783E+00	7.550E-08	2.091E-07	2.409E-03
FBgn0011592	DNApol-gamma35	protein_coding	2L:13831481-13833105	7.964E-03	2.184E-02	1.103E-01	1.723E-01	4.058E-04	3.468E-02	8.159E+00	1.443E-02	1.758E-02	2.556E-03		3.537E-02	1.399E-02	4.574E-05	1.272E-03	2.815E-03	3.319E-02	5.270E+00	6.583E-03	7.987E-03	1.186E-02
FBgn0011603	msopa	protein_coding	3L:22075819-22076467	3.508E-02	8.226E-02	8.354E-02	1.450E-01	4.747E-04	2.554E-01	6.763E+00	3.331E-07	9.479E-07	1.529E-03		1.197E-02	1.370E-02	1.183E-02	3.030E-02	9.727E-04	7.094E-02	8.244E+00	4.006E-05	6.768E-05	1.878E-03
FBgn0011604	me31B	protein_coding	2L:10239340-10242172	3.811E-03	4.367E-03	1.133E-02	5.293E-02	9.714E-04	2.948E-02	1.076E+01	4.982E-05	9.113E-05	1.439E-03		3.413E-03	4.594E-03	2.112E-02	4.588E-02	8.270E-04	3.316E-02	1.007E+01	8.858E-06	1.667E-05	1.146E-03
FBgn0011606	LysB	protein_coding	3L:1207370-1207981	3.169E-02	6.760E-02	6.122E-02	1.212E-01	5.218E-04	9.440E-02	7.858E+00	1.830E-07	5.531E-07	3.736E-03		8.564E-03	9.298E-03	1.006E-02	2.734E-02	1.025E-03	6.283E-02	8.240E+00	1.511E-06	3.236E-06	1.517E-03
FBgn0011638	LysC	protein_coding	3L:1210484-1210971	5.693E-03	9.637E-03	3.972E-02	9.570E-02	6.575E-04	3.524E-02	1.006E+01	2.843E-11	2.170E-10	1.798E-03		3.318E-03	1.070E-02	1.367E-01	1.816E-01	3.452E-04	2.125E-02	6.736E+00	6.821E-04	9.546E-04	1.738E-03
FBgn0011640	LysD	protein_coding	3L:1210716-1211196	1.110E-03	8.519E-03	3.263E-01	3.753E-01	1.450E-04	1.430E-02	1.041E+01	1.405E-01	1.505E-01	8.639E-04		1.364E-03	6.316E-03	2.265E-01	2.717E-01	2.405E-04	6.977E-03	9.214E+00	1.403E-01	1.462E-01	2.177E-03
FBgn0011642	LysE	protein_coding	3L:1212826-1213406	1.388E-02	1.856E-02	2.056E-02	7.014E-02	8.324E-04	2.385E-02	9.545E+00	1.052E-07	3.347E-07	6.480E-03		1.194E-03	5.877E-03	2.401E-01	2.844E-01	2.261E-04	6.309E-03	9.183E+00	1.217E-05	2.242E-05	2.106E-03
FBgn0011648	LysP	protein_coding	3L:1218081-1218696	1.639E-02	2.130E-02	1.832E-02	6.658E-02	8.566E-04	2.866E-02	9.050E+00	3.148E-03	4.242E-03	6.364E-03		1.102E-02	3.480E-02	1.304E-01	1.752E-01	3.524E-04	4.666E-02	7.772E+00	5.775E-02	6.234E-02	2.629E-03
FBgn0011655	LysS	protein_coding	3L:1227746-1228238	8.526E-03	1.579E-02	4.973E-02	1.085E-01	6.009E-04	2.248E-02	9.173E+00	4.579E-04	7.041E-04	4.221E-03		1.322E-02	1.045E-02	2.562E-03	1.119E-02	1.409E-03	4.395E-02	8.394E+00	1.269E-02	1.478E-02	3.349E-03
FBgn0011659	LysX	protein_coding	3L:1194738-1195302	3.710E-02	6.562E-02	4.602E-02	1.039E-01	6.294E-04	7.576E-02	5.028E+00	1.717E-04	2.846E-04	5.451E-03		Not expressed in males	-	-	-	-	-	-	-	-	-
FBgn0011660	Cyp1	protein_coding	X:16211705-16214403	2.552E-02	9.691E-02	1.683E-01	2.294E-01	2.931E-04	3.220E-01	5.169E+00	1.610E-10	1.003E-09	8.823E-04		2.181E-19	2.593E-02	5.350E-01	5.615E-01	9.364E-21	4.879E-02	3.757E+00	8.017E-06	1.520E-05	4.977E-20
FBgn0011661	Galphaq	protein_coding	2R:8500244-8510702	1.992E-03	2.027E-03	6.402E-03	4.077E-02	1.094E-03	7.339E-04	1.225E+01	4.335E-01	4.432E-01	3.022E-02		2.816E-03	3.220E-03	1.204E-02	3.067E-02	9.732E-04	1.103E-02	1.184E+01	1.146E-02	1.344E-02	2.842E-03
FBgn0011674	UbcD6	protein_coding	3R:774476-778404	1.411E-02	4.369E-02	1.268E-01	1.890E-01	3.595E-04	5.012E-02	6.351E+00	6.941E-03	8.879E-03	3.134E-03		1.662E-02	3.774E-02	7.354E-02	1.123E-01	4.902E-04	1.076E-01	4.373E+00	6.179E-06	1.194E-05	1.719E-03
FBgn0011692	Ten-m	protein_coding	3L:22286143-22400963	3.130E-02	7.502E-02	8.151E-02	1.429E-01	4.644E-04	2.111E-01	6.749E+00	1.733E-08	6.483E-08	1.651E-03		Not expressed in males	-	-	-	-	-	-	-	-	-
FBgn0011693	mew	protein_coding	X:13108441-13152523	2.485E-02	4.374E-02	4.674E-02	1.048E-01	6.324E-04	5.244E-02	1.154E+01	1.018E-11	8.837E-11	5.275E-03		1.425E-02	4.697E-03	1.266E-05	6.645E-04	3.378E-03	6.212E-02	1.255E+01	1.395E-15	2.610E-14	2.554E-03
FBgn0011695	Pk17E	protein_coding	X:18682496-18700090	6.081E-03	7.293E-03	1.454E-02	5.928E-02	9.282E-04	2.266E-02	1.298E+01	9.823E-09	3.905E-08	2.987E-03		1.269E-02	3.508E-03	4.887E-06	4.141E-04	4.025E-03	2.602E-02	1.360E+01	8.290E-13	7.486E-12	5.426E-03
FBgn0011701	RpIII128	protein_coding	2R:7926545-7930128	1.501E-01	1.515E-01	7.605E-03	4.368E-02	1.103E-03	3.787E-01	5.457E+00	2.206E-11	1.726E-10	4.412E-03		6.274E-03	3.266E-02	1.816E-01	2.271E-01	2.138E-04	2.450E-01	7.322E+00	1.288E-08	4.170E-08	2.851E-04
FBgn0011703	Su(P)	protein_coding	3L:16603761-16605299	2.209E-02	4.150E-02	5.395E-02	1.127E-01	5.926E-04	8.983E-02	1.062E+01	1.628E-10	1.013E-09	2.738E-03		Not expressed in males	-	-	-	-	-	-	-	-	-
FBgn0011704	GlyP	protein_coding	2L:2130812-2137296	1.527E-02	2.782E-02	4.555E-02	1.033E-01	6.109E-04	1.548E-01	1.181E+01	1.963E-12	2.162E-11	1.098E-03		7.012E-02	8.508E-02	1.525E-02	3.609E-02	9.174E-04	1.528E-01	6.450E+00	3.582E-07	8.598E-07	5.106E-03
FBgn0011705	Fur1	protein_coding	3R:21173152-21298780	3.488E-03	4.335E-03	1.592E-02	6.218E-02	8.957E-04	1.509E-02	1.024E+01	4.394E-06	9.902E-06	2.574E-03		1.450E-02	4.388E-02	1.200E-01	1.637E-01	3.678E-04	1.425E-01	7.423E+00	1.012E-10	5.374E-10	1.132E-03
FBgn0011708	Ets97D	protein_coding	3R:22736496-22738608	2.193E-03	5.692E-03	1.067E-01	1.688E-01	4.289E-04	1.561E-02	8.791E+00	7.319E-03	9.338E-03	1.564E-03		1.119E-02	5.605E-03	2.130E-04	2.688E-03	2.222E-03	9.679E-03	8.661E+00	6.214E-03	7.562E-03	1.287E-02
FBgn0011710	dy	protein_coding	X:11663801-11672817	6.526E-02	1.564E-01	8.953E-02	1.510E-01	4.644E-04	6.539E-02	9.074E+00	1.470E-01	1.571E-01	1.111E-02		2.134E-02	8.832E-03	6.197E-05	1.496E-03	2.689E-03	6.062E-02	6.060E+00	2.346E-02	2.642E-02	3.918E-03
FBgn0011715	Mdr49	protein_coding	2R:8827827-8833852	1.606E-03	8.291E-03	2.320E-01	2.893E-01	2.155E-04	3.104E-02	9.782E+00	1.504E-08	5.706E-08	5.758E-04		8.383E-03	1.272E-02	3.113E-02	6.014E-02	7.334E-04	8.001E-03	6.935E+00	2.526E-02	2.833E-02	1.166E-02
FBgn0011722	Mdr65	protein_coding	3L:6233599-6238846	1.529E-02	2.401E-02	3.429E-02	8.905E-02	7.085E-04	1.941E-01	6.335E+00	6.145E-08	2.058E-07	8.764E-04		6.204E-02	6.121E-02	6.363E-03	2.025E-02	1.128E-03	3.971E-01	6.789E+00	1.391E-09	5.565E-09	1.739E-03
FBgn0011725	Oct-TyrR	protein_coding	3L:22028102-22058379	4.730E-03	1.367E-02	1.089E-01	1.710E-01	3.850E-04	4.381E-02	9.933E+00	2.437E-06	5.788E-06	1.202E-03		5.572E-03	3.431E-03	7.127E-04	5.271E-03	1.808E-03	2.270E-02	1.145E+01	2.602E-05	4.526E-05	2.732E-03
FBgn0011726	Gad1	protein_coding	3L:4074076-4088744	1.113E-03	3.344E-03	1.187E-01	1.804E-01	3.704E-04	6.957E-03	1.307E+01	1.053E-02	1.308E-02	1.781E-03		3.558E-03	2.121E-03	5.955E-04	4.788E-03	1.867E-03	4.491E-03	1.241E+01	2.791E-02	3.112E-02	8.818E-03
FBgn0011737	Akh	protein_coding	3L:4141466-4142070	8.469E-03	1.678E-02	5.815E-02	1.176E-01	5.618E-04	5.109E-02	8.712E+00	3.733E-08	1.305E-07	1.845E-03		1.782E-03	6.192E-03	1.632E-01	2.083E-01	3.203E-04	4.048E-02	8.973E+00	6.754E-07	1.550E-06	4.899E-04
FBgn0011739	Edg91	protein_coding	3R:13436577-13437233	3.488E-03	1.215E-02	1.654E-01	2.268E-01	3.197E-04	3.467E-02	8.233E+00	1.693E-03	2.373E-03	1.120E-03		5.081E-03	1.324E-02	1.076E-01	1.502E-01	4.271E-04	1.457E-02	8.114E+00	4.492E-02	4.906E-02	3.883E-03
FBgn0011740	Dbp73D	protein_coding	3L:16721595-16723918	3.716E-03	7.010E-03	5.043E-02	1.094E-01	5.900E-04	5.415E-02	8.102E+00	1.591E-04	2.652E-04	7.638E-04		4.207E-03	9.358E-03	7.440E-02	1.135E-01	5.004E-04	8.134E-02	6.879E+00	7.965E-08	2.195E-07	5.757E-04
FBgn0011741	slp2	protein_coding	2L:3836839-3839185	4.049E-03	3.673E-03	4.695E-03	3.435E-02	1.227E-03	1.261E-02	8.794E+00	5.376E-03	6.989E-03	3.575E-03		1.068E-02	1.642E-02	3.154E-02	6.067E-02	7.244E-04	1.290E-02	7.765E+00	3.013E-02	3.348E-02	9.222E-03
FBgn0011745	aos	protein_coding	3L:16463485-16476750	4.952E-17	1.238E-03	6.632E-01	6.824E-01	4.452E-17	2.752E-03	1.008E+01	8.152E-03	1.032E-02	2.003E-16		1.913E-03	3.589E-03	4.436E-02	7.771E-02	5.933E-04	7.059E-03	9.901E+00	2.604E-03	3.344E-03	3.017E-03
FBgn0011746	5-HT7	protein_coding	3R:26793957-26842597	3.627E-03	5.927E-02	4.214E-01	4.610E-01	6.811E-05	6.393E-01	7.655E+00	1.247E-10	8.028E-10	6.315E-05		3.186E-02	2.892E-02	4.734E-03	1.670E-02	1.227E-03	2.343E-01	8.759E+00	2.887E-12	2.268E-11	1.513E-03
FBgn0011747	Rop	protein_coding	3L:4136358-4138996	1.500E-03	1.884E-03	1.471E-02	5.966E-02	8.865E-04	3.062E-03	9.746E+00	2.303E-01	2.409E-01	5.454E-03		1.819E-03	1.388E-03	2.174E-03	1.005E-02	1.459E-03	1.788E-02	9.536E+00	1.344E-05	2.455E-05	1.132E-03
FBgn0011754	Syn	protein_coding	3R:6016410-6048164	2.109E-03	2.731E-03	1.879E-02	6.748E-02	8.596E-04	1.138E-02	1.035E+01	8.864E-02	9.746E-02	2.062E-03		7.190E-03	4.200E-03	5.288E-04	4.521E-03	1.906E-03	1.377E-02	1.018E+01	4.850E-03	5.990E-03	5.813E-03
FBgn0011760	Pxd	protein_coding	3R:12840297-12853709	3.334E-03	3.265E-03	5.875E-03	3.913E-02	1.136E-03	1.140E-02	1.163E+01	3.255E-03	4.381E-03	3.255E-03		2.069E-03	5.205E-03	1.006E-01	1.424E-01	4.425E-04	7.553E-03	1.153E+01	1.658E-02	1.903E-02	3.049E-03
FBgn0011761	Cbp53E	protein_coding	2R:12861431-12883562	2.048E-03	3.551E-03	4.224E-02	9.915E-02	6.420E-04	2.688E-02	1.369E+01	9.380E-11	6.286E-10	8.482E-04		2.464E-02	2.909E-02	1.380E-02	3.364E-02	9.429E-04	3.912E-03	4.502E+00	2.377E-01	2.430E-01	7.011E-02
FBgn0011762	bgcn	protein_coding	2R:19740792-19746444	7.673E-02	9.330E-02	1.452E-02	5.928E-02	9.154E-04	2.859E-01	6.635E+00	2.173E-10	1.306E-09	2.987E-03		Not expressed in males	-	-	-	-	-	-	-	-	-
FBgn0011763	ex	protein_coding	2L:431226-448701	2.883E-03	9.695E-03	1.421E-01	2.045E-01	3.310E-04	1.365E-02	9.972E+00	1.200E-02	1.478E-02	2.351E-03		8.695E-03	2.243E-02	1.057E-01	1.481E-01	4.315E-04	1.693E-02	7.791E+00	1.199E-02	1.401E-02	5.717E-03
FBgn0011764	Rrp1	protein_coding	2L:2969772-2972508	2.423E-03	2.693E-03	9.959E-03	4.973E-02	1.002E-03	7.814E-03	1.008E+01	3.039E-03	4.105E-03	3.452E-03		2.748E-03	2.208E-02	3.247E-01	3.659E-01	1.386E-04	1.187E-02	8.396E+00	1.716E-01	1.774E-01	2.577E-03
FBgn0011768	B52	protein_coding	3R:9487032-9492613	5.065E-04	3.787E-03	3.229E-01	3.722E-01	1.489E-04	2.255E-02	1.142E+01	1.258E-05	2.568E-05	2.500E-04		6.885E-03	5.317E-03	2.285E-03	1.039E-02	1.441E-03	1.483E-02	1.083E+01	2.619E-07	6.461E-07	5.169E-03
FBgn0011769	Eig71Ea	protein_coding	3L:15642225-15642761	2.770E-03	1.143E-02	2.027E-01	2.616E-01	2.698E-04	6.792E-02	6.870E+00	9.144E-04	1.339E-03	4.539E-04		5.429E-03	1.558E-02	1.107E-01	1.537E-01	3.878E-04	6.359E-02	6.670E+00	5.379E-04	7.651E-04	9.503E-04
FBgn0011770	Eig71Eb	protein_coding	3L:15643035-15643641	3.846E-03	8.379E-03	7.617E-02	1.374E-01	5.110E-04	2.126E-02	1.057E+01	2.104E-09	9.726E-09	2.014E-03		1.051E-02	1.375E-02	1.604E-02	3.737E-02	8.502E-04	4.530E-02	1.051E+01	1.579E-13	1.700E-12	2.581E-03
FBgn0011771	Eig71Ec	protein_coding	3L:15644578-15645354	3.856E-03	7.190E-03	5.239E-02	1.114E-01	5.970E-04	5.213E-03	7.982E+00	9.356E-02	1.026E-01	8.235E-03		6.685E-03	8.342E-03	1.670E-02	3.858E-02	8.920E-04	1.031E-02	6.076E+00	1.735E-02	1.988E-02	7.216E-03
FBgn0011774	Eig71Ed	protein_coding	3L:15645636-15646196	1.448E-02	5.100E-02	1.315E-01	1.938E-01	3.161E-04	2.394E-01	7.654E+00	8.153E-10	4.193E-09	6.734E-04		Not expressed in males	-	-	-	-	-	-	-	-	-
FBgn0011785	Eig71Ee	protein_coding	3L:15647571-15649110	7.482E-03	9.852E-03	1.912E-02	6.770E-02	8.453E-04	4.872E-02	8.204E+00	3.451E-04	5.414E-04	1.709E-03		2.326E-03	7.730E-03	1.498E-01	1.949E-01	3.349E-04	2.716E-02	5.649E+00	4.860E-03	6.002E-03	9.534E-04
FBgn0011787	Eig71Ef	protein_coding	3L:15649754-15650490	5.440E-03	1.037E-02	5.387E-02	1.127E-01	5.838E-04	1.964E-02	1.050E+01	1.473E-07	4.520E-07	3.083E-03		0.000E+00	9.034E-03	5.343E-01	5.610E-01	0.000E+00	1.531E-02	9.113E+00	9.288E-04	1.271E-03	0.000E+00
FBgn0011802	Eig71Eg	protein_coding	3L:15650727-15651258	2.849E-02	5.681E-02	5.609E-02	1.150E-01	5.583E-04	8.640E-02	9.043E+00	1.081E-06	2.742E-06	3.671E-03		1.146E-02	2.692E-02	8.277E-02	1.230E-01	4.739E-04	7.433E-01	6.137E+00	1.926E-15	3.447E-14	1.716E-04
FBgn0011817	pros	protein_coding	3R:7154201-7233349	6.431E-03	9.475E-03	2.594E-02	7.751E-02	7.555E-04	1.089E-01	9.755E+00	9.382E-04	1.371E-03	6.574E-04		2.865E-03	5.549E-03	5.908E-02	9.545E-02	5.746E-04	8.623E-02	9.329E+00	3.777E-06	7.599E-06	3.698E-04
FBgn0011818	CycC	protein_coding	3R:10714725-10715927	5.756E-03	5.600E-02	3.288E-01	3.776E-01	1.144E-04	1.320E-01	7.610E+00	9.895E-05	1.709E-04	4.853E-04		8.634E-03	4.239E-02	2.337E-01	2.783E-01	2.267E-04	1.452E-01	6.407E+00	6.353E-05	1.042E-04	6.619E-04
FBgn0011822	Fur2	protein_coding	X:16267118-16275815	4.588E-02	8.507E-02	5.290E-02	1.118E-01	6.003E-04	2.619E-01	6.628E+00	1.743E-12	1.953E-11	1.950E-03		Not expressed in males	-	-	-	-	-	-	-	-	-
FBgn0011823	zfh1	protein_coding	3R:26591647-26614924	4.081E-03	1.512E-02	1.569E-01	2.189E-01	3.004E-04	6.474E-02	1.208E+01	1.056E-09	5.307E-09	7.017E-04		8.110E-03	4.086E-03	2.199E-04	2.731E-03	2.210E-03	1.884E-02	1.285E+01	1.187E-04	1.872E-04	4.792E-03
FBgn0011824	zfh2	protein_coding	4:522435-561500	5.316E-03	1.407E-02	1.070E-01	1.690E-01	4.205E-04	7.497E-02	1.115E+01	1.806E-04	2.975E-04	7.894E-04		2.564E-02	2.610E-02	7.826E-03	2.323E-02	1.093E-03	8.502E-02	8.131E+00	7.199E-04	1.004E-03	3.357E-03
FBgn0011826	Plc21C	protein_coding	2L:305934-355566	4.120E-03	5.241E-03	1.735E-02	6.452E-02	8.751E-04	1.591E-02	9.522E+00	1.370E-03	1.953E-03	2.882E-03		9.225E-03	1.161E-02	1.709E-02	3.925E-02	8.843E-04	6.872E-02	8.091E+00	1.028E-06	2.272E-06	1.494E-03
FBgn0011834	gl	protein_coding	3R:14193648-14198460	2.754E-02	3.557E-02	1.796E-02	6.583E-02	8.618E-04	4.167E-01	9.379E+00	7.690E-23	2.530E-20	7.357E-04		4.960E-02	2.710E-02	3.582E-04	3.634E-03	2.037E-03	3.745E-01	8.870E+00	3.572E-20	2.906E-18	1.475E-03
FBgn0011836	GluRIA	protein_coding	3L:6617131-6628159	4.442E-03	2.314E-02	1.575E-01	2.195E-01	2.137E-04	2.656E-02	8.071E+00	1.325E-03	1.893E-03	1.862E-03		2.115E-15	2.037E-02	5.153E-01	5.433E-01	1.156E-16	6.461E-03	6.126E+00	9.949E-02	1.050E-01	3.643E-15
FBgn0011837	GluRIIA	protein_coding	2L:5555071-5558994	2.018E-02	2.467E-02	1.525E-02	6.074E-02	9.106E-04	1.282E-01	9.637E+00	1.466E-01	1.568E-01	1.752E-03		3.742E-02	5.457E-02	2.774E-02	5.543E-02	7.633E-04	1.414E-01	8.694E+00	2.345E-02	2.641E-02	2.946E-03
FBgn0012034	TkR99D	protein_coding	3R:25776517-25795169	1.118E-02	1.368E-02	1.447E-02	5.922E-02	9.095E-04	5.591E-02	1.153E+01	3.458E-12	3.511E-11	2.225E-03		1.238E-02	2.180E-02	4.482E-02	7.829E-02	6.322E-04	5.330E-02	1.185E+01	2.102E-11	1.305E-10	2.586E-03
FBgn0012036	Gbeta76C	protein_coding	3L:19680736-19683092	5.564E-04	5.427E-03	2.867E-01	3.402E-01	1.141E-04	7.419E-02	1.186E+01	4.575E-12	4.443E-11	8.349E-05		5.001E-04	9.942E-03	3.549E-01	3.933E-01	5.599E-05	4.904E-02	1.222E+01	1.215E-13	1.347E-12	1.135E-04
FBgn0012037	Cys	protein_coding	3R:10394824-10395366	2.391E-02	5.237E-02	7.374E-02	1.349E-01	5.082E-04	7.437E-02	1.099E+01	5.303E-09	2.254E-08	3.578E-03		4.679E-02	1.743E-02	3.289E-05	1.120E-03	2.989E-03	3.620E-02	1.111E+01	2.299E-07	5.724E-07	1.439E-02
FBgn0012051	rho	protein_coding	3L:1463810-1468944	5.398E-03	3.718E-02	3.082E-01	3.586E-01	1.616E-04	2.684E-02	7.122E+00	3.041E-05	5.785E-05	2.238E-03		2.464E-02	2.894E-02	1.255E-02	3.148E-02	9.480E-04	5.241E-02	7.251E+00	2.805E-06	5.747E-06	5.234E-03
FBgn0012058	R	protein_coding	3L:1859114-1862239	1.163E-02	5.442E-02	2.181E-01	2.764E-01	2.378E-04	6.019E-02	7.315E+00	8.241E-03	1.043E-02	2.150E-03		7.345E-03	2.914E-02	1.402E-01	1.850E-01	2.806E-04	4.339E-02	7.336E+00	2.065E-03	2.689E-03	1.884E-03
FBgn0013269	drk	protein_coding	2R:9382726-9390346	7.515E-03	6.426E-03	3.630E-03	3.031E-02	1.302E-03	2.375E-02	1.158E+01	3.701E-06	8.476E-06	3.523E-03		4.870E-03	8.143E-03	3.887E-02	7.045E-02	6.657E-04	7.948E-03	7.318E+00	2.004E-01	2.060E-01	6.821E-03
FBgn0013272	Zw10	protein_coding	X:2498229-2500857	5.163E-03	8.962E-03	4.357E-02	1.009E-01	6.413E-04	1.226E-02	1.198E+01	4.819E-04	7.383E-04	4.688E-03		9.336E-04	2.344E-03	9.965E-02	1.414E-01	4.433E-04	2.191E-02	1.201E+01	6.789E-07	1.557E-06	4.744E-04
FBgn0013303	hh	protein_coding	3R:18953890-18967628	2.822E-03	2.292E-03	2.872E-03	2.660E-02	1.371E-03	5.929E-03	9.772E+00	4.673E-03	6.132E-03	5.298E-03		3.725E-03	2.775E-03	1.896E-03	9.162E-03	1.494E-03	2.549E-03	9.786E+00	1.053E-01	1.109E-01	1.627E-02
FBgn0013305	ogre	protein_coding	X:6867652-6885351	0.000E+00	7.129E-03	7.832E-01	7.929E-01	0.000E+00	1.150E-02	1.012E+01	1.603E-03	2.256E-03	0.000E+00		1.301E-03	3.130E-03	8.765E-02	1.283E-01	4.628E-04	2.152E-02	1.070E+01	2.448E-06	5.090E-06	6.732E-04
FBgn0013307	N	protein_coding	X:3028902-3066254	0.000E+00	3.867E-02	7.403E-01	7.524E-01	0.000E+00	1.787E-01	1.012E+01	4.774E-13	6.185E-12	0.000E+00		8.802E-02	9.579E-02	9.829E-03	2.690E-02	1.023E-03	2.688E-01	9.660E+00	8.324E-17	2.304E-15	3.645E-03
FBgn0013308	svr	protein_coding	X:390478-403105	1.152E-01	1.859E-01	3.538E-02	9.025E-02	6.895E-04	2.660E-01	3.029E+00	6.834E-05	1.213E-04	4.819E-03		6.368E-02	1.120E-01	4.608E-02	7.985E-02	6.329E-04	2.848E-01	3.280E+00	2.471E-09	9.270E-09	2.489E-03
FBgn0013325	yl	protein_coding	X:14087246-14093991	1.767E-04	3.609E-04	5.024E-02	1.093E-01	5.448E-04	5.932E-04	1.378E+01	4.274E-03	5.643E-03	3.315E-03		1.830E-03	1.673E-03	4.854E-03	1.694E-02	1.218E-03	5.735E-03	1.341E+01	5.816E-07	1.352E-06	3.552E-03
FBgn0013334	fs(1)N	protein_coding	X:1216545-1223471	0.000E+00	5.783E-02	9.655E-01	9.661E-01	0.000E+00	7.827E-18	7.177E+00	6.891E-01	6.943E-01	0.000E+00		5.775E-03	7.943E-02	3.840E-01	4.209E-01	8.092E-05	1.294E-01	8.436E+00	2.159E-03	2.804E-03	4.968E-04
FBgn0013342	fru	protein_coding	3R:14239994-14371308	2.317E-02	3.313E-02	2.269E-02	7.286E-02	7.785E-04	1.130E-01	6.106E+00	6.163E-02	6.908E-02	2.283E-03		2.496E-02	7.860E-02	1.444E-01	1.892E-01	3.534E-04	8.215E-03	8.604E+00	3.969E-01	4.006E-01	3.382E-02
FBgn0013347	Pgd	protein_coding	X:2039168-2042599	2.924E-04	2.464E-03	3.349E-01	3.832E-01	1.321E-04	1.030E-02	1.103E+01	2.417E-03	3.312E-03	3.158E-04		2.419E-03	5.013E-03	6.846E-02	1.066E-01	5.372E-04	9.199E-03	1.056E+01	1.706E-03	2.238E-03	2.928E-03
FBgn0013348	wapl	protein_coding	X:2043968-2053016	3.262E-02	5.304E-02	3.248E-02	8.738E-02	6.845E-04	9.601E-02	1.121E+01	6.070E-13	7.725E-12	3.782E-03		5.235E-03	1.258E-02	6.079E-02	9.750E-02	4.630E-04	4.663E-02	1.240E+01	5.149E-11	2.903E-10	1.250E-03
FBgn0013432	fs(1)h	protein_coding	X:7931840-7955469	9.208E-04	8.008E-03	3.453E-01	3.924E-01	1.280E-04	1.721E-02	9.706E+00	1.521E-02	1.845E-02	5.957E-04		9.844E-04	9.551E-03	3.398E-01	3.795E-01	1.147E-04	2.240E-02	8.290E+00	1.352E-03	1.803E-03	4.891E-04
FBgn0013435	mys	protein_coding	X:7955677-7964270	5.955E-03	1.684E-02	9.019E-02	1.516E-01	3.937E-04	3.824E-02	4.119E+00	5.218E-04	7.951E-04	1.733E-03		Not expressed in males	-	-	-	-	-	-	-	-	-
FBgn0013467	sim	protein_coding	3R:8883476-8903846	1.855E-02	8.612E-02	1.865E-01	2.469E-01	2.398E-04	1.663E-01	7.708E+00	2.292E-06	5.473E-06	1.242E-03		4.885E-03	9.131E-03	4.727E-02	8.126E-02	5.955E-04	6.993E-02	9.126E+00	2.672E-04	3.981E-04	7.776E-04
FBgn0013531	Mlc-c	protein_coding	X:5513168-5516572	4.537E-02	5.505E-02	1.524E-02	6.074E-02	9.172E-04	1.131E-01	6.532E+00	4.207E-09	1.824E-08	4.466E-03		1.250E-02	2.134E-02	4.249E-02	7.530E-02	6.521E-04	1.985E-02	5.078E+00	2.344E-02	2.641E-02	7.009E-03
FBgn0013548	mus210	protein_coding	2R:11199014-11205744	1.685E-02	7.224E-02	2.054E-01	2.640E-01	2.596E-04	2.437E-01	8.475E+00	3.433E-10	1.944E-09	7.693E-04		Not expressed in males	-	-	-	-	-	-	-	-	-
FBgn0013563	Ccp84Ag	protein_coding	3R:2512449-2513761	0.000E+00	7.497E-02	8.419E-01	8.479E-01	0.000E+00	4.682E-02	5.853E+00	4.810E-03	6.302E-03	0.000E+00		1.880E-02	1.968E-02	8.481E-03	2.451E-02	1.063E-03	3.354E-02	4.058E+00	2.369E-02	2.667E-02	6.240E-03
FBgn0013717	Ccp84Af	protein_coding	3R:2515323-2515961	1.391E-02	1.895E-02	1.899E-02	6.770E-02	8.171E-04	4.251E-02	8.860E+00	1.529E-05	3.078E-05	3.643E-03		5.042E-03	6.001E-03	1.333E-02	3.291E-02	9.353E-04	1.224E-02	6.552E+00	3.066E-02	3.403E-02	4.587E-03
FBgn0013720	Ccp84Ae	protein_coding	3R:2516608-2517480	3.043E-03	6.722E-03	7.678E-02	1.381E-01	5.039E-04	9.226E-03	1.015E+01	1.693E-05	3.377E-05	3.672E-03		2.830E-03	5.137E-03	5.044E-02	8.541E-02	6.132E-04	1.723E-02	9.884E+00	2.541E-05	4.429E-05	1.828E-03
FBgn0013725	Ccp84Ad	protein_coding	3R:2518453-2519239	1.677E-02	4.436E-02	1.092E-01	1.713E-01	4.208E-04	8.618E-02	4.316E+00	1.045E-04	1.798E-04	2.166E-03		2.211E-02	1.605E-02	1.699E-03	8.647E-03	1.534E-03	3.583E-01	6.069E+00	9.246E-12	6.338E-11	6.869E-04
FBgn0013726	Ccp84Ac	protein_coding	3R:2520869-2521993	1.681E-02	1.370E-02	2.949E-03	2.692E-02	1.365E-03	1.307E-02	1.070E+01	2.306E-04	3.721E-04	1.431E-02		8.854E-03	1.045E-02	1.309E-02	3.244E-02	9.432E-04	1.891E-02	8.809E+00	1.033E-03	1.402E-03	5.211E-03
FBgn0013732	Ccp84Ab	protein_coding	3R:2527689-2528599	1.073E-02	1.177E-02	9.824E-03	4.936E-02	1.015E-03	1.328E-01	8.714E+00	3.099E-13	4.318E-12	8.994E-04		Not expressed in males	-	-	-	-	-	-	-	-	-
FBgn0013746	Ccp84Aa	protein_coding	3R:2529805-2530625	2.102E-03	3.856E-03	4.719E-02	1.050E-01	6.068E-04	1.040E-02	9.284E+00	2.224E-03	3.060E-03	2.250E-03		6.509E-04	4.782E-03	3.201E-01	3.615E-01	1.515E-04	2.477E-03	8.618E+00	1.078E-01	1.135E-01	2.925E-03
FBgn0013749	inaC	protein_coding	2R:12786039-12789080	3.144E-03	5.192E-03	3.871E-02	9.466E-02	6.741E-04	1.359E-02	1.126E+01	3.691E-05	6.914E-05	2.575E-03		3.976E-03	2.505E-03	8.095E-04	5.639E-03	1.767E-03	6.006E-03	1.083E+01	4.129E-03	5.160E-03	7.369E-03
FBgn0013750	retn	protein_coding	2R:19520132-19542343	8.965E-03	1.388E-02	2.745E-02	7.999E-02	7.188E-04	1.944E-02	9.661E+00	5.186E-02	5.866E-02	5.132E-03		2.341E-03	2.741E-02	3.739E-01	4.113E-01	9.506E-05	3.459E-03	9.181E+00	3.937E-01	3.976E-01	7.534E-03
FBgn0013753	mdy	protein_coding	2L:16816659-16826964	3.149E-02	7.436E-02	8.555E-02	1.468E-01	4.714E-04	1.773E-01	7.570E+00	8.878E-12	7.847E-11	1.977E-03		1.579E-02	2.614E-02	3.989E-02	7.176E-02	6.721E-04	2.380E-02	5.436E+00	4.969E-03	6.129E-03	7.382E-03
FBgn0013756	fs(2)ltoPP43	protein_coding	2L:19792772-19795851	3.213E-03	3.444E-02	2.979E-01	3.501E-01	1.038E-04	4.012E-02	8.990E+00	2.166E-02	2.577E-02	8.915E-04		3.480E-04	8.121E-03	4.369E-01	4.703E-01	4.771E-05	2.434E-02	5.983E+00	3.987E-03	4.990E-03	1.592E-04
FBgn0013759	His3.3B	protein_coding	X:9046555-9050702	8.929E-04	1.908E-02	4.533E-01	4.899E-01	5.209E-05	0.000E+00	9.362E+00	5.342E-01	5.424E-01	Inf		3.299E-03	5.685E-02	4.265E-01	4.604E-01	6.460E-05	7.322E-02	8.505E+00	3.907E-02	4.289E-02	5.016E-04
FBgn0013762	Xpac	protein_coding	X:3996987-3998230	2.005E-03	5.395E-03	7.331E-02	1.345E-01	4.137E-04	4.468E-03	9.234E+00	2.420E-01	2.527E-01	4.995E-03		4.264E-03	1.069E-02	9.337E-02	1.345E-01	4.440E-04	5.753E-02	8.323E+00	2.074E-04	3.149E-04	8.251E-04
FBgn0013763	Su(H)	protein_coding	2L:15039487-15043334	1.620E-03	3.738E-03	8.423E-02	1.457E-01	4.825E-04	1.661E-02	1.164E+01	1.003E-08	3.983E-08	1.086E-03		5.196E-03	1.155E-02	6.648E-02	1.041E-01	5.008E-04	2.181E-02	1.151E+01	1.280E-10	6.685E-10	2.652E-03
FBgn0013764	Hrb27C	protein_coding	2L:6920703-6932057	1.095E-02	1.324E-02	1.386E-02	5.795E-02	9.212E-04	6.237E-02	9.026E+00	5.084E-06	1.128E-05	1.955E-03		4.115E-03	9.145E-03	7.663E-02	1.160E-01	5.009E-04	2.755E-03	6.739E+00	4.150E-01	4.183E-01	1.662E-02
FBgn0013770	otk	protein_coding	2R:7888977-7907351	1.269E-03	1.823E-03	2.647E-02	7.842E-02	7.749E-04	1.225E-02	1.290E+01	2.689E-09	1.217E-08	1.154E-03		8.164E-04	1.635E-03	6.061E-02	9.728E-02	5.557E-04	1.238E-02	1.289E+01	4.707E-10	2.120E-09	7.340E-04
FBgn0013771	TkR86C	protein_coding	3R:6563313-6576950	4.855E-03	1.229E-01	4.370E-01	4.747E-01	4.399E-05	3.818E-01	7.870E+00	3.256E-08	1.150E-07	1.416E-04		2.124E-03	3.486E-02	4.189E-01	4.532E-01	6.783E-05	3.271E-01	8.225E+00	5.231E-10	2.334E-09	7.228E-05
FBgn0013773	RYa-R	protein_coding	3R:22822701-22883657	1.316E-02	1.512E-02	1.121E-02	5.272E-02	9.689E-04	2.794E-02	8.351E+00	1.841E-03	2.567E-03	5.243E-03		1.341E-02	3.905E-02	1.014E-01	1.431E-01	3.822E-04	2.588E-01	6.056E+00	1.610E-11	1.026E-10	5.767E-04
FBgn0013799	Ac76E	protein_coding	3L:19932386-19971060	5.200E-03	2.616E-02	2.446E-01	3.001E-01	2.213E-04	0.000E+00	6.428E+00	7.280E-01	7.323E-01	Inf		Not expressed in males	-	-	-	-	-	-	-	-	-
FBgn0013810	B-H2	protein_coding	X:17208613-17218208	5.431E-03	1.501E-02	1.129E-01	1.750E-01	4.029E-04	1.470E-02	3.711E+00	1.570E-02	1.901E-02	4.114E-03		6.615E-03	1.342E-02	6.545E-02	1.028E-01	5.488E-04	1.590E-01	5.601E+00	3.087E-07	7.501E-07	4.631E-04
FBgn0013949	RpII15	protein_coding	3R:10134810-10135900	2.790E-18	2.596E-02	8.688E-01	8.733E-01	1.196E-19	1.888E-01	8.985E+00	8.099E-14	1.326E-12	1.645E-19		6.964E-02	2.008E-01	1.140E-01	1.571E-01	3.860E-04	1.269E-01	9.122E+00	9.245E-15	1.385E-13	6.109E-03
FBgn0013953	Bx42	protein_coding	X:8997902-9000637	3.140E-02	1.887E-02	6.224E-04	1.163E-02	1.853E-03	3.077E-01	6.770E+00	5.734E-11	4.081E-10	1.136E-03		Not expressed in males	-	-	-	-	-	-	-	-	-
FBgn0013954	elB	protein_coding	2L:14390627-14409549	2.102E-03	3.009E-03	2.546E-02	7.684E-02	7.774E-04	8.515E-03	1.298E+01	2.860E-06	6.699E-06	2.747E-03		6.410E-03	3.464E-03	3.511E-04	3.597E-03	2.060E-03	6.866E-03	1.227E+01	3.604E-08	1.068E-07	1.039E-02
FBgn0013972	ci	protein_coding	4:68335-77667	4.218E-02	5.107E-02	1.304E-02	5.646E-02	9.195E-04	2.179E-01	5.401E+00	4.264E-09	1.844E-08	2.154E-03		7.646E-04	2.560E-02	4.745E-01	5.055E-01	3.325E-05	5.236E-02	7.227E+00	5.669E-08	1.607E-07	1.626E-04
FBgn0013981	ph-d	protein_coding	X:2009759-2017319	8.294E-04	2.630E-03	1.404E-01	2.029E-01	3.510E-04	3.035E-03	1.327E+01	1.143E-02	1.411E-02	3.041E-03		1.043E-03	8.807E-04	3.531E-03	1.358E-02	1.318E-03	8.432E-03	1.329E+01	6.472E-05	1.059E-04	1.377E-03
FBgn0013983	ph-p	protein_coding	X:2020242-2032404	7.757E-03	2.360E-02	1.358E-01	1.984E-01	3.659E-04	5.304E-02	5.280E+00	3.889E-03	5.166E-03	1.628E-03		4.505E-03	8.598E-03	5.703E-02	9.320E-02	5.831E-04	5.643E-02	5.488E+00	8.554E-03	1.019E-02	8.885E-04
FBgn0013984	bap	protein_coding	3R:17214601-17216171	3.955E-02	5.468E-02	2.299E-02	7.342E-02	8.052E-04	1.054E-20	6.822E+00	6.870E-01	6.924E-01	4.178E+16		1.838E-02	4.552E-02	8.431E-02	1.247E-01	4.494E-04	2.280E-01	6.039E+00	4.319E-02	4.725E-02	8.974E-04
FBgn0013997	C15	protein_coding	3R:17325707-17338536	0.000E+00	7.371E-03	7.090E-01	7.240E-01	0.000E+00	5.525E-03	8.901E+00	3.585E-01	3.689E-01	0.000E+00		1.521E-03	3.635E-03	8.962E-02	1.303E-01	4.658E-04	1.793E-02	9.022E+00	6.509E-02	6.996E-02	9.445E-04
FBgn0014000	hop	protein_coding	X:11254962-11262131	2.159E-02	2.374E-02	1.003E-02	4.985E-02	1.012E-03	9.962E-02	1.006E+01	8.187E-09	3.318E-08	2.413E-03		4.416E-02	2.161E-02	1.840E-04	2.503E-03	2.275E-03	9.376E-02	1.041E+01	5.947E-09	2.056E-08	5.242E-03
FBgn0014001	Eip78C	protein_coding	3L:21219708-21259603	1.099E-02	5.397E-02	2.384E-01	2.947E-01	2.266E-04	2.002E-02	7.472E+00	2.010E-01	2.114E-01	6.109E-03		0.000E+00	7.985E-02	7.919E-01	8.008E-01	0.000E+00	1.008E-01	5.235E+00	1.567E-02	1.806E-02	0.000E+00
FBgn0014002	RpS2	protein_coding	2L:9896264-9897552	1.355E-03	1.971E-03	2.189E-02	7.187E-02	7.652E-04	1.092E-03	1.331E+01	1.466E-01	1.568E-01	1.381E-02		3.456E-03	2.265E-03	1.001E-03	6.378E-03	1.699E-03	2.754E-03	1.336E+01	1.509E-02	1.742E-02	1.397E-02
FBgn0014006	Gdi	protein_coding	2L:9491175-9494876	3.415E-03	7.108E-03	6.155E-02	1.216E-01	5.349E-04	2.556E-03	9.035E+00	5.373E-02	6.066E-02	1.487E-02		3.118E-03	4.211E-03	2.184E-02	4.715E-02	8.243E-04	1.591E-02	8.206E+00	1.549E-04	2.402E-04	2.182E-03
FBgn0014007	bab1	protein_coding	3L:1036368-1101089	2.747E-02	4.322E-02	3.123E-02	8.540E-02	7.074E-04	1.246E-01	4.911E+00	6.389E-05	1.142E-04	2.453E-03		Not expressed in males	-	-	-	-	-	-	-	-	-
FBgn0014010	piwi	protein_coding	2L:10982204-10987420	4.735E-03	1.239E-02	1.048E-01	1.669E-01	4.255E-04	2.144E-02	1.075E+01	7.086E-04	1.054E-03	2.458E-03		6.479E-03	6.202E-03	6.069E-03	1.963E-02	1.163E-03	3.174E-02	1.091E+01	3.052E-04	4.509E-04	2.272E-03
FBgn0014011	enc	protein_coding	3L:3818678-3842326	1.199E-01	1.207E-01	7.345E-03	4.308E-02	1.106E-03	4.340E-01	7.452E+00	5.265E-02	5.951E-02	3.076E-03		6.863E-02	7.019E-02	8.013E-03	2.362E-02	1.088E-03	1.012E+00	7.105E+00	4.123E-04	5.977E-04	7.552E-04
FBgn0014018	cdi	protein_coding	3R:14870603-14919992	6.284E-02	2.223E-02	2.356E-05	1.990E-03	3.147E-03	1.090E-01	9.864E+00	2.040E-10	1.236E-09	6.417E-03		7.461E-02	1.120E-02	2.000E-08	2.034E-05	7.416E-03	1.261E-01	9.639E+00	1.144E-12	9.927E-12	6.586E-03
FBgn0014019	cas	protein_coding	3R:1538696-1542527	7.294E-02	1.520E-01	6.401E-02	1.239E-01	5.343E-04	3.071E-01	7.334E+00	4.572E-15	1.036E-13	2.644E-03		6.247E-02	2.536E-02	5.411E-05	1.406E-03	2.742E-03	2.256E-01	8.507E+00	2.389E-20	2.068E-18	3.082E-03
FBgn0014020	scrt	protein_coding	3L:3983895-3994003	3.094E-03	2.243E-03	1.635E-03	2.040E-02	1.535E-03	7.383E-04	1.133E+01	2.438E-01	2.545E-01	4.665E-02		2.612E-16	6.015E-03	5.152E-01	5.433E-01	4.834E-17	6.821E-03	1.121E+01	2.496E-03	3.216E-03	4.263E-16
FBgn0014022	orb	protein_coding	3R:19086331-19106578	7.150E-03	2.314E-02	1.283E-01	1.904E-01	3.439E-04	8.031E-02	7.022E+00	3.796E-06	8.667E-06	9.911E-04		Not expressed in males	-	-	-	-	-	-	-	-	-
FBgn0014023	tok	protein_coding	3R:20545418-20574847	3.025E-03	4.402E-03	2.387E-02	7.493E-02	7.651E-04	1.607E-02	8.989E+00	1.047E-02	1.302E-02	2.095E-03		1.098E-02	1.482E-02	1.992E-02	4.392E-02	8.246E-04	1.238E-02	7.729E+00	6.834E-02	7.332E-02	9.869E-03
FBgn0014024	Scsalpha	protein_coding	3L:3814210-3818383	3.664E-03	8.922E-03	7.049E-02	1.314E-01	4.571E-04	1.869E-02	7.922E+00	3.395E-02	3.939E-02	2.182E-03		5.389E-03	1.045E-02	5.659E-02	9.262E-02	5.739E-04	8.682E-03	5.197E+00	8.992E-02	9.532E-02	6.909E-03
FBgn0014026	tws	protein_coding	3R:5951850-5965494	3.798E-04	3.927E-04	8.248E-03	4.529E-02	1.077E-03	6.410E-04	1.388E+01	9.179E-03	1.151E-02	6.596E-03		8.988E-04	1.278E-03	2.336E-02	4.940E-02	7.827E-04	3.167E-03	1.353E+01	6.404E-05	1.050E-04	3.159E-03
FBgn0014028	sob	protein_coding	2L:3578012-3580769	1.757E-02	5.727E-02	1.410E-01	2.032E-01	3.414E-04	4.489E-02	1.216E+01	1.920E-07	5.784E-07	4.356E-03		1.856E-02	8.666E-03	1.362E-04	2.164E-03	2.384E-03	2.156E-02	1.236E+01	6.691E-10	2.892E-09	9.582E-03
FBgn0014029	bowl	protein_coding	2L:3771699-3784121	2.796E-03	6.588E-03	8.664E-02	1.479E-01	4.725E-04	9.462E-03	1.048E+01	4.104E-03	5.434E-03	3.290E-03		3.240E-04	4.644E-03	4.047E-01	4.398E-01	7.766E-05	2.396E-02	9.555E+00	7.957E-05	1.285E-04	1.505E-04
FBgn0014031	fd64A	protein_coding	3L:4018877-4021279	7.666E-03	2.461E-02	1.441E-01	2.064E-01	3.467E-04	9.172E-02	1.019E+01	3.820E-10	2.133E-09	9.303E-04		3.456E-02	2.803E-02	2.923E-03	1.207E-02	1.372E-03	7.857E-02	1.007E+01	2.432E-12	1.942E-11	4.896E-03
FBgn0014032	fd59A	protein_coding	2R:18755681-18758229	8.310E-04	7.096E-03	3.100E-01	3.603E-01	1.304E-04	8.382E-02	8.466E+00	2.564E-08	9.255E-08	1.104E-04		7.339E-03	2.091E-02	1.095E-01	1.523E-01	3.906E-04	1.198E-01	6.147E+00	4.889E-05	8.171E-05	6.820E-04
FBgn0014033	fd96Ca	protein_coding	3R:20908405-20910600	1.172E-02	2.151E-01	4.430E-01	4.804E-01	6.064E-05	8.576E-01	5.335E+00	1.168E-08	4.542E-08	1.521E-04		3.925E-02	5.896E-02	3.033E-02	5.892E-02	7.410E-04	1.366E+00	5.499E+00	2.923E-16	6.893E-15	3.198E-04
FBgn0014037	fd96Cb	protein_coding	3R:20920733-20921821	9.002E-03	3.952E-03	9.138E-05	3.847E-03	2.536E-03	9.425E-03	1.003E+01	1.013E-01	1.107E-01	1.063E-02		5.364E-03	6.323E-03	1.342E-02	3.305E-02	9.443E-04	1.212E-02	9.996E+00	1.854E-02	2.116E-02	4.927E-03
FBgn0014073	Prat	protein_coding	3R:3735319-3737501	3.989E-02	7.578E-02	5.511E-02	1.138E-01	5.860E-04	5.121E-02	4.081E+00	6.157E-02	6.903E-02	8.671E-03		4.554E-03	9.695E-02	4.300E-01	4.635E-01	5.228E-05	1.383E-01	4.801E+00	1.091E-03	1.475E-03	3.665E-04
FBgn0014075	Rb97D	protein_coding	3R:22697850-22701464	2.824E-03	2.683E-03	5.371E-03	3.691E-02	1.171E-03	5.626E-03	8.664E+00	1.900E-01	2.004E-01	5.587E-03		5.589E-03	5.570E-03	7.221E-03	2.201E-02	1.117E-03	1.478E-02	8.139E+00	7.216E-03	8.692E-03	4.210E-03
FBgn0014092	14-3-3zeta	protein_coding	2R:5987181-5997192	1.877E-03	3.749E-03	6.100E-02	1.208E-01	5.574E-04	1.466E-02	9.495E+00	3.863E-11	2.882E-10	1.425E-03		3.447E-03	1.952E-02	2.458E-01	2.899E-01	1.965E-04	6.234E-02	7.942E+00	9.011E-08	2.453E-07	6.155E-04
FBgn0014127	Arl2	protein_coding	3R:4166821-4167594	1.937E-02	3.114E-02	3.372E-02	8.862E-02	6.922E-04	1.127E-01	9.513E+00	5.195E-12	4.938E-11	1.913E-03		5.941E-03	1.260E-02	7.234E-02	1.110E-01	5.247E-04	5.016E-02	8.311E+00	3.002E-08	9.033E-08	1.318E-03
FBgn0014133	Eip63F-1	protein_coding	3L:3909972-3935617	7.143E-03	1.327E-02	4.339E-02	1.006E-01	5.991E-04	1.838E-02	9.766E+00	1.840E-03	2.567E-03	4.326E-03		1.447E-02	3.269E-03	7.298E-07	1.448E-04	4.927E-03	2.260E-02	8.428E+00	1.102E-04	1.747E-04	7.125E-03
FBgn0014141	Eip63F-2	ncRNA	3L:3934717-3935992	1.023E-02	3.676E-02	1.468E-01	2.088E-01	3.099E-04	4.117E-02	9.892E+00	4.800E-05	8.824E-05	2.767E-03		7.517E-03	9.981E-03	2.040E-02	4.470E-02	8.383E-04	4.787E-02	8.919E+00	4.154E-04	6.019E-04	1.748E-03
FBgn0014163	Gnf1	protein_coding	3R:732343-735803	2.433E-22	3.316E-02	6.646E-01	6.833E-01	8.168E-24	1.901E-02	9.530E+00	6.213E-03	8.009E-03	1.425E-22		0.000E+00	2.257E-02	8.128E-01	8.205E-01	0.000E+00	4.374E-02	8.982E+00	1.358E-02	1.577E-02	0.000E+00
FBgn0014184	Hnf4	protein_coding	2L:8687225-8709611	6.576E-04	1.622E-03	9.507E-02	1.568E-01	4.512E-04	3.915E-03	1.325E+01	3.760E-02	4.344E-02	1.870E-03		3.109E-04	1.629E-03	2.499E-01	2.937E-01	2.124E-04	1.183E-02	1.336E+01	4.475E-04	6.444E-04	2.926E-04
FBgn0014189	TfIIB	protein_coding	2L:10431337-10433116	2.628E-03	1.348E-02	2.307E-01	2.883E-01	2.170E-04	4.403E-02	1.168E+01	9.263E-08	2.976E-07	6.644E-04		5.841E-03	6.279E-03	9.549E-03	2.638E-02	1.036E-03	7.292E-03	9.344E+00	9.787E-03	1.159E-02	8.917E-03
FBgn0014269	gol	protein_coding	2R:20960149-20971870	2.316E-03	4.969E-03	5.928E-02	1.188E-01	5.188E-04	4.026E-02	8.165E+00	1.315E-05	2.677E-05	6.404E-04		4.564E-03	4.879E-03	9.522E-03	2.634E-02	1.041E-03	5.125E-03	6.351E+00	1.774E-03	2.323E-03	9.911E-03
FBgn0014340	Ggamma1	protein_coding	2R:4788908-4792296	0.000E+00	4.455E-02	8.668E-01	8.714E-01	0.000E+00	8.495E-02	5.256E+00	1.506E-02	1.829E-02	0.000E+00		Not expressed in males	-	-	-	-	-	-	-	-	-
FBgn0014343	Top1	protein_coding	X:15213511-15222062	2.233E-02	3.533E-02	3.496E-02	8.970E-02	7.036E-04	7.263E-02	3.928E+00	1.080E-01	1.175E-01	3.422E-03		Not expressed in males	-	-	-	-	-	-	-	-	-
FBgn0014366	eIF-2beta	protein_coding	3L:12518192-12519831	4.908E-03	9.153E-03	4.117E-02	9.779E-02	5.969E-04	1.342E-02	9.562E+00	3.932E-04	6.113E-04	4.071E-03		3.349E-03	1.948E-02	2.753E-01	3.183E-01	1.913E-04	1.102E-02	8.243E+00	7.464E-03	8.973E-03	3.385E-03
FBgn0014380	os	protein_coding	X:18199386-18203324	1.996E-02	3.752E-02	5.002E-02	1.089E-01	5.921E-04	4.474E-02	9.301E+00	4.019E-09	1.750E-08	4.965E-03		5.089E-03	6.834E-03	2.140E-02	4.640E-02	8.289E-04	2.659E-02	9.558E+00	1.297E-10	6.759E-10	2.130E-03
FBgn0014388	por	protein_coding	X:18271553-18273887	3.501E-02	3.820E-02	9.746E-03	4.906E-02	1.020E-03	1.087E-01	6.006E+00	7.720E-03	9.813E-03	3.586E-03		3.651E-02	3.364E-02	5.146E-03	1.761E-02	1.208E-03	1.898E-01	6.515E+00	2.587E-05	4.504E-05	2.141E-03
FBgn0014391	phm	protein_coding	X:18579798-18582466	3.753E-03	7.336E-03	5.563E-02	1.145E-01	5.694E-04	8.377E-03	1.336E+01	1.249E-05	2.551E-05	4.987E-03		4.915E-03	3.695E-03	2.011E-03	9.544E-03	1.481E-03	1.039E-02	1.335E+01	7.015E-08	1.955E-07	5.266E-03
FBgn0014396	gig	protein_coding	3L:20122280-20132110	5.908E-02	3.131E-02	2.995E-04	7.680E-03	2.101E-03	2.029E-01	4.357E+00	1.130E-01	1.226E-01	3.240E-03		Not expressed in males	-	-	-	-	-	-	-	-	-
FBgn0014411	Sam-S	protein_coding	2L:106902-114432	8.892E-04	3.726E-03	1.291E-01	1.913E-01	2.656E-04	4.110E-03	9.833E+00	3.072E-02	3.586E-02	2.408E-03		1.910E-03	1.292E-02	3.025E-01	3.445E-01	1.645E-04	9.708E-03	9.055E+00	8.414E-03	1.004E-02	2.190E-03
FBgn0014417	nmd	protein_coding	2L:10302172-10303947	7.022E-03	2.028E-02	1.271E-01	1.893E-01	3.855E-04	4.529E-01	7.604E+00	8.619E-16	2.406E-14	1.726E-04		Not expressed in males	-	-	-	-	-	-	-	-	-
FBgn0014427	Su(fu)	protein_coding	3R:8515594-8517190	1.038E-03	4.424E-03	2.042E-01	2.631E-01	2.611E-04	3.403E-02	1.014E+01	2.708E-10	1.583E-09	3.394E-04		1.380E-02	3.023E-02	5.789E-02	9.406E-02	5.080E-04	9.993E-02	9.465E+00	1.348E-13	1.482E-12	1.537E-03
FBgn0014455	ash1	protein_coding	3L:19583872-19591855	9.213E-03	5.554E-03	6.324E-04	1.164E-02	1.846E-03	1.218E-02	1.223E+01	4.983E-04	7.621E-04	8.417E-03		6.868E-03	1.143E-02	3.449E-02	6.460E-02	6.689E-04	3.253E-02	1.027E+01	1.740E-06	3.697E-06	2.350E-03
FBgn0014464	fs(1)M3	protein_coding	X:5852239-5858280	2.091E-01	3.351E-01	3.127E-02	8.546E-02	6.944E-04	3.709E-01	9.710E+00	9.010E-03	1.132E-02	6.274E-03		Not expressed in males	-	-	-	-	-	-	-	-	-
FBgn0014466	Yp2	protein_coding	X:9944983-9946669	1.134E-01	2.289E-01	5.450E-02	1.133E-01	5.514E-04	2.009E-01	1.068E+01	1.087E-05	2.250E-05	6.282E-03		Not expressed in males	-	-	-	-	-	-	-	-	-
FBgn0014469	U2af50	protein_coding	X:16250728-16253072	6.240E-03	7.419E-03	1.228E-02	5.477E-02	9.362E-04	1.219E-01	1.130E+01	9.559E-20	1.019E-17	5.697E-04		5.100E-03	5.180E-03	6.747E-03	2.106E-02	1.096E-03	7.510E-02	1.177E+01	5.987E-20	4.510E-18	7.559E-04
FBgn0014857	ewg	protein_coding	X:162541-173751	1.023E-03	5.707E-03	2.073E-01	2.659E-01	1.994E-04	5.335E-03	1.132E+01	7.176E-02	7.970E-02	2.133E-03		6.606E-04	3.886E-03	2.603E-01	3.040E-01	1.892E-04	5.942E-03	1.110E+01	3.378E-02	3.734E-02	1.238E-03
FBgn0014861	RpS17	protein_coding	3L:9421894-9422921	1.820E-03	3.470E-02	4.158E-01	4.558E-01	5.840E-05	6.373E-02	9.954E+00	1.444E-07	4.437E-07	3.180E-04		Not expressed in males	-	-	-	-	-	-	-	-	-
FBgn0014863	Mbs	protein_coding	3L:16045058-16075126	2.046E-02	3.713E-02	4.904E-02	1.077E-01	6.135E-04	4.122E-02	1.202E+01	1.386E-07	4.285E-07	5.525E-03		5.901E-03	5.704E-03	6.338E-03	2.021E-02	1.151E-03	2.355E-02	1.228E+01	4.430E-08	1.285E-07	2.789E-03
[truncated: 8,254 more rows]

## Sheet: F
F. Comparison of mutational variance for genes within GO categories to that of genes outside the GO categories
[truncated: 618 more rows]

## Sheet: G
G. Comparison of apparent stabilizing selection for genes within GO categories to that of genes outside the GO categories
[truncated: 618 more rows]
